# Supplementary material for: Microbial taxonomical composition in spruce phyllosphere, but not community functional structure, varies by geographical location
Source: PubMed Central journal article supplement (PMC6644631; doi:10.7717/peerj.7376), 2019-07-19

Supplemental Figure 1. Heatmap of abundant OTUs abundance. Replicates and OTUs were clustered according to the Bray-Curtis distances. A total of 20 and 24 abundant OTUs were identified in 16S (A) and ITS (B) datasets, respectively. There are one and four unclassified OTUs at phylum (in 16S datasets) and order (in ITS datasets) level

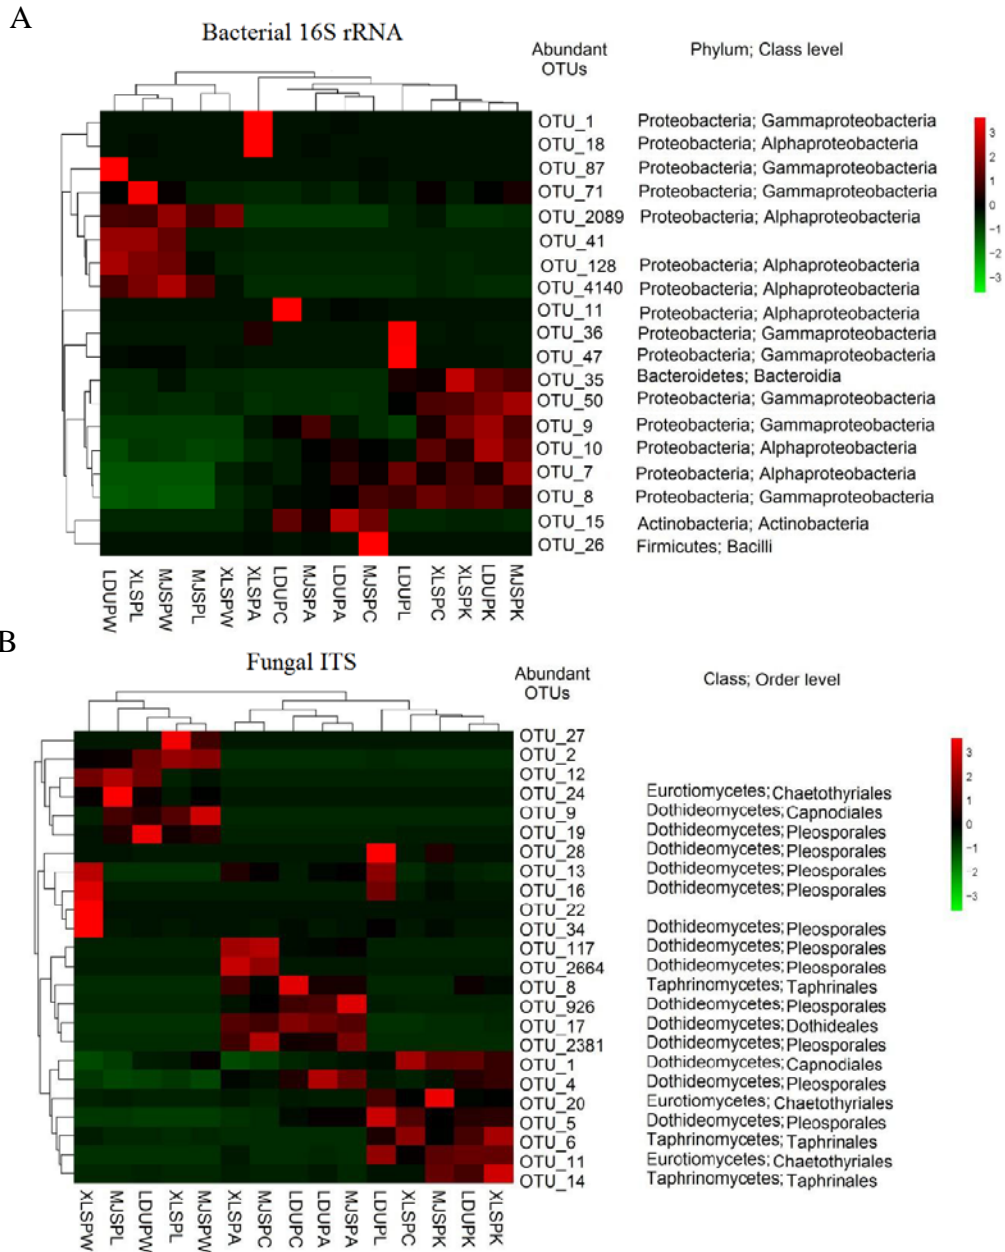

Supplement: peerj-07-7376-s008.pdf [file peerj-07-7376-s008.pdf]
