# Supplementary material for: Microbial taxonomical composition in spruce phyllosphere, but not community functional structure, varies by geographical location
Source: PubMed Central journal article supplement (PMC6644631; doi:10.7717/peerj.7376), 2019-07-19

Supplemental Figure 2. Bacterial classes (A) and fungal orders (B) identified as indicator taxa significantly ( $q < 0.05$ ) associated with different locations. The size of each circle defines the association strength (indicator value) of a particular taxa with the different location, such as 0-0.25: not characteristic; 0.25-0.5: weakly characteristic; 0.5-0.75: characteristic; 0.75-1.0: strongly characteristic. The bars represent the cumulative relative abundance of each indicator taxa in all the samples

A

### Bacterial 16S rRNA

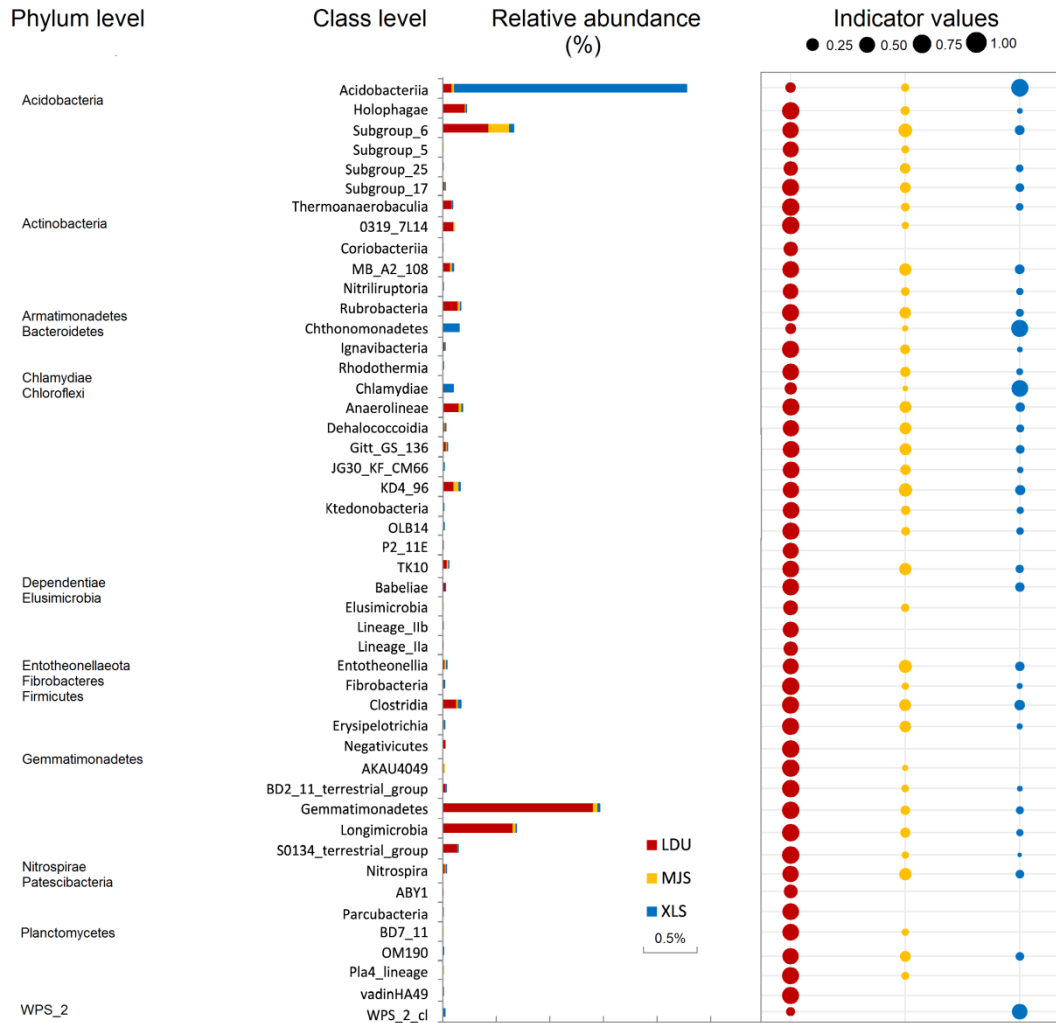

B

### Fungal ITS

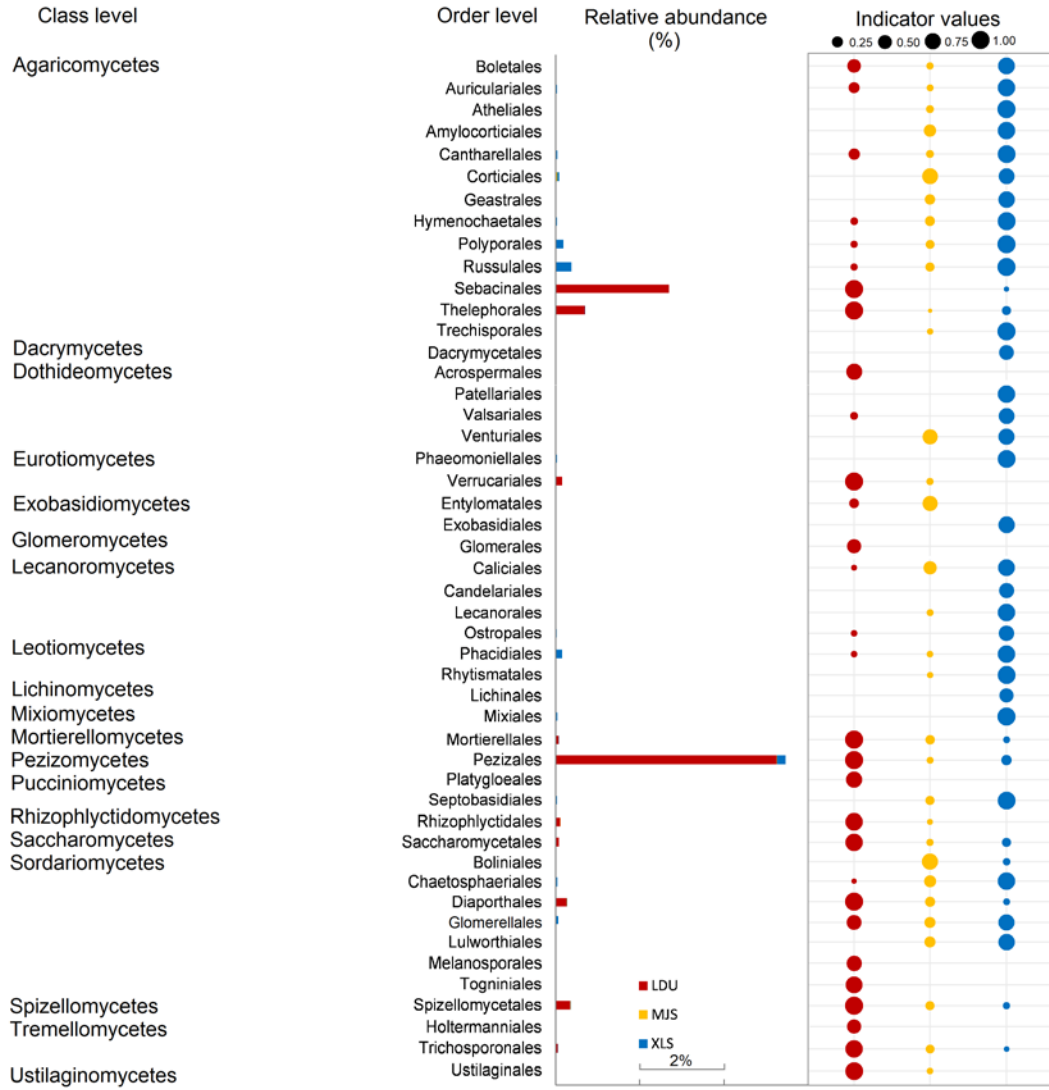

Supplement: peerj-07-7376-s009.pdf [file peerj-07-7376-s009.pdf]
