# Supplementary material for: Microbial taxonomical composition in spruce phyllosphere, but not community functional structure, varies by geographical location
Source: PeerJ. 2019 Jul 19;7:e7376. doi: 10.7717/peerj.7376 (PMC6644631; doi:10.7717/peerj.7376)
Supplement: Supplemental Information 1 [file peerj-07-7376-s001.xlsx]

## Sheet: Bacterial 16S
OTU ID	LDUPA1	LDUPA2	LDUPA3	LDUPC1	LDUPC2	LDUPC3	LDUPK1	LDUPK2	LDUPK3	LDUPL1	LDUPL2	LDUPL3	LDUPW1	LDUPW2	LDUPW3	MJSPA1	MJSPA2	MJSPA3	MJSPC1	MJSPC2	MJSPC3	MJSPK1	MJSPK2	MJSPK3	MJSPL1	MJSPL2	MJSPL3	MJSPW1	MJSPW2	MJSPW3	XLSPA1	XLSPA2	XLSPA3	XLSPC1	XLSPC2	XLSPC3	XLSPK1	XLSPK2	XLSPK3	XLSPL1	XLSPL2	XLSPL3	XLSPW1	XLSPW2	XLSPW3	taxonomy
OTU_1	21	20	442	14	15	31	382	504	54569	29	18	14	54	24	7	0	1	1	0	18	0	0	0	0	4	12	4	0	1	25	1	1	0	2	53	2	2	3	0	4	6	2	0	2	0	d__Bacteria; p__Proteobacteria; c__Gammaproteobacteria; o__Pseudomonadales; f__Moraxellaceae; g__Acinetobacter
OTU_10	776	2137	1520	406	926	1876	2257	160	237	1901	1573	179	1521	942	636	3426	2209	1597	4860	5321	2589	2894	952	5122	2173	1853	1390	1853	210	1152	815	56	13	365	34	1012	154	153	33	520	270	402	131	276	197	d__Bacteria; p__Proteobacteria; c__Alphaproteobacteria; o__Sphingomonadales; f__Sphingomonadaceae; g__Sphingomonas; s__Sphingomonas_faeni
OTU_100	48	27	14	41	51	64	53	21	19	125	77	16	87	62	28	407	406	661	225	117	872	945	1141	331	229	291	377	425	207	613	335	926	128	109	53	85	109	173	45	89	258	184	71	265	240	d__Bacteria; p__Proteobacteria; c__Gammaproteobacteria; o__Betaproteobacteriales; f__Burkholderiaceae
OTU_1000	2	2	1	0	2	2	3	4	7	14	4	4	5	2	5	0	0	0	0	0	0	0	0	0	1	0	0	0	1	0	0	0	0	0	0	0	0	0	0	0	1	0	0	0	0	d__Bacteria; p__Proteobacteria; c__Alphaproteobacteria; o__Rhizobiales; f__Rhizobiales_Incertae_Sedis; g__Bauldia; s__uncultured_bacterium
OTU_1001	3	6	4	0	6	4	8	5	5	7	5	3	4	3	7	0	0	1	14	1	3	1	1	0	6	0	2	0	1	0	0	3	1	0	3	0	1	0	0	4	0	0	1	0	0	d__Bacteria; p__Actinobacteria; c__Thermoleophilia; o__Solirubrobacterales; f__Solirubrobacteraceae; g__Conexibacter
OTU_1002	1	0	2	1	0	1	3	1	10	4	2	0	1	0	0	0	0	0	2	0	0	0	0	0	0	0	2	0	0	0	0	0	0	0	0	0	0	0	0	0	0	0	0	0	0	d__Bacteria; p__Acidobacteria; c__Blastocatellia_Subgroup_4; o__Blastocatellales; f__Blastocatellaceae
OTU_1003	2	6	1	2	4	1	3	4	8	5	4	0	1	3	0	0	0	0	1	0	0	0	0	0	1	0	0	0	0	0	0	0	0	0	0	0	0	0	0	0	0	0	0	0	0	d__Bacteria
OTU_1004	4	5	3	1	5	3	4	3	6	6	3	1	7	2	0	0	0	0	0	0	0	0	0	0	0	0	0	0	0	0	0	0	0	0	0	0	0	0	0	0	0	0	0	0	0	d__Bacteria; p__Chloroflexi; c__Anaerolineae; o__SBR1031; f__SBR1031_fa; g__SBR1031_ge; s__uncultured_Chloroflexi_bacterium
OTU_1005	0	0	0	1	1	0	2	0	0	0	6	0	1	9	0	0	0	0	0	0	0	0	0	0	0	0	0	0	0	0	0	0	0	0	0	0	0	0	0	0	0	0	0	0	0	Unclassified
OTU_1006	5	1	0	5	1	0	3	1	2	2	0	0	2	1	1	0	0	0	1	0	0	0	0	0	0	0	0	0	0	0	0	0	0	0	0	0	0	0	0	0	10	0	0	0	0	d__Bacteria; p__Actinobacteria; c__Actinobacteria; o__Corynebacteriales; f__Nocardiaceae; g__Nocardia; s__Nocardia_fluminea
OTU_1007	32	22	19	37	58	32	28	39	30	41	56	43	14	10	5	1	4	0	172	18	48	9	4	11	72	39	42	0	18	7	3	6	2	11	3	4	3	6	0	7	5	2	4	3	2	d__Bacteria; p__Actinobacteria; c__Actinobacteria; o__Pseudonocardiales; f__Pseudonocardiaceae; g__Pseudonocardia; s__uncultured_bacterium
OTU_1008	6	25	7	3	29	4	8	16	4	28	38	18	9	7	6	1	0	0	1	0	3	0	0	0	2	0	3	0	0	0	0	0	0	0	0	0	0	0	0	0	0	0	0	0	0	d__Bacteria; p__Proteobacteria; c__Alphaproteobacteria; o__Rhodobacterales; f__Rhodobacteraceae; g__Rubellimicrobium
OTU_1009	0	0	0	1	1	1	5	1	0	4	7	0	0	1	0	4	3	25	2	1	14	11	3	1	0	2	1	0	1	2	15	11	2	2	0	3	3	3	1	10	4	0	22	39	45	d__Bacteria; p__Actinobacteria; c__Thermoleophilia; o__Solirubrobacterales; f__Solirubrobacteraceae
OTU_101	63	124	15	49	216	37	43	37	13	150	153	50	30	18	6	2	0	1	1	1	16	6	1	3	9	5	3	1	0	0	2	3	1	7	3	0	1	0	0	1	4	0	7	4	3	d__Bacteria; p__Proteobacteria; c__Alphaproteobacteria; o__Acetobacterales; f__Acetobacteraceae; g__Belnapia; s__Belnapia_rosea
OTU_1010	4	7	3	13	12	6	8	3	3	11	8	1	5	0	1	40	93	22	20	13	60	72	50	12	17	25	17	15	33	80	121	76	39	25	4	18	51	41	21	25	38	45	39	12	48	d__Bacteria; p__Proteobacteria; c__Alphaproteobacteria; o__Sphingomonadales; f__Sphingomonadaceae; g__Sphingomonas
OTU_1011	0	1	1	0	4	1	1	0	0	6	0	0	4	15	2	0	0	0	1	20	0	1	1	7	2	2	0	0	0	0	0	0	0	0	0	0	0	0	0	0	0	0	0	0	0	Unclassified
OTU_1012	0	1	1	1	0	0	2	4	3	1	1	0	1	3	0	0	0	43	0	0	0	1	0	0	0	1	1	0	1	0	0	70	0	0	0	0	1	3	8	2	0	3	7	3	0	d__Bacteria; p__Bacteroidetes; c__Bacteroidia; o__Chitinophagales; f__Chitinophagaceae; g__uncultured
OTU_1013	0	34	0	0	0	0	0	0	0	0	0	0	0	0	0	0	0	0	0	0	0	0	0	0	0	0	0	0	0	0	0	0	0	0	0	0	0	0	0	0	0	0	0	0	0	d__Bacteria; p__Firmicutes; c__Erysipelotrichia; o__Erysipelotrichales; f__Erysipelotrichaceae; g__Faecalibaculum; s__Faecalibaculum_rodentium
OTU_1014	4	4	6	3	5	14	19	7	3	28	15	16	12	7	3	124	73	166	181	162	832	101	30	31	87	91	141	111	128	145	55	37	1	42	40	28	11	23	16	17	63	16	112	103	16	d__Bacteria; p__Proteobacteria; c__Gammaproteobacteria; o__Betaproteobacteriales; f__Burkholderiaceae; g__Massilia
OTU_1015	0	0	0	1	1	1	0	2	0	1	0	0	12	1	0	0	0	2	0	0	1	0	0	0	0	0	0	1	0	0	12	11	11	28	1	0	9	15	1	0	1	3	2	18	9	d__Bacteria; p__Patescibacteria; c__Saccharimonadia; o__Saccharimonadales; f__Saccharimonadales_fa; g__Saccharimonadales_ge
OTU_1016	0	0	0	0	0	0	0	0	0	0	0	0	0	0	0	3	6	22	1	0	20	13	25	3	0	0	7	5	7	5	0	0	0	0	0	0	1	4	0	3	3	0	4	0	5	d__Bacteria; p__Proteobacteria; c__Alphaproteobacteria; o__Acetobacterales; f__Acetobacteraceae; g__Rhodovastum
OTU_1017	4	5	4	4	4	8	9	10	11	7	3	0	4	0	4	0	0	0	6	1	1	0	0	0	2	1	5	0	0	0	0	0	0	0	1	0	0	0	0	0	0	0	0	0	0	d__Bacteria; p__Actinobacteria; c__Thermoleophilia; o__Gaiellales; f__Gaiellaceae; g__Gaiella
OTU_1019	0	0	0	0	0	0	0	0	0	0	4	0	0	0	0	4	1	1	0	5	0	16	10	0	1	0	26	1	0	1	34	12	4	8	11	4	1	5	5	3	1	30	1	0	6	d__Bacteria; p__Proteobacteria; c__Alphaproteobacteria
OTU_1020	1	2	1	1	0	2	1	1	8	5	1	1	2	1	1	0	0	0	0	0	0	0	0	0	0	0	1	0	0	0	0	0	0	0	0	0	0	0	0	0	0	0	0	0	0	d__Bacteria; p__Planctomycetes; c__Planctomycetacia; o__Pirellulales; f__Pirellulaceae; g__uncultured
OTU_1021	1	8	3	0	8	4	0	1	7	4	2	1	4	2	0	0	0	0	1	1	0	0	0	0	0	0	0	0	0	0	0	0	0	0	0	0	0	0	0	0	0	0	0	0	0	d__Bacteria; p__Actinobacteria; c__MB_A2_108; o__MB_A2_108_or; f__MB_A2_108_fa; g__MB_A2_108_ge
OTU_1022	3	6	0	0	4	1	5	3	11	4	0	2	4	0	2	0	0	0	0	0	0	0	0	0	0	0	0	0	0	0	0	0	0	0	0	0	0	0	0	0	0	0	0	0	0	d__Bacteria; p__Actinobacteria; c__MB_A2_108; o__MB_A2_108_or; f__MB_A2_108_fa; g__MB_A2_108_ge
OTU_1023	1	0	3	1	2	5	5	10	13	4	2	5	0	3	1	0	0	0	1	3	1	0	0	0	0	2	5	0	0	0	0	0	0	0	0	0	1	1	0	0	0	0	0	0	0	d__Bacteria; p__Gemmatimonadetes; c__Gemmatimonadetes; o__Gemmatimonadales; f__Gemmatimonadaceae; g__Gemmatimonas
OTU_1025	0	0	0	0	0	0	0	0	0	0	0	0	0	0	0	18	0	50	3	0	19	16	46	1	0	1	54	14	24	102	0	1	0	0	0	0	0	0	0	1	0	0	2	0	0	d__Bacteria; p__Bacteroidetes; c__Bacteroidia; o__Chitinophagales; f__Chitinophagaceae
OTU_1026	5	1	5	0	2	0	1	7	5	3	0	2	5	3	0	0	0	0	0	0	0	0	0	0	0	0	0	0	0	0	0	0	0	0	0	0	0	0	0	0	0	0	0	0	0	d__Bacteria; p__Actinobacteria; c__Acidimicrobiia
OTU_1027	0	0	0	0	2	2	1	4	6	2	1	3	1	1	0	0	0	0	2	0	0	0	0	0	1	1	1	0	0	0	0	0	0	0	0	0	0	0	0	0	0	0	0	0	0	d__Bacteria; p__Gemmatimonadetes; c__Longimicrobia; o__Longimicrobiales; f__Longimicrobiaceae; g__Longimicrobiaceae_ge
OTU_1028	0	0	0	0	0	0	0	0	1	1	0	0	1	0	0	2	0	0	284	14	37	17	3	3	49	28	20	0	23	14	3	0	1	27	11	0	2	2	0	10	6	1	0	0	1	d__Bacteria; p__Actinobacteria; c__Actinobacteria; o__Propionibacteriales; f__Propionibacteriaceae; g__Microlunatus; s__uncultured_bacterium
OTU_1029	56	75	49	38	117	53	20	37	24	88	68	59	42	24	10	7	2	8	3	9	30	0	9	8	21	8	18	2	13	19	0	0	0	2	0	0	0	2	0	1	0	0	19	4	3	d__Bacteria; p__Actinobacteria; c__Actinobacteria; o__Frankiales; f__uncultured; g__uncultured_ge
OTU_103	3	12	13	2	0	1	4	0	24	9	10	671	3	1	15	0	0	0	1	0	1	1	0	0	0	0	3	0	0	0	6	0	0	0	1	0	0	1	0	1	2	1	0	0	0	d__Bacteria; p__Firmicutes; c__Bacilli; o__Bacillales; f__Bacillaceae; g__Bacillus
OTU_1030	3	2	1	0	3	0	5	1	4	2	2	1	0	2	0	0	0	0	0	0	1	0	0	0	0	0	0	0	0	0	0	0	0	0	0	0	0	0	0	0	0	0	0	0	0	d__Bacteria
OTU_1031	1	5	3	0	3	4	1	5	11	5	1	0	7	0	1	0	0	0	6	1	0	0	0	0	0	1	0	0	0	0	2	0	0	0	5	0	0	0	0	0	0	0	0	0	0	d__Bacteria; p__Planctomycetes; c__Phycisphaerae; o__Tepidisphaerales; f__WD2101_soil_group; g__WD2101_soil_group_ge; s__uncultured_soil_bacterium
OTU_1033	0	1	0	14	0	0	2	0	0	6	3	4	3	6	0	0	0	0	0	0	0	0	0	0	0	0	0	0	0	0	0	0	0	0	0	0	0	0	0	0	0	0	0	0	0	Unclassified
OTU_1036	2	5	0	0	3	0	2	1	8	4	2	0	3	0	3	0	0	0	0	0	0	1	0	0	0	0	1	0	0	0	0	0	0	0	7	0	2	0	0	0	1	0	0	0	0	d__Bacteria; p__Chloroflexi; c__Chloroflexia; o__Chloroflexales; f__Roseiflexaceae; g__uncultured
OTU_1037	1	3	2	0	3	1	3	2	4	2	2	0	0	2	2	0	0	0	5	0	0	0	0	0	1	2	1	0	0	0	0	0	0	0	3	0	0	0	0	0	0	0	0	0	0	d__Bacteria; p__Actinobacteria; c__MB_A2_108; o__MB_A2_108_or; f__MB_A2_108_fa; g__MB_A2_108_ge
OTU_1038	2	1	0	2	8	0	0	13	1	3	1	3	1	1	0	0	0	0	0	0	0	0	0	0	0	0	0	0	0	0	0	0	0	0	0	0	0	0	0	0	0	0	0	0	0	d__Bacteria; p__Bacteroidetes; c__Bacteroidia; o__Cytophagales; f__Hymenobacteraceae; g__Adhaeribacter; s__uncultured_bacterium
OTU_1039	3	1	3	2	1	2	0	3	9	2	3	0	4	0	0	0	0	0	1	0	0	0	1	0	0	0	2	0	0	0	0	0	0	0	0	0	0	0	0	0	0	0	0	0	0	d__Bacteria; p__Planctomycetes; c__Planctomycetacia; o__Pirellulales; f__Pirellulaceae; g__uncultured
OTU_104	82	144	86	42	68	48	37	5	9	232	137	41	101	155	8	2	1	0	3	2	15	0	0	0	1	4	13	7	0	0	0	0	0	0	0	0	0	0	0	0	0	0	0	0	0	d__Bacteria; p__Bacteroidetes; c__Bacteroidia; o__Cytophagales; f__Hymenobacteraceae; g__Hymenobacter; s__Hymenobacter_wooponensis
OTU_1040	0	0	0	0	0	0	0	0	0	0	0	0	0	0	0	5	1	8	1	2	1	18	0	1	46	1	27	5	5	2	0	0	0	0	0	0	0	1	0	0	0	0	0	2	0	Unclassified
OTU_1041	0	0	0	0	0	0	0	0	0	0	0	0	0	0	0	0	0	0	0	0	0	0	0	0	0	0	0	0	0	0	0	11	112	1	0	0	0	0	0	0	0	0	0	0	6	Unclassified
OTU_1042	17	43	7	4	60	11	7	9	5	73	9	12	55	20	1	7	0	22	0	4	46	23	62	28	7	14	58	119	58	56	0	2	1	3	1	2	3	3	5	0	2	1	3	16	41	d__Bacteria; p__FBP; c__FBP_cl; o__FBP_or; f__FBP_fa; g__FBP_ge
OTU_1043	2	1	1	0	3	0	6	5	7	3	5	0	6	1	2	0	0	0	0	0	0	0	0	0	0	0	0	0	0	0	0	0	0	0	0	0	0	0	0	0	0	0	0	0	0	d__Bacteria; p__Verrucomicrobia; c__Verrucomicrobiae; o__Pedosphaerales; f__Pedosphaeraceae; g__Pedosphaeraceae_ge
OTU_1045	1	4	3	1	0	3	6	0	8	1	0	0	3	1	0	0	0	0	0	0	0	0	0	0	0	0	0	0	0	0	0	0	0	0	0	0	0	0	0	0	0	0	0	0	0	d__Bacteria; p__Planctomycetes; c__Phycisphaerae; o__Tepidisphaerales; f__WD2101_soil_group; g__WD2101_soil_group_ge
OTU_1046	4	1	0	1	0	5	0	0	0	0	0	0	2	1	0	1	0	2	0	1	5	4	0	0	0	0	19	0	0	2	0	0	0	0	0	0	0	0	0	0	0	0	0	0	0	d__Bacteria; p__FBP; c__FBP_cl; o__FBP_or; f__FBP_fa; g__FBP_ge; s__uncultured_bacterium
OTU_1047	0	1	2	0	0	2	13	1	2	0	1	0	0	0	0	0	0	0	34	6	9	4	1	2	6	4	10	0	0	0	0	0	0	0	1	0	0	0	0	0	0	0	0	0	0	d__Bacteria; p__Proteobacteria; c__Alphaproteobacteria; o__Rhodospirillales; f__Rhodopirillaceae; g__Defluviicoccus; s__uncultured_Defluviicoccus_sp.
OTU_1048	0	0	0	0	0	0	0	0	1	0	0	0	0	0	0	10	1	0	1	84	2	3	3	19	30	8	20	0	0	0	0	0	0	0	0	0	0	0	0	0	0	0	0	0	0	Unclassified
OTU_1049	58	57	31	45	77	56	104	145	28	127	81	62	66	28	22	3	1	3	2	2	3	1	0	1	2	0	2	0	1	0	5	4	2	2	116	0	1	1	0	0	11	0	0	1	6	d__Bacteria; p__Actinobacteria; c__Actinobacteria; o__Micrococcales; f__Microbacteriaceae; g__Leucobacter
OTU_105	66	64	37	31	69	61	30	2	3	203	68	14	126	28	31	4	9	199	49	14	308	234	15	6	20	8	37	56	41	146	2	0	0	2	0	0	3	1	0	5	13	0	2	19	13	d__Bacteria; p__Bacteroidetes; c__Bacteroidia; o__Cytophagales; f__Hymenobacteraceae; g__Hymenobacter
OTU_1050	0	0	0	0	0	0	0	0	0	0	0	0	0	0	0	0	0	0	0	0	0	0	0	0	0	0	0	0	0	0	0	0	0	22	4	24	1	0	0	0	0	13	0	27	80	Unclassified
OTU_1051	1	7	5	3	3	4	1	4	8	3	4	6	9	4	0	0	0	0	8	0	3	0	0	0	1	0	4	0	0	0	0	0	0	0	2	0	0	0	0	0	0	0	0	0	0	d__Bacteria; p__Chloroflexi; c__Chloroflexia; o__Chloroflexales; f__Roseiflexaceae; g__uncultured; s__uncultured_soil_bacterium
OTU_1052	152	107	83	84	86	106	105	38	35	236	118	44	200	101	35	60	173	130	31	35	336	113	77	26	25	42	162	31	42	91	93	121	83	43	12	29	33	37	20	56	85	61	124	69	129	d__Bacteria; p__Proteobacteria; c__Alphaproteobacteria; o__Sphingomonadales; f__Sphingomonadaceae; g__Sphingomonas
OTU_1053	0	0	0	0	0	0	0	0	0	0	0	0	0	0	0	0	0	0	0	0	0	0	0	0	0	0	0	0	0	0	15	45	17	2	5	1	0	1	20	36	39	5	0	0	0	d__Bacteria; p__Proteobacteria; c__Alphaproteobacteria; o__Micavibrionales; f__Micavibrionaceae
OTU_1054	1	1	3	0	0	1	1	0	0	3	3	0	2	1	0	0	0	0	1	2	0	0	0	0	0	0	0	0	0	0	0	0	0	0	0	0	0	0	0	0	1	0	0	0	0	d__Bacteria; p__Planctomycetes; c__Planctomycetacia; o__Pirellulales; f__Pirellulaceae; g__Blastopirellula; s__metagenome
OTU_1055	0	0	0	0	0	0	0	0	0	1	0	1	0	16	1	0	0	0	0	0	0	0	0	0	0	0	0	0	0	0	0	0	0	0	0	0	0	0	0	0	0	0	0	0	0	Unclassified
OTU_1056	1	1	1	11	0	0	1	3	4	0	0	3	0	1	0	0	0	7	2	1	35	1	0	0	1	0	1	0	0	1	1	6	0	0	0	0	0	0	0	2	2	1	10	0	1	d__Bacteria; p__Proteobacteria; c__Alphaproteobacteria; o__Caulobacterales; f__Caulobacteraceae; g__Caulobacter; s__metagenome
OTU_1057	0	3	2	36	4	1	2	0	0	3	6	1	3	4	0	3	0	0	0	6	1	0	1	0	0	0	0	0	0	0	0	0	0	25	0	5	2	0	1	0	4	0	0	0	0	d__Bacteria; p__Bacteroidetes; c__Bacteroidia; o__Cytophagales; f__Spirosomaceae; g__Dyadobacter; s__uncultured_bacterium
OTU_1058	2	3	3	1	1	4	11	8	11	4	2	0	3	1	1	0	0	0	4	0	0	0	0	0	0	0	1	0	0	0	0	0	0	0	0	0	0	0	0	2	0	0	0	0	0	d__Bacteria; p__Chloroflexi; c__Anaerolineae; o__SBR1031; f__SBR1031_fa; g__SBR1031_ge; s__uncultured_soil_bacterium
OTU_1059	1	5	11	1	2	1	3	5	9	2	4	2	3	0	0	0	0	0	2	0	0	0	0	0	0	0	0	0	0	0	0	0	0	0	1	0	0	0	0	0	0	0	0	0	0	d__Bacteria; p__Actinobacteria; c__Acidimicrobiia; o__IMCC26256; f__IMCC26256_fa; g__IMCC26256_ge
OTU_106	6	19	9	43	72	76	120	23	9	55	31	13	200	107	122	139	88	202	20	122	83	26	8	21	25	43	44	32	56	102	4	4	0	50	1	31	14	6	3	25	32	40	39	449	112	d__Bacteria; p__Proteobacteria; c__Alphaproteobacteria; o__Rhizobiales; f__Rhizobiaceae; g__Aureimonas; s__uncultured_bacterium
OTU_1060	1	9	1	1	1	3	3	1	11	5	3	4	3	3	4	0	0	0	4	2	0	0	0	0	3	0	0	0	0	0	0	0	0	0	0	0	0	0	0	0	0	0	0	0	0	d__Bacteria; p__Gemmatimonadetes; c__Longimicrobia; o__Longimicrobiales; f__Longimicrobiaceae; g__Longimicrobiaceae_ge; s__uncultured_bacterium
OTU_1061	2	0	2	2	0	1	11	2	3	7	0	2	6	1	1	0	0	0	15	0	0	1	0	0	3	2	0	0	0	0	1	0	0	0	2	0	1	0	0	0	0	1	0	0	1	d__Bacteria; p__Actinobacteria; c__Acidimicrobiia; o__IMCC26256; f__IMCC26256_fa; g__IMCC26256_ge; s__metagenome
OTU_1062	0	0	0	0	0	0	0	0	0	0	0	0	0	0	0	0	0	0	0	0	0	0	0	0	0	0	0	0	0	0	43	31	25	3	8	1	4	4	2	15	8	7	0	0	0	d__Bacteria; p__Proteobacteria; c__Alphaproteobacteria; o__Elsterales; f__uncultured; g__uncultured_ge
OTU_1063	1	0	8	0	0	9	2	3	2	1	3	0	2	0	0	0	0	0	6	0	0	1	0	0	0	0	1	0	0	0	0	0	0	0	6	0	0	0	0	0	0	0	0	0	0	d__Bacteria; p__Nitrospirae; c__Nitrospira; o__Nitrospirales; f__Nitrospiraceae; g__Nitrospira
OTU_1064	0	0	0	0	0	0	0	0	0	0	16	0	0	0	0	0	0	0	0	0	0	0	0	0	0	0	0	0	0	0	0	0	0	0	0	0	0	0	0	0	0	0	0	0	0	Unclassified
OTU_1066	0	1	6	0	1	2	5	3	5	5	0	2	5	1	4	1	0	0	37	1	1	2	0	0	10	1	4	0	0	1	0	0	0	0	2	0	0	0	0	0	0	1	0	0	0	d__Bacteria; p__Actinobacteria; c__Acidimicrobiia; o__Microtrichales; f__Iamiaceae; g__Iamia
OTU_1067	6	1	2	3	2	1	5	6	9	8	2	5	1	1	1	0	0	0	0	0	0	0	0	0	0	0	0	0	0	0	0	0	0	0	0	0	0	0	0	0	0	0	0	0	0	d__Bacteria; p__Actinobacteria; c__Actinobacteria; o__Pseudonocardiales; f__Pseudonocardiaceae; g__Amycolatopsis
OTU_1068	1	0	2	0	0	0	2	2	5	4	0	0	5	0	0	0	0	0	0	0	0	0	0	0	0	0	0	0	0	0	0	0	0	0	0	0	0	0	0	0	0	0	0	0	0	d__Bacteria; p__Planctomycetes; c__Phycisphaerae; o__Tepidisphaerales; f__WD2101_soil_group; g__WD2101_soil_group_ge
OTU_1069	1	0	0	6	3	0	2	6	0	7	5	8	3	0	0	0	0	0	0	0	2	0	0	0	3	0	0	0	0	0	0	0	0	0	0	0	1	0	0	0	1	0	0	0	0	d__Bacteria; p__Chloroflexi; c__Chloroflexia
OTU_107	1	11	2	14	7	6	9	1	1	5	50	12	9	10	6	1564	627	64	15	82	552	537	277	358	174	110	410	458	93	99	14	9	18	61	26	118	57	150	1	84	75	79	4	207	224	d__Bacteria
OTU_1070	0	0	0	0	0	0	0	0	0	0	0	0	0	0	0	4	0	18	3	2	8	41	8	5	2	7	35	4	7	12	0	0	0	0	0	0	0	0	0	0	0	0	1	1	0	d__Bacteria; p__Deinococcus_Thermus; c__Deinococci; o__Deinococcales; f__Deinococcaceae; g__Deinococcus
OTU_1071	0	0	0	2	0	0	0	0	0	0	0	0	0	0	0	0	0	31	1	0	5	2	0	1	1	0	0	0	0	1	0	2	1	48	0	8	5	0	13	0	69	6	7	57	1	d__Bacteria; p__Bacteroidetes; c__Bacteroidia; o__Sphingobacteriales; f__Sphingobacteriaceae; g__Mucilaginibacter
OTU_1072	0	0	0	0	0	0	0	0	0	0	0	0	0	0	0	15	7	10	0	6	37	12	28	2	0	110	4	38	13	25	5	11	1	0	0	11	0	1	1	2	1	6	4	22	17	d__Bacteria; p__Bacteroidetes; c__Bacteroidia; o__Cytophagales; f__Hymenobacteraceae; g__Hymenobacter
OTU_1073	0	0	0	5	6	2	1	0	0	0	0	0	1	1	0	0	0	0	0	0	0	0	0	0	3	0	3	0	0	0	0	0	0	0	0	0	2	4	1	0	2	0	1	2	4	d__Bacteria; p__Proteobacteria; c__Gammaproteobacteria
OTU_1074	0	0	0	0	0	0	0	0	0	0	0	0	0	0	0	0	0	0	0	0	12	0	0	0	99	0	0	0	0	0	0	0	0	0	0	0	0	0	0	0	0	0	0	0	0	Unclassified
OTU_1075	0	0	1	0	1	1	0	3	0	1	0	0	0	0	0	3	2	36	10	1	23	16	13	1	20	7	9	11	19	19	52	46	21	33	0	1	8	10	2	6	5	5	0	1	2	d__Bacteria; p__Actinobacteria; c__Actinobacteria; o__Propionibacteriales; f__Propionibacteriaceae; g__uncultured; s__uncultured_endolithic_bacterium
OTU_1076	1	1	2	0	1	3	9	2	5	7	1	0	5	1	1	0	0	0	45	1	2	1	0	0	4	0	5	0	0	0	0	1	0	0	1	1	0	0	0	0	1	2	0	0	0	d__Bacteria; p__Actinobacteria; c__Acidimicrobiia; o__Microtrichales; f__Ilumatobacteraceae
OTU_1077	0	0	0	0	0	0	2	12	9	0	1	11	0	0	8	0	0	0	0	0	0	0	0	0	0	0	0	0	0	0	0	0	0	0	2	1	0	0	0	2	0	1	0	0	0	d__Bacteria; p__Bacteroidetes; c__Bacteroidia; o__Cytophagales; f__Amoebophilaceae; g__Candidatus_Cardinium
OTU_1079	0	0	0	1	6	2	0	3	0	0	1	0	0	0	1	0	0	0	0	0	0	14	1	0	0	0	4	0	0	0	1	5	0	0	0	0	0	0	0	0	0	0	0	0	1	d__Bacteria; p__Patescibacteria; c__Saccharimonadia; o__Saccharimonadales; f__Saccharimonadales_fa; g__Saccharimonadales_ge
OTU_108	5	10	13	2	28	9	8	4	3	36	7	5	4	4	2	447	148	727	70	51	1407	877	1605	283	170	315	210	820	675	1156	457	502	381	192	7	43	77	50	62	108	90	121	88	139	159	d__Bacteria; p__Actinobacteria; c__Actinobacteria; o__Propionibacteriales; f__Propionibacteriaceae; g__Friedmanniella
OTU_1080	2	3	2	0	5	1	4	3	2	3	0	0	2	3	0	0	0	0	64	5	4	0	1	0	6	3	6	0	0	2	1	0	0	0	10	1	1	0	0	1	0	0	0	0	0	d__Bacteria; p__Actinobacteria; c__Thermoleophilia; o__Gaiellales; f__Gaiellaceae; g__Gaiella
OTU_1081	0	0	0	0	0	0	0	0	0	0	0	0	0	0	0	17	2	1	2	5	1	0	0	2	1	10	0	0	0	0	2	1	3	2	0	3	20	5	0	42	3	5	0	2	0	d__Bacteria; p__Actinobacteria; c__Actinobacteria; o__Propionibacteriales; f__Propionibacteriaceae; g__Cutibacterium
OTU_1082	1	1	4	1	2	0	3	4	9	2	3	1	2	0	2	1	0	0	11	0	3	3	1	0	0	0	1	0	0	0	2	1	2	0	14	0	0	0	0	1	0	1	0	0	1	d__Bacteria; p__Actinobacteria; c__Actinobacteria; o__Propionibacteriales; f__Nocardioidaceae; g__Nocardioides
OTU_1083	2	1	2	2	0	2	2	5	4	4	2	2	1	1	2	0	0	0	0	1	0	0	0	0	0	0	0	0	0	0	0	0	0	0	0	0	0	0	0	0	0	0	0	0	0	d__Bacteria; p__Proteobacteria; c__Alphaproteobacteria; o__uncultured; f__uncultured_fa; g__uncultured_ge; s__uncultured_forest_soil_bacterium
OTU_1084	0	0	2	2	0	2	0	3	6	2	2	1	3	1	0	0	0	0	0	0	0	0	0	0	0	0	0	0	0	0	2	0	0	0	0	0	0	0	0	0	0	0	0	0	0	d__Bacteria; p__Chloroflexi; c__Chloroflexia; o__Chloroflexales; f__Roseiflexaceae; g__uncultured; s__uncultured_Chloroflexi_bacterium
OTU_1085	3	5	0	4	5	1	2	10	5	3	1	4	0	1	0	0	0	0	0	0	0	0	1	0	0	0	0	0	0	0	0	0	0	0	0	0	0	0	0	0	0	0	0	0	0	d__Bacteria; p__Actinobacteria; c__Acidimicrobiia; o__uncultured; f__uncultured_fa; g__uncultured_ge; s__uncultured_bacterium
OTU_1086	0	2	1	1	1	1	2	3	6	2	4	2	2	0	1	0	0	0	0	0	0	0	0	0	0	0	0	0	0	0	0	0	0	0	0	0	0	0	0	0	0	0	0	0	0	d__Bacteria; p__Proteobacteria; c__Gammaproteobacteria; o__Methylococcales; f__Methylococcaceae; g__uncultured
OTU_1087	1	1	0	2	1	1	3	1	4	2	0	0	1	0	1	0	0	0	0	0	0	0	0	0	0	0	0	0	0	0	0	0	0	0	0	0	0	0	0	0	0	0	0	0	0	d__Bacteria; p__Planctomycetes; c__vadinHA49; o__vadinHA49_or; f__vadinHA49_fa; g__vadinHA49_ge
OTU_1088	0	2	0	0	1	5	0	0	0	11	0	1	7	0	0	0	0	0	1	0	2	0	0	1	4	2	3	0	0	0	0	0	0	0	0	0	0	0	0	0	2	0	0	0	0	d__Bacteria; p__Actinobacteria; c__Actinobacteria; o__Micrococcales; f__Intrasporangiaceae; g__Aquipuribacter; s__Aquipuribacter_hungaricus
OTU_1089	1	2	2	1	1	4	2	3	2	0	0	2	1	3	1	0	0	0	0	0	0	0	0	0	1	2	1	0	0	0	0	0	0	0	0	0	0	0	0	0	0	0	0	0	0	d__Bacteria; p__Proteobacteria; c__Alphaproteobacteria; o__Caulobacterales; f__Caulobacteraceae; g__PMMR1; s__uncultured_endolithic_bacterium
OTU_109	0	0	0	0	0	0	0	0	0	0	0	0	0	0	0	1	0	0	0	0	1	0	1	0	0	1	0	0	0	0	586	655	154	738	306	592	402	482	71	773	1943	1034	3	1	2	d__Bacteria; p__Proteobacteria; c__Alphaproteobacteria; o__Sphingomonadales; f__Sphingomonadaceae; g__Sphingomonas
OTU_1090	0	0	0	0	0	0	0	0	0	0	0	0	0	0	0	0	0	0	0	0	1	0	0	0	0	0	0	0	0	0	30	8	55	0	0	0	3	0	11	2	4	5	2	0	0	d__Bacteria; p__Proteobacteria; c__Alphaproteobacteria; o__Caulobacterales; f__Caulobacteraceae
OTU_1091	39	48	53	48	27	35	60	45	98	61	30	66	34	16	32	8	2	298	116	17	78	21	7	3	10	17	3	4	11	26	131	434	55	23	27	26	50	55	45	51	67	32	129	160	179	d__Bacteria; p__Proteobacteria; c__Gammaproteobacteria; o__Betaproteobacteriales; f__Burkholderiaceae
OTU_1092	0	0	0	0	0	0	0	0	0	0	0	0	0	0	0	0	0	0	0	0	0	0	0	0	0	0	0	0	0	0	1	71	9	0	0	0	2	0	0	7	11	0	0	0	0	d__Bacteria; p__Proteobacteria; c__Alphaproteobacteria; o__Acetobacterales; f__Acetobacteraceae
OTU_1093	2	2	3	0	1	0	6	0	6	3	2	2	1	3	2	0	0	0	3	1	0	0	0	0	0	0	0	1	0	0	0	0	0	0	0	0	0	0	0	0	0	0	0	0	0	d__Bacteria; p__Proteobacteria; c__Deltaproteobacteria; o__Myxococcales; f__Sandaracinaceae; g__uncultured
OTU_1094	0	1	0	0	2	0	3	3	6	1	1	0	1	1	0	0	0	0	0	1	0	1	0	0	2	0	0	0	0	0	0	0	0	0	0	0	0	0	0	0	0	0	0	0	0	d__Bacteria; p__Chloroflexi; c__Dehalococcoidia; o__S085; f__S085_fa; g__S085_ge; s__metagenome
OTU_1095	4	3	4	1	2	3	2	7	12	12	1	5	3	0	2	0	0	0	7	4	0	1	0	0	1	1	1	0	0	0	1	0	0	0	0	0	0	0	0	0	0	0	0	0	0	d__Bacteria; p__Verrucomicrobia; c__Verrucomicrobiae; o__Opitutales; f__Opitutaceae; g__Opitutus
OTU_1096	0	0	0	0	0	0	0	0	0	0	0	0	0	0	0	0	0	0	0	0	1	0	0	0	0	0	0	0	0	0	1	2	0	0	0	1	16	9	13	0	1	0	20	2	80	d__Bacteria; p__Bacteroidetes; c__Bacteroidia; o__Chitinophagales; f__Chitinophagaceae
OTU_1097	0	0	0	0	0	0	0	0	0	0	0	0	0	0	0	2	19	24	0	2	5	1	0	0	0	0	0	7	1	5	1	0	0	12	3	5	2	1	3	2	35	6	0	0	4	d__Bacteria; p__Bacteroidetes; c__Bacteroidia; o__Cytophagales; f__Spirosomaceae; g__Spirosoma
OTU_1098	0	3	2	1	0	1	3	4	3	4	1	3	1	2	0	0	0	0	3	0	0	0	0	0	0	0	0	0	0	0	0	0	0	0	0	0	0	0	0	0	0	0	0	0	0	d__Bacteria; p__Proteobacteria; c__Deltaproteobacteria; o__Myxococcales; f__Phaselicystidaceae; g__Phaselicystis
OTU_1099	5	1	4	1	0	1	0	1	12	7	4	0	0	0	0	0	0	0	1	0	0	0	0	0	0	0	0	0	0	0	0	0	0	0	0	0	0	0	0	0	0	0	0	0	0	d__Bacteria; p__Bacteroidetes; c__Bacteroidia; o__Chitinophagales; f__Chitinophagaceae; g__Chitinophaga
OTU_11	137	222	167	16	8	6	43	17	27	249	130	12085	22	12	197	1	0	1	1	5	7	0	0	1	13	11	5	0	2	0	1	0	0	0	73	2	0	1	0	1	1	0	0	1	1	d__Bacteria; p__Proteobacteria; c__Alphaproteobacteria; o__Rhodobacterales; f__Rhodobacteraceae; g__Paracoccus
OTU_110	34	34	19	117	75	51	180	11	25	140	47	36	93	157	32	135	179	1062	47	59	751	137	125	18	89	30	251	24	90	149	56	784	36	108	5	77	43	30	57	102	220	57	521	658	798	d__Bacteria; p__Proteobacteria; c__Alphaproteobacteria; o__Sphingomonadales; f__Sphingomonadaceae; g__Sphingomonas
OTU_1100	0	6	1	0	2	2	3	1	4	4	0	0	2	2	1	0	0	0	0	0	0	0	0	0	0	0	0	0	0	0	0	0	0	0	0	0	0	0	0	0	0	0	0	0	0	d__Bacteria; p__Gemmatimonadetes; c__Gemmatimonadetes; o__Gemmatimonadales; f__Gemmatimonadaceae
OTU_1101	0	0	0	0	0	0	0	0	0	0	0	0	0	0	0	2	5	1	10	57	1	13	0	30	6	8	1	1	0	3	0	1	0	1	0	0	0	0	0	0	0	1	0	1	0	Unclassified
OTU_1102	0	0	0	0	0	0	0	0	0	0	1	0	0	0	0	37	0	13	0	0	3	2	2	0	0	0	1	0	1	1	1	0	2	0	0	2	4	1	0	7	1	0	59	39	2	d__Bacteria; p__Planctomycetes; c__Planctomycetacia; o__Isosphaerales; f__Isosphaeraceae; g__Singulisphaera
OTU_1103	2	1	2	1	1	2	0	6	19	0	1	0	0	0	1	0	0	0	0	0	0	0	0	0	0	0	0	0	0	0	0	0	0	0	0	0	0	0	0	0	0	0	0	0	0	d__Bacteria; p__Firmicutes; c__Clostridia; o__Clostridiales; f__Lachnospiraceae; g__Lachnospira; s__uncultured_bacterium
OTU_1105	0	2	13	0	0	1	0	0	1	2	0	0	5	1	0	0	0	0	0	1	0	2	0	0	1	0	0	0	0	0	0	0	0	0	0	0	0	0	0	0	0	0	0	0	0	d__Bacteria
OTU_1106	0	2	4	0	2	2	1	2	8	3	1	1	1	0	1	0	0	0	0	0	0	0	0	0	0	0	0	0	0	0	0	0	0	0	0	0	0	0	0	0	0	0	0	0	0	d__Bacteria; p__Planctomycetes
OTU_1107	0	0	0	9	3	3	0	1	1	1	0	6	0	1	0	3	2	1	0	2	3	3	1	1	3	0	1	0	0	2	0	3	0	4	0	1	1	3	0	2	5	0	0	0	5	d__Bacteria
OTU_1108	2	6	0	1	1	1	1	3	3	0	2	3	1	0	1	0	0	0	0	0	0	0	0	0	0	0	1	0	0	0	0	0	0	0	0	0	0	0	0	0	0	0	0	0	0	d__Bacteria; p__Proteobacteria; c__Alphaproteobacteria; o__Tistrellales; f__Geminicoccaceae; g__uncultured; s__uncultured_bacterium
OTU_111	30	71	22	34	278	33	11	6	21	52	97	34	41	19	1	14	3	6	1	7	61	28	98	20	5	3	25	55	33	34	0	4	0	1	0	1	3	1	2	0	0	0	4	105	65	d__Bacteria; p__FBP; c__FBP_cl; o__FBP_or; f__FBP_fa; g__FBP_ge; s__uncultured_endolithic_bacterium
OTU_1110	0	0	0	0	0	0	0	0	0	0	0	0	0	0	0	0	0	0	0	1	0	0	0	0	0	0	2	0	0	0	0	0	0	0	0	0	1	4	0	0	0	0	223	4	0	Unclassified
OTU_1111	5	1	4	2	0	0	19	9	1	1	0	0	0	1	0	0	0	0	0	0	0	0	0	0	0	0	0	0	0	0	0	0	0	0	0	0	0	0	0	0	0	0	0	0	0	d__Bacteria; p__Proteobacteria; c__Gammaproteobacteria; o__Betaproteobacteriales; f__Burkholderiaceae; g__Parasutterella; s__uncultured_bacterium
OTU_1112	0	0	2	0	0	1	0	1	0	15	2	2	1	0	0	0	0	0	1	0	0	0	0	0	0	0	0	0	0	0	0	0	0	0	0	0	0	0	0	0	0	0	0	0	0	Unclassified
OTU_1113	6	1	0	1	4	0	10	0	0	9	7	0	2	1	0	0	0	0	0	0	0	0	0	0	0	0	0	0	0	0	0	0	0	0	0	0	0	0	0	0	0	0	0	0	0	Unclassified
OTU_1114	1	1	1	1	1	2	0	1	3	7	1	1	4	1	0	0	0	0	1	0	1	0	0	0	0	2	0	0	1	0	0	0	0	0	0	0	0	0	0	0	0	0	0	0	0	d__Bacteria; p__Bacteroidetes; c__Bacteroidia; o__Chitinophagales; f__Chitinophagaceae; g__Segetibacter; s__uncultured_bacterium
OTU_1115	2	0	2	2	1	0	4	1	8	4	2	1	2	1	0	0	0	0	2	0	0	0	0	0	0	1	1	0	0	0	0	0	0	0	0	0	0	0	0	0	0	1	0	0	0	d__Bacteria; p__Acidobacteria; c__Blastocatellia_Subgroup_4; o__DS_100; f__DS_100_fa; g__DS_100_ge; s__uncultured_bacterium
OTU_1117	0	0	0	0	0	0	0	0	0	0	1	0	1	1	0	0	0	0	0	0	0	0	0	0	0	0	0	0	0	1	12	19	7	5	5	2	30	3	3	10	18	3	0	3	5	d__Bacteria; p__Proteobacteria; c__Deltaproteobacteria; o__Oligoflexales; f__0319_6G20; g__0319_6G20_ge; s__metagenome
OTU_1118	0	0	0	0	0	0	0	0	0	0	0	0	0	0	0	0	0	0	0	0	0	0	0	0	0	0	0	0	0	0	89	39	31	5	2	2	4	2	7	5	13	9	9	0	1	d__Bacteria; p__Proteobacteria; c__Alphaproteobacteria; o__Rhizobiales
OTU_1119	3	1	2	0	1	4	5	1	3	0	1	1	2	1	0	0	0	0	0	0	0	0	0	0	0	0	0	0	0	0	0	0	0	0	0	0	0	0	0	0	0	0	0	0	0	d__Bacteria; p__Verrucomicrobia; c__Verrucomicrobiae; o__Pedosphaerales; f__Pedosphaeraceae
OTU_112	10	11	7	27	55	38	20	6	15	375	98	50	21	28	6	26	26	28	3	23	266	234	49	2	2	446	889	284	208	414	0	0	1	0	0	0	1	2	1	1	3	1	15	3	4	d__Bacteria; p__Bacteroidetes; c__Bacteroidia; o__Cytophagales; f__Hymenobacteraceae; g__Hymenobacter; s__uncultured_Hymenobacter_group_bacterium
OTU_1120	0	1	3	0	1	2	2	2	7	4	0	2	2	0	2	0	0	0	2	2	0	0	0	0	0	0	0	0	0	0	0	0	0	0	0	0	0	1	0	0	0	0	0	0	0	d__Bacteria; p__Chloroflexi; c__OLB14; o__OLB14_or; f__OLB14_fa; g__OLB14_ge; s__uncultured_bacterium
OTU_1121	2	2	5	0	2	5	10	5	5	2	1	2	2	4	0	0	0	0	3	0	1	0	0	0	0	1	1	0	0	0	0	0	0	0	0	0	0	0	0	0	0	0	0	0	0	d__Bacteria; p__Verrucomicrobia; c__Verrucomicrobiae; o__Pedosphaerales; f__Pedosphaeraceae; g__Pedosphaeraceae_ge
OTU_1122	1	0	1	0	0	1	6	4	5	1	1	0	1	1	0	0	0	0	8	2	0	1	0	0	1	0	0	0	0	0	0	0	0	0	1	0	0	0	0	0	0	0	0	0	0	d__Bacteria; p__Actinobacteria; c__Actinobacteria; o__Micromonosporales; f__Micromonosporaceae
OTU_1123	0	0	0	0	0	1	0	1	0	0	0	0	0	9	0	12	21	12	1	1	30	10	2	0	2	0	18	0	4	0	1	10	27	18	1	2	3	2	6	0	17	7	1	2	0	d__Bacteria; p__Planctomycetes; c__Phycisphaerae; o__Tepidisphaerales; f__Tepidisphaeraceae; g__Tepidisphaera; s__uncultured_bacterium
OTU_1124	0	1	1	1	1	2	2	1	4	1	0	1	0	0	2	0	0	0	3	0	0	0	0	0	0	1	0	0	0	0	0	0	0	0	0	0	0	0	0	0	0	0	0	0	0	d__Bacteria; p__Chloroflexi; c__JG30_KF_CM66; o__JG30_KF_CM66_or; f__JG30_KF_CM66_fa; g__JG30_KF_CM66_ge
OTU_1125	2	2	2	0	3	3	2	2	10	3	2	3	2	2	0	0	0	0	2	0	0	0	0	0	0	0	0	0	0	0	0	0	0	0	0	0	0	0	0	0	0	0	0	0	0	d__Bacteria; p__Bacteroidetes; c__Bacteroidia; o__Chitinophagales; f__Chitinophagaceae; g__Niastella
OTU_1126	0	1	0	0	0	0	0	0	0	0	0	0	0	12	0	0	0	0	0	0	0	0	0	0	0	0	0	0	0	0	0	0	0	0	0	0	0	0	0	0	0	0	0	0	0	Unclassified
OTU_1128	0	1	0	0	0	0	0	0	0	0	0	0	0	0	0	0	0	1	0	0	0	0	0	0	0	0	0	0	0	14	0	15	0	2	0	0	1	1	1	0	0	0	0	83	3	d__Bacteria; p__Proteobacteria; c__Gammaproteobacteria
OTU_113	64	131	87	16	207	70	174	3	18	257	37	4	63	110	37	19	10	23	5	8	65	49	51	50	6	42	54	76	25	73	29	29	126	30	6	0	11	34	18	8	36	28	14	99	79	d__Bacteria; p__FBP; c__FBP_cl; o__FBP_or; f__FBP_fa; g__FBP_ge; s__uncultured_bacterium
OTU_1130	4	1	0	0	0	2	2	2	4	2	4	0	2	1	1	0	0	0	1	0	0	0	0	0	1	2	0	0	0	0	0	0	0	0	0	0	0	0	0	0	0	0	0	0	0	d__Bacteria; p__Planctomycetes; c__Planctomycetacia; o__Gemmatales; f__Gemmataceae; g__uncultured; s__uncultured_soil_bacterium
OTU_1131	3	1	3	1	1	0	5	1	6	3	2	0	7	4	1	0	0	0	0	0	0	0	0	0	0	0	0	0	0	0	0	0	0	0	0	0	0	0	0	0	0	0	0	0	0	d__Bacteria; p__Gemmatimonadetes; c__S0134_terrestrial_group; o__S0134_terrestrial_group_or; f__S0134_terrestrial_group_fa; g__S0134_terrestrial_group_ge
OTU_1132	18	13	5	28	27	1	7	29	11	12	19	32	6	7	7	0	0	0	5	1	0	0	1	1	0	0	0	0	0	1	0	0	1	0	1	0	0	0	0	0	1	0	0	1	0	d__Bacteria; p__Actinobacteria; c__Actinobacteria; o__Micromonosporales; f__Micromonosporaceae; g__Catellatospora; s__Catellatospora_citrea
OTU_1133	2	6	0	0	5	0	4	3	9	9	2	1	2	3	2	0	0	0	8	0	0	0	0	0	0	0	0	0	0	0	0	0	0	0	0	0	0	0	0	8	1	0	0	0	0	d__Bacteria; p__Actinobacteria; c__Actinobacteria; o__Streptosporangiales; f__Thermomonosporaceae; g__Actinocorallia
OTU_1134	0	0	0	1	0	0	0	0	0	0	0	0	0	0	0	1	0	9	0	0	3	1	0	0	0	0	4	0	0	0	30	24	20	0	1	1	4	13	6	18	13	6	27	69	135	d__Bacteria; p__Bacteroidetes; c__Bacteroidia; o__Chitinophagales; f__Chitinophagaceae
OTU_1135	3	2	2	1	2	1	2	4	10	8	0	0	3	3	3	0	0	0	4	0	0	0	0	0	0	0	0	0	0	0	0	0	0	0	0	0	0	0	0	0	0	0	0	0	0	d__Bacteria; p__Bacteroidetes; c__Bacteroidia; o__Chitinophagales; f__Chitinophagaceae
OTU_1136	0	0	0	0	0	0	0	0	0	0	15	1	0	0	0	0	1	0	0	0	0	0	0	5	1	0	0	0	0	0	0	0	0	0	5	0	0	0	0	0	1	0	0	0	2	Unclassified
OTU_1137	0	0	0	0	0	0	0	0	0	0	0	0	0	0	0	0	0	1	0	0	0	0	0	0	0	0	0	0	0	0	3	0	19	3	0	1	2	2	21	3	7	1	83	55	191	d__Bacteria; p__Verrucomicrobia; c__Verrucomicrobiae; o__Chthoniobacterales
OTU_1139	0	0	0	0	0	0	0	0	0	0	0	0	0	0	0	1	14	49	0	9	5	0	1	0	2	1	5	0	0	0	0	0	0	0	0	0	0	0	0	0	0	0	0	0	0	Unclassified
OTU_114	86	78	30	235	186	86	90	216	106	98	124	160	80	18	34	12	3	112	95	9	430	27	16	11	59	10	51	5	19	70	10	17	0	77	5	24	15	9	3	20	83	3	22	16	13	d__Bacteria; p__Actinobacteria; c__Actinobacteria; o__Micromonosporales; f__Micromonosporaceae
OTU_1140	1	1	6	1	0	6	1	0	1	2	0	1	0	0	0	0	0	0	45	2	0	0	0	0	2	0	2	0	0	0	1	0	0	0	11	1	0	0	0	0	0	0	0	0	0	d__Bacteria; p__Proteobacteria; c__Gammaproteobacteria; o__Steroidobacterales; f__Steroidobacteraceae; g__uncultured
OTU_1141	0	2	2	0	0	3	1	1	6	1	3	1	3	0	1	0	0	0	1	0	0	0	0	0	0	0	0	0	0	0	0	0	0	0	0	0	0	0	0	0	0	0	0	0	0	d__Bacteria; p__Bacteroidetes; c__Bacteroidia; o__Chitinophagales; f__Chitinophagaceae; g__uncultured; s__uncultured_Bacteroidetes_bacterium
OTU_1142	0	0	0	2	0	0	2	0	0	5	1	0	0	7	0	0	0	0	0	7	0	1	0	0	0	0	1	0	0	0	0	0	0	0	0	0	0	0	11	0	0	0	0	0	0	d__Bacteria
OTU_1143	0	0	0	0	1	0	0	1	1	1	0	3	1	0	0	4	5	20	12	0	1	0	0	0	2	3	5	0	1	0	0	0	0	0	3	0	30	44	1	0	1	2	0	2	0	d__Bacteria; p__Proteobacteria; c__Deltaproteobacteria; o__Myxococcales; f__Polyangiaceae; g__Aetherobacter; s__uncultured_bacterium
OTU_1144	0	0	0	0	0	0	0	0	0	0	0	0	0	0	0	0	0	1	0	0	0	0	0	0	0	0	0	0	0	0	30	24	52	7	2	4	18	9	12	8	29	16	2	0	1	d__Bacteria; p__Armatimonadetes; c__Armatimonadia; o__Armatimonadales; f__Armatimonadales_fa; g__Armatimonadales_ge
OTU_1145	3	0	0	1	1	0	0	0	8	0	2	0	0	0	0	0	0	0	0	0	0	0	0	0	2	0	1	0	0	0	0	0	0	0	0	0	0	0	0	0	0	0	0	0	0	d__Bacteria; p__Chloroflexi; c__Ktedonobacteria; o__C0119; f__C0119_fa; g__C0119_ge; s__uncultured_bacterium
OTU_1146	3	5	6	6	3	5	3	8	2	2	7	5	5	2	2	0	0	0	0	0	1	1	0	0	1	0	3	0	0	0	0	0	0	0	0	0	0	0	0	0	0	0	0	0	0	d__Bacteria; p__Proteobacteria; c__Alphaproteobacteria; o__Caulobacterales; f__Caulobacteraceae; g__PMMR1; s__uncultured_bacterium
OTU_1147	1	1	3	0	3	3	1	4	5	0	0	0	1	0	0	0	0	0	0	0	0	0	0	0	1	0	0	0	0	0	0	0	0	0	0	0	0	0	0	0	0	0	0	0	0	d__Bacteria; p__Proteobacteria; c__Alphaproteobacteria; o__Tistrellales; f__Geminicoccaceae; g__Candidatus_Alysiosphaera
OTU_1148	0	0	0	0	0	0	0	0	0	0	0	0	0	0	11	0	0	0	0	0	0	0	0	0	0	0	0	0	0	0	0	0	0	0	0	0	0	0	0	0	0	0	0	0	0	Unclassified
OTU_1149	0	1	3	2	1	0	0	0	5	0	0	0	1	0	0	0	0	0	0	0	0	0	0	0	0	0	0	0	0	0	0	0	0	0	0	0	0	0	0	0	0	0	0	0	0	d__Bacteria; p__FBP; c__FBP_cl; o__FBP_or; f__FBP_fa; g__FBP_ge
OTU_1150	2	2	1	1	2	0	1	2	6	5	2	3	0	0	0	0	0	0	0	0	0	0	0	0	0	0	0	0	0	0	0	0	0	0	0	0	0	0	0	0	0	0	0	0	0	d__Bacteria; p__Chloroflexi; c__Chloroflexia; o__Kallotenuales; f__AKIW781; g__AKIW781_ge
OTU_1151	1	0	0	0	0	2	0	3	6	2	3	1	3	1	0	0	0	0	1	0	0	0	0	0	0	0	0	0	0	0	0	0	0	0	0	0	0	0	0	0	0	0	0	0	0	d__Bacteria; p__Gemmatimonadetes; c__S0134_terrestrial_group; o__S0134_terrestrial_group_or; f__S0134_terrestrial_group_fa; g__S0134_terrestrial_group_ge; s__uncultured_bacterium
OTU_1152	0	0	0	17	2	0	1	0	3	0	0	5	0	0	0	0	0	1	0	1	4	0	0	0	0	0	0	0	0	0	0	0	0	0	0	0	2	9	0	3	0	0	0	0	0	d__Bacteria; p__Proteobacteria; c__Deltaproteobacteria; o__Myxococcales; f__Blfdi19; g__Blfdi19_ge
OTU_1153	0	0	0	0	0	0	0	0	0	0	0	0	0	0	0	0	0	0	0	0	0	0	0	0	0	0	0	0	0	0	7	71	7	0	1	0	22	0	2	0	0	3	0	0	0	d__Bacteria; p__Proteobacteria; c__Deltaproteobacteria; o__Oligoflexales; f__0319_6G20; g__0319_6G20_ge; s__uncultured_proteobacterium
OTU_1154	1	0	0	9	1	0	0	0	0	0	0	0	0	0	0	0	0	0	0	0	0	0	0	0	0	0	0	0	0	0	0	0	0	0	0	0	1	0	0	0	0	0	0	1	0	d__Bacteria; p__FBP; c__FBP_cl; o__FBP_or; f__FBP_fa; g__FBP_ge; s__uncultured_bacterium
OTU_1155	19	11	12	15	14	11	5	6	11	15	10	7	10	10	10	45	6	47	6	2	25	23	35	4	5	10	14	10	9	26	16	71	10	6	2	25	28	17	40	25	39	27	32	60	104	d__Bacteria; p__Proteobacteria; c__Alphaproteobacteria; o__Sphingomonadales; f__Sphingomonadaceae
OTU_1157	1	1	4	1	3	0	3	3	9	5	2	5	2	2	0	0	0	0	0	0	0	0	0	0	1	0	0	0	0	0	0	0	0	0	0	0	0	0	0	0	0	0	0	0	0	d__Bacteria; p__Bacteroidetes; c__Bacteroidia; o__Chitinophagales; f__Chitinophagaceae; g__uncultured
OTU_1158	0	4	1	3	5	3	5	6	6	3	1	2	3	0	1	0	0	0	4	0	0	0	0	0	2	0	0	0	0	1	0	0	0	0	0	0	1	0	0	0	0	0	0	0	0	d__Bacteria; p__Actinobacteria; c__Thermoleophilia; o__Solirubrobacterales; f__Solirubrobacteraceae
OTU_1159	1	3	3	1	1	0	3	5	19	1	3	3	3	1	2	0	0	0	0	0	0	0	0	0	0	0	0	0	0	0	0	0	0	0	0	0	0	0	0	0	0	0	0	0	0	d__Bacteria; p__Actinobacteria; c__Actinobacteria; o__Pseudonocardiales; f__Pseudonocardiaceae
OTU_116	26	177	22	58	235	47	53	8	23	554	73	27	211	145	20	13	4	29	0	22	85	20	30	15	9	15	132	112	24	32	0	9	2	2	0	0	0	0	0	1	1	0	3	37	10	d__Bacteria; p__FBP; c__FBP_cl; o__FBP_or; f__FBP_fa; g__FBP_ge; s__uncultured_endolithic_bacterium
OTU_1160	0	0	0	0	0	0	0	0	0	0	0	0	0	0	0	0	0	0	0	0	0	0	0	0	0	0	0	1	0	0	1	6	11	1	0	0	3	2	0	1	100	3	1	1	1	d__Bacteria
OTU_1162	2	0	0	5	0	0	0	0	1	2	1	1	1	0	0	0	0	0	0	0	0	0	0	0	0	0	0	0	0	0	0	0	0	0	0	0	0	0	0	0	0	0	0	0	0	d__Bacteria; p__Planctomycetes; c__Phycisphaerae; o__Tepidisphaerales; f__WD2101_soil_group; g__WD2101_soil_group_ge; s__uncultured_bacterium
OTU_1163	2	3	1	5	4	1	2	8	4	1	0	2	0	1	0	0	0	0	0	0	0	0	0	0	0	0	0	0	0	0	0	0	0	0	0	0	0	0	0	0	0	0	0	0	0	d__Bacteria; p__Actinobacteria; c__0319_7L14; o__0319_7L14_or; f__0319_7L14_fa; g__0319_7L14_ge
OTU_1164	0	0	0	1	3	0	1	4	1	1	0	1	1	0	0	0	0	15	0	0	0	0	0	0	0	1	0	0	0	0	0	0	0	0	0	0	2	3	0	2	0	0	7	0	0	d__Bacteria; p__Planctomycetes; c__Phycisphaerae; o__Tepidisphaerales; f__WD2101_soil_group; g__WD2101_soil_group_ge
OTU_1165	1	0	2	0	0	1	0	1	2	1	0	1	3	0	2	0	0	0	1	0	0	0	0	0	0	0	0	0	0	0	0	0	0	0	0	0	0	0	0	0	0	0	0	0	0	d__Bacteria; p__Proteobacteria; c__Deltaproteobacteria; o__Myxococcales; f__Sandaracinaceae; g__uncultured; s__uncultured_bacterium
OTU_1166	2	1	1	0	3	0	1	2	5	4	0	0	2	1	0	0	0	0	1	0	0	0	0	0	0	0	0	0	0	0	0	0	0	0	0	0	0	0	0	0	0	0	0	0	0	d__Bacteria; p__Planctomycetes; c__Planctomycetacia; o__Pirellulales; f__Pirellulaceae; g__Pirellula; s__uncultured_planctomycete
OTU_1167	0	3	1	0	1	1	2	2	2	0	0	1	2	1	1	0	0	0	0	0	0	0	0	0	0	0	0	0	0	0	0	0	0	0	0	0	0	0	0	0	0	0	0	0	0	d__Bacteria; p__Planctomycetes; c__Phycisphaerae; o__Phycisphaerales; f__Phycisphaeraceae; g__SM1A02
OTU_1168	0	0	0	0	0	0	0	0	0	0	0	0	0	0	0	0	0	0	0	0	0	0	0	0	0	0	0	0	0	0	1	6	0	4	0	8	62	1	1	2	25	0	0	0	2	Unclassified
OTU_117	72	157	16	83	92	79	33	10	8	55	64	34	23	26	16	2	5	22	39	83	250	34	31	16	255	39	144	13	34	13	1	0	0	0	0	0	0	0	0	0	0	0	0	0	0	d__Bacteria; p__Deinococcus_Thermus; c__Deinococci; o__Deinococcales; f__Deinococcaceae; g__Deinococcus
OTU_1170	0	0	0	0	1	0	2	1	1	1	0	1	1	0	0	0	0	9	0	3	17	9	13	2	0	1	0	12	1	15	2	4	0	32	0	0	1	0	2	9	17	1	18	1	35	d__Bacteria; p__Actinobacteria; c__Actinobacteria; o__Kineosporiales; f__Kineosporiaceae
OTU_1171	3	5	2	2	4	3	9	11	16	10	5	7	6	2	5	0	0	0	20	4	1	0	0	1	2	0	3	0	0	0	0	0	0	0	0	0	0	0	0	0	0	0	0	2	0	d__Bacteria; p__Proteobacteria; c__Alphaproteobacteria; o__Rhizobiales; f__Xanthobacteraceae; g__Rhodoplanes; s__metagenome
OTU_1172	4	1	4	2	3	1	3	4	3	0	1	0	5	3	0	0	0	0	0	0	0	0	0	0	0	0	0	0	0	0	0	0	0	0	0	0	0	0	0	0	0	0	0	0	0	d__Bacteria; p__Gemmatimonadetes; c__Gemmatimonadetes; o__Gemmatimonadales; f__Gemmatimonadaceae; g__uncultured
OTU_1173	452	502	547	175	190	689	308	28	53	1723	498	99	374	773	443	67	12	58	66	22	27	38	57	50	36	85	25	118	31	83	74	23	48	9	0	0	11	7	28	3	5	10	1	9	0	d__Bacteria; p__Bacteroidetes; c__Bacteroidia; o__Cytophagales; f__Hymenobacteraceae; g__Hymenobacter; s__uncultured_bacterium
OTU_1174	0	0	0	0	0	0	0	0	0	0	0	0	0	0	0	0	0	0	0	0	0	0	0	0	0	0	0	0	0	0	3	3	3	0	1	2	88	18	14	1	11	2	0	1	1	Unclassified
OTU_1175	0	0	0	1	4	2	1	0	1	2	2	2	0	1	0	0	0	0	0	0	0	0	0	0	0	2	0	0	0	0	0	0	0	0	0	0	0	0	0	0	0	0	0	0	0	d__Bacteria
OTU_1176	24	42	28	20	52	23	29	44	53	66	49	36	32	19	25	6	3	2	97	20	79	20	5	11	82	66	49	0	34	6	6	3	1	41	51	0	3	3	1	7	10	6	1	2	2	d__Bacteria; p__Actinobacteria; c__Actinobacteria; o__Frankiales; f__Geodermatophilaceae; g__Blastococcus
OTU_1177	2	3	3	2	0	5	5	10	7	0	2	4	2	3	2	0	0	0	0	0	0	0	0	0	2	0	0	0	0	0	0	0	0	0	0	0	0	0	0	0	0	0	0	0	0	d__Bacteria; p__Gemmatimonadetes; c__Gemmatimonadetes; o__Gemmatimonadales; f__Gemmatimonadaceae
OTU_1178	0	3	2	2	9	1	2	8	10	2	5	2	4	4	2	0	0	0	5	0	0	0	0	0	0	0	0	0	0	0	0	0	0	0	0	0	0	0	0	0	0	0	0	0	0	d__Bacteria; p__Acidobacteria; c__Holophagae; o__Subgroup_7; f__Subgroup_7_fa; g__Subgroup_7_ge
OTU_1179	0	2	0	0	4	3	5	3	2	1	0	2	1	0	1	0	0	0	0	0	0	0	0	0	0	0	0	0	0	0	0	0	0	0	0	0	0	0	0	0	0	0	0	0	0	d__Bacteria; p__Gemmatimonadetes; c__Longimicrobia; o__Longimicrobiales; f__Longimicrobiaceae; g__Longimicrobiaceae_ge; s__uncultured_bacterium
OTU_1183	0	0	0	0	0	0	0	0	0	5	16	1	0	0	0	0	0	0	0	0	0	0	0	0	0	0	0	0	0	0	0	0	0	0	0	0	0	0	0	0	0	0	0	0	0	d__Bacteria
OTU_1184	1	4	7	0	1	4	7	4	12	10	0	1	9	3	3	0	0	0	19	0	2	0	0	0	2	1	2	0	0	0	0	0	0	0	2	0	0	0	0	0	0	1	0	0	0	d__Bacteria; p__Actinobacteria; c__Acidimicrobiia; o__Microtrichales
OTU_1186	3	6	5	0	2	4	2	3	8	5	0	1	5	0	1	0	0	0	2	0	0	0	0	0	0	0	0	0	0	0	0	0	0	0	0	0	0	0	0	0	0	0	0	0	0	d__Bacteria; p__Actinobacteria; c__Acidimicrobiia; o__uncultured; f__uncultured_fa; g__uncultured_ge
OTU_1187	1	1	1	0	0	2	5	3	10	2	1	2	1	2	3	0	0	0	0	0	0	0	0	0	0	0	0	0	0	0	0	0	0	0	0	0	0	0	0	0	0	0	0	0	0	d__Bacteria; p__Gemmatimonadetes; c__Longimicrobia; o__Longimicrobiales; f__Longimicrobiaceae; g__Longimicrobiaceae_ge
OTU_1188	0	0	0	0	0	0	0	0	0	0	0	0	0	0	0	0	5	0	1	0	0	0	0	1	0	0	0	0	0	0	3	4	33	0	1	1	7	22	1	5	0	5	0	4	5	Unclassified
OTU_1189	10	5	5	3	5	1	5	9	9	6	7	2	8	0	1	0	0	0	0	0	0	0	0	0	0	0	0	0	0	0	0	0	0	0	0	0	0	0	0	0	0	0	0	0	0	d__Bacteria; p__Actinobacteria; c__0319_7L14; o__0319_7L14_or; f__0319_7L14_fa; g__0319_7L14_ge
OTU_1190	0	2	1	0	2	0	4	2	2	2	2	0	1	1	2	0	0	0	0	0	0	0	0	0	0	0	0	0	0	0	0	0	0	0	0	0	0	0	0	2	0	0	0	0	0	d__Bacteria; p__Proteobacteria; c__Alphaproteobacteria; o__Tistrellales; f__Geminicoccaceae
OTU_1191	0	1	1	1	0	0	3	0	6	4	2	7	0	2	2	0	0	0	1	0	0	0	0	0	0	0	0	0	0	0	0	0	0	0	0	0	0	0	0	0	0	0	0	0	0	d__Bacteria; p__Gemmatimonadetes; c__S0134_terrestrial_group; o__S0134_terrestrial_group_or; f__S0134_terrestrial_group_fa; g__S0134_terrestrial_group_ge; s__uncultured_bacterium
OTU_1192	3	1	0	7	0	1	0	1	0	0	0	0	0	0	0	0	0	0	0	0	0	0	0	0	0	0	0	0	0	0	0	0	0	0	0	0	0	0	0	0	0	0	0	0	0	d__Bacteria; p__Bacteroidetes; c__Bacteroidia; o__Cytophagales; f__Microscillaceae; g__Flexibacter; s__uncultured_Flexibacter_sp.
OTU_1194	1	3	3	0	2	2	1	1	12	2	0	0	0	0	0	0	0	0	0	0	0	0	0	0	0	0	0	0	0	0	0	0	0	0	0	0	0	0	0	0	0	0	0	0	0	d__Bacteria; p__Chloroflexi; c__P2_11E; o__P2_11E_or; f__P2_11E_fa; g__P2_11E_ge; s__uncultured_bacterium
OTU_1195	1	0	0	1	1	2	3	3	5	0	0	0	2	0	2	0	0	0	0	0	0	0	0	0	0	0	0	0	0	0	0	0	0	0	0	0	0	0	0	0	0	0	0	0	0	d__Bacteria; p__Actinobacteria; c__Acidimicrobiia
OTU_1196	3	0	1	0	2	1	6	1	4	1	1	2	1	0	1	0	0	0	0	1	0	0	0	0	0	0	0	0	0	0	0	0	0	0	0	0	0	0	0	0	0	0	0	0	0	d__Bacteria; p__Proteobacteria; c__Alphaproteobacteria; o__Elsterales; f__uncultured; g__uncultured_ge
OTU_1197	5	1	5	2	3	5	9	5	22	7	5	3	5	3	2	0	0	0	16	4	1	0	0	0	1	1	6	0	0	0	0	0	0	0	3	0	1	0	0	0	0	0	0	0	0	d__Bacteria; p__Acidobacteria; c__Subgroup_6; o__Subgroup_6_or; f__Subgroup_6_fa; g__Subgroup_6_ge; s__uncultured_Acidobacteriales_bacterium
OTU_1198	2	3	3	3	2	1	9	5	3	5	1	2	4	1	2	0	0	0	2	0	0	1	0	0	0	0	0	0	0	0	0	0	0	0	0	0	0	0	0	0	0	0	0	0	0	d__Bacteria; p__Bacteroidetes; c__Bacteroidia; o__Chitinophagales
OTU_1199	0	6	0	2	2	0	0	0	2	2	0	0	2	0	0	0	0	0	2	0	1	0	0	0	3	0	1	0	0	0	0	0	0	9	0	0	0	0	0	0	0	0	0	0	0	d__Bacteria; p__Planctomycetes; c__Phycisphaerae; o__Tepidisphaerales; f__WD2101_soil_group; g__WD2101_soil_group_ge; s__uncultured_bacterium
OTU_120	74	202	155	43	91	48	132	28	27	148	79	26	64	63	31	8	4	6	28	27	20	5	8	14	45	46	17	2	5	1	1	0	0	5	63	6	5	2	0	1	5	2	0	1	0	d__Bacteria; p__Actinobacteria; c__Actinobacteria; o__Micrococcales; f__Micrococcaceae; g__Kocuria; s__Kocuria_rosea
OTU_1200	2	0	0	1	0	1	1	1	0	0	0	4	0	1	0	2	119	0	2	2	0	0	18	0	4	17	0	0	0	0	0	0	0	0	0	0	0	0	0	0	0	0	0	0	0	d__Bacteria; p__Proteobacteria; c__Gammaproteobacteria; o__Betaproteobacteriales; f__Neisseriaceae; g__uncultured; s__metagenome
OTU_1201	0	0	0	0	1	0	0	0	0	0	0	0	0	0	0	0	0	1	0	0	0	0	2	1	0	0	2	0	0	2	0	0	0	0	0	1	0	1	2	0	0	0	8	51	46	d__Bacteria; p__Patescibacteria; c__Saccharimonadia; o__Saccharimonadales; f__Saccharimonadales_fa; g__Saccharimonadales_ge; s__uncultured_Candidatus_Saccharibacteria_bacterium
OTU_1202	0	0	0	0	1	0	1	0	0	0	0	0	0	0	0	48	3	20	1	2	2	10	1	10	0	24	13	0	0	1	0	0	0	0	0	0	0	1	0	0	1	0	0	0	0	d__Bacteria; p__Proteobacteria; c__Alphaproteobacteria; o__Sphingomonadales; f__Sphingomonadaceae
OTU_1203	0	1	1	0	0	3	0	3	5	3	2	0	0	1	1	0	0	0	1	1	0	0	0	0	0	0	0	0	0	0	0	0	0	0	0	0	0	0	0	0	0	0	0	0	0	d__Bacteria; p__Gemmatimonadetes; c__S0134_terrestrial_group; o__S0134_terrestrial_group_or; f__S0134_terrestrial_group_fa; g__S0134_terrestrial_group_ge
OTU_1204	0	2	3	1	2	2	5	0	2	4	0	0	2	0	0	0	0	0	7	1	0	0	0	0	0	0	0	0	0	0	0	0	0	0	0	0	0	0	0	0	0	0	0	0	0	d__Bacteria; p__Actinobacteria; c__Acidimicrobiia; o__Microtrichales; f__uncultured; g__uncultured_ge; s__uncultured_Iamiaceae_bacterium
OTU_1205	1	1	1	0	1	0	2	6	3	1	1	0	2	0	3	0	0	0	1	0	0	0	0	0	0	0	0	0	0	0	0	0	0	0	0	0	0	0	0	0	0	0	0	0	0	d__Bacteria
OTU_1206	0	0	0	0	0	0	0	0	0	0	0	0	0	0	0	0	0	0	0	0	0	0	0	0	0	0	0	0	0	0	3	12	2	57	19	41	23	3	1	50	47	12	1	2	1	Unclassified
OTU_1207	0	0	5	0	1	5	7	5	4	1	2	0	5	0	1	0	0	0	23	1	0	0	0	0	3	1	2	0	0	0	0	0	0	0	4	0	0	0	0	0	0	0	0	0	0	d__Bacteria; p__Proteobacteria; c__Deltaproteobacteria; o__RCP2_54; f__RCP2_54_fa; g__RCP2_54_ge; s__metagenome
OTU_1208	8	9	21	10	13	14	32	31	37	14	12	11	7	10	4	0	0	0	1	0	0	0	0	0	0	0	0	0	0	0	0	0	0	0	0	0	0	0	0	0	0	0	0	0	0	d__Bacteria; p__Acidobacteria; c__Holophagae; o__Subgroup_7; f__Subgroup_7_fa; g__Subgroup_7_ge
OTU_1209	1	2	1	1	5	2	0	0	4	3	1	0	1	1	0	1	0	0	18	2	0	0	0	0	1	0	0	0	0	0	1	0	0	0	4	0	0	0	0	0	0	0	0	0	0	d__Bacteria; p__Actinobacteria; c__Thermoleophilia; o__Gaiellales; f__uncultured; g__uncultured_ge
OTU_121	11	6	10	3	4	3	70	1	0	199	189	3	20	214	11	0	0	0	0	0	0	0	0	0	0	0	0	1	0	0	0	0	0	0	0	0	0	0	0	0	0	0	0	0	0	Unclassified
OTU_1212	4	2	0	1	7	3	4	2	8	3	1	2	4	3	4	0	0	0	7	2	1	1	1	0	2	3	0	0	2	0	0	0	0	0	0	0	0	0	0	0	0	0	0	0	0	d__Bacteria; p__Proteobacteria; c__Alphaproteobacteria; o__Rhizobiales; f__Beijerinckiaceae; g__Microvirga
OTU_1213	0	0	0	0	0	0	0	0	0	0	0	0	0	0	0	0	0	0	0	0	0	0	0	0	0	0	0	0	0	0	0	82	0	0	0	1	0	0	0	4	0	0	0	0	0	Unclassified
OTU_1214	0	0	0	0	0	0	0	0	0	0	0	0	0	0	0	0	0	0	0	0	0	0	0	0	0	0	0	0	0	0	0	14	0	0	0	0	36	28	0	11	4	0	11	1	19	d__Bacteria; p__Chloroflexi; c__Chloroflexia; o__Chloroflexales; f__Roseiflexaceae
OTU_1215	1	0	3	0	1	0	2	0	3	2	3	0	0	1	0	0	0	0	3	0	0	0	0	0	2	0	0	0	0	0	0	0	0	0	2	0	0	0	0	0	0	0	0	0	0	d__Bacteria; p__Nitrospirae; c__Nitrospira; o__Nitrospirales; f__Nitrospiraceae; g__Nitrospira; s__Nitrospira_sp._enrichment_culture_clone_80
OTU_1217	0	1	0	0	1	1	1	2	1	4	1	2	0	1	0	0	0	0	0	1	0	1	0	0	0	0	1	0	0	0	0	0	0	0	0	0	0	0	0	0	0	0	0	0	0	d__Bacteria; p__Planctomycetes; c__Phycisphaerae; o__Tepidisphaerales; f__WD2101_soil_group; g__WD2101_soil_group_ge
OTU_1218	5	5	5	8	7	3	31	4	9	0	1	3	3	2	0	0	0	0	0	0	0	0	0	0	0	0	0	0	0	0	0	0	0	0	0	0	0	0	0	0	0	0	0	0	0	d__Bacteria; p__Firmicutes; c__Clostridia; o__Clostridiales; f__Lachnospiraceae; g__Roseburia; s__metagenome
OTU_1219	7	4	1	1	2	2	8	7	12	8	6	3	5	1	4	0	0	0	0	0	1	0	0	0	0	0	0	0	0	0	1	0	0	0	0	0	0	0	0	0	0	1	0	5	0	d__Bacteria; p__Proteobacteria; c__Alphaproteobacteria; o__Rhizobiales; f__D05_2; g__D05_2_ge; s__metagenome
OTU_122	0	0	2	0	2	0	30	0	6	1	0	0	0	0	0	919	748	532	467	85	732	862	1085	323	558	551	697	213	638	552	25	9	1	22	1	1	19	3	5	2	2	5	5	9	15	d__Bacteria; p__Bacteroidetes; c__Bacteroidia; o__Cytophagales; f__Hymenobacteraceae; g__Hymenobacter
OTU_1220	0	2	1	1	0	2	1	2	3	1	2	1	5	2	2	0	0	0	1	0	0	0	0	0	0	0	0	0	0	0	0	0	0	0	0	0	0	0	0	0	0	0	0	0	0	d__Bacteria; p__Gemmatimonadetes; c__Gemmatimonadetes; o__Gemmatimonadales; f__Gemmatimonadaceae; g__Gemmatimonas
OTU_1221	0	2	2	0	0	0	6	1	7	0	2	1	1	1	0	0	0	0	0	0	0	0	0	0	0	0	0	0	0	0	0	0	0	0	0	0	0	0	0	0	0	0	0	0	0	d__Bacteria; p__Actinobacteria; c__Actinobacteria; o__Glycomycetales; f__Glycomycetaceae; g__Glycomyces
OTU_1222	0	0	0	2	0	0	0	0	1	0	0	0	0	1	0	49	3	0	0	0	0	0	1	1	1	0	0	4	0	1	72	0	0	20	3	32	3	8	0	13	46	29	0	0	0	d__Bacteria; p__Bacteroidetes; c__Bacteroidia; o__Flavobacteriales; f__Weeksellaceae; g__Chryseobacterium
OTU_1223	0	1	4	0	1	2	2	5	4	0	1	0	4	1	0	1	2	0	32	3	7	5	1	0	13	3	8	0	0	0	1	0	0	0	1	0	0	0	0	5	0	0	0	0	0	d__Bacteria; p__Actinobacteria; c__Rubrobacteria; o__Rubrobacterales; f__Rubrobacteriaceae; g__Rubrobacter; s__metagenome
OTU_1224	4	8	1	1	1	0	0	0	0	1	0	0	0	0	0	0	0	0	0	0	0	0	0	0	0	0	0	0	0	0	0	0	0	0	0	0	0	0	0	0	0	0	0	0	0	d__Bacteria; p__Proteobacteria; c__Deltaproteobacteria; o__Myxococcales; f__Blfdi19; g__Blfdi19_ge
OTU_1225	4	4	1	1	4	1	8	7	10	3	6	3	4	2	1	0	0	0	5	1	0	0	0	1	1	0	1	0	0	0	0	0	0	0	0	0	0	0	0	0	0	0	0	0	0	d__Bacteria; p__Actinobacteria; c__Acidimicrobiia; o__Microtrichales; f__uncultured; g__uncultured_ge; s__uncultured_bacterium
OTU_1226	0	2	0	0	2	1	0	0	0	2	1	0	2	8	0	0	0	0	0	0	0	2	0	2	0	0	0	0	0	0	0	0	0	0	0	0	0	0	0	0	0	0	0	0	0	Unclassified
OTU_1228	4	2	1	1	1	3	3	2	7	3	1	3	3	0	2	0	0	0	7	1	1	0	0	0	0	0	1	0	0	0	0	0	0	0	0	0	0	0	0	0	0	0	0	0	0	d__Bacteria; p__Proteobacteria; c__Gammaproteobacteria; o__Betaproteobacteriales; f__TRA3_20; g__TRA3_20_ge
OTU_1229	0	4	2	0	1	0	2	2	7	3	4	2	2	0	0	0	0	0	0	0	0	0	0	0	0	0	0	0	0	0	0	0	0	0	0	0	0	0	0	0	0	0	0	0	0	d__Bacteria; p__Planctomycetes; c__Planctomycetacia; o__Pirellulales; f__Pirellulaceae; g__Pirellula
OTU_123	1	0	0	176	0	0	0	0	0	0	0	0	0	0	0	0	0	1	0	3	15	31	0	1	12	1	134	1	0	0	0	0	0	0	0	0	0	0	0	0	0	0	0	0	1	d__Bacteria
OTU_1230	4	3	7	0	0	1	5	1	7	4	6	3	1	2	0	0	0	0	0	0	0	0	0	0	0	0	0	0	0	0	0	0	0	0	0	0	0	0	0	0	0	0	0	0	0	d__Bacteria; p__Proteobacteria; c__Gammaproteobacteria; o__Acidiferrobacterales; f__Acidiferrobacteraceae; g__Sulfurifustis
OTU_1231	4	15	9	3	7	8	19	24	35	20	8	11	17	8	8	0	0	0	73	7	5	0	1	1	0	5	8	0	1	0	0	1	0	1	3	1	0	0	0	2	0	0	0	0	0	d__Bacteria; p__Proteobacteria; c__Alphaproteobacteria; o__Rhizobiales; f__Xanthobacteraceae; g__uncultured
OTU_1232	0	0	0	0	0	0	0	0	0	0	0	0	0	0	0	15	1	1	0	37	9	1	2	4	4	39	8	0	0	0	0	0	1	0	1	2	0	0	0	0	14	2	0	0	0	Unclassified
OTU_1233	0	0	0	0	0	0	15	0	0	5	0	0	0	0	0	0	0	0	0	0	0	0	0	0	0	0	0	0	0	0	0	0	0	0	0	0	0	0	0	0	1	0	0	0	0	d__Bacteria; p__Proteobacteria; c__Gammaproteobacteria; o__Enterobacteriales; f__Enterobacteriaceae; g__Buchnera; s__Buchnera_aphidicola
OTU_1234	0	0	0	1	0	0	0	9	2	0	0	0	1	1	0	0	0	0	0	0	0	0	0	0	0	0	0	0	0	0	0	0	0	0	0	0	0	0	0	0	0	0	0	0	0	Unclassified
OTU_1235	1	1	19	1	0	9	11	5	9	8	1	0	3	1	0	0	0	0	39	2	1	0	0	0	1	0	0	0	0	0	0	0	0	0	5	0	0	0	0	0	0	0	0	0	0	d__Bacteria; p__Proteobacteria; c__Gammaproteobacteria; o__PLTA13; f__PLTA13_fa; g__PLTA13_ge; s__uncultured_bacterium
OTU_1236	0	0	0	0	0	0	0	0	0	0	0	0	0	0	0	1	7	1	0	0	7	8	4	3	0	0	1	0	0	1	13	16	6	4	0	3	29	4	2	0	2	8	0	0	7	d__Bacteria; p__Proteobacteria; c__Deltaproteobacteria; o__Oligoflexales; f__0319_6G20; g__0319_6G20_ge
OTU_1237	0	0	0	0	0	0	0	0	0	0	0	0	0	0	0	0	0	0	0	0	0	0	0	0	0	0	0	0	0	0	0	10	6	2	0	3	2	0	0	46	37	5	0	0	0	Unclassified
OTU_1238	1	3	0	4	1	3	1	4	9	4	1	0	0	1	4	0	0	1	12	0	2	0	0	0	6	4	7	0	0	0	0	0	0	0	0	0	2	0	0	0	1	0	0	0	0	d__Bacteria; p__Verrucomicrobia; c__Verrucomicrobiae; o__Chthoniobacterales; f__Chthoniobacteraceae; g__Chthoniobacter; s__uncultured_Verrucomicrobia_bacterium
OTU_1239	2	0	0	1	3	1	1	3	1	1	0	4	0	0	1	0	0	0	0	0	0	0	0	0	0	0	0	0	0	0	0	0	0	0	0	0	0	0	0	0	0	0	0	0	0	d__Bacteria; p__Chloroflexi; c__Chloroflexia; o__Chloroflexales; f__Chloroflexaceae
OTU_124	35	31	7	44	13	18	11	8	13	586	28	10	86	25	13	46	11	211	9	5	44	6	2	1	5	11	11	2	6	31	16	0	0	4	1	74	3	1	1	8	9	4	2	2	4	d__Bacteria; p__Bacteroidetes; c__Bacteroidia; o__Sphingobacteriales; f__Sphingobacteriaceae; g__Pedobacter
OTU_1240	1	0	0	3	1	0	3	0	5	0	0	0	0	1	0	0	0	0	1	0	0	0	0	0	0	0	0	0	0	0	1	0	0	0	0	0	0	0	0	0	0	0	0	0	0	d__Bacteria; p__Proteobacteria; c__Deltaproteobacteria; o__Myxococcales; f__Haliangiaceae; g__Haliangium; s__uncultured_delta_proteobacterium
OTU_1241	1	1	1	1	0	0	0	2	1	0	0	1	2	1	1	0	0	0	0	0	0	0	0	0	0	0	0	0	0	0	0	0	0	0	0	0	0	0	0	0	0	0	0	0	0	d__Bacteria; p__Planctomycetes; c__Phycisphaerae; o__Phycisphaerales; f__Phycisphaeraceae; g__SM1A02; s__metagenome
OTU_1242	1	0	0	1	1	0	7	3	7	4	1	0	2	0	3	0	0	0	0	0	0	0	0	0	0	0	0	0	0	0	0	0	0	0	0	0	0	0	0	0	0	0	0	0	0	d__Bacteria; p__Gemmatimonadetes; c__Gemmatimonadetes; o__Gemmatimonadales; f__Gemmatimonadaceae; g__Gemmatimonas
OTU_1243	4	5	3	3	1	2	12	6	5	6	7	7	7	2	3	0	0	0	5	1	0	0	0	2	0	1	0	0	0	0	1	0	0	0	0	0	0	0	0	0	0	0	0	0	1	d__Bacteria; p__Proteobacteria; c__Deltaproteobacteria; o__Myxococcales; f__BIrii41; g__BIrii41_ge; s__metagenome
OTU_1244	0	3	0	2	1	0	3	3	7	1	3	3	2	0	3	0	0	0	0	0	0	0	0	0	0	0	0	0	0	0	0	0	0	0	0	0	0	0	0	0	0	0	0	0	0	d__Bacteria; p__Gemmatimonadetes; c__Longimicrobia; o__Longimicrobiales; f__Longimicrobiaceae; g__Longimicrobiaceae_ge; s__uncultured_bacterium
OTU_1246	1	0	0	0	1	0	0	2	5	4	1	0	2	0	0	0	0	0	1	2	0	0	0	0	0	0	1	0	0	0	0	0	0	0	0	0	0	0	0	0	0	0	0	0	0	d__Bacteria; p__Planctomycetes; c__Phycisphaerae; o__Tepidisphaerales; f__WD2101_soil_group; g__WD2101_soil_group_ge; s__uncultured_bacterium
OTU_1248	2	7	10	3	4	4	8	5	4	4	4	3	3	4	1	0	0	0	0	0	1	0	0	0	0	0	0	0	0	0	0	0	0	0	0	0	0	0	0	0	0	1	0	0	0	d__Bacteria; p__Actinobacteria; c__Actinobacteria; o__Micrococcales; f__Promicromonosporaceae
OTU_1249	2	3	3	0	4	2	4	8	5	6	10	4	3	4	3	0	1	0	22	0	3	1	0	0	1	2	0	0	1	0	1	0	0	0	6	0	0	0	0	1	0	0	0	0	0	d__Bacteria; p__Proteobacteria; c__Gammaproteobacteria; o__Betaproteobacteriales; f__Nitrosomonadaceae; g__Nitrosospira
OTU_125	79	13	11	501	73	38	15	83	30	99	106	102	34	20	8	3	0	9	0	0	3	0	0	0	7	3	2	0	0	1	0	0	0	6	0	0	9	5	0	0	5	1	2	5	4	d__Bacteria; p__Deinococcus_Thermus; c__Deinococci; o__Deinococcales; f__Trueperaceae; g__Truepera; s__uncultured_endolithic_bacterium
OTU_1250	1	3	2	1	4	1	1	3	7	1	2	1	4	1	3	0	0	0	4	0	0	0	0	0	0	1	2	0	0	0	0	0	0	0	9	0	0	0	0	0	0	0	0	0	0	d__Bacteria; p__Acidobacteria; c__Subgroup_6
OTU_1251	0	4	2	2	3	2	4	5	1	2	3	3	0	1	2	1	0	1	5	1	36	23	45	7	10	10	20	15	22	8	12	80	17	6	0	4	6	11	5	8	21	6	24	31	15	d__Bacteria; p__Proteobacteria; c__Alphaproteobacteria; o__Acetobacterales; f__Acetobacteraceae; g__Roseomonas
OTU_1252	6	3	3	3	5	2	9	8	14	9	6	4	8	1	2	0	0	0	0	0	0	0	0	0	0	0	0	0	0	0	0	0	0	0	0	0	0	0	0	0	0	0	0	0	0	d__Bacteria; p__Verrucomicrobia; c__Verrucomicrobiae; o__Pedosphaerales; f__Pedosphaeraceae
OTU_1253	0	1	1	1	0	3	4	3	2	0	2	0	6	1	0	0	0	0	6	1	1	0	0	0	1	1	1	0	0	0	0	0	0	0	2	0	0	0	0	0	0	0	0	0	0	d__Bacteria; p__Chloroflexi; c__KD4_96; o__KD4_96_or; f__KD4_96_fa; g__KD4_96_ge; s__uncultured_bacterium
OTU_1254	3	1	1	3	1	0	7	9	6	2	2	4	3	0	1	0	0	0	0	0	0	0	0	0	0	2	0	0	0	0	0	0	0	0	0	0	0	0	0	0	0	0	0	0	0	d__Bacteria; p__Gemmatimonadetes; c__S0134_terrestrial_group; o__S0134_terrestrial_group_or; f__S0134_terrestrial_group_fa; g__S0134_terrestrial_group_ge; s__metagenome
OTU_1255	5	1	4	0	0	2	4	0	0	1	2	0	0	2	3	0	1	0	1	0	0	1	0	0	1	0	0	0	1	0	0	0	0	0	0	0	0	0	0	0	0	0	0	0	0	d__Bacteria; p__Firmicutes; c__Clostridia; o__Clostridiales; f__Peptostreptococcaceae; g__Terrisporobacter; s__uncultured_bacterium
OTU_1256	3	2	2	1	4	2	2	5	12	6	2	1	3	1	5	0	0	0	3	0	0	0	0	0	1	0	3	0	0	0	0	0	0	0	0	0	0	0	0	0	0	0	0	0	0	d__Bacteria; p__Planctomycetes; c__Planctomycetacia; o__Pirellulales; f__Pirellulaceae; g__Pirellula; s__uncultured_planctomycete
OTU_1257	1	9	0	0	0	1	0	0	0	1	0	0	1	0	0	0	0	0	0	0	0	0	0	0	0	1	0	0	0	0	0	0	0	0	0	0	0	0	0	2	0	0	0	0	0	d__Bacteria; p__Firmicutes; c__Bacilli; o__Lactobacillales; f__Streptococcaceae; g__Streptococcus
OTU_1258	0	0	2	0	0	0	0	0	0	0	0	14	1	0	0	0	0	1	0	0	0	0	0	0	0	0	0	0	0	0	1	0	0	0	0	0	0	0	0	0	0	0	0	0	0	d__Bacteria; p__Proteobacteria; c__Gammaproteobacteria; o__Diplorickettsiales; f__Diplorickettsiaceae; g__uncultured
OTU_1259	1	4	4	1	2	1	1	5	7	3	0	1	3	1	1	0	0	0	0	0	0	0	0	0	1	1	0	0	0	0	0	0	0	0	0	0	0	0	0	0	0	0	0	0	0	d__Bacteria; p__Actinobacteria; c__Thermoleophilia; o__Solirubrobacterales; f__Solirubrobacteraceae
OTU_126	33	57	82	17	16	17	11	5	6	180	44	15	148	33	18	0	0	0	0	1	0	3	0	0	2	3	1	0	0	0	0	0	0	2	0	10	0	0	0	3	0	1	0	0	0	d__Bacteria; p__Proteobacteria; c__Alphaproteobacteria; o__Sphingomonadales; f__Sphingomonadaceae; g__Altererythrobacter; s__Porphyrobacter_mercurialis
OTU_1260	2	0	0	4	3	1	2	4	1	1	1	0	0	0	0	0	0	0	0	0	5	0	1	0	0	1	0	1	1	5	1	0	0	0	0	0	0	0	0	1	3	0	0	0	3	d__Bacteria; p__Actinobacteria; c__Acidimicrobiia; o__Microtrichales
OTU_1261	1	4	4	0	1	1	3	2	14	4	3	0	4	0	1	0	0	0	1	0	0	0	0	0	0	0	0	0	0	0	0	0	0	0	0	0	0	0	0	0	0	0	0	0	0	d__Bacteria; p__Planctomycetes; c__Phycisphaerae; o__Tepidisphaerales; f__WD2101_soil_group; g__WD2101_soil_group_ge; s__uncultured_bacterium
OTU_1262	0	0	3	0	0	0	2	2	3	1	0	0	0	0	0	1	1	0	11	5	0	0	0	0	6	1	2	0	0	0	0	0	0	0	0	0	0	1	0	2	0	0	0	0	0	d__Bacteria; p__Proteobacteria; c__Alphaproteobacteria; o__Reyranellales; f__Reyranellaceae; g__Reyranella
OTU_1263	5	2	0	0	2	1	10	7	9	1	1	8	3	2	1	0	0	0	0	0	0	0	0	0	0	0	0	0	0	0	0	0	0	0	0	0	0	0	0	0	0	0	0	0	0	d__Bacteria; p__Gemmatimonadetes; c__Gemmatimonadetes; o__Gemmatimonadales; f__Gemmatimonadaceae; g__Gemmatimonas
OTU_1264	1	1	0	1	7	0	1	0	1	1	0	0	7	2	0	0	0	0	0	0	0	0	0	0	0	0	0	0	0	0	0	0	0	0	0	0	0	0	0	0	0	0	0	0	0	d__Bacteria; p__FBP; c__FBP_cl; o__FBP_or; f__FBP_fa; g__FBP_ge; s__uncultured_bacterium
OTU_1265	1	3	1	0	1	1	2	3	4	2	0	2	1	0	2	0	0	0	0	0	0	0	0	0	0	0	0	0	0	0	0	0	0	0	0	0	0	0	0	0	0	0	0	0	0	d__Bacteria; p__Actinobacteria; c__MB_A2_108; o__MB_A2_108_or; f__MB_A2_108_fa; g__MB_A2_108_ge; s__uncultured_bacterium
OTU_1266	0	0	0	0	0	0	0	0	0	0	0	0	0	0	0	0	0	0	0	0	0	0	1	0	0	0	0	0	0	1	0	502	0	0	0	1	0	0	0	0	0	0	0	0	0	d__Bacteria; p__Proteobacteria; c__Gammaproteobacteria; o__Pseudomonadales; f__Pseudomonadaceae; g__Pseudomonas
OTU_1267	0	0	0	2	0	1	1	2	4	2	4	1	1	2	0	0	0	0	0	0	0	0	0	0	0	0	0	0	0	0	0	0	0	0	0	0	0	0	0	0	0	0	0	0	0	d__Bacteria; p__Bacteroidetes; c__Bacteroidia; o__Sphingobacteriales; f__env.OPS_17; g__env.OPS_17_ge
OTU_1268	0	3	2	1	0	1	2	3	4	1	0	1	1	1	1	0	0	0	0	0	0	0	0	0	0	0	0	0	0	0	0	0	0	0	0	0	0	0	0	0	0	0	0	0	0	d__Bacteria; p__Acidobacteria; c__Acidobacteriia; o__Solibacterales; f__Solibacteraceae_Subgroup_3
OTU_1269	0	1	1	1	0	1	1	3	5	0	0	0	1	1	2	0	0	0	1	0	0	0	0	0	0	0	0	0	0	0	0	0	0	0	0	0	0	0	0	0	0	0	0	0	0	d__Bacteria; p__Chloroflexi; c__Anaerolineae; o__Ardenticatenales; f__uncultured; g__uncultured_ge
OTU_127	2	4	1	2	3	3	1	3	6	4	7	5	3	1	0	151	115	283	21	13	193	145	119	72	28	33	57	78	134	180	1905	1758	548	251	79	174	176	207	243	200	866	581	530	613	592	d__Bacteria; p__Actinobacteria; c__Actinobacteria; o__Micrococcales; f__Microbacteriaceae
OTU_1270	5	0	1	0	0	0	2	0	0	2	0	0	0	2	2	0	1	0	0	1	0	0	0	2	0	0	0	0	0	1	0	0	0	0	0	1	1	2	0	1	0	2	0	0	0	Unclassified
OTU_1271	0	0	0	0	0	0	0	0	0	0	0	0	0	0	0	0	0	0	0	0	0	2	0	0	0	0	0	0	1	0	13	22	16	0	1	1	5	21	3	1	22	3	1	0	0	d__Bacteria; p__Planctomycetes; c__Phycisphaerae; o__Tepidisphaerales; f__WD2101_soil_group; g__WD2101_soil_group_ge
OTU_1272	0	7	0	1	2	0	2	0	0	15	1	0	4	8	0	0	0	0	0	0	0	0	0	1	0	0	0	0	0	0	0	0	0	0	0	0	0	0	0	0	0	0	0	0	0	Unclassified
OTU_1273	1	0	0	0	0	0	3	0	0	0	1	0	1	2	0	1	0	0	1	0	0	0	3	1	0	0	8	0	0	0	0	0	0	0	0	0	0	0	0	0	0	0	0	0	0	Unclassified
OTU_1274	3	1	0	1	0	1	0	0	0	6	0	1	2	1	0	0	0	0	1	0	0	0	0	0	0	0	1	0	0	0	0	0	0	0	0	0	0	0	0	0	1	0	0	0	0	Unclassified
OTU_1275	0	1	0	0	0	0	0	0	0	0	1	0	0	0	0	0	0	0	0	0	0	1	0	0	0	0	0	0	0	0	2	30	1	0	0	1	2	3	2	7	3	2	45	14	22	d__Bacteria; p__Proteobacteria; c__Alphaproteobacteria; o__Rhizobiales; f__Beijerinckiaceae; g__Methylobacterium
OTU_1276	0	0	0	0	0	0	0	0	0	0	0	0	0	0	0	0	0	0	0	6	0	0	0	0	0	0	0	0	0	0	0	71	0	0	0	0	10	3	2	0	0	0	0	3	0	Unclassified
OTU_1278	5	7	0	1	2	0	0	1	0	2	0	0	0	0	0	0	0	1	0	0	1	1	0	0	0	0	0	0	0	0	0	0	0	0	0	0	0	0	0	0	0	0	1	0	0	d__Bacteria; p__Actinobacteria; c__Actinobacteria
OTU_1279	0	0	0	0	0	0	1	1	0	0	0	0	1	0	1	1	0	8	1	1	14	16	0	0	0	0	6	5	1	6	31	43	42	2	1	6	0	4	29	1	2	19	12	122	16	d__Bacteria; p__Patescibacteria; c__Saccharimonadia; o__Saccharimonadales; f__Saccharimonadales_fa; g__Saccharimonadales_ge
OTU_128	0	0	0	0	0	0	0	0	0	0	0	0	0	0	0	114	0	3	2	5	1	1	19	0	0	0	3	0	0	0	518	211	50	1596	1318	1136	1507	3885	129	1085	755	3001	0	3	13	d__Bacteria; p__Proteobacteria; c__Alphaproteobacteria; o__Acetobacterales; f__Acetobacteraceae; g__Endobacter; s__uncultured_bacterium
OTU_1280	2	0	1	3	2	2	2	2	4	7	0	2	2	0	3	0	0	0	1	0	1	0	0	0	0	0	0	0	0	0	0	0	0	2	3	0	0	0	0	0	2	0	0	0	0	d__Bacteria; p__Actinobacteria; c__Actinobacteria; o__Propionibacteriales; f__Nocardioidaceae; g__Nocardioides
OTU_1281	0	1	0	2	2	0	2	0	2	2	2	0	3	0	2	0	0	0	1	0	0	0	0	0	0	0	0	0	0	0	0	0	0	0	0	0	0	0	0	0	0	0	0	0	0	d__Bacteria; p__Bacteroidetes; c__Bacteroidia; o__Sphingobacteriales; f__NS11_12_marine_group; g__NS11_12_marine_group_ge
OTU_1282	0	0	0	0	0	0	0	0	0	0	0	0	0	0	0	0	0	0	0	1	0	0	2	0	0	0	1	0	0	0	117	86	103	41	151	45	8	39	7	46	38	37	0	0	2	d__Bacteria; p__Proteobacteria; c__Alphaproteobacteria; o__Acetobacterales; f__Acetobacteraceae
OTU_1283	0	1	0	3	4	1	0	3	1	2	0	0	1	1	0	0	0	1	0	0	2	0	0	0	0	0	0	0	0	0	0	0	0	1	0	0	0	0	0	0	0	0	0	0	0	d__Bacteria; p__Bacteroidetes; c__Rhodothermia; o__Rhodothermales; f__Rhodothermaceae; g__Rubrivirga; s__uncultured_bacterium
OTU_1284	8	3	0	4	2	2	5	0	1	0	0	0	0	0	0	0	0	0	0	0	0	0	0	0	0	0	0	0	0	0	0	0	0	0	0	0	0	0	0	0	0	0	0	0	0	d__Bacteria; p__Firmicutes; c__Clostridia; o__Clostridiales; f__Lachnospiraceae; g__Blautia
OTU_1285	0	0	0	0	5	0	0	0	0	0	0	0	0	0	0	0	0	5	0	0	5	0	0	0	1	0	0	0	1	4	0	1	0	6	0	3	10	1	17	1	52	5	7	22	21	d__Bacteria; p__Armatimonadetes; c__Armatimonadia; o__Armatimonadales
OTU_1287	0	0	0	0	0	0	0	0	0	0	0	0	0	0	0	0	0	0	0	0	0	0	0	0	0	0	1	0	0	0	1	0	13	20	4	12	2	2	4	1	12	30	36	2	13	d__Bacteria; p__Planctomycetes; c__Planctomycetacia; o__Isosphaerales; f__Isosphaeraceae; g__Singulisphaera
OTU_129	128	88	28	183	218	111	50	285	98	96	198	299	77	45	24	11	0	300	106	9	359	89	31	2	69	46	52	9	74	117	2	0	1	42	1	1	25	25	0	18	37	0	6	3	4	d__Bacteria; p__Bacteroidetes; c__Bacteroidia; o__Chitinophagales; f__Chitinophagaceae; g__Ferruginibacter
OTU_1290	0	0	0	0	0	0	0	0	0	0	0	0	0	0	0	0	0	0	0	0	0	0	0	0	0	0	0	0	0	0	1	0	0	3	6	0	12	41	6	1	5	0	1	0	2	d__Bacteria
OTU_1291	1	2	2	1	2	0	2	0	2	2	1	0	0	0	0	0	0	0	0	0	0	0	0	0	0	0	0	0	0	0	0	0	0	0	0	0	0	0	0	0	0	0	0	0	0	d__Bacteria; p__Planctomycetes; c__Planctomycetacia; o__Gemmatales; f__Gemmataceae; g__uncultured
OTU_1292	1	8	0	0	0	0	0	0	0	0	0	0	0	0	0	0	0	0	0	0	1	0	0	8	0	16	0	0	0	0	0	0	0	0	0	0	0	0	0	0	0	0	0	0	0	Unclassified
OTU_1293	1	2	0	0	3	1	2	4	5	8	1	2	2	0	0	2	0	52	1	2	0	0	0	0	0	0	0	0	0	1	0	0	0	0	1	0	0	0	0	0	5	0	3	7	0	d__Bacteria; p__Proteobacteria; c__Alphaproteobacteria; o__Rhizobiales; f__Devosiaceae; g__Devosia
OTU_1294	0	1	2	4	2	0	3	3	1	0	1	2	0	1	1	0	0	0	0	0	1	1	1	0	1	0	0	0	0	0	0	0	0	0	0	0	1	0	0	0	0	0	0	0	0	d__Bacteria; p__Proteobacteria; c__Deltaproteobacteria; o__Oligoflexales; f__Oligoflexaceae; g__Oligoflexus; s__uncultured_bacterium
OTU_1295	1	2	1	1	2	2	2	4	17	2	3	0	4	1	0	0	0	0	1	1	0	0	0	0	1	0	0	0	0	0	0	0	0	0	2	0	0	0	0	0	0	0	0	0	0	d__Bacteria; p__Verrucomicrobia; c__Verrucomicrobiae; o__Chthoniobacterales; f__Chthoniobacteraceae; g__Chthoniobacter
OTU_1296	0	0	0	0	0	0	0	0	0	0	18	0	2	1	0	0	0	0	0	0	0	1	0	0	0	0	0	0	1	1	2	0	0	4	0	21	5	1	1	11	26	28	0	0	0	d__Bacteria; p__Proteobacteria; c__Alphaproteobacteria; o__Sphingomonadales; f__Sphingomonadaceae; g__Sphingobium
OTU_1297	1	2	2	0	1	1	0	0	2	1	1	0	1	0	0	0	0	0	0	0	0	0	0	0	0	0	0	0	0	0	0	0	0	0	0	0	0	0	0	0	0	0	0	0	0	d__Bacteria; p__FBP; c__FBP_cl; o__FBP_or; f__FBP_fa; g__FBP_ge
OTU_1298	4	8	1	0	1	0	1	2	1	3	0	1	2	1	0	0	0	0	0	0	0	0	0	0	0	0	0	0	0	0	0	0	0	0	0	0	0	0	0	0	0	0	0	0	0	d__Bacteria; p__Proteobacteria; c__Alphaproteobacteria; o__Sphingomonadales; f__Sphingomonadaceae
OTU_1299	0	1	5	1	1	3	14	2	8	8	1	3	4	1	5	0	0	0	10	3	0	0	0	0	1	1	2	0	0	0	0	0	0	0	1	0	0	0	0	0	0	0	0	0	0	d__Bacteria; p__Proteobacteria; c__Alphaproteobacteria; o__Rhizobiales; f__Rhizobiales_Incertae_Sedis; g__uncultured
OTU_13	2103	1856	985	575	1880	1056	739	137	128	4625	2486	575	1449	1352	520	18	4	63	267	43	367	153	57	49	99	96	345	45	31	86	2	0	0	111	0	1	0	1	0	0	0	1	2	0	0	d__Bacteria; p__Bacteroidetes; c__Bacteroidia; o__Cytophagales; f__Hymenobacteraceae; g__Hymenobacter
OTU_130	0	0	0	0	0	0	0	0	0	0	0	0	0	0	0	68	14	22	0	0	1	1	0	0	1	3	0	0	0	0	34	74	23	1146	192	272	257	715	5	1372	373	744	4	11	14	d__Bacteria; p__Proteobacteria; c__Gammaproteobacteria; o__Betaproteobacteriales; f__Burkholderiaceae; g__Burkholderia_Caballeronia_Paraburkholderia
OTU_1300	2	0	1	1	1	2	0	0	3	2	0	0	1	1	0	0	0	0	0	0	0	0	0	0	0	0	0	0	0	0	0	0	0	0	0	0	0	0	0	0	0	0	0	0	0	d__Bacteria; p__Planctomycetes; c__Phycisphaerae; o__Tepidisphaerales; f__WD2101_soil_group; g__WD2101_soil_group_ge
OTU_1302	1	1	5	6	0	2	1	2	5	1	1	1	2	0	1	0	0	0	0	0	0	0	0	0	0	0	0	0	0	0	0	0	0	0	0	0	0	0	0	0	0	0	0	0	0	d__Bacteria; p__FBP; c__FBP_cl; o__FBP_or; f__FBP_fa; g__FBP_ge; s__uncultured_soil_bacterium
OTU_1303	36	29	15	8	19	11	3	1	0	106	32	27	20	11	4	11	0	0	0	0	1	0	1	0	0	0	3	0	0	0	0	0	0	0	0	0	0	0	0	0	1	0	0	0	0	d__Bacteria; p__Bacteroidetes; c__Bacteroidia; o__Cytophagales; f__Hymenobacteraceae; g__Hymenobacter
OTU_1305	1	5	7	1	4	3	8	4	17	1	0	1	0	3	0	0	0	0	0	0	0	0	0	0	0	0	0	0	0	0	0	0	0	0	0	0	0	0	0	1	0	0	0	0	0	d__Bacteria; p__Firmicutes; c__Clostridia; o__Clostridiales; f__Ruminococcaceae; g__Faecalibacterium; s__uncultured_bacterium
OTU_1306	0	3	3	0	3	3	3	3	7	10	2	0	1	3	0	0	0	0	0	0	0	0	0	0	0	0	0	0	0	0	0	0	0	0	0	0	0	0	0	0	0	0	0	0	0	d__Bacteria; p__Planctomycetes; c__Phycisphaerae; o__Tepidisphaerales; f__WD2101_soil_group; g__WD2101_soil_group_ge; s__uncultured_planctomycete
OTU_1307	0	0	0	0	0	0	4	2	1	1	0	1	0	0	0	0	0	0	27	0	2	0	0	15	0	0	4	0	0	26	1	1	0	3	7	45	0	4	0	0	10	0	0	10	7	d__Bacteria; p__Bacteroidetes; c__Bacteroidia; o__Flavobacteriales; f__Flavobacteriaceae; g__Flavobacterium
OTU_1309	0	1	2	1	1	0	1	1	5	0	1	2	1	0	0	0	0	0	0	0	0	0	0	0	0	0	0	0	0	0	0	0	0	0	0	0	0	0	0	0	0	0	0	0	0	d__Bacteria; p__Proteobacteria; c__Alphaproteobacteria; o__Rhodospirillales; f__Rhodopirillaceae; g__Defluviicoccus; s__uncultured_bacterium
OTU_1310	1	2	1	0	5	1	4	4	13	11	5	3	2	4	0	0	0	0	1	0	0	0	0	0	0	0	0	0	0	0	0	0	0	0	0	0	0	0	0	0	0	0	0	0	0	d__Bacteria; p__Proteobacteria; c__Alphaproteobacteria; o__Rhizobiales; f__Hyphomicrobiaceae; g__Pedomicrobium
OTU_1311	0	1	0	0	1	3	2	4	6	2	0	3	4	1	3	0	0	0	8	0	0	0	1	0	0	0	0	0	0	0	0	0	0	0	0	0	0	0	0	0	1	0	0	0	0	d__Bacteria; p__Proteobacteria; c__Alphaproteobacteria; o__Micropepsales; f__Micropepsaceae; g__uncultured
OTU_1312	1	2	0	4	2	2	0	1	1	0	3	0	0	0	0	0	1	1	0	1	2	1	0	0	3	0	3	0	1	1	0	0	0	25	0	0	16	5	1	1	12	0	3	0	1	d__Bacteria; p__Chloroflexi; c__Chloroflexia; o__Thermomicrobiales; f__JG30_KF_CM45; g__JG30_KF_CM45_ge; s__uncultured_soil_bacterium
OTU_1313	0	1	0	2	0	0	1	1	2	0	0	2	1	1	1	0	0	0	0	0	0	0	0	0	0	0	0	0	0	0	0	0	0	0	0	0	0	0	0	0	0	0	0	0	0	d__Bacteria; p__Acidobacteria; c__Acidobacteriia; o__Solibacterales; f__Solibacteraceae_Subgroup_3; g__Bryobacter
OTU_1315	0	0	1	1	1	2	3	6	5	2	3	1	4	1	2	0	0	0	6	1	0	1	0	0	0	0	0	0	0	0	0	1	0	0	0	0	0	0	0	0	0	0	0	0	0	d__Bacteria; p__Bacteroidetes; c__Bacteroidia; o__Sphingobacteriales; f__env.OPS_17; g__env.OPS_17_ge
OTU_1316	0	0	0	12	0	0	0	0	0	0	0	0	0	0	0	0	0	0	0	0	0	0	0	0	0	0	0	0	0	0	0	0	0	0	0	0	0	0	0	0	0	0	0	0	0	Unclassified
OTU_1318	3	1	5	0	0	0	5	3	7	7	1	2	5	0	2	0	0	0	38	6	7	0	0	0	7	5	4	0	2	1	0	0	0	0	2	0	0	0	1	0	1	0	0	0	1	d__Bacteria; p__Bacteroidetes; c__Bacteroidia; o__Chitinophagales; f__Chitinophagaceae; g__Ferruginibacter
OTU_1319	0	0	0	1	0	0	0	1	5	2	1	2	0	1	1	0	0	0	5	2	1	0	0	0	0	0	3	0	0	0	0	0	0	0	0	0	0	0	0	0	0	0	0	1	0	d__Bacteria; p__Chloroflexi; c__Chloroflexia; o__Thermomicrobiales; f__JG30_KF_CM45; g__JG30_KF_CM45_ge
OTU_1320	2	5	3	3	3	2	6	4	10	9	2	7	6	1	3	0	2	0	124	13	30	7	3	6	24	12	28	0	6	2	1	0	0	3	0	0	0	0	0	5	0	0	0	4	0	d__Bacteria; p__Actinobacteria; c__Actinobacteria; o__Corynebacteriales; f__Mycobacteriaceae; g__Mycobacterium
OTU_1321	2	2	1	1	0	0	1	3	4	1	2	1	2	1	3	0	0	0	2	0	1	0	0	0	0	0	0	0	0	0	0	0	0	0	0	0	2	0	1	0	0	0	1	0	0	d__Bacteria; p__Proteobacteria; c__Deltaproteobacteria; o__Myxococcales; f__Polyangiaceae; g__Pajaroellobacter; s__metagenome
OTU_1322	3	7	8	3	7	5	8	7	20	17	2	3	4	4	3	2	0	0	63	6	5	0	1	1	9	8	15	0	1	1	0	0	0	0	3	0	1	0	0	0	1	0	0	0	1	d__Bacteria; p__Acidobacteria; c__Subgroup_6; o__Subgroup_6_or; f__Subgroup_6_fa; g__Subgroup_6_ge
OTU_1323	1	0	0	2	0	1	1	4	0	0	0	1	0	0	0	0	0	0	0	0	0	0	0	0	0	0	0	0	0	0	0	0	0	0	0	0	0	0	0	0	0	0	0	0	0	d__Bacteria; p__Gemmatimonadetes; c__Gemmatimonadetes; o__Gemmatimonadales; f__Gemmatimonadaceae; g__Gemmatirosa
OTU_1324	1	1	2	2	0	1	0	6	3	4	2	5	4	2	3	0	1	18	31	2	13	3	1	0	3	1	6	0	1	3	4	6	0	11	2	2	16	3	16	17	47	0	39	9	11	d__Bacteria; p__Proteobacteria; c__Alphaproteobacteria; o__Rhizobiales; f__Xanthobacteraceae
OTU_1325	1	4	2	0	0	1	2	0	2	2	3	1	0	1	2	0	0	0	6	0	0	0	0	0	0	0	3	0	0	0	0	0	0	0	0	0	0	0	0	0	0	0	0	0	0	d__Bacteria; p__Verrucomicrobia; c__Verrucomicrobiae; o__Verrucomicrobiales; f__Verrucomicrobiaceae; g__uncultured; s__uncultured_Verrucomicrobia_bacterium
OTU_1326	0	0	0	0	0	0	0	0	0	0	0	0	0	0	0	0	0	2	0	0	0	0	0	0	0	0	0	0	0	0	10	7	48	0	0	0	4	0	35	1	6	1	29	11	11	d__Bacteria; p__Verrucomicrobia; c__Verrucomicrobiae; o__Chthoniobacterales
OTU_1327	0	0	0	0	0	0	2	3	1	1	0	0	1	0	0	3	0	0	124	17	14	5	1	2	19	5	42	0	0	0	0	0	0	2	9	1	2	4	0	3	0	1	0	0	0	d__Bacteria; p__Verrucomicrobia; c__Verrucomicrobiae; o__Chthoniobacterales; f__Xiphinematobacteraceae; g__Candidatus_Xiphinematobacter; s__uncultured_bacterium
OTU_1328	0	0	0	1	0	0	0	0	0	12	1	0	0	0	0	0	0	0	1	0	0	0	0	0	0	0	0	0	0	0	0	0	0	0	0	0	0	0	0	0	0	0	0	0	0	d__Bacteria; p__Bacteroidetes; c__Bacteroidia; o__Flavobacteriales; f__Flavobacteriaceae; g__Flavobacterium
OTU_1329	0	3	2	1	0	0	9	6	3	1	3	2	3	2	0	0	0	0	2	1	0	0	0	1	0	0	0	0	0	0	0	0	0	0	0	0	0	0	0	0	0	0	0	0	0	d__Bacteria; p__Proteobacteria; c__Alphaproteobacteria; o__Elsterales; f__uncultured; g__uncultured_ge
OTU_133	0	0	3	15	15	20	5	4	69	4	3	13	27	14	998	0	0	0	2	1	1	0	0	0	2	0	2	0	0	0	0	0	0	1	9	1	0	0	0	0	0	0	0	1	0	d__Bacteria; p__Firmicutes; c__Bacilli; o__Bacillales; f__Bacillaceae; g__Bacillus
OTU_1330	0	0	0	0	0	0	0	0	0	0	0	0	0	0	0	1	0	1	0	16	0	5	2	6	11	1	17	0	0	0	0	0	0	0	0	0	0	0	0	0	0	0	0	0	0	Unclassified
OTU_1331	0	1	1	0	0	0	1	0	2	0	0	1	3	2	0	0	0	0	2	0	0	0	0	0	0	0	0	0	0	0	0	0	0	0	0	0	0	0	0	0	0	0	0	0	0	d__Bacteria; p__Proteobacteria; c__Deltaproteobacteria; o__Myxococcales; f__P3OB_42; g__P3OB_42_ge
OTU_1332	3	4	2	0	1	1	6	2	7	2	2	2	3	1	2	0	0	0	1	0	0	0	0	0	0	0	0	0	0	0	0	0	0	0	0	0	0	0	0	0	0	0	0	0	0	d__Bacteria; p__Proteobacteria; c__Deltaproteobacteria; o__Myxococcales; f__Haliangiaceae; g__Haliangium
OTU_1333	0	4	3	0	1	0	1	1	0	1	2	0	1	1	0	0	0	1	0	0	0	0	0	0	0	0	0	0	0	0	34	7	20	1	1	1	8	3	9	2	23	9	1	1	0	d__Bacteria; p__Actinobacteria; c__Actinobacteria; o__Micrococcales
OTU_1334	0	0	0	0	0	0	0	0	0	0	0	0	0	0	0	0	0	0	0	0	0	0	0	0	0	0	1	0	0	0	20	36	24	0	0	0	7	1	6	0	3	1	1	0	0	d__Bacteria; p__Deinococcus_Thermus; c__Deinococci; o__Deinococcales; f__Deinococcaceae; g__Deinococcus
OTU_1335	1	1	2	1	0	0	0	0	2	2	1	1	1	1	0	0	0	0	0	0	0	0	0	0	0	0	0	0	0	0	0	0	0	0	0	0	0	0	0	0	0	0	0	0	0	d__Bacteria; p__Dependentiae; c__Babeliae; o__Babeliales; f__Vermiphilaceae; g__Vermiphilaceae_ge
OTU_1336	2	6	0	0	0	0	0	0	0	0	1	0	0	0	2	0	0	0	0	0	0	0	0	0	0	0	0	0	0	0	0	0	0	0	0	0	0	0	0	0	0	0	0	0	0	Unclassified
OTU_1337	1	1	1	1	2	1	0	2	5	1	1	1	0	0	0	0	0	0	0	0	0	0	0	0	0	0	1	0	0	0	0	0	0	0	0	0	0	0	0	0	0	0	0	0	0	d__Bacteria; p__Armatimonadetes; c__uncultured; o__uncultured_or; f__uncultured_fa; g__uncultured_ge
OTU_1338	0	0	0	0	2	0	0	0	0	0	0	0	0	0	0	1	2	27	0	0	6	25	10	0	0	0	22	0	0	15	0	0	0	0	0	0	1	2	2	0	0	0	0	1	0	d__Bacteria; p__Proteobacteria; c__Alphaproteobacteria; o__Sphingomonadales; f__Sphingomonadaceae; g__Sphingomonas
OTU_1339	1	2	2	0	2	1	0	1	4	3	0	0	2	2	0	1	0	0	15	1	0	0	1	0	4	1	5	0	0	0	0	0	0	0	3	0	1	0	0	0	0	0	0	0	0	d__Bacteria; p__Acidobacteria; c__Subgroup_6; o__Subgroup_6_or; f__Subgroup_6_fa; g__Subgroup_6_ge
OTU_134	22	31	18	32	28	45	69	24	19	83	36	11	53	69	45	16	2	47	10	16	44	24	11	2	12	6	22	25	70	39	1	5	0	8	0	2	5	5	2	9	9	3	23	83	44	d__Bacteria; p__Proteobacteria; c__Alphaproteobacteria; o__Rhizobiales; f__Rhizobiaceae
OTU_1340	0	0	0	0	4	1	0	0	0	0	0	1	4	0	0	0	0	0	0	0	0	0	0	0	0	0	0	0	0	0	0	0	0	0	0	0	0	0	0	0	0	0	0	0	0	d__Bacteria
OTU_1341	1	2	0	1	0	0	2	3	0	2	1	1	4	2	1	0	0	0	0	0	0	0	0	0	0	0	1	0	0	0	0	0	0	0	0	0	0	0	0	0	0	0	0	0	0	d__Bacteria; p__Proteobacteria; c__Alphaproteobacteria; o__Acetobacterales; f__Acetobacteraceae
OTU_1343	0	0	0	0	0	0	0	0	0	0	0	0	0	0	0	0	0	0	0	0	0	0	0	0	0	0	0	0	0	1	1	1	0	0	0	75	1	0	0	6	2	0	0	0	1	d__Bacteria; p__Proteobacteria; c__Gammaproteobacteria; o__Xanthomonadales; f__Xanthomonadaceae; g__Xanthomonas; s__Xanthomonas_campestris_pv._campestris
OTU_1344	2	3	3	4	1	6	3	4	4	5	4	4	1	2	7	0	0	0	2	0	1	0	0	0	0	0	0	0	0	0	0	0	0	0	0	0	0	0	0	0	1	0	0	0	0	d__Bacteria; p__Actinobacteria; c__Acidimicrobiia; o__uncultured; f__uncultured_fa; g__uncultured_ge; s__uncultured_soil_bacterium
OTU_1345	0	1	0	0	1	0	1	0	0	3	0	0	1	2	0	0	0	0	0	1	2	0	0	9	1	2	1	0	0	0	0	1	1	0	4	2	2	4	1	0	1	4	1	1	1	Unclassified
OTU_1346	1	0	0	1	2	0	1	0	0	2	1	1	0	0	0	0	0	0	0	0	0	0	0	0	0	0	0	0	0	0	0	0	0	0	0	0	0	0	0	0	0	0	0	0	0	d__Bacteria; p__Planctomycetes; c__Phycisphaerae; o__Tepidisphaerales; f__WD2101_soil_group; g__WD2101_soil_group_ge
OTU_1347	0	0	0	4	0	0	0	0	0	1	2	0	0	11	0	0	0	0	0	0	0	0	0	0	0	0	0	0	0	0	0	0	0	0	0	0	0	1	0	0	0	1	0	0	0	Unclassified
OTU_1348	0	0	0	0	0	0	1	0	0	2	3	0	0	1	0	2	0	1	0	3	15	0	1	4	0	0	4	0	0	0	0	0	0	0	0	0	0	0	0	0	0	0	0	0	0	Unclassified
OTU_1349	0	0	0	0	0	0	0	0	0	0	0	0	0	0	0	0	0	5	0	7	5	27	0	0	6	0	39	8	0	1	9	0	0	0	0	0	0	0	1	4	1	1	0	1	0	d__Bacteria; p__Proteobacteria; c__Gammaproteobacteria
OTU_135	42	60	10	32	24	24	147	6	11	72	52	16	25	80	3	766	1123	702	863	354	510	1432	1693	1166	455	1233	783	970	237	1267	176	310	38	87	14	31	202	154	26	55	78	144	54	203	225	d__Bacteria; p__Bacteroidetes; c__Bacteroidia; o__Cytophagales; f__Hymenobacteraceae; g__Hymenobacter
OTU_1350	1	3	2	1	0	0	0	0	2	1	0	0	1	1	1	0	0	0	0	0	0	0	0	0	0	0	0	0	0	0	0	0	0	0	0	0	0	0	0	0	0	0	0	0	0	d__Bacteria; p__Gemmatimonadetes; c__Gemmatimonadetes; o__Gemmatimonadales; f__Gemmatimonadaceae; g__uncultured; s__uncultured_Gemmatimonadetes_bacterium
OTU_1351	1	2	3	4	0	1	0	0	0	1	3	0	0	0	0	0	0	0	0	1	1	1	2	0	0	0	1	0	0	0	1	0	0	0	1	5	0	0	0	11	4	0	9	75	21	d__Bacteria; p__Proteobacteria; c__Alphaproteobacteria; o__Acetobacterales; f__Acetobacteraceae; g__Roseomonas
OTU_1352	5	4	10	9	7	10	16	15	22	18	5	9	9	7	8	0	0	0	5	0	0	0	0	0	0	0	2	0	0	0	0	0	0	0	3	0	0	0	0	0	0	0	0	0	0	d__Bacteria; p__Proteobacteria; c__Alphaproteobacteria; o__Sphingomonadales; f__Sphingomonadaceae; g__Sphingomonas
OTU_1353	3	3	5	3	4	1	1	2	9	4	1	0	4	1	1	0	0	0	0	0	0	0	0	0	0	0	0	0	0	0	0	0	0	0	0	0	0	0	0	0	0	0	0	0	0	d__Bacteria; p__Armatimonadetes; c__Fimbriimonadia; o__Fimbriimonadales; f__Fimbriimonadaceae; g__Fimbriimonadaceae_ge; s__uncultured_bacterium
OTU_1354	5	6	5	8	3	1	9	13	19	8	3	5	8	1	2	0	0	0	16	0	0	0	0	0	0	0	2	0	0	0	0	0	0	0	0	0	0	0	0	0	1	0	0	0	0	d__Bacteria; p__Bacteroidetes; c__Bacteroidia; o__Chitinophagales; f__Chitinophagaceae
OTU_1356	1	2	0	10	3	0	0	3	2	3	0	2	0	0	2	0	0	0	8	0	0	0	0	0	0	0	0	0	0	0	0	0	0	0	0	0	0	0	0	0	0	0	0	1	0	d__Bacteria; p__Proteobacteria; c__Deltaproteobacteria; o__Bdellovibrionales; f__Bdellovibrionaceae; g__OM27_clade
OTU_1357	0	1	0	0	0	7	0	0	0	0	1	1	0	2	0	0	0	2	0	0	0	0	0	0	0	0	0	0	0	0	0	0	0	0	0	0	0	8	1	0	3	0	0	0	0	d__Bacteria; p__Bacteroidetes; c__Bacteroidia; o__Cytophagales; f__Spirosomaceae; g__Spirosoma
OTU_1358	1	1	3	0	2	2	2	8	4	2	1	0	4	2	1	0	0	0	1	0	0	0	0	0	0	0	0	0	0	0	0	0	0	0	0	0	0	0	0	0	0	0	0	0	0	d__Bacteria; p__Bacteroidetes; c__Bacteroidia; o__Cytophagales; f__Microscillaceae
OTU_1359	4	16	5	4	3	6	6	9	22	21	6	3	9	3	1	0	0	0	6	0	2	0	0	3	0	0	6	0	0	0	0	0	0	1	0	0	0	0	0	0	0	0	0	0	0	d__Bacteria; p__Planctomycetes; c__Phycisphaerae; o__Tepidisphaerales; f__WD2101_soil_group; g__WD2101_soil_group_ge
OTU_136	2	0	9	10	2	0	12	1	3	4	1	0	1	9	0	704	488	892	5	56	473	333	509	525	72	118	538	1381	2229	591	32	43	65	84	3	15	76	59	11	12	78	26	91	807	389	d__Bacteria; p__Bacteroidetes; c__Bacteroidia; o__Cytophagales; f__Spirosomaceae; g__Spirosoma; s__Spirosoma_radiotolerans
OTU_1360	1	3	6	0	1	0	2	1	1	1	1	1	2	0	0	0	0	0	1	1	0	0	0	0	0	0	1	0	0	0	0	0	0	0	1	0	0	0	0	0	0	0	0	0	0	d__Bacteria; p__Proteobacteria; c__Deltaproteobacteria; o__Myxococcales; f__Haliangiaceae; g__Haliangium; s__uncultured_Nannocystineae_bacterium
OTU_1361	1	0	0	1	2	0	4	1	5	1	0	1	1	1	0	0	0	0	0	0	0	0	0	0	0	0	0	0	0	0	0	0	0	0	0	0	0	0	0	0	0	0	0	0	0	d__Bacteria; p__Actinobacteria; c__0319_7L14; o__0319_7L14_or; f__0319_7L14_fa; g__0319_7L14_ge; s__uncultured_actinobacterium
OTU_1362	6	5	4	3	2	3	7	6	9	5	5	4	5	1	4	0	0	0	7	0	1	0	0	1	2	2	9	0	0	0	0	0	0	0	4	0	0	0	0	0	1	0	0	0	0	d__Bacteria; p__Chloroflexi; c__Chloroflexia; o__Chloroflexales; f__Roseiflexaceae; g__uncultured; s__uncultured_bacterium
OTU_1364	4	8	5	2	0	1	6	0	0	2	1	0	1	1	0	0	0	0	0	0	1	0	0	0	0	6	3	0	0	0	0	0	0	1	0	0	0	0	0	0	0	0	0	0	0	d__Bacteria; p__Actinobacteria; c__Actinobacteria; o__Micrococcales; f__Dermabacteraceae; g__Brachybacterium; s__uncultured_bacterium
OTU_1365	0	2	1	1	2	1	2	1	3	2	1	1	2	1	0	0	0	0	4	0	0	0	0	0	0	0	2	0	0	0	0	0	0	0	1	0	0	0	0	0	0	0	0	0	0	d__Bacteria; p__Acidobacteria; c__Subgroup_6
OTU_1366	2	0	0	0	0	0	0	0	0	0	1	0	4	2	0	0	0	0	0	0	0	0	0	0	0	0	0	0	0	0	0	0	0	0	0	0	0	0	0	0	0	0	0	0	0	d__Bacteria; p__Chlamydiae; c__Chlamydiae; o__Chlamydiales; f__Parachlamydiaceae; g__Neochlamydia
OTU_1367	1	1	0	2	1	1	4	3	6	6	4	1	3	1	0	0	0	0	1	2	0	0	0	0	0	0	0	0	0	0	0	0	0	1	0	0	0	0	0	0	0	0	0	0	0	d__Bacteria; p__Verrucomicrobia; c__Verrucomicrobiae; o__Opitutales; f__Opitutaceae
OTU_1368	0	3	2	1	1	1	3	3	7	1	1	2	1	3	1	0	0	0	0	0	0	0	0	0	1	0	1	0	0	0	0	0	0	0	0	0	0	0	0	3	0	0	0	0	0	d__Bacteria; p__Proteobacteria; c__Deltaproteobacteria; o__Myxococcales; f__BIrii41; g__BIrii41_ge; s__uncultured_bacterium
OTU_1369	0	0	1	0	0	3	0	1	0	5	10	0	1	0	0	0	0	1	2	1	0	0	0	0	0	0	0	0	0	0	0	0	0	0	0	0	0	0	0	0	2	1	0	0	0	d__Bacteria; p__Bacteroidetes; c__Bacteroidia; o__Flavobacteriales; f__Weeksellaceae; g__Chryseobacterium
OTU_137	0	2	3	5	0	2	8	10	514	0	0	1	3	2	1	0	0	0	0	0	0	0	0	0	0	0	0	0	0	0	0	0	0	0	0	0	0	0	0	0	0	0	0	0	0	d__Bacteria; p__Firmicutes; c__Bacilli; o__Bacillales; f__Family_XII; g__Exiguobacterium; s__Exiguobacterium_aurantiacum
OTU_1370	1	2	3	0	0	5	1	3	5	2	2	0	2	0	1	0	0	0	0	0	0	0	0	0	0	0	0	0	0	0	0	0	0	0	0	0	0	0	0	0	0	0	0	0	0	d__Bacteria; p__Chloroflexi; c__Anaerolineae; o__SBR1031; f__SBR1031_fa; g__SBR1031_ge; s__uncultured_soil_bacterium
OTU_1371	1	0	3	1	1	1	2	0	4	0	1	2	1	3	1	0	0	0	3	0	0	0	0	0	0	0	0	0	0	0	0	0	0	0	0	0	0	0	0	0	0	0	0	1	0	d__Bacteria; p__Proteobacteria; c__Alphaproteobacteria; o__Rhizobiales; f__Amb_16S_1323; g__Amb_16S_1323_ge; s__uncultured_bacterium
OTU_1372	1	9	0	0	0	0	0	0	0	1	0	0	0	1	0	0	0	0	0	0	0	0	0	0	0	0	0	0	0	0	0	0	0	0	0	0	0	0	0	0	0	0	0	0	0	d__Bacteria; p__Actinobacteria; c__Acidimicrobiia
OTU_1374	1	4	2	1	2	1	4	5	25	5	3	1	8	1	0	0	0	0	0	0	0	0	0	0	0	0	0	0	0	0	0	0	0	0	0	0	0	0	0	0	0	0	0	0	0	d__Bacteria; p__Planctomycetes; c__Phycisphaerae; o__Tepidisphaerales; f__WD2101_soil_group; g__WD2101_soil_group_ge; s__uncultured_planctomycete
OTU_1375	0	3	1	1	4	0	1	2	5	6	1	0	0	2	0	0	0	0	1	1	0	0	0	0	0	0	1	0	0	0	0	0	0	0	0	0	0	0	0	0	1	0	0	0	0	d__Bacteria; p__Planctomycetes; c__Planctomycetacia; o__Pirellulales; f__Pirellulaceae; g__Rhodopirellula; s__uncultured_Planctomycetaceae_bacterium
OTU_1376	2	0	1	0	0	0	2	0	0	3	0	1	4	3	2	0	0	0	1	0	0	0	0	0	0	0	1	0	0	0	0	0	0	0	0	0	0	0	0	0	0	0	0	0	0	Unclassified
OTU_1377	0	5	1	1	1	2	1	2	3	1	0	0	0	0	0	0	0	0	0	0	0	0	0	0	0	0	0	0	0	0	0	0	0	0	0	0	0	0	0	0	0	0	0	0	0	d__Bacteria; p__Firmicutes; c__Clostridia; o__Clostridiales; f__Lachnospiraceae; g__Lachnospiraceae_ge; s__uncultured_Eubacterium_sp.
OTU_1378	0	1	0	1	0	1	0	0	0	4	1	0	4	0	0	0	0	0	0	0	0	0	0	0	0	0	1	0	0	0	0	0	0	1	0	0	0	0	0	0	0	0	0	0	0	Unclassified
OTU_1379	0	0	0	3	0	0	0	0	0	3	0	2	1	1	0	0	0	0	0	0	0	0	0	0	0	0	0	0	0	0	0	0	0	0	0	0	0	0	0	0	0	0	0	0	0	d__Bacteria; p__Proteobacteria; c__Deltaproteobacteria; o__Oligoflexales; f__Oligoflexaceae; g__uncultured
OTU_138	0	7	3	0	1	1	0	1	0	413	12	3	5	0	0	0	0	0	0	0	0	0	0	0	0	0	0	0	0	0	0	0	0	0	0	0	0	0	0	0	0	0	0	0	0	d__Bacteria; p__Deinococcus_Thermus; c__Deinococci; o__Deinococcales; f__Deinococcaceae; g__Deinococcus; s__Deinococcus_proteolyticus_MRP
OTU_1380	0	0	3	0	0	1	2	3	3	5	0	1	1	0	2	0	0	0	0	1	0	0	0	0	1	0	0	0	0	0	0	0	0	0	0	0	0	0	0	0	1	0	0	0	0	d__Bacteria; p__Actinobacteria; c__Nitriliruptoria; o__Euzebyales; f__Euzebyaceae; g__uncultured; s__uncultured_bacterium
OTU_1381	0	0	1	0	0	0	10	0	0	0	0	1	2	0	1	0	0	0	4	0	0	0	0	0	0	0	0	0	0	0	0	0	0	0	0	0	0	0	0	0	0	0	0	0	0	d__Bacteria; p__Proteobacteria; c__Alphaproteobacteria; o__Rhizobiales; f__A0839; g__A0839_ge; s__uncultured_bacterium
OTU_1382	0	0	1	2	0	1	0	5	1	0	0	1	7	1	2	0	0	0	0	0	0	0	0	0	0	0	0	0	0	0	0	0	0	0	0	0	0	0	0	0	0	0	0	0	0	d__Bacteria; p__Bacteroidetes; c__Bacteroidia; o__Chitinophagales; f__Chitinophagaceae; g__Chitinophaga
OTU_1384	1	0	1	1	0	1	1	3	2	0	0	1	0	1	1	0	0	0	0	0	0	0	0	0	0	0	0	0	0	0	0	0	0	0	0	0	0	0	0	0	0	0	0	0	0	d__Bacteria
OTU_1385	0	0	0	2	1	1	5	3	13	4	1	0	3	0	0	0	0	5	1	0	6	0	0	0	0	0	0	0	0	0	0	4	0	0	0	0	5	4	5	0	18	0	3	0	0	d__Bacteria; p__Verrucomicrobia; c__Verrucomicrobiae; o__Chthoniobacterales; f__Chthoniobacteraceae; g__Chthoniobacter
OTU_1386	0	0	0	0	0	0	0	0	0	0	0	0	0	0	0	0	0	0	0	0	0	0	0	0	0	0	0	0	0	0	13	30	12	7	0	0	0	3	9	14	29	7	0	0	0	d__Bacteria; p__Bacteroidetes; c__Bacteroidia; o__Sphingobacteriales; f__Sphingobacteriaceae; g__Mucilaginibacter
OTU_1388	0	0	0	4	0	0	1	1	0	1	0	1	0	0	0	0	0	1	0	0	0	0	0	0	0	0	0	0	0	0	0	0	0	0	0	0	0	0	0	0	0	0	0	0	0	d__Bacteria; p__FBP; c__FBP_cl; o__FBP_or; f__FBP_fa; g__FBP_ge; s__uncultured_bacterium
OTU_1389	2	2	1	2	4	1	2	8	6	2	1	1	1	0	1	0	0	0	1	0	0	0	0	0	0	0	0	0	0	0	0	0	0	0	0	0	0	0	0	0	0	0	0	0	0	d__Bacteria; p__Actinobacteria; c__Actinobacteria; o__Streptosporangiales; f__Streptosporangiaceae
OTU_139	0	0	0	0	0	0	0	0	0	0	0	0	0	0	0	0	0	0	0	0	0	0	0	0	0	0	0	0	0	0	961	267	1581	0	0	0	0	2	0	0	8	143	10	8	0	Unclassified
OTU_1391	2	2	2	1	1	1	1	1	1	0	0	2	2	0	0	0	0	0	2	0	0	0	0	0	1	1	0	0	0	0	0	0	0	0	0	0	0	0	0	0	0	0	0	0	0	d__Bacteria; p__Actinobacteria; c__Acidimicrobiia; o__Microtrichales; f__Iamiaceae; g__Iamia; s__uncultured_actinobacterium
OTU_1392	0	0	0	0	0	0	0	0	0	0	0	0	0	0	0	0	0	0	0	0	0	0	0	0	0	0	0	0	0	0	78	45	6	238	60	167	160	76	8	95	204	204	1	2	23	d__Bacteria; p__Proteobacteria; c__Alphaproteobacteria; o__Rhizobiales; f__Beijerinckiaceae; g__1174_901_12
OTU_1393	0	3	2	0	0	3	1	2	1	0	0	1	0	0	1	0	0	0	0	0	0	0	0	0	0	0	0	0	0	0	0	0	0	0	0	0	0	0	0	0	0	0	0	0	0	d__Bacteria; p__Proteobacteria; c__Deltaproteobacteria; o__MBNT15; f__MBNT15_fa; g__MBNT15_ge; s__uncultured_Myxococcales_bacterium
OTU_1394	4	3	1	2	1	1	3	4	5	2	3	0	2	2	1	0	0	0	8	2	1	2	0	0	1	2	1	0	0	0	0	0	0	0	0	0	1	0	0	1	0	0	0	0	1	d__Bacteria; p__Proteobacteria; c__Deltaproteobacteria; o__Myxococcales; f__BIrii41; g__BIrii41_ge
OTU_1396	0	2	3	0	0	2	2	0	1	1	1	0	4	1	0	0	0	0	0	2	0	0	0	0	0	0	0	0	0	0	0	0	0	0	0	0	0	0	0	0	0	0	0	0	0	d__Bacteria; p__Verrucomicrobia; c__Verrucomicrobiae; o__Pedosphaerales; f__Pedosphaeraceae; g__Pedosphaeraceae_ge; s__uncultured_bacterium
OTU_1397	1	2	0	1	0	1	1	1	3	1	0	0	2	0	0	0	0	0	2	0	0	0	0	0	1	0	0	0	0	0	0	0	0	0	0	0	0	0	0	0	0	0	0	0	0	d__Bacteria; p__Bacteroidetes; c__Ignavibacteria; o__OPB56; f__OPB56_fa; g__OPB56_ge
OTU_1398	2	0	0	2	3	1	1	0	0	0	3	0	0	0	1	0	0	0	0	0	1	0	0	0	0	0	0	0	0	0	0	0	0	0	0	0	0	0	0	0	0	0	0	0	0	d__Bacteria; p__Gemmatimonadetes; c__Gemmatimonadetes; o__Gemmatimonadales; f__Gemmatimonadaceae; g__Gemmatirosa
OTU_14	105	66	28	73	112	27	123	5	20	987	996	61	58	574	17	320	41	4	159	503	465	97	2	39	175	109	518	46	39	18	0	0	0	15	7	18	2	6	1	2	12	7	0	0	0	Unclassified
OTU_140	0	0	0	0	0	0	0	0	0	0	0	0	0	0	0	0	0	0	0	0	0	0	0	0	0	0	0	0	0	0	108	71	517	6	1310	30	71	64	28	33	570	324	118	598	1290	d__Bacteria
OTU_1400	1	0	0	0	1	1	1	1	0	1	0	0	3	0	1	0	0	0	0	0	0	0	0	0	0	0	0	0	0	0	0	0	0	0	0	0	0	0	0	0	0	0	0	0	0	d__Bacteria; p__FBP; c__FBP_cl; o__FBP_or; f__FBP_fa; g__FBP_ge; s__uncultured_soil_bacterium
OTU_1401	0	1	0	2	1	2	1	1	1	0	1	0	3	1	1	0	0	0	0	0	0	0	0	0	0	0	0	0	0	0	0	0	0	0	0	0	0	0	0	0	0	0	0	0	0	d__Bacteria; p__Proteobacteria; c__Gammaproteobacteria; o__Diplorickettsiales; f__Diplorickettsiaceae; g__Aquicella; s__uncultured_bacterium
OTU_1402	0	2	0	1	1	0	2	1	0	0	0	0	3	0	0	0	0	0	1	4	0	0	0	0	0	0	0	0	0	0	0	0	0	0	0	0	0	0	0	0	0	0	0	0	0	d__Bacteria; p__Proteobacteria; c__Deltaproteobacteria; o__Bdellovibrionales; f__Bdellovibrionaceae; g__OM27_clade
OTU_1403	0	1	2	0	1	0	1	3	1	2	1	0	0	0	0	0	0	0	0	0	0	0	0	0	0	0	0	0	0	0	0	0	0	0	0	0	0	0	0	0	0	0	0	0	0	d__Bacteria; p__Proteobacteria
OTU_1404	1	1	2	0	0	0	2	0	4	0	0	3	1	0	0	0	0	0	0	0	0	0	0	0	0	0	0	0	0	0	0	0	0	0	0	0	0	0	0	0	0	0	0	0	0	d__Bacteria; p__Bacteroidetes; c__Bacteroidia; o__Sphingobacteriales; f__env.OPS_17; g__env.OPS_17_ge
OTU_1405	0	3	1	2	4	0	1	2	2	0	1	0	0	0	0	0	0	46	0	2	3	0	0	0	0	0	0	0	0	0	4	1	2	3	0	0	33	19	2	4	3	0	14	0	0	d__Bacteria; p__Planctomycetes; c__Phycisphaerae; o__Tepidisphaerales
OTU_1406	2	3	0	0	2	2	3	2	3	1	1	1	3	0	0	0	0	0	0	0	0	0	0	0	0	0	0	0	0	0	0	0	0	0	0	0	0	0	0	0	0	0	0	0	0	d__Bacteria; p__Chloroflexi; c__Chloroflexia; o__Kallotenuales; f__AKIW781; g__AKIW781_ge
OTU_1407	0	2	1	0	0	1	2	1	0	1	0	0	0	0	0	119	71	78	11	21	157	129	83	54	53	106	108	74	12	31	15	26	5	18	7	9	63	35	57	18	35	30	9	39	30	d__Bacteria; p__Proteobacteria; c__Alphaproteobacteria; o__Sphingomonadales; f__Sphingomonadaceae
OTU_1409	2	2	1	1	2	0	1	3	8	1	2	1	1	2	0	0	0	0	0	0	0	0	0	0	0	0	0	0	0	0	0	0	0	0	0	0	0	0	0	0	0	0	0	0	0	d__Bacteria; p__Chloroflexi; c__Chloroflexia; o__Kallotenuales; f__AKIW781; g__AKIW781_ge
OTU_141	32	54	42	32	41	46	69	59	143	58	33	24	66	26	21	0	0	0	5	2	0	0	0	0	0	0	0	0	0	0	0	0	0	0	6	0	0	0	0	0	0	0	0	0	0	d__Bacteria; p__Gemmatimonadetes; c__Gemmatimonadetes; o__Gemmatimonadales; f__Gemmatimonadaceae; g__uncultured; s__uncultured_Gemmatimonadetes_bacterium
OTU_1410	0	0	0	4	1	0	0	0	2	2	0	2	2	0	3	0	0	21	12	1	13	2	1	0	1	2	1	0	2	7	3	0	0	14	0	1	2	2	2	6	6	1	18	14	10	d__Bacteria; p__Actinobacteria; c__Actinobacteria; o__Propionibacteriales; f__Nocardioidaceae; g__Nocardioides
OTU_1411	3	1	0	1	0	1	2	0	5	3	0	0	1	2	1	0	0	0	1	0	0	0	0	0	0	0	0	0	0	0	0	0	0	0	0	0	0	0	0	0	0	0	0	0	0	d__Bacteria; p__Verrucomicrobia; c__Verrucomicrobiae; o__Pedosphaerales; f__Pedosphaeraceae; g__Pedosphaeraceae_ge
OTU_1412	0	0	0	0	0	0	0	0	0	0	0	0	0	0	0	6	0	59	1	2	11	4	0	0	0	3	1	9	4	7	0	0	0	0	0	0	1	0	0	0	0	0	0	0	0	d__Bacteria; p__Bacteroidetes; c__Bacteroidia; o__Cytophagales; f__Spirosomaceae; g__Spirosoma
OTU_1413	1	0	0	0	0	0	1	0	2	0	1	2	1	0	0	0	0	0	0	0	0	0	0	0	0	0	0	0	0	0	0	0	0	0	0	0	0	0	0	0	0	0	0	0	0	d__Bacteria; p__Chloroflexi; c__Chloroflexia; o__Chloroflexales; f__Roseiflexaceae
OTU_1414	0	8	0	1	2	0	1	3	3	0	1	0	0	0	0	0	0	0	0	0	0	0	0	0	0	0	0	0	0	0	0	0	0	0	0	0	0	0	0	0	0	0	0	0	0	d__Bacteria; p__FBP; c__FBP_cl; o__FBP_or; f__FBP_fa; g__FBP_ge; s__uncultured_bacterium
OTU_1415	1	0	0	1	1	0	2	0	0	2	0	0	1	0	0	0	0	0	0	0	0	0	0	0	2	0	0	0	0	0	0	0	0	0	0	0	0	0	0	0	0	0	0	0	0	d__Bacteria; p__Proteobacteria; c__Deltaproteobacteria; o__Bdellovibrionales; f__Bdellovibrionaceae; g__Bdellovibrio
OTU_1416	4	4	1	1	1	1	3	1	2	6	2	3	3	0	1	0	0	0	0	0	0	0	0	0	1	0	0	0	0	0	0	0	0	0	0	0	0	0	0	0	0	0	0	0	0	d__Bacteria; p__Proteobacteria; c__Alphaproteobacteria; o__Rhizobiales; f__uncultured; g__uncultured_ge; s__uncultured_Rhizobiales_bacterium
OTU_1417	1	3	5	0	1	2	1	7	6	3	1	1	5	3	0	0	0	0	0	0	0	0	0	0	2	1	0	0	0	0	0	0	0	0	0	0	0	0	0	0	0	0	0	0	0	d__Bacteria; p__Actinobacteria; c__Thermoleophilia; o__Solirubrobacterales; f__67_14; g__67_14_ge
OTU_1418	0	1	1	2	1	0	0	0	0	0	0	0	0	0	0	0	0	54	0	0	38	0	0	0	0	0	0	0	1	0	1	0	0	0	1	0	2	0	1	4	1	0	6	0	0	d__Bacteria; p__Bacteroidetes; c__Bacteroidia; o__Chitinophagales; f__Chitinophagaceae
OTU_1419	0	0	0	0	0	0	0	0	0	0	0	0	0	0	0	0	0	1	0	0	0	0	0	0	0	0	0	0	3	1	0	6	0	0	0	0	3	1	3	1	2	0	13	7	55	d__Bacteria; p__Bacteroidetes; c__Bacteroidia; o__Cytophagales
OTU_1420	1	0	0	4	2	0	0	5	2	5	0	2	0	0	1	0	0	0	0	0	0	0	0	0	0	0	0	0	0	0	0	0	0	0	0	0	0	0	0	0	0	0	0	0	0	d__Bacteria; p__Chloroflexi
OTU_1421	0	0	0	0	0	0	0	0	0	0	0	0	0	0	0	0	0	0	0	0	0	0	0	0	0	0	0	0	0	0	11	9	9	45	23	8	0	30	4	0	0	2	0	0	0	Unclassified
OTU_1422	2	4	1	3	0	2	4	3	1	5	1	1	1	0	2	0	0	0	7	0	2	0	0	0	2	1	3	0	1	0	0	0	0	0	0	0	0	0	0	0	0	0	0	0	0	d__Bacteria; p__Proteobacteria; c__Alphaproteobacteria; o__Rhizobiales; f__Hyphomicrobiaceae; g__Hyphomicrobium
OTU_1423	0	2	0	0	0	0	5	5	5	3	5	2	0	1	1	0	1	0	0	1	0	0	1	1	1	0	0	0	0	0	0	0	0	0	0	0	1	0	0	0	0	0	0	0	0	d__Bacteria; p__Chloroflexi; c__Chloroflexia; o__Thermomicrobiales; f__JG30_KF_CM45; g__JG30_KF_CM45_ge
OTU_1424	0	0	0	0	0	0	0	0	0	0	0	0	0	0	0	0	0	23	0	0	27	0	1	0	7	0	1	0	16	8	0	0	0	6	0	0	12	5	0	2	9	1	1	5	0	d__Bacteria; p__Bacteroidetes; c__Bacteroidia; o__Cytophagales; f__Spirosomaceae; g__Spirosoma
OTU_1425	18	21	15	7	20	10	22	29	36	21	12	7	19	8	5	0	0	0	5	0	0	0	0	0	0	0	0	0	0	0	0	0	0	0	0	0	0	0	0	0	0	0	0	0	0	d__Bacteria; p__Actinobacteria; c__Acidimicrobiia; o__IMCC26256; f__IMCC26256_fa; g__IMCC26256_ge
OTU_1426	3	1	1	0	0	0	1	1	3	1	0	5	0	0	0	0	0	0	0	3	0	0	0	0	27	3	0	0	0	0	0	0	0	0	1	0	0	2	0	1	1	1	0	0	1	d__Bacteria; p__Firmicutes; c__Bacilli; o__Lactobacillales; f__Enterococcaceae; g__Enterococcus
OTU_1427	4	1	3	3	3	4	3	1	7	2	0	0	3	2	3	0	0	0	0	0	0	0	0	0	0	0	0	0	0	0	0	0	0	0	0	0	0	0	0	0	0	0	0	0	0	d__Bacteria; p__Acidobacteria; c__Blastocatellia_Subgroup_4; o__Pyrinomonadales; f__Pyrinomonadaceae; g__RB41
OTU_1428	1	3	0	1	1	1	2	0	3	0	0	0	2	0	0	0	0	0	0	0	0	0	0	0	0	0	0	0	0	0	0	0	0	0	0	0	0	0	0	0	0	0	0	0	0	d__Bacteria; p__Planctomycetes; c__Phycisphaerae; o__Phycisphaerales; f__Phycisphaeraceae; g__SM1A02
OTU_1429	1	4	2	3	3	4	4	7	10	0	1	0	6	4	0	0	0	0	0	0	0	0	0	0	0	0	0	0	0	0	0	0	0	0	0	0	0	0	0	1	0	0	0	0	0	d__Bacteria; p__Gemmatimonadetes; c__S0134_terrestrial_group; o__S0134_terrestrial_group_or; f__S0134_terrestrial_group_fa; g__S0134_terrestrial_group_ge
OTU_143	860	884	829	531	833	652	2014	288	289	855	935	191	972	1213	371	458	459	1224	231	366	772	189	146	109	308	401	463	637	202	932	8	9	3	48	1	16	5	3	2	64	34	18	50	258	117	d__Bacteria; p__Proteobacteria; c__Alphaproteobacteria; o__Rhizobiales; f__Beijerinckiaceae; g__Methylobacterium; s__Methylobacterium_adhaesivum
OTU_1430	0	4	2	0	2	0	2	1	3	2	0	0	0	0	0	0	0	0	0	0	0	0	0	0	0	0	1	0	0	0	0	0	0	0	0	0	0	0	0	0	0	0	0	0	0	d__Bacteria; p__Chloroflexi; c__KD4_96; o__KD4_96_or; f__KD4_96_fa; g__KD4_96_ge; s__uncultured_bacterium
OTU_1431	1	1	2	0	3	2	3	3	3	3	5	8	1	6	1	0	0	0	0	0	0	0	0	0	0	0	0	0	0	0	0	0	0	0	0	0	0	0	0	0	0	0	0	0	0	d__Bacteria; p__Gemmatimonadetes; c__Longimicrobia; o__Longimicrobiales; f__Longimicrobiaceae; g__Longimicrobiaceae_ge; s__uncultured_bacterium
OTU_1432	0	0	0	0	0	0	0	0	0	0	0	0	0	0	0	0	0	0	0	0	0	0	0	0	0	0	0	0	0	0	0	0	10	0	0	0	3	1	1	1	0	0	8	13	50	d__Bacteria
OTU_1433	0	0	0	11	0	0	0	1	0	0	0	0	1	1	0	0	0	1	0	0	20	0	0	0	0	0	0	0	0	0	0	0	0	0	0	0	0	0	0	0	0	0	0	0	0	d__Bacteria; p__Verrucomicrobia; c__Verrucomicrobiae; o__Chthoniobacterales; f__Chthoniobacteraceae; g__Chthoniobacter
OTU_1434	0	0	0	0	0	0	0	0	0	0	0	0	0	0	0	0	0	0	0	0	0	0	0	0	0	0	0	0	0	0	33	4	1	1	0	1	0	0	0	1	1	2	3	0	1	d__Bacteria; p__Bacteroidetes; c__Bacteroidia; o__Cytophagales; f__Hymenobacteraceae; g__Hymenobacter
OTU_1435	2	5	9	0	0	0	1	0	0	0	1	0	1	2	0	0	0	0	0	0	0	0	0	0	0	0	0	0	0	0	0	0	0	0	0	0	0	0	0	0	0	0	0	0	0	d__Bacteria; p__Proteobacteria; c__Alphaproteobacteria; o__Acetobacterales; f__Acetobacteraceae; g__Craurococcus; s__uncultured_bacterium
OTU_1436	0	0	0	0	0	0	0	0	0	0	0	0	0	0	0	0	1	0	0	0	3	3	2	4	1	0	2	0	0	0	1	2	0	1	4	1	2	1	2	3	12	8	1	1	2	d__Bacteria; p__Proteobacteria; c__Deltaproteobacteria; o__Bdellovibrionales; f__Bdellovibrionaceae; g__Bdellovibrio
OTU_1438	2	0	0	1	1	0	3	1	1	1	0	2	1	0	1	0	0	0	4	0	0	0	0	1	0	0	2	0	0	0	0	0	0	0	0	0	0	0	0	1	0	0	0	0	0	d__Bacteria; p__Proteobacteria; c__Deltaproteobacteria; o__Myxococcales; f__Polyangiaceae; g__Polyangium
OTU_1439	0	0	0	0	0	0	0	1	0	0	0	0	0	0	0	0	0	2	0	0	2	0	1	0	0	0	1	0	0	0	7	4	5	22	0	0	23	7	5	8	12	4	83	68	114	d__Bacteria; p__Planctomycetes; c__Planctomycetacia; o__Isosphaerales; f__Isosphaeraceae; g__Singulisphaera
OTU_144	16	42	23	14	48	31	45	7	15	63	35	11	36	14	15	22	49	616	64	64	506	174	490	169	164	218	105	216	205	320	108	146	68	59	43	17	36	29	34	49	101	28	156	563	172	d__Bacteria; p__Actinobacteria; c__Actinobacteria; o__Frankiales; f__Nakamurellaceae; g__Nakamurella
OTU_1440	1	0	0	0	0	0	0	0	0	0	0	0	0	0	0	1	0	0	0	0	3	8	3	1	0	1	2	0	0	0	1	0	6	2	1	0	10	7	2	1	1	2	0	4	10	Unclassified
OTU_1441	5	6	1	1	0	2	2	1	3	1	2	1	0	1	0	0	0	0	1	0	0	0	0	0	0	0	0	0	0	0	0	0	0	0	1	0	0	0	0	0	0	0	0	0	0	d__Bacteria; p__Proteobacteria; c__Alphaproteobacteria; o__Azospirillales; f__Azospirillaceae
OTU_1442	0	0	1	0	0	0	0	3	0	2	3	0	0	0	1	0	0	0	0	0	0	0	0	0	0	0	0	0	0	0	0	0	0	0	0	0	0	0	0	0	0	0	0	0	0	d__Bacteria; p__Proteobacteria; c__Gammaproteobacteria; o__Cellvibrionales; f__Cellvibrionaceae
OTU_1443	0	3	3	1	1	0	1	1	3	1	0	0	1	0	2	0	0	0	0	0	0	0	0	0	0	0	0	0	0	0	0	0	0	0	0	0	0	0	0	0	0	0	0	0	0	d__Bacteria; p__Actinobacteria; c__Acidimicrobiia; o__Actinomarinales; f__uncultured; g__uncultured_ge
OTU_1444	0	1	0	1	1	0	1	2	4	4	3	1	1	0	0	0	0	0	1	1	0	0	0	0	0	0	1	0	0	0	0	0	0	0	0	0	0	0	0	0	1	0	0	0	0	d__Bacteria; p__Verrucomicrobia; c__Verrucomicrobiae; o__Verrucomicrobiales; f__Rubritaleaceae; g__Luteolibacter
OTU_1445	0	1	1	0	0	1	3	2	3	3	2	0	0	1	0	0	0	0	0	0	0	0	0	0	0	0	0	0	0	0	0	0	0	0	0	0	0	0	0	0	0	0	0	0	0	d__Bacteria; p__Proteobacteria; c__Deltaproteobacteria; o__Myxococcales; f__Haliangiaceae; g__Haliangium; s__uncultured_Haliangium_sp.
OTU_1446	0	0	0	1	1	0	0	0	0	0	0	0	0	0	0	0	0	0	0	0	0	0	0	0	0	2	0	0	0	0	0	6	0	1	0	0	1	1	0	0	3	0	2	69	1	d__Bacteria
OTU_1447	1	0	0	0	1	0	2	0	6	2	1	1	0	0	0	0	0	0	1	0	0	0	0	0	0	0	0	0	0	0	0	0	0	0	0	0	0	0	0	0	0	0	0	0	0	d__Bacteria; p__Bacteroidetes; c__Ignavibacteria; o__OPB56; f__OPB56_fa; g__OPB56_ge; s__metagenome
OTU_1449	1	4	0	1	2	7	1	1	0	0	2	2	2	0	1	29	0	14	6	3	100	52	11	8	1	6	116	74	15	53	23	15	38	1	1	0	2	27	34	9	3	2	24	1	74	d__Bacteria; p__Bacteroidetes; c__Bacteroidia; o__Cytophagales; f__Hymenobacteraceae; g__Hymenobacter
OTU_145	44	126	93	65	101	76	128	89	213	123	50	33	109	66	37	0	0	0	1	0	0	0	0	0	0	0	0	0	0	0	0	0	0	0	0	0	0	0	0	0	0	0	0	0	0	d__Bacteria; p__Gemmatimonadetes; c__Gemmatimonadetes; o__Gemmatimonadales; f__Gemmatimonadaceae; g__uncultured
OTU_1450	2	5	4	0	2	1	0	0	4	5	4	1	2	1	1	0	0	0	5	0	0	0	0	0	0	0	2	0	0	0	0	0	0	0	0	0	0	0	0	0	1	0	0	0	0	d__Bacteria; p__Bacteroidetes; c__Bacteroidia; o__Chitinophagales; f__Chitinophagaceae
OTU_1451	5	3	0	1	1	0	6	2	4	4	1	3	0	1	2	0	0	0	1	0	0	0	0	0	0	0	0	0	0	0	0	0	0	0	0	0	0	0	0	0	0	0	0	0	0	d__Bacteria; p__Proteobacteria; c__Gammaproteobacteria; o__Oceanospirillales; f__Pseudohongiellaceae; g__BIyi10; s__metagenome
OTU_1452	3	2	4	1	1	1	8	9	8	2	3	1	3	2	1	0	0	0	0	0	1	0	0	0	2	0	3	0	0	0	0	0	0	0	0	0	0	0	0	0	0	0	0	0	0	d__Bacteria; p__Acidobacteria; c__Acidobacteriia; o__Solibacterales; f__Solibacteraceae_Subgroup_3; g__Bryobacter
OTU_1453	6	3	3	8	12	5	4	8	10	7	6	13	4	5	5	0	0	0	1	0	0	0	0	0	0	0	0	0	0	0	0	0	0	0	0	0	0	0	0	0	2	0	0	0	0	d__Bacteria; p__Bacteroidetes; c__Bacteroidia; o__Chitinophagales; f__Chitinophagaceae; g__Flavisolibacter; s__uncultured_bacterium
OTU_1455	3	1	0	2	2	0	1	1	5	1	1	0	2	0	0	0	0	0	2	2	0	0	0	0	0	0	1	0	0	0	0	0	0	0	0	0	0	0	0	0	0	0	0	0	0	d__Bacteria; p__Planctomycetes; c__Phycisphaerae; o__Tepidisphaerales; f__WD2101_soil_group; g__WD2101_soil_group_ge
OTU_1456	1	1	1	1	0	0	2	3	0	6	0	1	1	1	0	0	0	0	2	0	0	0	0	0	1	0	1	0	0	0	0	0	0	0	0	0	0	0	0	0	0	0	0	0	0	d__Bacteria; p__Acidobacteria; c__Acidobacteriia; o__Solibacterales; f__Solibacteraceae_Subgroup_3; g__Bryobacter
OTU_1457	3	0	1	1	3	1	2	3	3	0	0	0	1	1	0	0	0	0	0	0	0	0	0	0	0	0	0	0	0	0	0	0	0	0	0	0	0	0	0	0	0	0	0	0	0	d__Bacteria; p__Proteobacteria; c__Deltaproteobacteria; o__Myxococcales; f__Haliangiaceae; g__Haliangium
OTU_1458	0	0	0	0	0	1	3	0	1	0	3	0	1	0	0	0	0	0	0	0	0	0	0	0	0	0	0	0	0	0	0	0	0	0	0	0	0	0	0	0	0	0	0	0	0	d__Bacteria; p__Proteobacteria
OTU_1459	0	0	0	1	2	0	2	0	0	0	1	0	0	1	0	3	0	1	0	5	5	3	0	3	2	35	4	1	2	0	1	0	0	0	0	0	2	1	2	0	0	0	0	1	0	d__Bacteria; p__Proteobacteria
OTU_146	11	7	10	0	9	3	10	0	2	263	1	0	16	14	17	0	0	0	0	5	0	0	0	0	2	1	3	0	0	0	0	0	0	0	0	1	0	0	0	0	4	0	0	0	0	d__Bacteria
OTU_1460	0	0	0	0	0	0	0	0	0	0	0	0	0	0	0	0	0	0	0	0	0	0	0	0	0	0	0	0	0	0	47	22	52	53	25	7	29	23	11	16	43	51	1	4	1	d__Bacteria; p__Acidobacteria; c__Acidobacteriia; o__Acidobacteriales; f__Acidobacteriaceae_Subgroup_1
OTU_1462	0	0	0	0	0	0	2	1	4	1	1	0	1	0	2	0	0	0	1	0	0	0	0	0	0	0	0	0	0	0	0	0	0	0	0	0	0	0	0	0	0	0	0	0	0	d__Bacteria; p__Chloroflexi; c__JG30_KF_CM66; o__JG30_KF_CM66_or; f__JG30_KF_CM66_fa; g__JG30_KF_CM66_ge; s__metagenome
OTU_1463	0	0	1	0	3	1	5	5	5	1	0	0	0	0	2	0	0	0	3	2	0	0	0	0	0	1	2	0	0	0	0	0	0	0	0	0	0	0	0	0	0	0	0	0	0	d__Bacteria; p__Chloroflexi; c__KD4_96; o__KD4_96_or; f__KD4_96_fa; g__KD4_96_ge
OTU_1465	1	1	4	0	1	0	1	1	2	2	1	2	1	0	2	0	0	0	0	0	0	0	0	0	1	0	0	0	0	0	0	0	0	0	0	0	0	0	0	0	0	0	0	0	0	d__Bacteria; p__Proteobacteria; c__Deltaproteobacteria; o__Myxococcales
OTU_1466	0	1	2	2	0	3	2	0	4	3	0	0	0	2	0	0	0	0	6	1	0	0	0	0	0	0	0	0	0	0	0	0	0	0	1	0	1	0	0	0	0	0	0	0	0	d__Bacteria; p__Acidobacteria; c__Subgroup_6; o__Subgroup_6_or; f__Subgroup_6_fa; g__Subgroup_6_ge
OTU_1467	0	0	0	0	0	0	0	0	0	0	0	0	0	0	0	0	0	0	0	0	0	0	0	0	0	0	0	0	0	0	0	0	0	6	27	3	1	3	0	3	7	1	0	0	0	Unclassified
OTU_1468	0	0	4	0	0	6	0	0	1	0	0	1	1	0	0	0	0	0	22	0	1	0	0	0	1	0	0	0	0	0	2	0	0	0	4	0	0	0	0	0	0	0	0	0	0	d__Bacteria; p__Proteobacteria; c__Gammaproteobacteria; o__Betaproteobacteriales; f__SC_I_84; g__SC_I_84_ge
OTU_1469	1	3	0	1	0	0	1	0	0	2	1	0	0	0	0	0	0	0	0	0	0	0	0	0	1	0	0	0	0	0	2	0	0	0	83	0	0	0	0	0	0	0	0	0	0	d__Bacteria; p__Actinobacteria; c__Actinobacteria; o__Micrococcales; f__Microbacteriaceae; g__Leucobacter
OTU_147	31	39	26	26	104	15	58	17	17	196	90	113	84	31	49	1	1	152	4	20	1435	3	6	5	347	22	262	2	13	2	0	0	0	36	1	0	0	0	0	0	1	1	0	14	0	d__Bacteria; p__Bacteroidetes; c__Bacteroidia; o__Cytophagales; f__Hymenobacteraceae; g__Hymenobacter
OTU_1470	0	0	0	0	0	0	0	0	0	0	0	0	0	0	0	0	4	0	0	8	0	0	0	61	11	4	2	0	0	2	0	0	0	0	0	0	0	0	0	0	0	0	0	0	0	d__Bacteria
OTU_1471	0	0	1	0	3	0	2	2	3	3	0	0	0	1	0	0	0	0	1	0	0	0	0	0	0	0	0	0	0	0	0	0	0	0	0	0	0	0	0	0	0	0	0	0	0	d__Bacteria; p__Acidobacteria
OTU_1472	2	3	1	1	2	2	1	3	3	0	0	1	1	0	0	0	0	0	3	0	0	0	0	0	1	0	0	0	0	0	0	0	0	0	3	0	0	0	0	0	0	0	0	0	0	d__Bacteria; p__Rokubacteria; c__NC10; o__Rokubacteriales; f__Rokubacteriales_fa; g__Rokubacteriales_ge; s__uncultured_bacterium
OTU_1473	1	2	0	6	1	0	0	1	0	0	1	0	0	0	0	1	0	6	0	0	4	3	1	0	1	2	0	2	2	2	7	7	3	3	0	2	1	0	1	1	10	4	1	0	5	d__Bacteria; p__Proteobacteria; c__Alphaproteobacteria; o__Rhizobiales; f__Beijerinckiaceae
OTU_1474	2	3	1	1	6	1	5	2	13	4	0	1	1	1	0	0	0	0	0	0	0	0	0	0	0	0	0	0	0	0	0	0	0	0	0	0	0	0	0	0	0	0	0	0	0	d__Bacteria; p__Actinobacteria; c__MB_A2_108; o__MB_A2_108_or; f__MB_A2_108_fa; g__MB_A2_108_ge
OTU_1475	1	0	3	2	2	0	1	1	3	0	0	1	5	2	1	0	0	0	0	0	0	0	0	0	0	0	0	0	0	0	0	0	0	0	0	0	0	0	0	0	0	0	0	0	0	d__Bacteria; p__Gemmatimonadetes; c__S0134_terrestrial_group; o__S0134_terrestrial_group_or; f__S0134_terrestrial_group_fa; g__S0134_terrestrial_group_ge; s__uncultured_bacterium
OTU_1476	0	2	1	1	1	2	0	4	4	2	1	1	0	1	0	0	0	0	0	0	0	0	0	0	0	0	0	0	0	0	0	0	0	0	0	0	0	0	0	0	0	0	0	0	0	d__Bacteria; p__Chloroflexi; c__Chloroflexia; o__Chloroflexales; f__Chloroflexaceae
OTU_1477	0	0	0	1	0	0	0	0	0	0	0	0	1	2	0	0	0	0	0	5	0	0	0	0	0	0	0	0	0	1	0	0	0	12	5	33	2	0	0	2	1	0	0	0	0	d__Bacteria; p__Firmicutes; c__Bacilli; o__Bacillales; f__Paenibacillaceae; g__Paenibacillus; s__Paenibacillus_chinensis
OTU_1478	0	0	0	0	0	0	0	0	0	0	0	0	0	0	0	1	0	0	0	0	0	0	0	2	7	0	0	0	1	0	1	1	1	0	20	0	10	12	0	0	3	1	0	6	0	d__Bacteria
OTU_1479	1	1	0	1	0	0	6	1	2	1	3	0	0	1	1	0	0	0	7	2	1	0	0	0	7	0	4	0	0	0	0	1	0	0	0	0	0	0	0	0	0	0	0	0	1	d__Bacteria; p__Proteobacteria; c__Deltaproteobacteria; o__Oligoflexales; f__Oligoflexaceae; g__Oligoflexus
OTU_148	58	154	16	128	41	10	14	6	21	55	82	42	9	27	6	0	0	0	0	3	8	1	1	3	1	6	0	1	2	0	0	0	0	0	0	0	0	0	0	0	0	0	0	0	0	d__Bacteria; p__Bacteroidetes; c__Bacteroidia; o__Cytophagales; f__Hymenobacteraceae; g__Adhaeribacter
OTU_1480	0	0	0	0	0	0	0	0	0	0	0	0	0	0	0	0	0	0	0	0	0	0	0	0	0	0	0	0	0	0	0	0	0	0	0	0	0	0	0	0	0	0	0	45	0	Unclassified
OTU_1481	0	4	1	0	0	0	1	4	6	1	0	0	0	0	1	0	0	0	0	0	0	0	0	0	0	0	0	0	0	0	0	0	0	0	3	0	0	1	0	0	0	0	0	0	0	d__Bacteria; p__Proteobacteria; c__Gammaproteobacteria; o__Xanthomonadales; f__Xanthomonadaceae; g__Pseudoxanthomonas
OTU_1482	0	6	0	1	1	0	1	3	5	4	0	1	0	0	1	0	0	0	6	0	0	0	0	0	2	0	0	0	0	0	0	0	0	0	1	0	0	0	0	0	0	0	0	0	0	d__Bacteria; p__Acidobacteria; c__Acidobacteriia; o__Solibacterales; f__Solibacteraceae_Subgroup_3; g__Bryobacter
OTU_1483	1	1	1	2	0	0	4	2	5	1	0	2	2	2	1	0	0	0	0	0	0	0	0	0	1	0	0	0	0	0	0	0	0	0	0	0	0	0	0	0	0	0	0	0	0	d__Bacteria; p__Proteobacteria; c__Gammaproteobacteria; o__Acidiferrobacterales; f__Acidiferrobacteraceae; g__Sulfurifustis; s__uncultured_bacterium
OTU_1484	0	2	0	2	1	1	0	0	2	0	0	0	0	0	0	0	0	0	0	0	0	0	0	0	0	0	0	0	0	0	0	0	0	0	0	0	0	0	0	0	0	0	0	0	0	d__Bacteria; p__Dependentiae; c__Babeliae; o__Babeliales; f__Vermiphilaceae; g__Vermiphilaceae_ge
OTU_1485	0	0	4	0	0	0	1	2	1	5	0	1	1	0	0	0	0	0	0	0	0	0	0	0	0	0	0	0	0	0	0	0	0	0	0	0	0	0	0	0	0	0	0	0	0	d__Bacteria; p__Chloroflexi; c__Anaerolineae; o__SBR1031; f__A4b; g__A4b_ge
OTU_1486	1	2	2	0	1	0	2	2	2	0	0	1	1	0	0	0	0	0	0	0	0	0	0	0	0	0	0	0	0	0	0	0	0	0	0	0	0	0	0	0	0	0	0	0	0	d__Bacteria; p__Bacteroidetes; c__Bacteroidia
OTU_1487	0	3	2	1	3	0	3	1	6	1	0	0	1	0	1	0	0	0	1	0	0	0	0	0	1	0	0	0	0	0	0	0	0	0	0	0	0	0	0	0	0	0	0	0	0	d__Bacteria; p__Actinobacteria; c__Acidimicrobiia; o__Microtrichales
OTU_1488	0	1	0	0	0	1	3	1	0	0	1	2	1	0	1	0	0	0	2	0	0	0	0	0	0	0	0	0	0	0	0	0	0	0	0	0	0	0	0	0	0	0	0	0	0	d__Bacteria; p__Proteobacteria; c__Deltaproteobacteria; o__Myxococcales; f__Haliangiaceae; g__Haliangium
OTU_1489	0	0	0	0	0	0	0	0	0	0	0	0	0	0	0	0	0	0	0	0	0	0	0	0	0	0	0	0	0	0	0	0	0	0	0	0	0	0	0	0	48	0	0	0	0	d__Bacteria; p__Chlamydiae; c__Chlamydiae; o__Chlamydiales; f__Parachlamydiaceae; g__Neochlamydia; s__metagenome
OTU_149	9	15	17	57	53	15	141	30	19	31	75	7	40	21	2	5	14	28	55	2	249	217	83	26	2	261	141	15	6	36	33	191	48	24	2	31	91	51	37	36	29	33	23	49	119	d__Bacteria; p__Proteobacteria; c__Alphaproteobacteria; o__Sphingomonadales; f__Sphingomonadaceae; g__Sphingomonas
OTU_1491	1	1	0	0	1	1	5	0	4	0	2	1	1	1	0	0	0	0	0	0	0	0	0	0	0	0	0	0	0	0	0	0	0	0	0	0	0	0	0	0	0	0	0	0	0	d__Bacteria; p__Actinobacteria; c__Actinobacteria; o__Streptosporangiales; f__Streptosporangiaceae; g__Planomonospora
OTU_1492	0	0	0	0	0	0	0	0	0	0	0	0	0	0	0	0	0	0	0	0	0	0	0	0	0	0	0	0	0	0	7	2	10	3	7	0	1	17	0	11	9	15	0	1	0	d__Bacteria; p__Planctomycetes; c__Planctomycetacia; o__Isosphaerales; f__Isosphaeraceae
OTU_1493	0	5	4	1	2	3	1	1	9	1	0	2	0	0	2	0	0	0	1	0	0	0	0	0	0	0	0	0	0	0	0	0	0	0	0	0	0	0	0	0	0	0	0	0	0	d__Bacteria; p__Armatimonadetes; c__Chthonomonadetes; o__Chthonomonadales; f__Chthonomonadales_fa; g__Chthonomonadales_ge; s__uncultured_bacterium
OTU_1494	0	0	0	0	0	0	0	0	0	0	0	0	0	0	0	0	0	0	0	0	1	0	0	0	0	0	0	0	0	0	68	67	15	12	31	29	9	11	20	44	77	21	4	4	8	d__Bacteria; p__Proteobacteria; c__Alphaproteobacteria; o__Sphingomonadales; f__Sphingomonadaceae; g__Sphingomonas
OTU_1495	3	6	2	5	4	6	4	11	8	5	4	2	2	2	2	0	0	0	19	0	0	2	0	0	2	2	2	0	0	0	1	0	0	0	2	0	0	0	0	1	5	0	0	0	0	d__Bacteria; p__Actinobacteria; c__Acidimicrobiia; o__Microtrichales; f__Ilumatobacteraceae; g__CL500_29_marine_group; s__metagenome
OTU_1496	0	0	0	0	0	0	0	0	0	0	0	0	0	0	0	10	5	3	0	0	5	0	0	0	0	13	2	0	0	6	0	4	4	0	0	0	7	9	0	2	3	0	0	3	4	d__Bacteria; p__Proteobacteria; c__Deltaproteobacteria; o__Oligoflexales; f__0319_6G20; g__0319_6G20_ge
OTU_1497	1	2	4	3	1	2	3	1	6	1	1	1	4	2	0	0	0	0	0	2	0	0	0	0	0	0	0	0	0	0	0	0	0	0	0	0	0	0	0	0	0	0	0	0	0	d__Bacteria; p__Chloroflexi; c__Anaerolineae; o__Anaerolineales; f__Anaerolineaceae; g__uncultured
OTU_1498	0	0	0	0	0	0	0	0	0	0	0	0	0	0	0	0	0	1	0	0	18	0	0	0	0	0	0	0	0	0	0	26	4	5	2	1	39	3	1	0	18	16	0	0	0	d__Bacteria; p__Proteobacteria; c__Deltaproteobacteria; o__Myxococcales; f__Polyangiaceae; g__Pajaroellobacter
OTU_1499	0	0	0	0	0	0	0	0	0	0	0	0	0	0	0	0	0	0	0	0	0	0	0	0	0	0	0	0	0	0	0	0	51	0	0	0	0	0	0	0	0	0	0	0	0	d__Bacteria
OTU_15	1913	5428	1083	469	1025	440	482	298	135	5294	1543	711	2634	1057	926	66	7	6	39	162	172	12	29	24	96	94	145	15	8	6	0	0	1	1	2	0	1	2	0	3	2	0	0	1	0	d__Bacteria; p__Actinobacteria; c__Actinobacteria; o__Micrococcales; f__Micrococcaceae; g__Arthrobacter; s__Arthrobacter_agilis
OTU_150	35	44	9	46	72	14	26	72	25	44	46	51	20	11	2	0	0	2	0	4	4	0	1	0	6	0	12	0	1	0	0	0	0	1	0	0	0	0	0	0	0	0	0	0	0	d__Bacteria; p__Proteobacteria; c__Alphaproteobacteria; o__Rhodobacterales; f__Rhodobacteraceae; g__Rubellimicrobium
OTU_1500	2	1	1	4	0	0	0	3	3	0	4	1	1	4	0	0	0	0	0	0	0	0	1	1	0	0	2	0	0	0	0	0	0	0	0	0	0	0	0	0	0	0	0	0	0	d__Bacteria; p__Bacteroidetes; c__Bacteroidia; o__Cytophagales; f__Hymenobacteraceae; g__Pontibacter; s__uncultured_bacterium
OTU_1501	0	0	0	0	0	6	0	0	0	2	0	1	0	0	0	0	0	0	0	0	0	0	0	0	0	0	0	0	0	0	0	0	0	0	0	0	0	0	0	0	0	0	0	0	0	Unclassified
OTU_1502	2	2	1	2	0	0	1	2	2	3	0	1	1	1	1	0	0	0	0	0	0	0	0	0	0	0	0	0	0	0	0	0	0	0	0	0	0	0	0	0	0	0	0	0	0	d__Bacteria; p__Gemmatimonadetes; c__Gemmatimonadetes; o__Gemmatimonadales; f__Gemmatimonadaceae; g__Gemmatimonas
OTU_1503	1	1	4	1	1	0	1	4	2	2	1	5	6	2	2	0	0	0	0	0	0	0	0	0	0	0	0	0	0	0	1	0	0	0	0	0	0	0	0	0	0	0	0	0	0	d__Bacteria; p__Acidobacteria; c__Thermoanaerobaculia; o__Thermoanaerobaculales; f__Thermoanaerobaculaceae; g__Subgroup_10
OTU_1504	0	1	0	2	0	1	0	2	0	2	1	0	0	0	0	0	0	1	0	0	0	0	0	0	0	0	0	0	0	0	0	0	0	0	0	0	0	0	0	0	0	0	0	0	0	d__Bacteria; p__Planctomycetes; c__Phycisphaerae; o__Tepidisphaerales; f__WD2101_soil_group; g__WD2101_soil_group_ge
OTU_1505	0	0	0	0	0	0	0	0	0	0	0	0	0	0	0	2	1	0	1	7	11	5	0	2	4	15	5	0	0	0	0	0	0	0	0	1	0	0	0	0	0	0	0	0	0	Unclassified
OTU_1506	0	0	0	0	0	0	0	1	0	0	0	0	0	0	0	0	0	0	0	0	0	0	0	0	0	0	0	0	0	0	15	11	50	0	0	1	5	2	5	1	6	7	0	0	1	d__Bacteria; p__Bacteroidetes; c__Bacteroidia; o__Chitinophagales; f__Chitinophagaceae
OTU_1507	0	0	0	0	0	0	0	0	0	0	0	0	0	0	0	0	0	0	0	0	0	0	0	0	0	0	0	0	0	0	11	12	2	5	1	5	11	5	12	8	1	9	6	7	25	d__Bacteria; p__Patescibacteria; c__Saccharimonadia; o__Saccharimonadales; f__Saccharimonadales_fa; g__Saccharimonadales_ge
OTU_151	14	10	0	4	5	4	9	1	0	36	24	1	83	181	103	9	74	54	17	141	178	16	4	605	26	7	29	11	0	0	0	1	1	3	3	0	3	3	0	1	3	13	0	0	1	Unclassified
OTU_1511	0	2	5	1	0	2	3	2	12	8	0	0	6	1	0	1	0	0	26	2	2	0	0	1	4	2	7	0	0	0	0	0	0	0	1	0	0	1	0	2	1	1	0	0	0	d__Bacteria; p__Acidobacteria; c__Subgroup_6; o__Subgroup_6_or; f__Subgroup_6_fa; g__Subgroup_6_ge; s__Acidobacteria_bacterium_LWH4
OTU_1512	0	0	0	0	0	0	0	0	0	0	0	0	0	0	0	0	0	1	0	0	0	0	0	0	0	0	0	0	0	0	7	24	12	0	0	1	1	0	16	0	2	2	3	14	35	d__Bacteria; p__Patescibacteria; c__Saccharimonadia; o__Saccharimonadales; f__Saccharimonadales_fa; g__Saccharimonadales_ge; s__bacterium_LWQ8
OTU_1513	0	0	0	0	0	0	0	0	0	1	0	4	0	0	0	0	0	0	0	3	0	0	11	0	0	0	0	0	0	0	0	1	0	3	5	0	4	0	0	0	14	0	0	7	3	Unclassified
OTU_1514	0	2	1	1	1	0	1	2	3	3	1	1	1	1	3	0	0	0	0	0	0	0	0	0	0	0	0	0	0	0	0	0	0	0	0	0	0	0	0	0	0	0	0	0	0	d__Bacteria; p__Proteobacteria; c__Deltaproteobacteria; o__Myxococcales; f__Blfdi19; g__Blfdi19_ge
OTU_1515	0	0	0	0	0	0	0	0	0	0	0	0	0	0	0	0	0	0	0	0	0	0	1	0	0	0	0	0	0	0	0	59	0	0	0	0	1	0	0	0	38	0	0	0	0	d__Bacteria; p__Bacteroidetes; c__Bacteroidia; o__Cytophagales; f__Hymenobacteraceae; g__Hymenobacter
OTU_1516	2	2	7	2	4	1	7	0	2	5	1	0	3	0	1	38	23	135	1	3	20	10	12	4	7	6	8	8	23	11	371	358	106	24	17	21	25	59	28	36	108	97	12	15	25	d__Bacteria; p__Actinobacteria; c__Actinobacteria; o__Micrococcales
OTU_1517	0	1	1	1	0	0	3	0	0	0	0	1	1	0	2	0	0	0	0	0	0	2	0	0	1	5	0	0	0	0	0	0	0	0	1	1	0	0	0	0	0	0	0	0	0	d__Bacteria; p__Proteobacteria; c__Gammaproteobacteria; o__Pseudomonadales; f__Moraxellaceae; g__Psychrobacter; s__Psychrobacter_faecalis
OTU_1518	0	3	0	1	2	0	0	3	1	1	0	3	1	0	0	0	0	0	1	0	0	0	0	0	0	0	0	0	1	0	0	0	0	0	0	0	0	0	0	0	1	0	0	0	0	d__Bacteria; p__Bacteroidetes; c__Bacteroidia; o__Cytophagales; f__Hymenobacteraceae; g__Adhaeribacter
OTU_1520	0	3	3	1	4	1	2	3	3	0	0	0	0	0	0	0	0	0	0	0	0	0	0	0	0	0	0	0	0	0	0	0	0	0	0	0	0	0	0	0	0	0	0	0	0	d__Bacteria; p__Bacteroidetes; c__Bacteroidia; o__Bacteroidales; f__Bacteroidaceae; g__Bacteroides; s__Bacteroides_thetaiotaomicron
OTU_1521	0	0	0	0	0	0	0	0	0	0	0	0	0	0	0	0	0	0	0	0	0	2	3	0	0	0	0	2	0	0	1	4	0	0	2	1	8	9	3	5	35	1	32	40	6	d__Bacteria; p__Bacteroidetes; c__Bacteroidia; o__Cytophagales; f__Spirosomaceae; g__Spirosoma
OTU_1522	20	43	37	34	81	250	216	31	29	421	147	172	73	33	23	95	30	6	105	16	80	103	22	60	13	21	16	39	16	20	4	1	0	1	6	3	0	4	1	0	0	1	5	2	6	d__Bacteria; p__Proteobacteria; c__Gammaproteobacteria; o__Betaproteobacteriales; f__Burkholderiaceae; g__Massilia
OTU_1523	0	0	0	0	0	0	0	0	0	0	0	0	0	0	0	0	0	0	0	0	0	0	0	0	0	0	0	0	0	0	0	0	0	2	25	0	0	8	0	0	0	1	0	0	0	d__Bacteria
OTU_1524	0	0	0	0	0	0	0	0	0	6	1	0	1	1	0	0	0	0	0	0	0	0	0	0	0	0	0	0	0	0	0	0	0	0	0	0	0	0	0	0	0	0	0	0	0	d__Bacteria; p__Proteobacteria; c__Gammaproteobacteria
OTU_1525	0	0	0	0	0	0	0	0	0	0	0	0	0	0	0	0	0	0	0	0	0	0	0	0	0	0	0	0	0	0	1	23	4	2	3	0	2	5	0	0	16	0	1	1	0	Unclassified
OTU_1526	1	0	0	0	4	0	1	0	0	9	2	3	0	0	0	0	0	0	0	0	0	0	0	0	0	0	0	0	0	0	0	0	0	0	0	0	0	0	0	0	0	0	0	0	0	d__Bacteria; p__Bacteroidetes; c__Bacteroidia; o__Cytophagales; f__Hymenobacteraceae; g__Hymenobacter
OTU_1527	1	2	0	1	1	2	12	2	4	3	2	2	2	0	1	2	0	0	20	2	3	2	0	1	5	0	2	0	0	0	1	0	0	0	7	0	0	0	0	0	0	0	1	0	0	d__Bacteria; p__Proteobacteria; c__Alphaproteobacteria; o__Rhizobiales; f__Hyphomicrobiaceae; g__Pedomicrobium; s__uncultured_Pedomicrobium_sp.
OTU_1528	0	0	0	0	6	3	0	0	2	2	1	0	0	0	0	0	0	1	0	1	0	0	0	0	0	1	0	0	0	0	0	0	0	0	0	0	0	0	0	0	0	0	0	0	0	d__Bacteria; p__Acidobacteria; c__Blastocatellia_Subgroup_4; o__Blastocatellales; f__Blastocatellaceae; g__Blastocatella; s__uncultured_bacterium
OTU_1529	1	1	0	0	1	1	0	2	1	2	0	1	2	0	1	0	0	0	0	1	0	0	0	0	0	0	0	0	1	0	0	0	0	0	0	0	0	0	0	0	0	0	0	0	0	d__Bacteria; p__Actinobacteria; c__Thermoleophilia; o__Solirubrobacterales; f__Solirubrobacteraceae; g__Conexibacter; s__metagenome
OTU_153	0	0	4	0	0	0	4	0	0	1	1	0	1	0	0	8	5	21	5	3	20	1441	1635	280	31	81	83	311	173	44	2	0	0	0	0	0	0	1	0	1	0	0	1	1	7	d__Bacteria; p__Bacteroidetes; c__Bacteroidia; o__Cytophagales; f__Hymenobacteraceae; g__Hymenobacter
OTU_1531	10	11	10	3	4	4	23	25	44	24	11	11	14	3	5	0	1	0	7	0	0	0	0	0	0	0	2	0	0	0	0	0	0	0	0	0	0	0	0	0	0	0	0	0	0	d__Bacteria; p__Proteobacteria; c__Alphaproteobacteria; o__Rhizobiales; f__Devosiaceae; g__uncultured; s__uncultured_bacterium
OTU_1533	1	1	0	0	1	0	0	2	1	0	2	0	1	2	0	0	0	0	0	0	0	0	0	0	0	0	0	0	0	0	0	0	0	0	0	0	0	1	0	0	0	0	0	0	0	d__Bacteria; p__Proteobacteria; c__Alphaproteobacteria; o__Elsterales; f__uncultured; g__uncultured_ge; s__uncultured_bacterium
OTU_1534	3	3	4	0	1	3	4	9	7	6	1	0	3	1	0	0	0	0	10	2	0	2	0	0	2	2	0	0	0	0	0	0	0	0	0	0	0	0	0	0	1	0	0	0	0	d__Bacteria; p__Actinobacteria; c__Thermoleophilia; o__Solirubrobacterales; f__67_14; g__67_14_ge
OTU_1535	2	1	3	0	2	1	1	2	7	0	2	2	0	0	0	0	0	0	0	0	0	0	0	0	0	0	0	0	0	0	0	0	0	0	0	0	0	0	0	0	0	0	0	0	0	d__Bacteria; p__Gemmatimonadetes; c__Longimicrobia; o__Longimicrobiales; f__Longimicrobiaceae; g__Longimicrobiaceae_ge; s__uncultured_bacterium
OTU_1536	6	2	7	1	0	2	5	2	8	5	3	1	1	0	2	0	0	0	1	0	0	0	0	0	0	0	0	0	0	0	0	0	0	0	0	0	0	0	0	0	0	0	0	0	0	d__Bacteria; p__Actinobacteria; c__Acidimicrobiia; o__uncultured; f__uncultured_fa; g__uncultured_ge; s__uncultured_actinobacterium
OTU_1537	0	0	0	0	0	0	0	0	0	0	0	0	0	0	0	0	0	0	0	0	0	0	0	0	0	0	0	0	0	0	18	5	5	0	0	4	9	6	12	0	1	6	1	0	6	d__Bacteria; p__Verrucomicrobia; c__Verrucomicrobiae
OTU_1538	0	0	0	0	0	0	0	0	0	0	0	0	0	0	0	0	0	0	0	0	0	0	0	0	0	0	0	0	0	0	0	8	0	1	0	0	13	14	2	1	0	0	10	2	12	d__Bacteria; p__Bacteroidetes; c__Bacteroidia; o__Cytophagales; f__Microscillaceae; g__uncultured
OTU_1540	4	2	1	2	0	0	1	2	7	2	0	1	0	1	0	0	0	0	0	0	0	0	0	0	0	0	0	0	0	0	0	0	0	0	0	0	0	0	0	0	0	0	0	0	0	d__Bacteria; p__Gemmatimonadetes; c__Gemmatimonadetes; o__Gemmatimonadales; f__Gemmatimonadaceae; g__Gemmatimonas
OTU_1541	2	5	0	0	1	2	7	2	6	0	1	1	1	1	1	0	0	0	0	1	0	0	0	0	0	0	1	0	0	0	0	0	0	0	0	0	0	0	0	0	0	0	0	0	0	d__Bacteria; p__Planctomycetes; c__Planctomycetacia; o__Pirellulales; f__Pirellulaceae; g__uncultured
OTU_1542	0	2	5	1	2	1	5	1	5	2	2	4	7	0	3	0	0	0	2	0	0	0	0	0	0	0	2	0	0	0	0	0	0	0	0	0	0	0	0	0	1	0	0	0	0	d__Bacteria; p__Proteobacteria; c__Gammaproteobacteria; o__Betaproteobacteriales; f__A21b; g__A21b_ge; s__uncultured_bacterium
OTU_1543	0	1	1	0	0	2	0	0	0	0	0	0	0	1	10	1	0	0	0	0	0	1	0	0	0	0	0	0	0	0	0	0	0	0	0	3	0	1	0	0	0	0	0	0	0	d__Bacteria; p__Proteobacteria; c__Gammaproteobacteria; o__Pseudomonadales; f__Moraxellaceae; g__Enhydrobacter
OTU_1545	0	0	0	0	0	0	0	0	0	0	0	0	2	2	0	11	10	1	31	51	2	9	10	34	13	12	7	2	0	2	0	0	0	0	0	0	9	0	0	0	0	0	0	0	0	Unclassified
OTU_1546	0	0	3	0	1	2	1	0	1	1	1	0	0	0	0	0	0	0	0	0	0	0	0	0	0	0	0	0	0	0	0	0	0	0	0	0	0	0	0	0	0	0	0	0	0	d__Bacteria; p__Chloroflexi; c__Anaerolineae; o__SBR1031; f__A4b; g__A4b_ge; s__uncultured_bacterium
OTU_1547	0	0	0	0	0	0	0	0	0	0	0	0	0	0	0	0	0	0	0	0	0	0	0	0	0	0	0	0	0	0	5	8	22	5	2	0	8	7	1	0	6	7	0	0	0	d__Bacteria; p__Planctomycetes; c__Planctomycetacia; o__Isosphaerales; f__Isosphaeraceae; g__Singulisphaera
OTU_1548	0	0	0	5	4	0	1	1	0	1	0	0	0	1	1	0	0	0	0	1	4	0	0	0	0	0	0	0	0	0	0	0	0	0	0	0	0	0	0	0	0	1	0	0	0	d__Bacteria; p__Proteobacteria; c__Deltaproteobacteria; o__Myxococcales; f__Phaselicystidaceae; g__Phaselicystis; s__uncultured_bacterium
OTU_1549	0	0	0	2	2	3	3	1	0	4	2	1	3	0	2	0	0	0	0	4	4	3	0	0	2	2	0	4	1	1	0	1	4	1	0	18	0	3	0	1	0	0	0	0	0	d__Bacteria; p__Proteobacteria; c__Gammaproteobacteria; o__Betaproteobacteriales; f__Burkholderiaceae; g__Pigmentiphaga
OTU_155	0	0	0	0	0	0	0	0	0	0	0	0	0	0	0	5	0	9	1	0	0	0	0	0	0	0	2	0	0	0	323	285	629	1385	387	213	463	843	101	304	1065	731	40	7	44	d__Bacteria; p__Acidobacteria; c__Acidobacteriia; o__Acidobacteriales; f__Acidobacteriaceae_Subgroup_1; g__Terriglobus; s__uncultured_bacterium
OTU_1551	0	0	0	0	0	0	0	1	2	0	1	1	0	0	1	0	0	0	0	0	0	1	0	0	0	0	0	0	0	0	0	0	0	0	0	0	0	0	0	0	0	0	0	0	0	d__Bacteria; p__Chloroflexi
OTU_1552	4	1	3	1	2	0	1	0	4	2	2	4	2	0	0	0	0	0	0	0	0	0	0	0	0	0	0	0	0	0	0	0	0	0	0	0	0	0	0	0	0	0	0	0	0	d__Bacteria; p__Gemmatimonadetes; c__Gemmatimonadetes; o__Gemmatimonadales; f__Gemmatimonadaceae; g__uncultured; s__uncultured_Gemmatimonadetes_bacterium
OTU_1553	0	0	0	0	1	0	0	3	2	3	2	1	0	0	0	0	0	0	0	0	0	0	0	0	0	0	0	0	0	0	0	0	0	0	0	0	0	0	0	0	0	0	0	0	0	d__Bacteria; p__FBP; c__FBP_cl; o__FBP_or; f__FBP_fa; g__FBP_ge; s__uncultured_bacterium
OTU_1555	2	2	7	3	3	2	6	12	7	3	1	4	3	3	1	1	0	0	2	0	0	0	0	0	1	3	0	0	1	0	0	0	0	0	0	0	0	0	0	0	0	0	0	0	0	d__Bacteria; p__Proteobacteria; c__Alphaproteobacteria; o__Rhizobiales; f__Beijerinckiaceae; g__Psychroglaciecola; s__uncultured_bacterium
OTU_1556	0	0	0	0	0	0	0	0	0	0	0	0	0	0	0	0	0	0	0	0	2	0	0	0	0	0	0	0	0	0	1	36	14	0	0	1	12	6	2	3	4	1	18	7	6	d__Bacteria
OTU_1557	0	0	0	0	0	0	0	0	0	0	0	0	0	0	0	0	0	0	0	0	0	0	0	0	0	0	0	0	0	0	2	2	1	10	17	5	3	0	0	23	9	12	0	0	2	Unclassified
OTU_1558	2	0	1	0	5	1	2	0	7	3	2	1	2	2	1	0	0	0	0	0	0	0	0	0	0	0	0	0	0	0	0	0	0	0	0	0	0	0	0	0	0	0	0	0	0	d__Bacteria; p__Proteobacteria; c__Deltaproteobacteria; o__Myxococcales; f__Polyangiaceae; g__Pajaroellobacter
OTU_1559	2	4	3	1	0	1	2	1	0	3	0	0	1	1	0	0	1	0	0	2	1	0	1	0	3	0	1	0	0	0	0	0	0	0	1	0	0	0	0	0	0	0	0	1	0	d__Bacteria; p__Actinobacteria; c__Actinobacteria; o__Corynebacteriales; f__Dietziaceae; g__Dietzia; s__Dietzia_maris
OTU_156	0	0	0	0	0	0	0	0	0	0	0	0	0	0	0	1	0	0	0	0	0	2	0	0	0	0	0	0	0	0	1598	749	775	320	218	112	210	169	190	795	848	575	88	33	89	d__Bacteria; p__Proteobacteria; c__Alphaproteobacteria; o__Rhizobiales; f__Beijerinckiaceae
OTU_1560	2	1	1	0	0	0	0	1	1	0	0	2	2	0	0	0	0	0	0	0	0	0	0	0	0	0	0	0	0	0	0	0	0	0	0	0	0	0	0	0	0	0	0	0	0	d__Bacteria; p__Proteobacteria; c__Deltaproteobacteria; o__Myxococcales
OTU_1561	1	0	1	0	0	0	0	0	0	3	0	0	1	0	0	0	0	0	0	0	0	0	0	0	0	0	0	0	0	0	0	0	0	0	0	0	0	0	0	0	0	0	1	0	0	d__Bacteria; p__Proteobacteria; c__Alphaproteobacteria
OTU_1562	0	1	2	1	0	0	3	3	2	5	1	4	3	0	2	0	0	0	41	7	1	0	1	0	6	3	7	0	2	1	1	0	0	0	0	0	0	0	0	0	1	0	0	0	0	d__Bacteria; p__Proteobacteria; c__Alphaproteobacteria; o__Rhizobiales; f__Rhizobiaceae
OTU_1563	2	0	8	0	1	0	0	0	0	0	0	0	0	0	1	0	0	0	0	0	0	0	0	0	0	15	0	0	0	0	0	0	0	0	0	0	0	0	0	0	0	0	0	0	0	Unclassified
OTU_1564	0	0	0	0	0	0	0	0	0	0	0	0	0	0	0	0	0	9	0	0	0	0	0	0	0	0	0	0	0	0	17	58	25	0	2	1	7	3	21	9	69	19	30	2	12	d__Bacteria; p__Armatimonadetes; c__Armatimonadia; o__Armatimonadales; f__Armatimonadales_fa; g__Armatimonadales_ge; s__uncultured_bacterium
OTU_1565	5	3	2	1	1	1	3	2	5	3	0	2	3	3	2	0	0	0	1	0	0	0	0	0	0	0	0	0	0	0	0	0	0	0	0	0	0	0	0	0	0	0	0	0	0	d__Bacteria; p__Bacteroidetes; c__Bacteroidia; o__Cytophagales; f__Microscillaceae; g__uncultured; s__uncultured_soil_bacterium
OTU_1566	8	33	22	11	23	55	52	8	12	35	33	0	36	37	26	53	22	34	81	28	42	53	6	90	15	4	7	48	6	39	14	0	0	4	2	25	0	1	0	1	1	2	1	7	7	d__Bacteria; p__Proteobacteria; c__Alphaproteobacteria; o__Sphingomonadales; f__Sphingomonadaceae; g__Sphingomonas; s__Sphingomonas_faeni
OTU_1567	0	3	0	0	1	0	0	2	7	3	0	0	1	0	0	0	0	0	0	0	0	0	0	0	0	0	0	0	0	0	0	0	0	0	0	0	0	0	0	0	0	0	0	0	0	d__Bacteria; p__Planctomycetes; c__Phycisphaerae; o__Tepidisphaerales; f__WD2101_soil_group; g__WD2101_soil_group_ge
OTU_1568	1	2	0	0	0	0	0	0	0	0	0	0	0	0	0	0	0	5	0	1	10	2	0	0	1	1	0	0	1	0	1	3	0	0	35	0	1	0	0	0	0	0	0	0	0	d__Bacteria; p__Proteobacteria; c__Alphaproteobacteria; o__Rhodobacterales; f__Rhodobacteraceae; g__Amaricoccus; s__Amaricoccus_tamworthensis
OTU_1569	0	0	1	4	4	1	15	15	11	6	4	2	9	3	3	0	0	0	33	4	1	1	3	1	9	3	6	0	0	2	0	1	1	0	0	0	0	0	0	0	0	1	0	0	0	d__Bacteria; p__Proteobacteria; c__Alphaproteobacteria; o__Rhizobiales; f__Xanthobacteraceae
OTU_157	74	24	5	37	46	26	10	73	5	160	86	92	26	10	5	0	0	0	0	0	0	0	0	0	0	0	0	0	0	0	0	0	0	0	0	0	0	0	0	0	0	0	0	0	0	d__Bacteria; p__Bacteroidetes; c__Bacteroidia; o__Cytophagales
OTU_1570	2	2	3	1	1	2	7	2	14	0	0	1	0	1	0	0	0	0	0	0	0	0	0	0	0	0	0	0	0	0	0	0	0	0	0	0	0	0	0	0	0	0	0	0	0	d__Bacteria; p__Firmicutes; c__Clostridia; o__Clostridiales; f__Lachnospiraceae; g__Anaerostipes; s__metagenome
OTU_1571	1	2	0	1	1	0	1	1	4	2	3	3	2	0	1	0	1	0	2	0	0	0	0	0	3	1	1	0	1	0	0	0	0	0	0	0	0	0	0	0	0	0	0	0	0	d__Bacteria; p__Actinobacteria; c__Thermoleophilia; o__Solirubrobacterales; f__67_14; g__67_14_ge
OTU_1573	0	0	0	0	0	0	3	1	10	0	1	1	1	0	2	0	0	0	0	0	0	0	0	0	0	0	0	0	0	0	0	0	0	0	0	0	0	0	0	0	0	0	0	0	0	d__Bacteria; p__Chloroflexi; c__Anaerolineae; o__SBR1031; f__SBR1031_fa; g__SBR1031_ge; s__uncultured_soil_bacterium
OTU_1574	1	1	1	0	0	0	3	0	3	0	1	0	1	0	0	0	0	0	0	0	0	0	0	0	0	0	0	0	0	0	0	0	0	0	0	0	0	0	0	0	0	0	0	0	0	d__Bacteria; p__Gemmatimonadetes; c__Gemmatimonadetes; o__Gemmatimonadales; f__Gemmatimonadaceae
OTU_1575	1	0	1	1	0	1	4	1	1	4	2	1	1	0	0	0	0	0	1	1	0	0	0	0	0	0	0	0	0	0	0	0	0	0	0	0	0	0	0	0	0	0	0	0	0	d__Bacteria; p__Verrucomicrobia; c__Verrucomicrobiae; o__Pedosphaerales; f__Pedosphaeraceae; g__Pedosphaeraceae_ge
OTU_1576	3	0	0	0	0	0	0	1	1	0	0	0	0	2	0	0	0	0	0	0	0	0	0	0	0	0	0	0	0	0	0	0	0	0	0	0	0	0	0	0	0	0	0	0	0	d__Bacteria; p__Proteobacteria; c__Gammaproteobacteria; o__Cellvibrionales; f__Cellvibrionaceae; g__Cellvibrio
OTU_1577	3	0	2	4	0	1	2	6	2	4	0	5	1	0	0	0	0	0	2	0	0	0	0	0	3	1	1	0	0	0	0	1	0	0	0	0	0	0	0	0	0	0	0	0	0	d__Bacteria; p__Actinobacteria; c__Actinobacteria; o__Propionibacteriales; f__Nocardioidaceae
OTU_1578	10	10	4	26	18	5	7	10	15	3	5	6	5	7	4	0	1	4	18	2	1	1	0	0	1	1	0	0	3	0	1	0	0	1	0	0	13	1	2	0	0	0	2	1	1	d__Bacteria; p__Proteobacteria; c__Deltaproteobacteria; o__Myxococcales
OTU_1579	0	0	0	4	8	0	0	2	4	1	6	3	3	1	0	0	0	0	0	0	0	0	0	0	1	0	0	0	0	0	0	0	0	0	0	0	2	1	1	0	1	0	0	0	0	d__Bacteria; p__Actinobacteria; c__Acidimicrobiia
OTU_1580	2	1	2	0	1	3	1	5	2	3	1	1	4	0	0	0	0	0	4	0	0	0	0	0	0	1	1	0	0	0	0	0	0	0	0	0	0	0	0	0	0	0	0	0	0	d__Bacteria; p__Proteobacteria; c__Alphaproteobacteria; o__Rhizobiales; f__KF_JG30_B3; g__KF_JG30_B3_ge; s__uncultured_bacterium
OTU_1581	0	0	0	0	0	0	0	0	0	0	0	0	0	0	0	0	0	0	2	28	1	0	2	16	0	3	0	0	0	0	0	0	2	0	0	0	0	0	0	0	0	0	0	0	0	Unclassified
OTU_1582	5	5	2	1	2	1	5	2	1	3	5	1	5	0	0	0	0	0	1	0	0	0	0	0	0	0	1	0	0	0	1	0	0	0	0	0	0	0	0	0	0	0	0	0	0	d__Bacteria; p__Proteobacteria; c__Alphaproteobacteria; o__Rhizobiales; f__Beijerinckiaceae
OTU_1583	0	4	1	0	0	0	1	5	3	1	1	0	0	1	1	0	0	0	2	0	3	1	0	0	0	0	0	0	0	0	0	0	0	0	0	0	0	0	0	0	0	0	0	0	0	d__Bacteria; p__Planctomycetes; c__Planctomycetacia; o__Planctomycetales; f__uncultured; g__uncultured_ge; s__uncultured_bacterium
OTU_1585	0	1	1	0	0	0	0	2	1	0	0	0	0	0	2	0	0	0	0	1	0	0	0	0	0	0	0	0	0	0	0	0	0	0	0	0	0	0	0	1	0	0	0	0	0	d__Bacteria; p__Chloroflexi; c__Chloroflexia; o__Thermomicrobiales; f__JG30_KF_CM45; g__JG30_KF_CM45_ge
OTU_1586	1	2	0	0	2	1	3	0	2	2	1	0	0	0	0	0	0	0	4	0	1	0	1	1	1	0	0	0	0	0	0	0	0	0	0	0	0	0	0	2	0	0	0	0	0	d__Bacteria; p__Proteobacteria; c__Alphaproteobacteria; o__uncultured; f__uncultured_fa; g__uncultured_ge; s__uncultured_Stella_sp.
OTU_1587	3	0	1	2	1	0	1	0	0	3	2	0	5	0	0	0	0	0	0	0	1	0	0	0	0	0	1	0	0	0	1	2	3	1	0	1	0	0	1	0	4	1	1	0	1	d__Bacteria; p__Armatimonadetes; c__Fimbriimonadia; o__Fimbriimonadales; f__Fimbriimonadaceae; g__Fimbriimonadaceae_ge
OTU_1588	0	1	0	0	0	0	0	3	2	2	0	0	3	1	0	0	0	0	0	0	0	0	0	0	0	0	0	0	0	0	0	0	0	0	0	0	0	0	0	0	0	0	0	0	0	d__Bacteria; p__Gemmatimonadetes; c__Longimicrobia; o__Longimicrobiales; f__Longimicrobiaceae; g__Longimicrobiaceae_ge
OTU_1589	13	22	4	5	20	8	5	7	2	23	15	11	5	9	4	0	0	0	0	0	1	0	0	0	0	0	0	0	0	0	36	34	22	1	0	0	15	2	11	3	40	12	1	1	1	d__Bacteria; p__Actinobacteria; c__Actinobacteria; o__Frankiales
OTU_159	108	119	23	74	171	48	23	38	17	75	110	79	10	17	10	86	4	175	4	3	237	136	245	28	7	19	84	80	275	313	242	141	78	30	1	2	33	15	31	23	58	56	58	83	36	d__Bacteria; p__Actinobacteria; c__Actinobacteria; o__Frankiales
OTU_1590	23	13	10	27	31	29	26	9	9	56	14	4	35	6	5	3	18	46	14	6	37	35	27	12	1	4	16	16	25	40	346	349	167	135	29	56	62	60	41	620	187	381	49	98	58	d__Bacteria; p__Proteobacteria; c__Alphaproteobacteria; o__Sphingomonadales; f__Sphingomonadaceae
OTU_1591	1	1	0	3	0	0	1	3	2	2	2	0	2	1	1	0	0	0	2	0	0	0	0	0	1	0	0	0	0	0	0	0	0	0	0	0	0	0	0	0	0	0	0	0	0	d__Bacteria; p__Proteobacteria; c__Deltaproteobacteria; o__Myxococcales; f__Nannocystaceae; g__Nannocystis; s__metagenome
OTU_1592	0	0	1	1	0	1	1	0	2	2	0	1	2	0	0	0	0	0	0	0	0	0	0	0	0	0	0	0	0	0	0	0	0	0	0	0	0	0	0	0	0	0	0	0	0	d__Bacteria; p__Gemmatimonadetes; c__Gemmatimonadetes; o__Gemmatimonadales; f__Gemmatimonadaceae
OTU_1593	0	1	0	0	0	0	0	0	0	5	0	0	0	0	0	0	0	0	0	0	0	0	0	0	0	0	0	0	0	0	0	0	0	0	0	0	0	0	0	0	0	0	0	0	0	Unclassified
OTU_1594	0	0	0	0	0	0	0	0	0	0	0	0	0	0	0	0	0	0	0	0	0	0	0	0	0	0	0	0	0	0	0	0	1	0	0	22	3	6	24	0	8	0	0	29	5	d__Bacteria; p__Bacteroidetes; c__Bacteroidia; o__Cytophagales; f__Spirosomaceae; g__Spirosoma
OTU_1596	0	21	0	0	1	0	0	0	0	1	0	1	0	0	1	0	0	0	0	0	0	0	0	0	0	0	0	0	0	0	0	0	0	0	0	0	0	0	0	0	0	0	0	0	0	d__Bacteria; p__Proteobacteria; c__Gammaproteobacteria; o__Enterobacteriales; f__Enterobacteriaceae; g__Candidatus_Regiella; s__Candidatus_Regiella_insecticola
OTU_1597	1	0	0	1	0	1	1	0	1	0	0	1	0	0	2	0	0	0	1	0	0	0	0	0	0	0	0	0	0	0	0	0	0	0	0	0	0	0	0	0	0	0	0	0	0	d__Bacteria; p__Gemmatimonadetes; c__Gemmatimonadetes; o__Gemmatimonadales; f__Gemmatimonadaceae; g__uncultured; s__metagenome
OTU_1598	0	2	6	1	3	3	8	5	8	2	2	0	2	2	1	1	0	0	0	0	0	0	0	0	0	0	0	0	0	0	0	0	0	0	0	0	0	0	0	0	0	0	0	0	0	d__Bacteria; p__Verrucomicrobia; c__Verrucomicrobiae; o__Pedosphaerales; f__Pedosphaeraceae
OTU_16	190	341	869	746	2002	1186	4572	269	403	2112	1211	89	417	316	106	161	90	94	1336	1457	555	674	475	90	1022	959	2163	89	7	94	2	0	0	22	1	51	11	2	0	14	10	8	4	89	42	d__Bacteria; p__Proteobacteria; c__Alphaproteobacteria; o__Sphingomonadales; f__Sphingomonadaceae
OTU_160	111	124	64	119	106	44	105	182	122	142	142	100	83	66	58	3	3	39	106	9	39	25	13	12	55	23	39	11	17	13	1	0	1	19	16	0	5	2	2	1	2	3	4	11	3	d__Bacteria; p__Proteobacteria; c__Alphaproteobacteria; o__Rhizobiales; f__Beijerinckiaceae; g__Microvirga
OTU_1600	0	0	0	0	0	0	0	0	0	0	0	0	0	0	0	0	0	0	0	0	0	0	0	0	0	0	0	0	0	0	2	0	3	0	1	2	4	9	4	2	11	1	1	6	7	d__Bacteria
OTU_1601	0	0	0	4	0	0	0	4	0	0	0	2	0	0	0	0	0	0	0	0	0	0	0	0	0	0	0	0	0	0	0	0	0	0	0	0	0	0	0	0	0	0	0	0	0	Unclassified
OTU_1602	0	0	0	0	0	0	0	0	0	0	0	0	0	0	0	0	0	0	0	0	0	0	0	0	0	0	0	0	0	0	3	16	4	5	2	12	6	5	0	1	15	16	2	0	0	d__Bacteria; p__Proteobacteria; c__Alphaproteobacteria; o__Sphingomonadales; f__Sphingomonadaceae; g__Sphingomonas
OTU_1603	1	0	2	1	1	2	0	1	3	1	0	1	3	1	1	0	0	0	9	0	0	0	0	0	0	0	1	0	0	0	0	0	0	0	0	0	0	0	0	0	0	0	0	0	0	d__Bacteria; p__Planctomycetes; c__Planctomycetacia; o__Pirellulales; f__Pirellulaceae; g__uncultured
OTU_1605	0	0	1	0	0	0	3	0	3	3	0	0	0	0	0	0	0	0	0	0	0	0	0	1	2	0	6	0	0	0	0	0	0	0	0	0	0	0	0	0	0	0	0	0	0	d__Bacteria; p__Chloroflexi; c__Anaerolineae; o__SBR1031; f__A4b; g__A4b_ge; s__uncultured_bacterium
OTU_1606	1	0	0	0	0	1	0	0	0	6	2	2	0	0	0	0	0	0	0	0	0	0	0	0	0	0	0	0	0	0	0	0	0	0	0	0	0	0	0	0	0	0	0	0	0	d__Bacteria; p__Chlamydiae; c__Chlamydiae; o__Chlamydiales
OTU_1607	2	4	6	2	8	4	11	4	13	3	7	3	2	1	2	0	0	0	0	0	0	0	0	0	0	0	0	0	0	0	0	0	0	0	0	0	0	0	0	0	0	0	0	0	0	d__Bacteria; p__Proteobacteria; c__Gammaproteobacteria; o__Betaproteobacteriales; f__Nitrosomonadaceae; g__MND1
OTU_1608	2	0	1	1	4	0	0	4	7	2	4	0	0	1	1	0	0	0	8	1	0	0	0	0	0	3	1	0	0	0	0	0	0	2	1	0	0	0	0	2	0	0	0	0	0	d__Bacteria; p__Actinobacteria; c__Thermoleophilia; o__Solirubrobacterales
OTU_1609	0	0	0	0	0	0	0	0	0	0	0	0	0	0	0	0	0	3	0	0	0	0	0	0	0	0	0	0	0	0	6	2	3	0	0	0	7	1	5	0	39	9	1	0	0	d__Bacteria; p__Verrucomicrobia; c__Verrucomicrobiae; o__Chthoniobacterales
OTU_161	0	1	0	0	0	0	0	0	0	0	1	0	0	0	0	502	249	81	100	185	210	367	453	172	164	189	128	98	74	93	55	147	70	66	46	79	111	75	21	128	318	184	128	189	224	d__Bacteria; p__Proteobacteria; c__Alphaproteobacteria; o__Acetobacterales; f__Acetobacteraceae
OTU_1610	0	13	0	0	0	0	0	0	0	0	1	0	0	0	0	0	0	0	0	0	0	0	0	0	0	0	0	0	0	1	0	0	0	0	1	0	0	0	0	0	0	0	0	0	0	d__Bacteria; p__Firmicutes; c__Bacilli; o__Bacillales
OTU_1611	2	0	5	0	0	0	0	0	0	1	1	0	0	1	0	0	0	0	1	2	0	0	0	0	0	0	1	0	0	0	0	0	0	0	0	0	0	0	0	0	0	0	0	0	0	d__Bacteria; p__Actinobacteria; c__Actinobacteria; o__Corynebacteriales; f__Corynebacteriaceae; g__Corynebacterium_1; s__Corynebacterium_marinum_DSM_44953
OTU_1612	1	1	1	0	1	1	1	3	3	2	0	0	0	1	0	0	0	0	0	0	0	0	0	0	0	0	0	0	0	0	0	0	0	0	0	0	0	0	0	0	0	0	0	0	0	d__Bacteria; p__Actinobacteria
OTU_1613	4	9	1	3	6	0	13	5	9	5	1	6	2	2	7	0	0	0	8	4	1	4	0	0	0	2	0	0	0	0	0	1	0	1	1	0	0	0	0	0	0	0	0	0	0	d__Bacteria; p__Actinobacteria; c__Actinobacteria; o__Streptomycetales; f__Streptomycetaceae; g__Streptomyces
OTU_1614	0	0	0	0	0	0	0	0	0	0	0	0	0	0	0	0	0	0	0	0	0	0	0	0	0	0	0	0	0	0	0	2	36	2	0	26	0	0	0	0	8	1	0	1	0	d__Bacteria; p__Bacteroidetes; c__Bacteroidia; o__Chitinophagales; f__Chitinophagaceae
OTU_1615	2	2	0	2	2	0	1	1	0	1	3	1	2	1	0	0	0	0	0	0	0	0	0	0	0	0	0	0	0	0	0	0	0	0	0	0	0	0	0	0	0	0	0	0	0	d__Bacteria; p__Proteobacteria; c__Alphaproteobacteria; o__Acetobacterales; f__Acetobacteraceae
OTU_1616	0	0	0	0	0	0	0	0	0	0	0	0	0	0	0	0	1	0	0	16	0	0	0	10	0	1	1	0	0	0	0	0	0	0	0	0	0	0	0	0	0	0	0	0	0	Unclassified
OTU_1617	0	4	1	1	0	1	4	1	6	1	1	3	0	1	0	0	0	0	1	1	0	0	0	0	0	0	0	0	0	0	0	0	0	0	0	0	0	0	0	0	0	0	0	0	0	d__Bacteria; p__Actinobacteria; c__Acidimicrobiia; o__Microtrichales
OTU_1618	0	0	0	0	0	0	7	0	0	0	0	0	0	0	0	0	0	0	1	0	0	1	0	1	0	0	0	0	0	0	0	0	0	0	0	0	0	0	0	0	0	0	0	0	1	Unclassified
OTU_1619	1	0	1	0	0	0	0	0	0	0	0	0	0	0	0	0	0	0	0	0	0	0	0	0	0	0	0	0	0	0	0	0	0	1	0	0	3	0	1	0	2	0	10	44	32	d__Bacteria; p__WPS_2; c__WPS_2_cl; o__WPS_2_or; f__WPS_2_fa; g__WPS_2_ge; s__metagenome
OTU_162	37	55	86	21	34	42	49	11	13	79	29	5	58	68	27	38	20	60	6	35	95	18	37	15	32	19	38	162	42	77	0	0	1	2	0	1	1	0	0	1	2	5	11	76	12	d__Bacteria; p__Actinobacteria; c__Actinobacteria; o__Kineosporiales; f__Kineosporiaceae; g__Kineosporia
OTU_1620	0	0	0	0	0	0	0	0	0	0	0	0	0	0	0	0	1	0	0	0	0	0	0	0	0	0	0	0	0	0	32	0	3	0	0	0	2	7	2	1	3	7	2	2	0	d__Bacteria; p__Proteobacteria; c__Alphaproteobacteria; o__Acetobacterales; f__Acetobacteraceae
OTU_1621	0	0	0	0	0	0	0	0	0	0	3	0	0	0	0	0	3	0	11	0	0	9	0	0	0	20	0	0	0	0	0	0	0	0	0	0	0	0	0	0	0	0	0	0	1	Unclassified
OTU_1622	1	2	0	2	1	1	0	7	6	2	2	0	0	2	1	0	0	0	1	0	0	1	0	0	1	0	0	0	0	0	0	0	0	0	0	0	0	0	0	0	0	1	0	0	0	d__Bacteria; p__Gemmatimonadetes; c__Longimicrobia; o__Longimicrobiales; f__Longimicrobiaceae; g__Longimicrobiaceae_ge
OTU_1623	6	0	0	10	0	1	0	0	0	0	0	0	0	0	0	0	0	0	0	0	0	0	0	0	0	0	0	0	0	0	0	0	0	0	0	0	0	0	0	0	0	0	0	0	0	d__Bacteria; p__Firmicutes; c__Negativicutes; o__Selenomonadales; f__Veillonellaceae; g__Megasphaera
OTU_1624	1	2	0	2	1	1	3	1	5	2	1	3	4	2	0	0	0	0	1	0	0	0	0	0	2	0	1	0	0	0	0	0	0	1	0	0	0	0	0	0	0	0	0	0	0	d__Bacteria; p__Actinobacteria; c__Acidimicrobiia; o__Microtrichales; f__Ilumatobacteraceae; g__CL500_29_marine_group; s__metagenome
OTU_1626	2	1	4	0	0	1	3	3	4	1	1	1	0	0	2	0	0	0	1	0	0	0	0	0	0	0	0	0	0	0	0	0	0	0	0	0	0	0	0	0	1	0	0	0	0	d__Bacteria; p__Proteobacteria; c__Deltaproteobacteria; o__Myxococcales; f__Sandaracinaceae; g__uncultured
OTU_1627	0	0	2	0	1	3	4	2	3	3	0	0	0	0	0	0	0	0	0	0	0	0	0	0	0	0	0	0	0	0	0	0	0	0	0	0	0	0	0	0	0	0	0	0	0	d__Bacteria; p__Planctomycetes; c__Phycisphaerae; o__Tepidisphaerales; f__WD2101_soil_group; g__WD2101_soil_group_ge; s__uncultured_bacterium
OTU_1628	0	2	0	0	1	1	0	0	2	0	1	0	0	1	0	0	0	0	0	0	0	0	0	0	0	0	0	0	0	0	0	0	0	0	0	0	0	0	0	0	0	0	0	0	0	d__Bacteria; p__Acidobacteria; c__Thermoanaerobaculia; o__Thermoanaerobaculales; f__Thermoanaerobaculaceae; g__Subgroup_10
OTU_1629	0	0	0	0	1	0	0	0	0	0	0	7	0	0	0	0	0	3	0	0	0	0	0	0	0	0	0	0	0	0	3	0	0	0	0	0	0	0	0	0	0	0	0	0	0	d__Bacteria; p__Proteobacteria; c__Deltaproteobacteria; o__Oligoflexales; f__Oligoflexaceae; g__uncultured; s__uncultured_bacterium_Ak20_3
OTU_163	34	41	11	129	39	37	24	40	41	47	25	30	48	77	35	6	3	42	8	2	72	16	4	0	3	5	7	4	35	12	21	35	23	3	0	18	5	7	30	10	17	1	43	66	51	d__Bacteria; p__Proteobacteria; c__Alphaproteobacteria; o__Rhizobiales; f__Devosiaceae
OTU_1630	0	0	0	1	0	0	0	0	0	0	0	0	0	0	0	0	0	4	0	0	0	1	0	0	0	0	0	0	0	0	0	5	2	0	0	0	0	0	0	1	0	0	0	0	2	d__Bacteria; p__Proteobacteria; c__Gammaproteobacteria
OTU_1631	0	0	0	0	0	0	1	5	0	0	1	0	0	0	1	0	0	0	3	0	0	0	0	0	0	0	0	0	0	0	0	0	0	0	0	0	0	0	0	0	0	0	0	0	0	d__Bacteria; p__Chloroflexi; c__Chloroflexia; o__Chloroflexales; f__Herpetosiphonaceae; g__Herpetosiphon; s__uncultured_bacterium
OTU_1632	3	2	0	1	7	0	3	4	5	1	1	0	0	1	0	0	0	0	0	0	0	0	0	0	1	0	0	0	0	0	0	0	0	0	0	0	1	1	0	0	0	0	0	0	0	d__Bacteria; p__Gemmatimonadetes; c__Longimicrobia; o__Longimicrobiales; f__Longimicrobiaceae; g__Longimicrobiaceae_ge; s__uncultured_bacterium
OTU_1633	0	0	0	0	0	0	0	0	0	0	0	0	0	0	0	0	0	0	0	0	0	0	0	0	0	0	0	0	0	0	0	8	3	5	0	9	2	1	0	8	9	2	0	0	6	d__Bacteria; p__Proteobacteria; c__Alphaproteobacteria
OTU_1634	0	0	0	0	0	0	0	0	0	0	0	0	0	0	0	0	0	0	0	0	0	0	0	0	0	0	0	0	0	0	0	20	5	0	2	0	0	0	8	0	5	1	1	0	0	Unclassified
OTU_1635	0	0	0	0	0	0	0	0	0	0	0	0	1	0	0	0	0	0	6	14	0	0	1	0	3	1	0	0	0	0	0	0	0	0	0	0	0	0	0	0	0	0	0	0	0	Unclassified
OTU_1636	1	1	1	1	1	0	4	0	1	2	1	0	0	3	1	0	0	0	5	0	3	1	0	0	0	4	8	0	2	0	0	0	0	2	0	0	0	1	0	0	1	0	0	0	0	d__Bacteria; p__Firmicutes; c__Bacilli; o__Bacillales; f__Alicyclobacillaceae; g__Tumebacillus
OTU_1637	0	0	0	0	0	0	0	0	0	0	0	0	0	0	0	0	2	2	0	0	3	0	1	4	0	1	1	0	0	0	0	3	0	0	0	0	15	29	4	0	1	0	0	1	0	d__Bacteria
OTU_1638	1	0	0	0	2	0	0	2	2	2	0	1	0	0	0	16	0	5	6	4	1	8	4	1	32	9	4	6	2	2	0	7	0	0	0	0	0	0	1	0	0	0	0	0	0	d__Bacteria; p__Proteobacteria; c__Deltaproteobacteria; o__Bdellovibrionales; f__Bacteriovoracaceae; g__Peredibacter
OTU_1639	0	0	1	1	1	7	1	1	3	2	2	0	3	3	0	0	0	0	0	0	0	0	0	0	0	0	0	0	0	0	0	0	0	0	0	0	0	0	0	0	0	0	0	0	0	d__Bacteria; p__Acidobacteria; c__Blastocatellia_Subgroup_4; o__11_24; f__11_24_fa; g__11_24_ge
OTU_164	29	88	7	93	152	28	14	10	7	161	30	14	39	33	13	0	1	17	4	8	44	2	17	0	9	8	18	1	3	0	0	5	1	0	0	0	3	6	9	13	0	1	8	17	17	d__Bacteria; p__Proteobacteria; c__Deltaproteobacteria; o__Oligoflexales; f__Oligoflexaceae; g__Oligoflexus; s__Thymallus_thymallus_grayling
OTU_1640	2	2	3	0	1	6	0	0	15	0	0	0	0	1	1	0	0	0	0	0	0	0	0	0	0	0	0	0	0	0	0	0	0	2	0	0	0	0	0	0	0	0	0	0	0	d__Bacteria; p__Firmicutes; c__Clostridia; o__Clostridiales; f__Ruminococcaceae; g__Subdoligranulum; s__uncultured_bacterium
OTU_1641	3	1	0	0	0	0	2	1	1	2	0	2	2	5	1	0	0	0	0	0	0	0	0	0	0	0	0	0	0	0	0	0	0	0	0	0	0	0	0	0	0	0	0	0	0	d__Bacteria; p__Chloroflexi; c__Chloroflexia; o__Thermomicrobiales; f__JG30_KF_CM45; g__JG30_KF_CM45_ge; s__uncultured_bacterium
OTU_1642	0	1	0	0	8	0	0	0	0	0	0	1	0	0	0	0	0	0	0	0	0	0	0	0	0	0	0	0	0	0	0	0	0	0	0	0	0	0	0	0	0	0	0	0	0	d__Bacteria; p__FBP; c__FBP_cl; o__FBP_or; f__FBP_fa; g__FBP_ge
OTU_1643	0	1	0	0	4	0	1	2	1	1	0	2	1	1	1	0	0	0	0	0	0	0	0	0	0	0	1	0	0	0	0	0	0	0	0	0	0	0	0	0	0	0	0	0	0	d__Bacteria; p__Proteobacteria; c__Deltaproteobacteria
OTU_1646	0	0	0	0	0	0	0	0	0	0	0	0	0	0	0	0	0	0	0	0	0	0	0	0	0	0	0	0	0	0	1	6	2	2	0	0	6	3	0	0	2	26	0	0	0	d__Bacteria; p__Proteobacteria; c__Gammaproteobacteria; o__Betaproteobacteriales; f__Neisseriaceae; g__uncultured
OTU_1647	0	0	1	0	0	0	3	0	4	1	0	1	1	0	0	0	0	0	0	0	0	0	0	0	0	0	0	0	0	0	0	0	0	0	0	0	0	0	0	0	0	0	0	0	0	d__Bacteria; p__Gemmatimonadetes; c__Longimicrobia; o__Longimicrobiales; f__Longimicrobiaceae; g__Longimicrobiaceae_ge; s__uncultured_bacterium
OTU_1648	0	0	0	0	0	0	0	0	4	0	0	0	0	0	0	8	1	15	0	0	8	42	18	1	0	1	13	15	6	3	0	0	0	0	0	0	0	1	0	0	0	0	0	0	0	d__Bacteria; p__Bacteroidetes; c__Bacteroidia; o__Cytophagales; f__Hymenobacteraceae; g__Hymenobacter
OTU_1649	4	4	3	1	1	0	1	0	3	4	1	0	1	1	0	0	0	0	0	0	0	0	0	0	0	0	0	0	0	0	0	0	0	0	0	0	0	0	0	0	0	0	0	0	0	d__Bacteria; p__Chloroflexi; c__Anaerolineae; o__SBR1031; f__A4b; g__A4b_ge; s__uncultured_soil_bacterium
OTU_165	0	0	0	0	0	0	0	0	0	0	0	0	0	0	0	2	3	3	0	0	128	20	28	146	19	7	137	802	650	12	9	283	59	39	5	11	199	92	64	27	147	35	34	341	269	d__Bacteria; p__Bacteroidetes; c__Bacteroidia; o__Cytophagales; f__Spirosomaceae; g__Spirosoma
OTU_1650	0	0	0	0	0	0	0	0	0	0	0	0	0	0	0	0	0	0	0	0	0	0	0	0	0	0	0	0	0	0	1	0	1	0	1	0	3	2	3	4	35	7	46	1	2	d__Bacteria; p__Bacteroidetes; c__Bacteroidia; o__Cytophagales; f__Hymenobacteraceae; g__Hymenobacter
OTU_1652	0	0	4	0	0	0	0	0	0	0	0	0	0	0	0	0	0	0	3	15	1	0	0	26	6	1	1	0	0	0	0	0	0	0	0	0	0	0	0	0	0	0	0	0	0	Unclassified
OTU_1653	0	0	1	0	1	1	0	0	1	0	1	1	0	0	2	0	0	0	1	2	0	0	0	0	1	0	0	0	0	0	0	0	0	0	0	0	1	0	0	0	0	0	0	0	0	d__Bacteria; p__Actinobacteria; c__Acidimicrobiia; o__Microtrichales; f__Microtrichaceae; g__uncultured; s__metagenome
OTU_1654	0	0	0	0	0	0	0	0	0	0	0	0	0	0	0	0	0	1	0	0	0	0	1	0	0	0	0	0	0	0	18	12	8	2	0	4	20	9	20	3	18	22	3	0	0	d__Bacteria; p__Planctomycetes; c__Planctomycetacia; o__Isosphaerales; f__Isosphaeraceae; g__Singulisphaera
OTU_1655	0	3	0	0	2	2	0	0	1	1	1	1	2	6	0	0	0	0	0	0	0	0	0	0	1	0	0	0	0	0	0	0	0	0	0	0	0	0	0	0	0	0	0	0	0	d__Bacteria; p__Proteobacteria; c__Deltaproteobacteria; o__Oligoflexales; f__0319_6G20; g__0319_6G20_ge; s__uncultured_bacterium
OTU_1656	1	0	0	2	2	0	1	2	4	1	0	2	0	1	0	0	0	0	0	0	0	0	0	0	0	0	0	0	0	0	0	0	0	0	0	0	0	0	0	0	0	0	0	0	0	d__Bacteria; p__Chloroflexi; c__Anaerolineae; o__Ardenticatenales; f__Ardenticatenaceae; g__uncultured; s__uncultured_bacterium
OTU_1657	2	2	2	0	0	0	2	1	14	0	2	1	0	0	1	0	0	0	3	0	1	0	0	0	0	0	0	0	0	0	0	0	0	0	1	0	0	0	0	0	0	0	0	0	0	d__Bacteria; p__Actinobacteria; c__Acidimicrobiia; o__Microtrichales; f__uncultured; g__uncultured_ge
OTU_1658	1	0	1	1	0	0	2	0	1	2	2	2	3	2	0	0	0	0	1	1	0	1	0	0	0	0	0	0	0	0	0	0	0	0	2	0	0	0	0	0	0	0	0	0	0	d__Bacteria; p__Entotheonellaeota; c__Entotheonellia; o__Entotheonellales; f__Entotheonellaceae; g__Entotheonellaceae_ge; s__uncultured_bacterium
OTU_1659	100	140	30	97	49	13	581	12	16	122	31	12	38	57	21	1129	636	189	168	122	135	178	381	268	110	124	61	217	73	243	184	121	86	161	10	34	94	100	25	14	62	69	38	69	66	d__Bacteria; p__Bacteroidetes; c__Bacteroidia; o__Cytophagales; f__Hymenobacteraceae; g__Hymenobacter; s__uncultured_bacterium
OTU_166	39	67	27	25	51	34	60	55	80	20	31	25	22	25	11	4	4	19	27	1	15	3	0	2	17	6	9	1	4	5	3	6	0	2	1	1	2	0	3	0	1	1	0	2	1	d__Bacteria; p__Proteobacteria; c__Deltaproteobacteria; o__Myxococcales
OTU_1660	1	1	0	1	0	0	0	0	4	1	0	0	2	1	1	0	0	0	0	0	0	0	0	0	0	0	1	0	0	0	0	0	0	0	0	0	0	0	0	0	0	0	0	0	0	d__Bacteria; p__Bacteroidetes; c__Bacteroidia; o__Cytophagales; f__Microscillaceae; g__uncultured; s__uncultured_soil_bacterium
OTU_1661	1	0	0	1	0	0	2	1	2	1	1	1	0	0	0	0	0	0	0	0	0	0	0	0	0	0	0	0	0	0	0	0	0	0	0	0	0	0	0	0	0	0	0	0	0	d__Bacteria; p__Bacteroidetes; c__Bacteroidia; o__Chitinophagales
OTU_1662	0	0	0	1	1	0	0	2	0	0	1	0	0	0	0	0	0	0	1	0	1	0	0	0	1	0	0	0	0	0	0	0	0	3	0	0	1	0	0	0	0	0	0	0	0	d__Bacteria; p__Planctomycetes; c__Planctomycetacia; o__Isosphaerales; f__Isosphaeraceae; g__uncultured; s__uncultured_Singulisphaera_sp.
OTU_1663	1	0	0	0	1	2	1	0	1	0	2	3	3	1	0	0	0	0	1	0	0	0	0	0	0	0	0	0	0	0	0	0	0	0	0	0	0	0	0	0	0	0	0	0	0	d__Bacteria; p__Proteobacteria; c__Alphaproteobacteria; o__Rhodospirillales; f__Rhodospirillaceae; g__uncultured; s__metagenome
OTU_1664	0	1	7	1	1	4	3	1	1	1	0	0	1	0	0	0	0	0	15	1	0	0	0	0	0	0	0	0	0	0	0	0	0	0	7	0	0	0	0	0	0	0	0	0	0	d__Bacteria; p__Proteobacteria; c__Deltaproteobacteria; o__NB1_j; f__NB1_j_fa; g__NB1_j_ge
OTU_1665	3	1	1	1	1	1	7	0	5	2	2	2	4	1	1	0	0	0	16	0	0	2	0	0	2	0	3	0	0	0	0	0	1	0	0	0	0	0	0	0	0	0	0	0	0	d__Bacteria; p__Actinobacteria; c__Acidimicrobiia; o__Microtrichales; f__uncultured; g__uncultured_ge; s__wastewater_metagenome
OTU_1666	4	14	10	4	9	5	11	11	22	23	6	1	6	3	1	0	0	0	11	0	0	0	0	0	0	0	4	0	0	0	0	0	0	0	8	0	0	0	0	0	0	0	0	1	0	d__Bacteria; p__Acidobacteria; c__Subgroup_6; o__Subgroup_6_or; f__Subgroup_6_fa; g__Subgroup_6_ge
OTU_1668	0	1	1	0	0	0	7	1	1	0	4	0	0	0	0	0	0	0	7	0	0	0	0	0	1	0	0	0	0	0	0	0	0	0	0	1	0	0	0	0	0	0	0	0	0	d__Bacteria; p__Bacteroidetes; c__Bacteroidia; o__Cytophagales; f__Microscillaceae; g__uncultured; s__metagenome
OTU_1669	1	0	1	1	1	0	0	0	0	0	0	1	0	0	1	0	1	1	1	0	1	1	12	0	1	0	0	0	0	0	27	17	16	5	2	0	14	11	8	6	5	20	0	1	1	d__Bacteria; p__Actinobacteria; c__Actinobacteria; o__Frankiales; f__Frankiaceae; g__Jatrophihabitans
OTU_1670	1	2	0	1	0	0	3	2	3	3	0	1	2	1	0	0	0	0	18	3	0	1	0	0	2	2	2	0	0	0	0	0	0	0	0	0	0	0	0	0	0	1	0	0	0	d__Bacteria; p__Actinobacteria; c__Thermoleophilia; o__Gaiellales
OTU_1671	0	0	0	0	0	0	0	0	0	0	0	0	0	0	0	0	0	0	0	0	0	0	0	0	0	0	0	0	0	0	0	0	0	0	0	85	1	3	1	0	0	0	0	0	0	Unclassified
OTU_1672	0	1	3	0	0	1	2	0	0	0	0	0	0	0	0	0	0	0	0	0	0	0	0	0	0	0	1	0	0	0	0	0	0	0	0	0	0	0	0	1	0	0	0	0	0	d__Bacteria; p__Actinobacteria; c__Actinobacteria; o__Micrococcales; f__Micrococcaceae; g__Enteractinococcus
OTU_1673	3	1	3	0	0	1	1	1	5	2	1	4	2	1	1	0	0	0	0	0	0	0	0	0	0	1	1	0	0	0	0	0	0	0	0	0	0	1	0	0	0	0	0	0	0	d__Bacteria; p__Proteobacteria; c__Alphaproteobacteria; o__Tistrellales; f__Geminicoccaceae; g__uncultured
OTU_1676	1	0	2	0	1	0	3	1	2	0	2	2	0	0	0	0	0	0	52	3	8	0	0	1	17	12	16	0	0	1	0	1	0	0	1	0	0	0	0	2	0	0	0	0	0	d__Bacteria; p__Proteobacteria; c__Alphaproteobacteria; o__Tistrellales; f__Geminicoccaceae; g__Candidatus_Alysiosphaera; s__metagenome
OTU_1677	1	6	0	0	11	2	1	4	4	21	4	6	7	8	1	0	0	0	0	0	3	1	2	0	0	0	1	4	6	0	0	0	0	0	0	0	0	0	0	0	1	0	0	0	2	d__Bacteria; p__FBP; c__FBP_cl; o__FBP_or; f__FBP_fa; g__FBP_ge
OTU_1678	10	3	2	37	22	31	4	4	2	7	7	2	5	5	5	19	6	51	5	1	39	62	52	10	1	46	12	12	28	65	1	4	1	11	0	1	1	0	0	3	7	1	8	50	15	d__Bacteria; p__Proteobacteria; c__Alphaproteobacteria; o__Sphingomonadales; f__Sphingomonadaceae
OTU_1679	0	5	1	0	0	0	2	0	0	0	0	0	0	0	0	0	0	0	0	0	0	0	0	0	0	0	0	0	0	0	0	0	0	0	0	0	0	0	0	0	0	0	0	0	0	d__Bacteria; p__Deinococcus_Thermus; c__Deinococci; o__Deinococcales; f__Deinococcaceae; g__Deinococcus
OTU_168	16	35	7	12	85	7	14	4	6	150	34	3	34	65	7	4	0	11	0	0	4	5	2	3	1	9	7	1	9	9	0	2	11	0	0	0	3	0	1	0	0	0	0	10	2	d__Bacteria; p__FBP; c__FBP_cl; o__FBP_or; f__FBP_fa; g__FBP_ge
OTU_1680	0	0	0	1	0	0	0	6	0	0	0	0	0	0	0	0	0	0	0	0	0	0	0	0	0	0	0	0	0	0	0	0	0	0	0	0	0	0	0	0	0	0	0	0	0	d__Bacteria; p__Bacteroidetes; c__Bacteroidia; o__Cytophagales; f__Microscillaceae; g__uncultured; s__Hymenobacter_sp._9PNM_21
OTU_1681	0	0	0	0	0	0	0	0	0	0	0	0	0	0	0	1	1	18	0	2	7	32	0	0	0	0	17	0	3	0	0	0	0	0	0	0	2	1	3	0	6	2	1	5	2	d__Bacteria; p__Proteobacteria; c__Deltaproteobacteria; o__Myxococcales; f__Phaselicystidaceae; g__Phaselicystis
OTU_1682	0	2	0	1	1	0	4	2	8	2	1	2	0	1	1	0	0	0	0	0	0	0	0	0	0	0	0	0	0	0	0	0	0	0	0	0	0	0	0	0	0	0	0	0	0	d__Bacteria; p__Chloroflexi; c__Anaerolineae; o__SBR1031; f__A4b; g__A4b_ge; s__uncultured_bacterium
OTU_1683	1	0	0	14	0	0	0	0	0	0	0	0	0	0	0	0	0	0	0	0	0	0	0	0	2	0	0	0	0	0	0	0	0	0	0	0	0	0	0	0	0	0	0	0	0	d__Bacteria; p__Proteobacteria; c__Gammaproteobacteria; o__Gammaproteobacteria_Incertae_Sedis; f__Unknown_Family; g__Unknown_Family_ge; s__uncultured_soil_bacterium
OTU_1684	0	0	0	0	0	0	0	0	0	0	0	0	0	0	0	0	0	24	0	0	0	0	0	0	0	0	0	0	0	0	0	2	0	5	0	0	3	0	0	0	4	0	2	0	1	d__Bacteria; p__Planctomycetes; c__Phycisphaerae; o__Tepidisphaerales; f__WD2101_soil_group; g__WD2101_soil_group_ge
OTU_1685	0	0	0	0	0	0	0	0	2	0	0	0	0	0	0	0	0	0	0	0	0	0	2	2	9	0	18	0	50	13	0	0	0	3	0	0	0	0	0	0	0	0	1	3	2	Unclassified
OTU_1686	0	2	0	0	1	1	1	1	3	0	1	0	1	2	0	0	0	0	0	0	0	0	0	0	0	0	0	0	0	0	0	0	0	0	0	0	0	0	0	0	0	0	0	0	0	d__Bacteria; p__Planctomycetes; c__Phycisphaerae; o__Tepidisphaerales; f__WD2101_soil_group; g__WD2101_soil_group_ge; s__uncultured_bacterium
OTU_1687	0	0	0	0	0	0	0	0	0	0	0	0	0	0	0	0	0	1	0	0	0	0	0	0	0	0	0	0	0	0	4	3	0	1	1	4	0	0	0	3	5	21	0	1	0	d__Bacteria
OTU_1688	1	4	0	0	2	1	0	0	0	1	0	2	0	1	0	0	0	0	0	0	0	0	0	0	0	0	0	0	0	0	0	0	0	0	0	0	0	0	0	0	0	0	0	0	0	d__Bacteria; p__Deinococcus_Thermus; c__Deinococci; o__Deinococcales; f__Deinococcaceae; g__Deinococcus
OTU_1689	0	0	0	0	0	0	1	0	1	0	0	0	0	0	0	0	2	7	0	0	9	1	0	5	0	15	3	3	1	1	0	0	1	2	0	13	0	0	0	0	1	5	2	10	6	d__Bacteria; p__Proteobacteria; c__Deltaproteobacteria; o__Myxococcales; f__Polyangiaceae; g__Pajaroellobacter
OTU_169	72	109	80	29	57	59	87	3	7	278	102	29	74	133	66	115	321	139	518	81	134	442	79	138	59	63	60	234	54	436	2	2	2	23	0	0	2	5	0	4	3	1	6	11	4	d__Bacteria; p__Bacteroidetes; c__Bacteroidia; o__Cytophagales; f__Hymenobacteraceae; g__Hymenobacter
OTU_1690	1	5	4	0	7	5	0	0	0	0	0	0	0	0	0	0	0	0	0	0	0	0	0	0	0	0	0	0	0	0	0	0	0	0	0	0	0	0	0	0	0	0	0	0	0	d__Bacteria; p__Bacteroidetes; c__Bacteroidia; o__Bacteroidales; f__Rikenellaceae; g__Alistipes
OTU_1691	1	1	0	0	0	0	0	0	0	0	1	0	1	0	0	0	0	0	31	1	3	0	0	0	1	0	7	0	1	1	0	0	0	1	6	0	0	0	0	2	0	0	0	0	0	d__Bacteria; p__Actinobacteria; c__Thermoleophilia; o__Gaiellales; f__uncultured; g__uncultured_ge
OTU_1692	0	0	0	0	0	0	1	0	1	0	1	1	0	2	1	0	0	0	0	0	0	0	0	0	0	0	2	0	0	0	0	0	1	0	0	0	0	0	0	0	0	0	0	0	0	d__Bacteria
OTU_1694	4	35	2	1	1	3	0	12	0	0	1	4	2	1	0	0	1	6	0	0	8	2	0	0	1	4	5	0	5	0	1	0	0	3	0	0	3	4	12	2	6	0	2	14	8	d__Bacteria; p__Bacteroidetes; c__Bacteroidia; o__Cytophagales; f__Spirosomaceae; g__Spirosoma
OTU_1695	5	10	8	6	6	10	11	18	31	9	3	11	16	15	8	2	0	1	45	6	3	1	2	1	11	1	8	0	2	0	0	0	0	2	1	0	1	1	0	0	1	1	6	24	6	d__Bacteria; p__Proteobacteria; c__Alphaproteobacteria; o__Rhizobiales; f__Rhizobiaceae; g__Mesorhizobium
OTU_1696	0	0	0	0	0	0	0	0	0	0	0	0	0	0	0	10	2	0	0	13	2	1	6	5	6	9	11	1	1	1	2	5	0	1	0	2	1	8	0	0	4	1	0	1	1	d__Bacteria
OTU_1697	0	0	0	0	0	0	0	0	0	0	0	0	0	0	0	0	0	0	0	0	0	0	0	0	0	0	0	0	0	0	13	7	26	4	3	1	7	14	6	7	24	19	0	0	0	d__Bacteria; p__Acidobacteria; c__Acidobacteriia; o__Acidobacteriales; f__Acidobacteriaceae_Subgroup_1; g__Edaphobacter
OTU_1698	3	1	2	1	5	4	3	5	7	1	2	0	1	2	1	0	0	0	1	0	0	0	0	0	0	0	1	0	0	0	0	0	0	0	0	0	0	0	0	0	0	0	0	0	0	d__Bacteria; p__Proteobacteria; c__Deltaproteobacteria; o__Myxococcales; f__Haliangiaceae; g__Haliangium
OTU_17	1353	1603	457	494	1873	419	1357	207	213	922	1047	206	512	661	144	17	17	651	7	11	442	44	60	5	67	61	188	18	148	99	0	2	0	3	1	0	5	5	1	1	1	0	19	77	7	d__Bacteria; p__Proteobacteria; c__Alphaproteobacteria; o__Rhodobacterales; f__Rhodobacteraceae; g__Rubellimicrobium; s__uncultured_bacterium
OTU_170	36	13	3	12	8	0	11	2	0	48	34	1	50	55	4	1	1	0	5	6	9	0	0	12	2	0	1	3	0	0	0	0	0	0	0	0	0	0	0	0	0	0	0	0	0	Unclassified
OTU_1700	0	2	1	1	3	1	4	0	10	3	1	3	2	0	5	0	0	0	6	0	0	0	0	0	1	0	0	0	0	1	0	0	0	0	0	0	0	0	0	0	0	0	0	0	0	d__Bacteria; p__Actinobacteria; c__Thermoleophilia; o__Solirubrobacterales; f__67_14; g__67_14_ge; s__uncultured_bacterium
OTU_1701	0	0	3	0	3	0	0	0	1	1	3	0	0	1	0	1	0	0	6	0	0	0	0	0	0	0	1	0	0	0	0	0	0	0	0	0	0	0	0	0	0	0	0	0	0	d__Bacteria; p__Proteobacteria; c__Gammaproteobacteria; o__Betaproteobacteriales; f__SC_I_84; g__SC_I_84_ge; s__uncultured_bacterium
OTU_1703	1	3	4	0	4	1	0	0	8	2	1	2	2	1	1	0	0	0	1	0	0	0	0	0	1	0	3	0	0	0	0	0	0	0	0	0	0	0	0	0	0	0	0	0	0	d__Bacteria; p__Planctomycetes; c__Planctomycetacia; o__Pirellulales; f__Pirellulaceae; g__uncultured
OTU_1704	0	0	0	0	0	0	0	0	0	0	0	0	0	0	0	0	0	0	0	0	0	0	0	0	0	0	1	0	0	0	5	9	2	0	0	9	3	1	6	0	4	0	2	24	6	d__Bacteria; p__Bacteroidetes; c__Bacteroidia; o__Chitinophagales; f__Chitinophagaceae
OTU_1705	0	6	7	11	15	6	10	5	2	62	12	2	13	12	12	0	0	0	0	0	0	0	0	0	0	0	0	0	0	0	0	0	0	0	0	0	0	0	0	0	0	0	0	0	0	d__Bacteria; p__Proteobacteria; c__Deltaproteobacteria; o__Oligoflexales; f__Oligoflexaceae; g__Oligoflexus; s__uncultured_proteobacterium
OTU_1706	0	0	0	2	0	0	0	1	2	1	0	0	0	0	0	0	0	0	0	0	0	0	0	0	0	0	2	0	0	0	0	0	0	0	0	0	0	0	0	0	0	2	0	0	0	d__Bacteria; p__Verrucomicrobia; c__Verrucomicrobiae; o__Chthoniobacterales; f__Chthoniobacteraceae; g__Chthoniobacter; s__uncultured_Spartobacteria_bacterium
OTU_1707	0	2	0	3	3	2	2	4	0	3	7	7	0	0	1	0	0	0	0	0	0	0	0	0	0	0	1	0	0	0	0	0	0	0	0	0	0	0	0	0	0	0	0	0	2	d__Bacteria; p__Actinobacteria; c__Acidimicrobiia; o__Microtrichales; f__Ilumatobacteraceae; g__uncultured; s__uncultured_actinobacterium
OTU_1709	16	26	24	15	13	26	33	31	48	40	22	22	27	15	24	0	0	2	39	8	6	3	1	1	3	14	24	0	3	3	20	4	2	0	1	0	1	0	11	0	2	4	2	0	0	d__Bacteria; p__Proteobacteria; c__Alphaproteobacteria; o__Sphingomonadales; f__Sphingomonadaceae; g__Ellin6055
OTU_171	18	13	6	66	15	5	18	187	28	15	16	18	7	5	4	0	0	0	5	3	1	0	0	0	4	1	4	0	0	0	0	0	0	1	1	0	0	0	0	0	0	0	0	0	0	d__Bacteria; p__Proteobacteria; c__Alphaproteobacteria; o__Sphingomonadales; f__Sphingomonadaceae; g__Qipengyuania; s__uncultured_bacterium
OTU_1710	0	0	0	0	0	2	3	1	1	4	4	0	1	1	1	1	0	0	14	0	2	1	0	0	4	2	6	0	0	0	0	0	0	0	2	0	0	0	0	0	0	0	0	0	1	d__Bacteria; p__Planctomycetes; c__Planctomycetacia; o__Pirellulales; f__Pirellulaceae; g__Pir4_lineage
OTU_1712	4	0	0	1	0	0	0	0	0	0	0	0	1	0	0	1	0	1	0	0	0	0	0	0	0	3	3	0	1	0	1	1	0	0	0	0	2	1	5	3	14	1	9	15	11	d__Bacteria; p__Proteobacteria; c__Deltaproteobacteria; o__Oligoflexales; f__0319_6G20; g__0319_6G20_ge
OTU_1713	8	22	8	9	9	6	16	30	38	18	11	22	14	10	5	2	0	0	10	0	2	1	0	0	4	2	1	0	0	0	0	1	0	2	0	0	3	0	0	2	1	0	0	0	0	d__Bacteria; p__Actinobacteria; c__Thermoleophilia; o__Solirubrobacterales; f__Solirubrobacteraceae; g__Solirubrobacter; s__uncultured_bacterium
OTU_1715	0	0	0	0	7	1	1	2	0	5	2	4	0	0	0	0	0	0	0	0	0	0	0	0	0	0	0	0	0	0	0	0	0	0	0	0	0	0	0	0	0	0	0	0	0	d__Bacteria; p__FBP; c__FBP_cl; o__FBP_or; f__FBP_fa; g__FBP_ge; s__uncultured_bacterium
OTU_1717	0	0	0	0	0	0	0	0	0	2	0	0	5	0	0	0	0	0	0	0	1	0	0	0	0	0	0	0	0	0	0	0	0	0	0	0	0	0	0	0	0	0	0	0	0	d__Bacteria; p__Proteobacteria; c__Gammaproteobacteria
OTU_1718	0	0	5	0	1	1	2	0	9	0	0	1	1	1	0	0	0	0	0	0	0	0	0	0	0	0	0	0	0	0	0	0	0	0	1	0	0	0	0	0	0	0	0	0	0	d__Bacteria; p__Verrucomicrobia; c__Verrucomicrobiae; o__Pedosphaerales; f__Pedosphaeraceae
OTU_1719	0	2	1	2	0	0	3	5	5	2	4	1	2	1	1	0	0	0	1	4	1	0	0	0	2	0	4	0	0	0	0	0	0	0	0	0	0	0	0	0	0	0	0	0	0	d__Bacteria; p__Verrucomicrobia; c__Verrucomicrobiae; o__Chthoniobacterales; f__Chthoniobacteraceae; g__Chthoniobacter
OTU_172	4	2	3	15	39	11	12	12	2	57	54	99	13	26	8	0	0	0	0	0	0	0	0	0	0	0	0	0	0	0	0	0	0	0	0	0	2	0	0	2	0	0	0	0	0	d__Bacteria; p__Proteobacteria
OTU_1720	0	0	0	0	0	0	0	0	0	0	0	0	0	0	0	0	0	0	0	0	0	0	0	0	0	0	0	0	0	0	2	2	1	0	0	0	6	6	6	0	13	3	0	4	2	d__Bacteria
OTU_1721	0	3	3	2	3	2	3	1	5	2	2	0	5	0	3	0	0	0	0	1	0	0	0	0	0	0	0	0	0	0	0	0	0	0	0	0	0	0	0	0	0	0	0	0	0	d__Bacteria; p__Bacteroidetes; c__Bacteroidia; o__Chitinophagales; f__Chitinophagaceae; g__Segetibacter
OTU_1722	0	0	0	0	0	0	0	0	0	0	0	0	0	0	0	0	0	0	0	0	0	0	0	0	0	0	0	0	0	0	0	0	0	0	0	0	0	1	0	1	0	0	5	17	1	d__Bacteria; p__Patescibacteria; c__Saccharimonadia; o__Saccharimonadales
OTU_1723	0	1	2	0	1	3	17	21	2073	0	0	4	6	1	13	0	0	0	0	0	0	0	0	0	1	0	0	0	0	0	0	0	0	0	1	0	1	0	0	0	1	0	0	0	0	d__Bacteria; p__Firmicutes; c__Bacilli; o__Bacillales; f__Bacillaceae; g__Bacillus; s__Bacillus_halosaccharovorans
OTU_1725	0	0	0	0	0	0	1	9	2	0	0	0	0	0	0	0	0	0	0	0	0	0	0	0	0	0	0	0	0	0	0	0	0	0	0	0	0	0	0	0	0	0	0	0	0	d__Bacteria; p__Firmicutes; c__Clostridia; o__Clostridiales; f__Lachnospiraceae; g__Lachnospira; s__uncultured_bacterium
OTU_1726	1	1	3	0	0	3	2	3	3	1	2	2	1	2	0	0	0	0	0	0	0	0	0	0	0	0	0	0	0	0	0	0	0	0	1	0	0	0	0	0	0	0	0	0	0	d__Bacteria; p__Acidobacteria; c__Subgroup_17; o__Subgroup_17_or; f__Subgroup_17_fa; g__Subgroup_17_ge; s__uncultured_Acidobacteria_bacterium
OTU_1727	0	0	1	0	0	0	0	2	0	0	0	0	0	0	0	0	0	13	0	0	0	0	28	0	8	1	0	0	1	0	0	0	0	0	0	1	1	0	1	0	0	0	0	1	5	d__Bacteria; p__Proteobacteria; c__Alphaproteobacteria; o__Sphingomonadales; f__Sphingomonadaceae
OTU_1728	0	1	0	0	1	0	0	0	0	1	0	0	0	0	0	1	0	1	0	0	0	2	4	0	0	0	0	0	2	0	3	8	15	2	2	0	5	22	0	2	6	26	7	7	34	d__Bacteria; p__Planctomycetes; c__Planctomycetacia; o__Isosphaerales; f__Isosphaeraceae
OTU_1729	0	0	0	0	0	0	0	0	0	0	0	0	0	0	0	0	0	0	0	0	0	0	0	0	0	0	0	0	0	0	7	13	1	0	0	0	0	2	1	1	8	10	0	0	0	d__Bacteria; p__Acidobacteria; c__Acidobacteriia; o__Acidobacteriales; f__Acidobacteriaceae_Subgroup_1; g__Bryocella; s__uncultured_bacterium
OTU_173	40	32	23	68	98	70	21	61	29	108	153	83	40	15	4	3	2	163	10	1	63	6	4	2	9	14	11	0	19	9	170	162	47	109	7	19	198	159	176	120	146	42	311	205	168	d__Bacteria; p__Actinobacteria; c__Actinobacteria; o__Pseudonocardiales; f__Pseudonocardiaceae; g__Actinomycetospora
OTU_1730	1	2	1	0	0	0	0	2	2	1	0	0	0	0	0	0	0	0	0	0	0	0	0	0	0	0	1	0	0	0	0	0	0	0	0	0	0	0	0	0	0	0	0	0	0	d__Bacteria; p__Planctomycetes; c__Phycisphaerae; o__Tepidisphaerales; f__WD2101_soil_group; g__WD2101_soil_group_ge
OTU_1731	0	0	1	0	0	1	2	0	3	0	0	1	0	0	0	0	0	0	0	0	0	0	0	0	0	0	0	0	0	0	0	0	0	0	0	0	0	0	0	0	0	0	0	0	0	d__Bacteria; p__Proteobacteria; c__Deltaproteobacteria; o__Myxococcales; f__P3OB_42; g__P3OB_42_ge
OTU_1732	0	2	0	1	1	0	0	2	0	2	0	0	0	0	0	0	0	0	0	0	0	0	0	0	0	0	0	0	0	0	0	0	0	0	2	0	0	0	0	0	0	0	0	0	0	d__Bacteria; p__Verrucomicrobia; c__Verrucomicrobiae; o__Pedosphaerales; f__Pedosphaeraceae; g__Pedosphaeraceae_ge; s__uncultured_bacterium
OTU_1733	0	0	0	0	0	0	0	0	0	0	0	0	0	0	0	8	3	0	1	9	0	0	0	0	1	4	2	0	0	0	1	3	0	0	0	0	0	0	0	1	1	1	0	0	0	d__Bacteria; p__Planctomycetes; c__Phycisphaerae; o__Phycisphaerales; f__Phycisphaeraceae
OTU_1734	35	63	15	24	61	13	21	9	3	85	42	12	25	15	6	0	0	31	1	3	31	7	4	0	5	0	5	0	2	4	6	2	4	34	4	3	1	3	0	4	6	4	1	0	0	d__Bacteria; p__Proteobacteria; c__Alphaproteobacteria; o__Sphingomonadales; f__Sphingomonadaceae; g__Sphingomonas
OTU_1735	3	3	0	0	1	2	0	1	3	2	0	0	0	0	0	0	0	0	0	0	0	0	0	0	0	0	0	0	0	0	0	0	0	0	0	0	0	0	0	0	0	0	0	0	0	d__Bacteria; p__Chloroflexi; c__Chloroflexia; o__Kallotenuales; f__AKIW781; g__AKIW781_ge
OTU_1736	0	0	0	0	0	0	0	0	0	0	0	0	0	0	0	0	0	0	0	0	0	0	0	0	0	0	0	0	0	0	0	0	2	0	0	0	0	0	0	0	0	0	0	25	8	d__Bacteria
OTU_1737	4	1	3	2	0	1	8	3	7	3	2	2	2	1	2	0	0	0	10	0	1	0	0	0	1	0	0	0	0	0	0	0	0	1	0	0	2	0	0	0	1	0	0	0	0	d__Bacteria; p__Proteobacteria; c__Gammaproteobacteria; o__R7C24; f__R7C24_fa; g__R7C24_ge; s__metagenome
OTU_1738	0	0	1	0	3	1	0	1	1	0	1	1	1	0	1	0	0	0	0	0	0	0	0	0	0	0	0	0	0	0	0	0	0	0	0	0	0	0	0	0	0	0	0	0	0	d__Bacteria; p__Proteobacteria; c__Alphaproteobacteria; o__Acetobacterales; f__Acetobacteraceae; g__Craurococcus
OTU_1739	0	0	1	0	0	0	1	0	2	0	0	0	1	0	1	0	0	0	7	0	0	0	0	0	0	0	1	0	0	0	1	0	0	0	1	0	0	0	0	0	0	0	0	0	0	d__Bacteria; p__Verrucomicrobia; c__Verrucomicrobiae; o__Pedosphaerales; f__Pedosphaeraceae; g__Pedosphaeraceae_ge
OTU_174	22	50	27	21	30	21	53	84	99	61	34	35	30	25	20	0	1	0	11	1	0	0	0	0	0	0	0	0	0	0	0	0	0	0	0	0	0	0	0	0	0	0	0	0	0	d__Bacteria; p__Actinobacteria; c__Thermoleophilia; o__Solirubrobacterales; f__Solirubrobacteraceae; g__uncultured; s__metagenome
OTU_1740	0	0	0	0	0	0	0	0	0	0	0	0	0	0	0	0	0	0	0	0	0	0	0	0	0	2	0	0	0	0	0	0	1	0	0	0	0	0	0	16	5	3	0	0	0	d__Bacteria; p__Firmicutes; c__Bacilli; o__Lactobacillales; f__Lactobacillaceae; g__Lactobacillus; s__Lactobacillus_gasseri
OTU_1741	0	1	0	0	0	1	4	1	1	1	0	0	0	1	0	0	0	0	0	0	0	0	0	0	0	0	0	0	0	0	0	0	0	0	0	0	0	0	0	0	0	0	0	0	0	d__Bacteria; p__Patescibacteria; c__Parcubacteria
OTU_1742	0	0	0	0	1	0	0	0	0	0	1	0	0	0	0	0	3	19	0	2	2	4	17	0	1	0	4	7	28	0	5	43	13	1	1	6	12	2	3	6	3	3	36	52	74	d__Bacteria; p__Proteobacteria; c__Alphaproteobacteria; o__Acetobacterales; f__Acetobacteraceae
OTU_1743	0	0	0	5	0	1	0	0	0	2	0	2	0	0	0	0	0	0	3	0	16	5	2	0	2	2	0	0	3	1	42	52	49	1	0	8	7	9	3	9	15	11	0	4	22	d__Bacteria; p__Armatimonadetes; c__Fimbriimonadia; o__Fimbriimonadales; f__Fimbriimonadaceae; g__Fimbriimonadaceae_ge; s__metagenome
OTU_1744	1	3	0	1	0	0	4	1	5	3	1	4	0	0	1	0	0	0	1	0	0	0	0	0	0	0	0	0	0	0	0	0	0	0	0	0	0	0	0	0	0	0	0	0	0	d__Bacteria; p__Actinobacteria; c__Actinobacteria; o__Frankiales; f__Sporichthyaceae; g__Sporichthya; s__metagenome
OTU_1745	1	0	0	1	0	2	0	1	2	3	1	1	1	1	0	0	0	0	0	0	0	0	0	0	0	0	0	0	0	0	0	0	0	0	0	0	0	0	0	0	0	0	0	0	0	d__Bacteria; p__Bacteroidetes; c__Bacteroidia; o__Chitinophagales; f__Chitinophagaceae; g__Flavisolibacter
OTU_1746	1	1	0	0	2	0	1	0	3	1	0	1	3	1	0	0	0	0	3	2	0	0	0	0	1	0	1	0	0	0	0	0	0	0	1	0	1	0	0	0	0	0	0	0	0	d__Bacteria; p__Chloroflexi; c__TK10; o__TK10_or; f__TK10_fa; g__TK10_ge
OTU_1747	0	0	3	0	0	0	0	0	4	2	0	0	0	0	0	0	0	0	0	0	0	0	0	0	0	0	0	0	0	0	0	0	0	0	0	0	0	0	0	0	0	0	0	0	0	d__Bacteria; p__Verrucomicrobia; c__Verrucomicrobiae; o__Pedosphaerales; f__Pedosphaeraceae; g__Pedosphaeraceae_ge
OTU_1748	0	0	0	0	0	0	0	0	0	0	0	0	0	0	0	0	4	2	0	1	0	4	0	1	22	12	5	0	0	4	0	0	0	0	0	0	0	0	0	0	0	0	0	0	0	Unclassified
OTU_1749	3	0	5	1	2	0	2	0	0	1	0	0	1	0	1	0	0	0	0	0	0	0	0	0	0	0	0	0	0	0	0	0	0	0	0	0	0	0	0	0	0	0	0	0	0	d__Bacteria; p__Gemmatimonadetes; c__Gemmatimonadetes; o__Gemmatimonadales; f__Gemmatimonadaceae
OTU_175	0	0	0	0	0	0	0	0	0	0	0	0	0	0	0	35	21	12	1	4	3	21	4	1	0	3	3	0	0	0	1242	1652	1123	183	55	99	165	155	301	180	576	252	303	138	176	d__Bacteria; p__Proteobacteria; c__Alphaproteobacteria; o__Rhizobiales; f__Beijerinckiaceae; g__1174_901_12; s__Rhizobiales_bacterium_8433D
OTU_1750	0	0	0	1	0	0	0	5	2	0	0	0	0	0	0	0	0	0	0	0	0	0	0	0	0	0	0	0	0	0	0	0	0	0	0	0	0	0	0	0	0	0	0	0	0	d__Bacteria; p__Bacteroidetes; c__Bacteroidia; o__Cytophagales; f__Cytophagaceae; g__uncultured; s__uncultured_bacterium
OTU_1751	1	0	0	1	4	0	1	5	1	3	1	3	0	2	0	0	0	0	0	0	0	0	0	0	0	0	0	0	0	0	0	0	0	0	0	0	0	0	0	0	0	0	0	0	0	d__Bacteria; p__Chloroflexi; c__Anaerolineae; o__Caldilineales; f__Caldilineaceae; g__uncultured
OTU_1752	0	1	2	0	1	0	2	1	7	5	1	1	2	1	2	0	0	0	1	0	0	0	0	0	0	0	1	0	0	0	0	0	0	0	1	0	0	0	0	0	0	0	0	0	0	d__Bacteria; p__Planctomycetes; c__Planctomycetacia; o__uncultured; f__uncultured_fa; g__uncultured_ge; s__uncultured_bacterium
OTU_1753	0	2	1	1	0	1	2	3	5	1	0	0	0	1	0	0	0	3	1	0	0	0	0	0	0	0	0	0	0	0	0	0	0	0	0	0	0	0	7	0	0	0	0	0	0	d__Bacteria; p__Bacteroidetes; c__Bacteroidia; o__Chitinophagales; f__Chitinophagaceae; g__uncultured
OTU_1754	2	1	0	1	0	0	2	1	5	2	0	0	1	0	2	0	0	0	1	0	0	0	0	0	0	0	0	0	0	0	0	0	0	0	0	0	0	0	0	0	0	0	0	0	0	d__Bacteria; p__Bacteroidetes; c__Bacteroidia; o__Flavobacteriales; f__NS9_marine_group; g__NS9_marine_group_ge; s__metagenome
OTU_1755	0	0	2	1	1	1	2	2	0	2	0	1	2	1	1	0	0	1	0	0	1	0	0	0	0	0	0	0	0	0	0	0	0	0	0	0	0	0	0	0	0	0	0	0	0	d__Bacteria; p__Gemmatimonadetes; c__Gemmatimonadetes; o__Gemmatimonadales; f__Gemmatimonadaceae
OTU_1756	0	0	0	0	0	0	0	0	0	0	0	0	0	0	0	0	0	0	0	0	0	0	0	0	0	0	0	0	0	0	17	6	2	4	9	0	5	10	7	6	6	6	0	1	0	d__Bacteria; p__Proteobacteria; c__Alphaproteobacteria; o__Rhizobiales; f__Beijerinckiaceae; g__1174_901_12
OTU_1757	0	4	0	0	1	2	0	2	2	0	1	2	3	0	0	0	0	0	0	1	0	0	0	0	0	0	0	0	0	0	0	0	0	0	0	0	0	0	0	0	0	0	0	0	0	d__Bacteria; p__Actinobacteria; c__MB_A2_108; o__MB_A2_108_or; f__MB_A2_108_fa; g__MB_A2_108_ge
OTU_1758	0	0	0	0	0	0	0	0	0	0	0	0	0	0	0	3	0	0	3	5	0	0	1	0	2	10	0	0	0	0	0	0	0	0	0	0	0	0	0	0	0	0	0	0	0	Unclassified
OTU_1759	1	1	2	2	1	1	2	3	5	2	2	1	0	2	4	0	0	0	0	0	0	0	0	0	2	0	0	0	0	0	0	0	0	1	0	0	0	0	0	1	0	0	0	0	0	d__Bacteria; p__Proteobacteria; c__Gammaproteobacteria; o__Betaproteobacteriales
OTU_176	3	2	0	1	0	1	23	4	9	3	0	3	3	2	4	47	13	126	65	18	20	3	0	24	1	3	16	5	0	7	1	11	18	25	12	772	27	7	0	136	61	8	2	1897	11	d__Bacteria; p__Proteobacteria; c__Gammaproteobacteria; o__Pseudomonadales; f__Pseudomonadaceae; g__Pseudomonas
OTU_1760	1	6	2	3	2	5	5	7	4	3	5	2	2	2	0	0	0	0	3	0	0	0	0	0	1	0	0	0	0	0	0	0	0	0	1	0	0	0	0	0	0	0	0	0	0	d__Bacteria; p__Gemmatimonadetes; c__BD2_11_terrestrial_group; o__BD2_11_terrestrial_group_or; f__BD2_11_terrestrial_group_fa; g__BD2_11_terrestrial_group_ge; s__metagenome
OTU_1761	0	0	2	0	0	0	0	0	1	1	1	0	2	0	1	0	0	1	2	0	0	0	1	0	0	0	0	0	0	0	0	0	0	1	10	1	0	0	0	1	1	0	0	1	0	d__Bacteria; p__Actinobacteria; c__Actinobacteria; o__Corynebacteriales; f__Nocardiaceae; g__Rhodococcus; s__Rhodococcus_corynebacterioides
OTU_1762	0	0	0	1	0	1	1	2	0	0	0	0	2	0	0	0	0	0	20	2	3	1	0	0	5	2	5	0	1	0	0	0	0	1	1	0	0	0	0	0	0	0	0	0	0	d__Bacteria; p__Actinobacteria; c__Thermoleophilia; o__Gaiellales; f__Gaiellaceae; g__Gaiella
OTU_1763	5	3	3	30	16	11	3	3	1	1	4	2	7	1	4	1	0	31	5	0	13	0	0	0	2	0	10	18	4	9	36	40	10	11	9	1	1	5	0	0	10	4	9	7	6	d__Bacteria; p__Actinobacteria; c__Actinobacteria; o__Kineosporiales; f__Kineosporiaceae; g__Kineosporia; s__Kineosporia_aurantiaca
OTU_1764	0	0	0	0	0	0	0	0	0	0	0	0	11	3	0	0	0	5	0	0	0	0	0	0	0	0	0	0	0	0	0	0	0	0	0	0	0	0	0	0	0	1	0	0	0	Unclassified
OTU_1765	1	1	2	1	1	0	0	1	2	0	1	0	1	0	0	0	0	0	0	0	0	0	0	0	0	0	0	0	0	0	0	0	0	0	0	0	0	0	0	0	0	0	0	0	0	d__Bacteria; p__Actinobacteria; c__MB_A2_108; o__MB_A2_108_or; f__MB_A2_108_fa; g__MB_A2_108_ge; s__uncultured_actinobacterium
OTU_1766	0	0	0	4	3	2	1	0	1	4	0	1	1	1	1	8	6	13	8	1	5	4	1	1	5	3	5	1	13	2	3	2	0	28	1	18	6	9	2	10	10	19	53	220	72	d__Bacteria; p__Proteobacteria; c__Alphaproteobacteria; o__Rhizobiales; f__Rhizobiaceae; g__Aureimonas
OTU_1767	0	1	3	0	2	4	1	1	2	3	2	1	4	1	3	0	0	0	0	0	0	0	0	0	0	0	0	0	0	0	0	0	0	0	1	0	0	0	0	0	0	0	0	0	0	d__Bacteria; p__Gemmatimonadetes; c__Gemmatimonadetes; o__Gemmatimonadales; f__Gemmatimonadaceae; g__uncultured
OTU_1768	8	3	2	2	0	0	0	1	8	0	1	2	2	0	1	0	0	0	0	0	0	0	0	0	0	0	0	0	0	0	0	0	0	0	0	0	0	0	0	0	0	0	0	0	0	d__Bacteria; p__Firmicutes; c__Negativicutes; o__Selenomonadales; f__Veillonellaceae; g__Dialister
OTU_1769	3	1	2	1	3	1	1	0	7	1	2	0	1	0	0	0	0	0	2	0	0	0	0	0	0	0	3	0	0	0	0	0	0	0	0	0	0	0	0	0	0	0	0	0	0	d__Bacteria; p__Planctomycetes; c__Phycisphaerae; o__Tepidisphaerales; f__WD2101_soil_group; g__WD2101_soil_group_ge
OTU_1771	370	264	57	75	102	35	49	19	54	64	85	40	37	97	28	2	0	0	0	0	2	0	0	0	0	0	0	0	0	0	0	0	0	0	0	0	0	0	0	0	0	0	0	0	0	d__Bacteria; p__Bacteroidetes; c__Bacteroidia; o__Cytophagales; f__Hymenobacteraceae; g__Adhaeribacter
OTU_1772	0	1	1	0	0	0	4	1	1	1	0	0	1	1	0	0	0	0	2	0	0	0	0	0	0	0	2	0	0	0	0	0	0	0	0	0	0	0	0	0	0	0	0	0	0	d__Bacteria; p__Planctomycetes; c__Planctomycetacia; o__Planctomycetales; f__Rubinisphaeraceae; g__SH_PL14; s__uncultured_bacterium
OTU_1774	0	1	1	0	0	0	2	0	1	0	0	0	0	1	0	1	0	0	27	14	8	0	0	0	6	5	4	0	0	0	0	0	0	1	2	0	0	0	0	0	2	0	0	0	0	d__Bacteria; p__Actinobacteria; c__Acidimicrobiia; o__Microtrichales; f__Ilumatobacteraceae; g__Ilumatobacter; s__uncultured_bacterium
OTU_1775	15	13	7	7	23	14	24	6	3	18	16	7	7	4	4	28	57	52	14	16	30	28	25	9	7	22	13	11	18	18	225	310	72	199	83	123	105	119	45	127	286	176	111	85	78	d__Bacteria; p__Proteobacteria; c__Alphaproteobacteria; o__Sphingomonadales; f__Sphingomonadaceae; g__Sphingomonas
OTU_1776	1	1	0	0	1	0	1	1	3	0	2	3	2	1	2	0	0	0	0	0	0	0	0	0	0	0	0	0	0	0	0	0	0	0	0	0	0	0	0	0	0	0	0	0	0	d__Bacteria
OTU_1777	0	1	1	2	0	0	1	3	1	4	0	0	1	0	2	8	5	5	2	14	1	2	0	1	9	11	4	0	0	0	1	11	1	0	12	3	0	0	0	21	1	6	0	1	0	d__Bacteria; p__Proteobacteria; c__Alphaproteobacteria; o__Sphingomonadales; f__Sphingomonadaceae; g__Novosphingobium
OTU_1778	19	19	25	17	24	17	36	39	59	32	22	15	28	16	18	2	0	16	3	0	0	0	3	0	0	1	0	0	0	0	1	16	1	3	2	5	98	12	43	7	38	13	4	1	2	d__Bacteria; p__Proteobacteria; c__Alphaproteobacteria; o__Sphingomonadales; f__Sphingomonadaceae; g__Sphingomonas
OTU_1779	0	0	0	0	0	0	0	0	0	0	0	0	0	0	0	0	0	0	0	0	0	0	0	0	0	0	0	0	0	0	6	17	2	4	4	1	0	2	2	0	15	17	1	0	4	d__Bacteria
OTU_178	44	44	65	7	54	19	5	7	0	21	22	3	31	27	13	0	0	0	1	0	6	4	2	4	0	0	9	1	0	8	0	0	0	0	0	0	0	0	0	0	0	0	0	1	0	d__Bacteria; p__Bacteroidetes; c__Bacteroidia; o__Cytophagales; f__Hymenobacteraceae; g__Hymenobacter
OTU_1781	0	0	0	0	0	0	0	0	0	0	0	0	0	0	0	0	0	0	0	0	0	0	0	0	0	0	0	0	0	0	15	45	0	0	0	0	0	0	0	0	0	5	0	0	0	d__Bacteria; p__Proteobacteria; c__Gammaproteobacteria; o__Betaproteobacteriales
OTU_1782	0	0	0	0	0	0	0	0	0	0	0	0	0	0	0	0	0	0	0	0	0	0	0	0	0	0	0	0	0	0	0	0	0	0	75	0	0	0	0	0	0	0	0	0	0	d__Bacteria; p__Firmicutes; c__Clostridia; o__Clostridiales; f__Clostridiaceae_1
OTU_1783	1	3	2	0	2	4	2	2	6	4	3	2	4	1	0	0	0	0	4	0	0	0	0	0	0	1	1	0	0	0	0	0	0	0	0	0	0	0	0	0	0	0	0	0	0	d__Bacteria; p__Acidobacteria; c__Holophagae; o__Subgroup_7; f__Subgroup_7_fa; g__Subgroup_7_ge; s__uncultured_Acidobacteria_bacterium
OTU_1784	0	0	2	1	0	0	0	0	0	1	3	0	1	0	0	0	0	0	2	0	0	0	0	0	0	0	0	0	0	0	0	0	0	0	0	0	0	0	0	0	0	0	0	0	0	d__Bacteria; p__Gemmatimonadetes; c__BD2_11_terrestrial_group; o__BD2_11_terrestrial_group_or; f__BD2_11_terrestrial_group_fa; g__BD2_11_terrestrial_group_ge
OTU_1785	9	6	2	2	1	1	7	4	5	3	1	6	1	2	7	0	0	0	3	0	0	0	0	0	0	0	1	0	0	0	0	0	0	0	0	0	0	0	0	0	0	0	0	0	0	d__Bacteria; p__Bacteroidetes; c__Bacteroidia; o__Cytophagales; f__Microscillaceae; g__uncultured
OTU_1787	1	2	2	8	1	0	4	4	6	3	2	0	9	4	0	0	3	6	7	3	3	4	0	0	2	0	1	0	0	1	0	0	0	2	0	5	0	1	1	0	0	0	0	0	3	d__Bacteria; p__Proteobacteria; c__Alphaproteobacteria; o__Caulobacterales; f__Caulobacteraceae; g__Brevundimonas
OTU_1788	0	0	0	0	0	0	0	0	0	0	0	0	0	0	0	11	1	2	0	0	0	0	0	0	0	1	0	0	0	0	11	5	36	3	8	5	20	25	0	9	4	2	1	35	0	d__Bacteria; p__Proteobacteria; c__Gammaproteobacteria; o__Betaproteobacteriales
OTU_1789	0	0	0	0	0	0	0	0	0	0	0	0	0	0	0	0	0	0	0	0	0	0	0	0	0	0	0	0	0	0	0	0	0	46	0	0	0	0	0	0	0	1	0	0	0	d__Bacteria; p__Firmicutes; c__Bacilli; o__Lactobacillales; f__Lactobacillaceae; g__Lactobacillus
OTU_179	0	0	0	0	0	0	0	0	0	0	0	0	0	0	0	0	0	0	0	0	1	0	0	0	0	0	0	0	0	0	79	2	46	304	162	642	42	539	3	753	23	5	0	12	119	Unclassified
OTU_1791	0	0	0	0	0	0	0	0	0	0	4	0	1	3	0	0	0	0	0	0	0	0	0	0	0	0	0	0	0	0	0	0	0	0	0	0	0	0	0	0	0	0	0	0	0	Unclassified
OTU_1793	0	1	2	0	0	1	0	4	3	1	0	0	0	0	0	0	0	0	1	0	0	0	0	0	0	0	0	0	0	0	0	0	0	0	0	0	0	0	0	0	0	0	0	0	0	d__Bacteria; p__Bacteroidetes; c__Ignavibacteria; o__OPB56; f__OPB56_fa; g__OPB56_ge
OTU_1795	0	0	1	0	1	1	0	0	0	0	1	1	0	1	0	0	0	0	0	0	0	0	0	0	0	0	0	0	0	0	0	0	0	0	0	0	0	0	0	0	0	0	0	0	0	d__Bacteria; p__Planctomycetes; c__Planctomycetacia; o__Planctomycetales; f__Rubinisphaeraceae; g__Planctomicrobium; s__uncultured_soil_bacterium
OTU_1796	3	1	1	0	1	0	1	0	0	1	1	1	0	3	0	0	0	1	0	2	1	1	0	0	0	2	0	0	0	0	0	0	0	0	0	0	0	0	0	0	0	0	0	0	0	d__Bacteria; p__Firmicutes; c__Clostridia; o__Clostridiales; f__Peptostreptococcaceae
OTU_1797	0	0	1	1	0	0	2	0	0	1	0	1	0	3	0	0	0	0	2	17	1	1	0	9	3	4	5	0	0	1	0	0	0	0	0	0	0	0	0	0	0	0	0	0	0	Unclassified
OTU_1798	0	1	3	1	2	2	3	0	5	0	0	1	0	1	0	0	0	0	0	0	0	0	0	0	0	0	0	0	0	0	0	0	0	0	0	0	0	0	0	0	0	0	0	0	0	d__Bacteria; p__Planctomycetes; c__Phycisphaerae; o__Phycisphaerales; f__Phycisphaeraceae; g__I_8; s__uncultured_bacterium
OTU_18	12	10	11	189	13	12	204	8593	454	9	17	11	24	10	9	21	16	39	31	17	25	13	1	9	13	6	4	12	12	7	59	4	1	48	18	383	20	62	4	43	23	16	12	10	16	d__Bacteria; p__Proteobacteria; c__Alphaproteobacteria; o__Rhizobiales; f__Rhizobiaceae; g__Allorhizobium_Neorhizobium_Pararhizobium_Rhizobium
OTU_180	88	14	8	57	68	21	15	36	9	178	131	178	17	19	8	0	0	0	0	0	0	0	0	0	0	2	0	0	0	0	0	0	0	0	0	0	0	0	0	0	0	0	0	0	0	d__Bacteria; p__Bacteroidetes; c__Bacteroidia; o__Cytophagales
OTU_1801	0	0	0	0	0	0	0	0	0	0	0	0	0	0	0	1	0	31	0	0	0	3	1	0	0	0	2	2	2	0	0	12	0	2	0	0	0	3	0	0	2	0	1	0	1	d__Bacteria; p__Actinobacteria; c__Actinobacteria; o__Propionibacteriales; f__Propionibacteriaceae
OTU_1804	0	0	0	0	1	0	0	0	0	0	0	0	2	5	1	0	0	0	0	0	0	0	0	0	3	0	0	0	0	0	0	0	0	1	0	0	1	0	0	0	1	1	0	0	0	Unclassified
OTU_1805	0	1	2	2	0	2	0	0	2	0	0	0	0	1	0	0	0	0	0	0	0	0	0	0	0	0	0	0	0	0	0	0	0	0	0	0	0	0	0	0	0	0	0	0	0	d__Bacteria; p__Planctomycetes; c__Pla4_lineage; o__Pla4_lineage_or; f__Pla4_lineage_fa; g__Pla4_lineage_ge
OTU_1807	0	1	1	1	3	1	2	2	3	1	0	0	1	0	0	0	0	0	0	0	0	0	0	0	1	0	0	0	0	0	0	0	0	0	0	0	0	0	0	0	0	0	0	0	0	d__Bacteria; p__Chloroflexi; c__Chloroflexia; o__Kallotenuales; f__AKIW781; g__AKIW781_ge
OTU_1808	0	1	1	2	0	1	6	3	3	9	3	4	6	0	7	1	0	0	2	1	0	0	0	0	0	0	0	0	0	0	1	0	0	0	0	0	0	0	0	0	1	0	0	0	0	d__Bacteria; p__Proteobacteria; c__Alphaproteobacteria; o__Caulobacterales; f__Hyphomonadaceae; g__Hirschia
OTU_1809	16	16	21	10	10	12	41	25	59	30	21	39	21	15	7	0	1	1	35	4	3	0	0	0	2	0	5	0	1	2	3	0	0	1	6	0	3	3	1	6	1	0	2	1	3	d__Bacteria; p__Proteobacteria; c__Gammaproteobacteria; o__Betaproteobacteriales; f__Burkholderiaceae
OTU_181	210	289	235	157	211	412	576	24	37	1403	271	65	240	246	344	92	135	144	176	103	56	173	56	93	29	27	45	145	133	100	173	38	54	30	19	18	30	22	5	24	42	45	23	36	23	d__Bacteria; p__Bacteroidetes; c__Bacteroidia; o__Cytophagales; f__Hymenobacteraceae; g__Hymenobacter; s__uncultured_bacterium
OTU_1810	0	0	0	0	0	1	2	2	5	1	2	1	0	1	0	0	0	0	2	1	0	0	0	0	1	0	1	0	0	0	0	0	0	0	0	0	0	0	0	0	0	0	0	0	0	d__Bacteria; p__Proteobacteria; c__Alphaproteobacteria; o__Rhizobiales; f__Xanthobacteraceae; g__uncultured
OTU_1811	0	0	0	0	0	0	0	0	0	0	0	0	0	0	0	0	0	0	0	0	0	0	1	0	0	0	0	0	0	0	11	55	0	1	0	0	0	1	3	0	5	3	0	1	4	Unclassified
OTU_1814	2	1	0	1	1	0	0	3	5	1	2	0	2	2	1	0	0	0	0	0	0	0	0	0	0	0	0	0	0	0	0	0	0	0	0	0	0	0	0	0	0	0	0	0	0	d__Bacteria; p__Actinobacteria; c__Acidimicrobiia; o__IMCC26256; f__IMCC26256_fa; g__IMCC26256_ge
OTU_1815	0	1	0	0	0	0	0	1	5	2	0	0	0	0	1	0	0	0	0	0	0	0	0	0	1	0	0	0	0	0	0	0	0	0	0	0	0	0	0	0	0	0	0	0	0	d__Bacteria; p__Bacteroidetes; c__Bacteroidia; o__Chitinophagales; f__Chitinophagaceae; g__Pseudoflavitalea; s__uncultured_bacterium
OTU_1816	0	3	1	0	0	0	0	0	2	0	3	0	3	2	0	0	0	0	1	2	0	0	0	0	1	1	1	0	0	0	0	0	0	0	0	0	0	1	0	3	0	0	0	0	0	d__Bacteria; p__Chloroflexi; c__Anaerolineae; o__Caldilineales; f__Caldilineaceae; g__uncultured
OTU_1817	2	1	0	0	0	1	3	1	3	3	1	0	1	0	0	0	0	0	0	0	0	0	0	0	0	0	0	0	0	0	0	0	0	0	0	0	0	0	0	0	0	0	0	0	0	d__Bacteria; p__Proteobacteria; c__Alphaproteobacteria; o__Reyranellales; f__Reyranellaceae; g__uncultured
OTU_1818	0	0	0	0	0	0	1	0	0	0	0	0	0	0	0	0	0	0	1	0	0	0	0	0	0	0	1	0	0	0	0	2	0	0	0	0	0	0	0	0	35	0	0	3	3	d__Bacteria; p__Bacteroidetes; c__Bacteroidia; o__Flavobacteriales; f__Flavobacteriaceae; g__Flavobacterium
OTU_182	18	32	42	14	23	44	60	45	117	44	21	14	26	23	26	1	0	0	46	1	2	0	0	1	3	2	4	0	0	0	1	0	0	0	7	0	0	0	0	0	1	0	0	0	0	d__Bacteria; p__Proteobacteria; c__Gammaproteobacteria; o__Betaproteobacteriales; f__Nitrosomonadaceae; g__MND1
OTU_1820	0	0	1	0	0	0	10	0	1	0	1	0	0	1	0	0	0	0	4	1	2	1	1	0	0	0	1	0	0	0	0	0	0	0	0	0	0	0	0	0	0	0	0	0	0	d__Bacteria; p__Proteobacteria; c__Alphaproteobacteria; o__Rhodospirillales; f__Rhodopirillaceae; g__Defluviicoccus; s__uncultured_bacterium
OTU_1821	0	0	0	0	0	0	0	0	0	0	0	0	0	0	0	0	0	0	0	1	2	0	0	0	0	0	0	0	0	0	3	2	1	8	1	0	0	0	0	3	22	3	0	0	0	d__Bacteria; p__Proteobacteria
OTU_1822	0	0	0	0	0	0	0	0	0	0	0	0	0	0	0	0	0	0	0	0	0	0	0	0	0	0	0	0	0	0	0	0	0	0	0	0	99	0	0	0	0	0	0	0	0	Unclassified
OTU_1823	0	0	0	0	1	0	2	0	0	2	0	0	2	0	0	0	0	0	2	1	0	0	0	0	0	0	0	0	0	0	0	0	0	0	0	0	0	0	0	0	0	0	0	0	0	d__Bacteria; p__Planctomycetes; c__Planctomycetacia; o__Pirellulales; f__Pirellulaceae; g__Pirellula
OTU_1824	0	0	0	3	1	1	0	0	1	0	0	0	0	0	0	0	0	0	0	0	0	0	0	0	0	0	0	0	0	0	0	0	0	0	0	0	0	0	0	0	0	0	0	0	0	Unclassified
OTU_1825	0	0	0	0	0	0	0	0	0	0	0	0	0	0	0	0	0	0	0	0	0	0	0	0	0	0	0	0	0	0	0	2	0	0	0	0	6	0	1	0	2	3	5	2	2	d__Bacteria; p__Bacteroidetes; c__Bacteroidia; o__Sphingobacteriales; f__Sphingobacteriaceae; g__Mucilaginibacter; s__Mucilaginibacter_sp._HME8677
OTU_1826	0	0	0	0	0	0	2	2	1	0	0	0	0	0	0	0	0	0	0	0	0	0	0	0	0	0	0	0	0	0	0	0	0	0	0	0	0	0	0	0	0	0	0	0	0	d__Bacteria; p__Firmicutes; c__Clostridia; o__Clostridiales; f__Lachnospiraceae
OTU_1827	0	1	0	0	0	0	2	4	5	0	0	1	0	0	0	1	0	0	0	1	0	0	0	0	0	0	0	0	0	0	0	0	0	0	0	0	0	0	0	0	0	0	0	0	0	d__Bacteria; p__Actinobacteria; c__Thermoleophilia; o__Solirubrobacterales; f__Solirubrobacteraceae; g__Conexibacter
OTU_1828	0	7	1	0	4	1	1	0	4	0	1	0	2	1	0	0	0	0	0	0	1	0	0	0	0	0	0	0	0	0	0	0	0	1	0	0	0	0	0	0	0	0	0	0	0	d__Bacteria; p__Actinobacteria; c__Acidimicrobiia; o__IMCC26256; f__IMCC26256_fa; g__IMCC26256_ge; s__uncultured_bacterium
OTU_183	8	18	5	34	82	23	15	139	16	39	50	55	7	7	2	0	0	20	6	1	7	12	11	0	13	1	6	0	4	2	1	2	0	8	0	0	14	17	2	0	0	2	0	0	2	d__Bacteria; p__Bacteroidetes; c__Bacteroidia; o__Chitinophagales; f__Chitinophagaceae; g__Segetibacter
OTU_1830	4	4	3	4	4	2	11	6	5	6	4	9	5	4	2	0	0	0	3	0	9	1	0	0	3	3	5	0	0	0	4	0	0	1	0	0	0	0	0	0	2	1	1	0	1	d__Bacteria; p__Actinobacteria; c__Actinobacteria; o__Micromonosporales; f__Micromonosporaceae; g__Dactylosporangium
OTU_1831	1	2	3	1	1	2	3	2	2	1	0	0	1	0	0	0	0	0	0	0	0	0	0	0	0	0	0	0	0	0	0	0	0	0	0	0	0	0	0	0	0	0	0	0	0	d__Bacteria; p__Gemmatimonadetes; c__Longimicrobia; o__Longimicrobiales; f__Longimicrobiaceae; g__Longimicrobiaceae_ge; s__uncultured_bacterium
OTU_1832	0	1	0	1	0	0	0	1	0	3	0	1	0	0	0	0	0	0	0	0	0	0	0	0	0	0	0	0	0	0	0	0	0	0	0	0	0	0	0	0	0	0	0	0	0	d__Bacteria
OTU_1833	1	0	0	1	0	0	0	2	1	0	1	1	0	0	0	0	0	0	0	0	0	0	0	0	0	0	0	0	0	0	0	0	0	0	0	0	0	0	0	0	0	0	0	0	0	d__Bacteria; p__Chloroflexi; c__Chloroflexia; o__Chloroflexales; f__Chloroflexaceae
OTU_1834	0	2	0	0	1	0	0	0	0	0	0	0	1	6	0	0	0	0	0	0	0	0	0	11	1	0	0	0	0	0	0	0	0	0	0	0	0	0	0	0	0	0	0	0	0	Unclassified
OTU_1835	0	0	0	0	1	0	0	2	0	0	0	0	0	0	0	0	0	10	0	1	8	3	0	0	0	2	2	0	0	2	0	12	0	1	0	0	2	0	15	1	4	0	1	4	0	d__Bacteria; p__Bacteroidetes; c__Bacteroidia; o__Cytophagales
OTU_1837	1	2	0	0	1	0	2	2	0	0	0	0	0	0	0	0	0	0	2	0	0	0	0	0	0	0	0	0	0	0	0	0	0	0	0	0	0	0	0	0	0	0	0	0	0	d__Bacteria; p__Proteobacteria; c__Deltaproteobacteria; o__Myxococcales; f__Sandaracinaceae; g__uncultured
OTU_1839	1	0	2	1	0	0	0	4	3	4	3	0	0	1	0	0	0	2	4	2	6	0	2	0	0	0	0	0	1	0	3	2	0	2	1	0	0	0	0	0	4	1	0	1	0	d__Bacteria; p__Proteobacteria; c__Alphaproteobacteria; o__Rhizobiales; f__Rhizobiaceae; g__Allorhizobium_Neorhizobium_Pararhizobium_Rhizobium
OTU_184	57	127	21	50	120	24	42	56	18	53	65	57	27	24	11	0	0	1	3	3	18	3	5	0	11	1	14	1	0	1	0	0	0	0	0	2	0	0	0	1	2	0	1	0	0	d__Bacteria; p__Proteobacteria; c__Alphaproteobacteria; o__Rhodobacterales; f__Rhodobacteraceae; g__Rubellimicrobium; s__uncultured_bacterium
OTU_1840	1	1	0	1	0	0	1	0	2	1	0	1	2	1	0	0	0	0	0	0	0	0	0	0	0	0	0	0	0	0	0	0	0	0	0	0	0	0	0	0	0	0	0	0	0	d__Bacteria; p__Actinobacteria; c__0319_7L14; o__0319_7L14_or; f__0319_7L14_fa; g__0319_7L14_ge; s__uncultured_actinobacterium
OTU_1841	1	1	0	0	0	0	1	1	0	0	0	3	1	1	1	0	0	0	0	0	1	0	0	0	0	0	0	0	0	0	0	0	0	0	2	0	0	0	0	0	0	0	0	0	0	d__Bacteria; p__Proteobacteria; c__Deltaproteobacteria; o__Myxococcales; f__Polyangiaceae; g__Sorangium
OTU_1842	0	0	0	1	0	0	0	1	3	3	0	0	3	0	2	0	0	0	0	0	0	0	0	0	0	0	1	0	0	0	0	0	0	0	0	0	0	0	0	0	0	1	0	0	0	d__Bacteria; p__Bacteroidetes; c__Bacteroidia; o__Cytophagales; f__Microscillaceae; g__Ohtaekwangia; s__uncultured_bacterium
OTU_1843	0	0	2	0	0	6	2	0	1	1	0	0	0	0	0	0	0	0	2	0	0	0	0	0	0	0	1	0	0	0	0	0	0	0	0	0	0	0	0	0	0	0	0	0	0	d__Bacteria; p__Proteobacteria; c__Deltaproteobacteria; o__NB1_j; f__NB1_j_fa; g__NB1_j_ge
OTU_1844	3	0	1	1	1	0	1	0	1	1	2	0	3	2	3	0	0	8	5	1	1	2	0	1	0	1	1	1	2861	1	0	0	0	3	0	4	0	1	0	1	1	0	1	0	1	d__Bacteria; p__Proteobacteria; c__Alphaproteobacteria; o__Rhizobiales; f__Rhizobiaceae; g__Allorhizobium_Neorhizobium_Pararhizobium_Rhizobium; s__Rhizobium_cellulosilyticum
OTU_1845	0	0	0	0	0	0	0	0	0	0	0	0	0	0	0	0	0	1	0	0	0	0	0	0	0	1	0	1	0	0	12	1	24	4	0	0	1	2	2	0	0	8	0	0	0	Unclassified
OTU_1846	0	0	1	2	0	0	1	0	1	0	1	0	0	1	0	0	1	0	0	0	0	0	0	0	0	0	0	0	0	0	0	0	0	0	0	0	0	0	0	0	0	0	0	0	0	d__Bacteria; p__Actinobacteria; c__Actinobacteria; o__Corynebacteriales; f__Corynebacteriaceae; g__Corynebacterium_1; s__Corynebacterium_maris_DSM_45190
OTU_1847	0	0	1	0	2	2	2	2	4	0	1	1	0	0	0	0	0	0	0	0	0	0	0	0	1	0	0	0	0	0	1	0	0	0	1	0	0	0	0	0	0	0	0	0	0	d__Bacteria; p__Acidobacteria; c__Subgroup_17; o__Subgroup_17_or; f__Subgroup_17_fa; g__Subgroup_17_ge
OTU_1848	1	1	1	3	1	1	2	1	1	0	0	0	0	2	5	0	1	3	0	0	2	0	0	0	1	2	0	0	0	0	0	0	0	0	0	0	0	0	0	0	0	0	0	0	0	d__Bacteria; p__Proteobacteria; c__Deltaproteobacteria; o__Myxococcales; f__Polyangiaceae; g__Pajaroellobacter; s__metagenome
OTU_1849	0	0	0	0	1	0	1	2	2	0	0	0	0	0	0	0	0	0	7	2	1	0	0	0	0	0	1	0	0	0	0	0	0	1	0	4	3	0	0	0	0	0	0	0	0	d__Bacteria; p__Verrucomicrobia; c__Verrucomicrobiae; o__Verrucomicrobiales; f__Rubritaleaceae; g__Luteolibacter
OTU_185	0	0	0	0	0	0	2	0	0	0	0	0	0	0	0	77	69	50	37	174	163	287	372	222	92	333	164	124	184	149	57	85	56	8	8	5	90	34	8	18	25	25	17	51	30	d__Bacteria; p__Deinococcus_Thermus; c__Deinococci; o__Deinococcales; f__Deinococcaceae; g__Deinococcus; s__uncultured_bacterium
OTU_1850	0	1	0	0	0	0	2	0	1	2	1	0	1	0	1	0	0	0	0	0	0	0	0	0	0	0	0	0	0	0	0	0	0	0	0	0	0	0	0	0	0	0	0	0	0	d__Bacteria; p__Planctomycetes; c__Phycisphaerae; o__Tepidisphaerales; f__WD2101_soil_group; g__WD2101_soil_group_ge
OTU_1851	0	0	0	4	1	0	1	1	0	0	0	1	0	0	0	0	0	4	0	0	16	0	0	0	0	0	0	0	0	0	0	0	0	0	0	0	0	0	0	0	0	0	2	0	1	d__Bacteria; p__Verrucomicrobia; c__Verrucomicrobiae; o__Chthoniobacterales; f__Chthoniobacteraceae; g__Chthoniobacter; s__uncultured_bacterium
OTU_1852	2	7	11	2	3	5	6	8	21	16	1	0	9	4	2	0	0	0	39	6	4	1	0	0	3	3	16	0	0	0	0	0	0	0	1	0	0	0	0	0	0	0	0	0	0	d__Bacteria; p__Acidobacteria; c__Subgroup_6; o__Subgroup_6_or; f__Subgroup_6_fa; g__Subgroup_6_ge
OTU_1853	0	1	2	2	0	0	0	1	4	0	1	3	1	0	0	0	0	0	13	0	0	0	0	0	0	0	1	0	1	0	0	0	0	0	0	0	0	0	0	0	1	2	0	0	0	d__Bacteria; p__Actinobacteria; c__Actinobacteria; o__Pseudonocardiales; f__Pseudonocardiaceae; g__Pseudonocardia
OTU_1856	5	0	0	0	0	0	0	0	0	0	0	0	0	0	0	0	0	0	0	0	0	0	0	0	0	0	0	0	0	0	0	0	0	0	0	0	0	0	0	0	0	0	0	0	0	d__Bacteria; p__Bacteroidetes; c__Bacteroidia; o__Sphingobacteriales; f__Sphingobacteriaceae; g__Sphingobacterium
OTU_1857	0	0	1	1	0	0	1	0	0	1	0	0	0	0	0	1	0	0	0	1	2	0	0	0	0	1	2	0	0	0	0	0	0	0	0	1	0	0	0	0	0	0	0	0	0	d__Bacteria; p__Proteobacteria; c__Alphaproteobacteria; o__Sphingomonadales; f__Sphingomonadaceae; g__Sphingorhabdus; s__uncultured_bacterium
OTU_1858	2	3	2	1	0	0	1	7	4	2	1	1	0	0	1	0	0	0	0	0	1	0	0	0	1	0	1	0	0	0	0	0	0	0	0	0	0	0	0	0	0	0	0	0	0	d__Bacteria; p__Gemmatimonadetes; c__Longimicrobia; o__Longimicrobiales; f__Longimicrobiaceae; g__Longimicrobiaceae_ge; s__metagenome
OTU_1859	0	4	9	0	1	5	5	3	0	0	0	0	0	0	0	0	0	0	0	0	0	0	0	0	0	0	0	0	0	0	0	0	0	0	0	0	0	0	0	0	0	0	0	0	0	d__Bacteria; p__Bacteroidetes; c__Bacteroidia; o__Bacteroidales; f__Bacteroidaceae; g__Bacteroides; s__Bacteroides_caccae
OTU_186	11	13	10	31	9	13	5	4	2	42	11	5	244	45	21	0	1	6	0	3	2	0	1	1	2	0	0	1	0	0	1	1	0	1	0	0	0	0	1	0	1	2	0	1	0	d__Bacteria; p__Actinobacteria; c__Actinobacteria
OTU_1861	1	4	2	1	2	2	5	3	4	0	0	0	0	0	0	0	0	0	0	0	0	0	0	0	0	0	0	0	0	0	0	0	0	0	0	0	0	0	0	0	0	0	0	0	0	d__Bacteria; p__Firmicutes; c__Clostridia; o__Clostridiales; f__Lachnospiraceae; g__Lachnoclostridium; s__uncultured_Firmicutes_bacterium
OTU_1862	0	0	0	0	0	0	0	0	0	2	0	2	0	1	0	0	0	0	0	0	0	0	0	0	0	0	1	0	0	0	0	0	0	0	0	0	0	0	0	0	0	0	0	0	0	d__Bacteria; p__Planctomycetes; c__Planctomycetacia; o__Pirellulales; f__Pirellulaceae; g__Rhodopirellula; s__Pirellula_sp.
OTU_1863	0	0	0	0	0	1	0	0	0	0	0	0	0	0	0	2	1	1	2	8	4	0	0	5	16	0	3	0	2	0	2	7	1	11	6	12	5	2	1	9	17	3	0	1	1	d__Bacteria; p__Proteobacteria; c__Alphaproteobacteria
OTU_1864	0	0	1	0	0	4	1	1	2	2	0	1	0	1	0	0	0	0	0	0	0	0	0	0	0	0	0	0	0	0	0	0	0	0	0	0	0	0	0	0	0	0	0	0	0	d__Bacteria; p__Bacteroidetes; c__Bacteroidia; o__Chitinophagales; f__Chitinophagaceae
OTU_1866	0	0	0	1	2	1	2	2	1	1	1	0	0	1	0	0	0	0	0	0	0	0	0	0	0	0	0	0	0	0	0	0	0	0	0	0	0	0	0	0	1	0	0	0	0	d__Bacteria; p__Planctomycetes; c__Phycisphaerae; o__Tepidisphaerales; f__WD2101_soil_group; g__WD2101_soil_group_ge; s__uncultured_bacterium
OTU_1867	1	2	1	0	0	0	2	0	2	1	0	2	0	0	0	0	0	0	0	0	0	0	0	0	0	0	0	0	0	0	0	0	0	0	0	0	0	0	0	0	0	0	0	0	0	d__Bacteria; p__Actinobacteria; c__Actinobacteria; o__Glycomycetales; f__Glycomycetaceae; g__Glycomyces
OTU_1868	0	2	1	4	2	0	0	4	1	0	0	0	0	1	0	1	0	0	0	0	0	0	0	0	0	0	0	0	0	0	0	0	0	0	0	0	0	0	0	0	0	0	0	0	0	d__Bacteria; p__Proteobacteria; c__Alphaproteobacteria; o__Caulobacterales; f__Caulobacteraceae; g__PMMR1; s__uncultured_endolithic_bacterium
OTU_1869	2	5	0	1	7	2	0	4	2	7	6	0	4	0	0	0	0	1	0	2	0	0	0	0	0	0	0	0	0	0	0	0	0	2	0	0	1	0	0	0	1	0	0	0	0	d__Bacteria; p__Planctomycetes; c__Phycisphaerae; o__Tepidisphaerales; f__WD2101_soil_group; g__WD2101_soil_group_ge
OTU_187	4	307	7	0	5	1	0	0	0	2	3	2	0	1	0	0	0	0	0	0	0	0	0	0	0	0	0	0	0	0	0	0	0	0	0	0	0	0	0	0	0	0	0	0	0	d__Bacteria; p__Proteobacteria; c__Gammaproteobacteria; o__Cardiobacteriales; f__Wohlfahrtiimonadaceae; g__Ignatzschineria; s__uncultured_bacterium
OTU_1870	0	0	0	0	0	0	0	0	0	0	0	0	0	0	0	2	2	0	0	0	11	0	0	15	0	0	0	0	0	0	0	0	0	0	0	0	0	0	0	0	0	0	0	6	0	Unclassified
OTU_1871	2	0	6	1	0	7	0	1	0	0	0	0	0	0	0	0	0	0	0	0	0	0	0	0	0	0	0	0	0	0	0	0	0	0	0	0	0	0	0	0	0	0	0	0	0	d__Bacteria; p__Firmicutes; c__Clostridia; o__Clostridiales; f__Ruminococcaceae; g__Subdoligranulum
OTU_1873	0	1	1	0	0	2	11	2	2	4	1	4	2	2	3	0	0	0	16	0	0	1	0	0	1	0	2	0	0	0	0	0	0	0	0	0	0	0	0	0	0	0	0	0	0	d__Bacteria; p__Proteobacteria; c__Gammaproteobacteria; o__Betaproteobacteriales; f__Nitrosomonadaceae; g__Ellin6067
OTU_1875	1	6	2	0	1	0	1	1	1	2	1	3	0	0	5	0	0	0	3	4	0	0	0	0	0	0	0	0	1	1	2	2	0	0	0	0	1	0	0	0	0	0	1	0	0	d__Bacteria; p__Actinobacteria; c__Actinobacteria; o__Propionibacteriales; f__Nocardioidaceae; g__Nocardioides
OTU_1876	0	0	0	0	0	0	2	3	7	4	1	1	0	1	3	0	0	0	4	0	0	0	0	0	0	0	0	0	0	0	0	0	0	0	0	0	0	0	0	0	0	0	0	0	0	d__Bacteria; p__Gemmatimonadetes; c__Gemmatimonadetes; o__Gemmatimonadales; f__Gemmatimonadaceae; g__Gemmatimonas
OTU_1878	0	0	0	4	1	0	0	0	1	0	0	0	0	0	0	0	0	0	0	0	0	0	0	0	0	0	0	0	0	0	0	0	0	3	0	1	8	5	1	1	1	1	1	3	2	Unclassified
OTU_1879	2	2	1	0	0	0	0	1	7	1	1	1	4	0	0	0	0	0	14	0	0	0	0	1	2	1	3	0	0	0	0	0	0	0	1	0	0	0	0	0	2	0	0	1	0	d__Bacteria; p__Actinobacteria; c__Acidimicrobiia; o__Microtrichales; f__uncultured; g__uncultured_ge
OTU_188	4	0	2	2	1	0	24	0	2	1	0	0	2	2	0	165	119	21	8	90	190	236	82	206	84	550	147	299	365	64	1	8	1	1	0	2	3	0	0	0	0	0	0	1	1	d__Bacteria; p__Bacteroidetes; c__Bacteroidia; o__Cytophagales; f__Spirosomaceae
OTU_1880	0	0	0	0	0	0	1	0	0	2	1	0	1	2	0	0	0	0	0	0	0	0	0	0	0	0	0	0	0	0	0	0	0	0	0	0	0	0	0	0	0	0	0	0	0	Unclassified
OTU_1882	0	1	0	0	0	0	1	0	4	1	2	3	2	0	1	0	0	0	12	0	0	0	0	0	2	1	1	0	0	0	0	0	0	0	0	0	0	0	0	0	0	0	0	0	0	d__Bacteria; p__Proteobacteria; c__Deltaproteobacteria; o__Myxococcales; f__Haliangiaceae; g__Haliangium
OTU_1883	0	0	0	10	0	0	0	1	0	0	0	1	0	0	0	0	0	0	2	0	0	0	0	0	1	0	0	0	0	0	0	0	0	0	0	0	0	0	0	0	0	0	0	0	0	d__Bacteria; p__Proteobacteria; c__Deltaproteobacteria; o__Myxococcales; f__Sandaracinaceae; g__uncultured
OTU_1884	0	0	0	0	0	0	0	3	1	1	0	0	1	1	0	0	0	0	0	0	0	0	0	1	0	0	0	0	0	0	0	0	0	0	0	0	0	0	0	0	0	0	0	0	0	d__Bacteria; p__Armatimonadetes; c__Fimbriimonadia; o__Fimbriimonadales; f__Fimbriimonadaceae; g__Fimbriimonadaceae_ge
OTU_1885	1	0	0	2	0	0	0	0	0	0	6	0	0	0	0	0	1	0	0	0	0	0	0	0	0	1	1	0	0	0	0	2	0	0	0	0	2	3	1	0	0	1	2	1	2	Unclassified
OTU_1886	0	2	1	0	0	1	1	1	1	3	0	0	0	0	0	0	0	0	1	0	0	0	0	0	0	0	0	0	0	0	0	0	0	0	0	0	0	0	0	0	0	0	0	0	0	d__Bacteria; p__Planctomycetes; c__OM190; o__OM190_or; f__OM190_fa; g__OM190_ge; s__metagenome
OTU_1887	0	0	0	1	1	0	1	0	1	0	0	0	0	0	1	0	0	0	0	0	0	0	0	0	0	0	0	0	0	0	0	0	0	0	0	0	0	0	0	0	0	0	0	0	0	d__Bacteria; p__Acidobacteria; c__Acidobacteriia; o__Solibacterales; f__Solibacteraceae_Subgroup_3; g__Bryobacter
OTU_1889	0	1	0	0	0	0	2	2	2	4	2	3	3	0	0	0	0	0	4	1	0	0	0	0	0	0	0	0	0	0	0	0	0	0	0	0	0	0	0	0	0	0	0	0	0	d__Bacteria; p__Verrucomicrobia; c__Verrucomicrobiae; o__Opitutales; f__Opitutaceae; g__Lacunisphaera; s__uncultured_Verrucomicrobia_bacterium
OTU_189	16	10	3	121	17	19	6	240	27	24	24	40	13	9	5	3	0	24	1	1	6	25	19	2	2	16	1	3	5	22	0	0	0	1	1	0	5	9	1	0	6	0	1	1	2	d__Bacteria; p__Bacteroidetes; c__Bacteroidia; o__Chitinophagales; f__Chitinophagaceae; g__Flavisolibacter
OTU_1890	0	0	0	0	0	0	0	0	0	0	0	0	0	0	0	0	0	0	0	0	0	0	0	0	0	0	0	0	0	0	10	2	11	1	9	1	1	0	0	0	1	6	1	7	20	d__Bacteria; p__Proteobacteria; c__Alphaproteobacteria; o__Caedibacterales; f__Caedibacteraceae; g__Caedibacter
OTU_1891	0	0	0	0	0	0	0	0	0	0	0	0	0	0	0	0	4	0	6	0	3	5	0	2	18	5	0	0	0	0	0	0	0	0	0	0	0	0	0	0	0	0	0	0	0	Unclassified
OTU_1893	0	0	0	0	0	0	0	0	0	0	0	0	0	0	0	0	0	0	0	0	0	0	0	0	0	0	0	0	0	0	0	0	32	0	0	0	0	0	0	0	0	0	0	0	0	d__Bacteria; p__Proteobacteria; c__Alphaproteobacteria; o__Acetobacterales; f__Acetobacteraceae
OTU_1894	0	0	0	0	0	0	0	0	0	0	0	0	0	0	0	0	0	15	0	0	3	0	0	0	0	0	0	0	0	0	0	0	0	2	0	0	2	1	0	1	3	0	12	0	4	d__Bacteria; p__Acidobacteria; c__Blastocatellia_Subgroup_4; o__Blastocatellales; f__Blastocatellaceae; g__Blastocatella; s__uncultured_Acidobacteria_bacterium
OTU_1895	0	1	1	0	1	0	2	1	3	1	0	0	1	2	0	0	0	0	0	0	1	0	0	0	0	0	0	0	0	0	0	0	0	0	0	0	0	0	0	0	1	0	0	0	0	d__Bacteria; p__Actinobacteria; c__Acidimicrobiia; o__Microtrichales; f__Iamiaceae; g__Iamia; s__uncultured_bacterium
OTU_1896	0	0	0	0	0	0	0	0	0	0	0	0	0	0	0	0	0	0	0	2	0	0	1	33	2	0	0	0	0	0	0	0	0	0	0	0	0	0	0	0	0	0	0	0	0	Unclassified
OTU_1897	1	0	0	0	0	0	0	0	0	0	0	0	3	0	0	0	0	0	0	1	1	0	0	0	0	0	0	0	0	0	0	0	0	0	0	0	0	0	0	0	0	0	0	0	0	Unclassified
OTU_1898	2	2	1	24	4	0	4	4	6	5	1	2	8	1	3	0	0	5	29	0	2	0	0	0	2	1	1	0	1	0	0	2	0	4	0	0	1	1	0	0	3	0	0	0	2	d__Bacteria; p__Proteobacteria; c__Alphaproteobacteria; o__Caulobacterales; f__Caulobacteraceae; g__Caulobacter; s__Caulobacter_sp.
OTU_1899	0	0	0	0	0	0	0	0	0	0	0	0	0	0	0	0	0	0	0	0	0	0	0	0	0	0	0	0	0	0	0	0	0	0	0	0	8	2	1	3	9	0	45	6	13	d__Bacteria; p__Bacteroidetes; c__Bacteroidia; o__Cytophagales; f__Spirosomaceae; g__Spirosoma
OTU_19	118	545	201	117	317	387	2655	87	118	1661	1247	142	1450	1236	557	176	80	27	315	443	220	173	290	169	428	94	48	60	10	178	116	27	14	57	66	70	66	68	3	65	26	35	45	28	15	d__Bacteria; p__Proteobacteria; c__Gammaproteobacteria; o__Betaproteobacteriales; f__Burkholderiaceae; g__Massilia
OTU_190	10	36	4	4	7	15	42	8	0	15	6	8	28	70	21	32	9	16	0	1	21	8	32	4	5	5	11	4	0	22	7	15	0	2	0	14	3	2	0	7	16	5	1	20	11	d__Bacteria; p__Proteobacteria; c__Deltaproteobacteria; o__Bdellovibrionales; f__Bdellovibrionaceae; g__Bdellovibrio
OTU_1900	3	1	3	2	2	4	18	10	17	10	4	11	10	0	10	0	0	0	86	7	4	1	0	0	10	3	8	0	0	1	0	0	0	0	1	0	0	0	0	1	0	1	0	1	0	d__Bacteria; p__Proteobacteria; c__Gammaproteobacteria; o__Gammaproteobacteria_Incertae_Sedis; f__Unknown_Family; g__Acidibacter
OTU_1901	0	0	0	0	0	0	0	0	0	0	0	0	0	0	0	0	0	0	0	0	0	0	0	0	0	0	0	0	0	0	0	0	0	5	2	37	1	0	0	8	5	0	0	2	0	Unclassified
OTU_1902	52	66	59	47	76	47	82	78	95	124	64	81	68	26	25	1	0	1	7	0	7	0	0	0	2	1	0	0	2	1	0	0	0	0	1	0	1	0	0	0	0	0	0	0	0	d__Bacteria; p__Actinobacteria; c__Actinobacteria; o__Frankiales; f__Geodermatophilaceae; g__Blastococcus
OTU_1903	0	2	3	1	2	0	3	1	1	2	0	1	1	1	0	0	0	0	4	0	0	1	0	0	2	0	2	0	0	0	1	0	0	0	1	1	0	1	0	0	0	0	0	0	0	d__Bacteria; p__Proteobacteria; c__Gammaproteobacteria; o__Betaproteobacteriales; f__Nitrosomonadaceae; g__mle1_7; s__uncultured_beta_proteobacterium
OTU_1904	0	1	1	4	4	0	0	4	2	4	1	0	1	1	0	0	0	0	1	0	1	0	1	0	0	1	4	0	0	0	0	0	0	8	0	0	0	0	0	0	0	0	0	2	0	d__Bacteria; p__Planctomycetes; c__Phycisphaerae; o__Tepidisphaerales; f__Tepidisphaeraceae; g__Tepidisphaeraceae_ge; s__uncultured_bacterium
OTU_1905	0	0	0	0	0	0	0	0	0	0	0	0	0	0	0	0	0	2	0	0	14	1	0	0	0	0	0	0	0	0	0	0	0	0	0	0	0	0	0	0	0	0	1	1	0	d__Bacteria; p__Bacteroidetes; c__Bacteroidia; o__Cytophagales; f__Hymenobacteraceae; g__Hymenobacter
OTU_1906	0	0	0	0	0	0	0	0	0	0	0	0	0	0	0	0	0	0	0	0	1	1	0	0	1	0	1	0	0	0	0	1	0	1	0	0	0	0	0	0	0	0	0	0	0	Unclassified
OTU_1907	2	2	2	2	1	0	3	5	5	2	1	2	1	1	1	0	0	0	0	0	1	1	0	0	0	0	0	1	0	0	0	0	0	0	0	0	0	0	0	0	0	0	0	1	0	d__Bacteria; p__Actinobacteria; c__Actinobacteria; o__Streptomycetales; f__Streptomycetaceae; g__Streptomyces
OTU_1908	0	3	0	0	0	1	1	0	7	1	0	2	1	0	1	0	0	0	1	0	0	0	0	0	1	0	3	0	0	0	0	0	0	0	0	0	1	0	0	0	0	0	0	0	0	d__Bacteria; p__Planctomycetes; c__Planctomycetacia; o__Planctomycetales; f__Rubinisphaeraceae; g__SH_PL14; s__uncultured_bacterium
OTU_1909	0	1	2	0	0	1	2	0	4	2	1	1	2	1	0	0	0	0	3	0	0	0	0	0	0	0	1	0	0	0	0	0	0	0	0	0	0	0	0	0	0	0	0	0	0	d__Bacteria; p__Planctomycetes; c__Planctomycetacia; o__Gemmatales; f__Gemmataceae; g__uncultured
OTU_1910	1	0	0	1	0	0	0	0	0	0	1	0	0	0	1	0	0	0	0	0	0	0	0	0	0	0	0	0	0	0	0	0	0	0	0	0	0	0	0	0	0	0	0	0	0	d__Bacteria; p__Bacteroidetes; c__Bacteroidia
OTU_1911	1	2	5	1	2	2	2	1	1	2	2	2	2	0	5	0	0	0	3	0	0	0	0	0	0	0	0	0	0	0	0	0	0	0	0	0	0	0	0	0	0	0	0	0	0	d__Bacteria; p__Proteobacteria; c__Gammaproteobacteria; o__Nitrosococcales; f__Nitrosococcaceae; g__wb1_P19; s__uncultured_bacterium
OTU_1912	0	0	0	0	1	0	1	2	0	1	0	0	1	0	0	0	0	0	0	0	0	0	0	0	0	0	0	0	0	0	0	0	0	0	0	0	0	0	0	0	0	0	0	0	0	d__Bacteria; p__Proteobacteria; c__Gammaproteobacteria; o__Betaproteobacteriales
OTU_1913	1	7	2	2	4	6	2	7	6	13	4	6	4	3	33	3	4	0	21	1	5	5	2	2	2	2	1	2	2	75	3	1	0	9	12	15	0	3	1	0	1	2	1	1	2	d__Bacteria; p__Actinobacteria; c__Actinobacteria; o__Micrococcales; f__Microbacteriaceae; g__Microbacterium
OTU_1914	65	65	24	31	46	47	34	12	4	197	91	49	69	43	12	22	3	215	68	19	72	81	9	10	24	20	53	50	52	69	0	0	0	12	0	3	0	1	0	0	5	2	0	0	0	d__Bacteria; p__Bacteroidetes; c__Bacteroidia; o__Cytophagales; f__Hymenobacteraceae; g__Hymenobacter
OTU_1915	0	0	0	0	0	0	0	0	0	0	0	0	0	0	0	0	1	0	0	0	1	0	0	0	1	0	0	0	0	0	0	0	0	0	0	15	1	0	0	5	0	2	0	0	0	d__Bacteria; p__Bacteroidetes; c__Bacteroidia; o__Flavobacteriales; f__Flavobacteriaceae; g__Flavobacterium
OTU_1916	0	1	0	0	0	0	0	0	8	0	0	0	0	0	0	0	0	0	0	0	0	0	0	0	0	0	0	0	0	0	0	0	0	0	0	0	0	0	0	0	0	0	0	0	0	d__Bacteria; p__Chlamydiae; c__Chlamydiae; o__Chlamydiales; f__Parachlamydiaceae
OTU_1917	1	0	2	0	0	0	0	0	0	0	1	2	0	0	2	0	0	0	1	1	1	0	0	0	0	0	0	0	0	0	0	0	0	0	0	0	0	0	0	0	0	0	0	0	0	d__Bacteria; p__Proteobacteria; c__Alphaproteobacteria; o__Micropepsales; f__Micropepsaceae; g__uncultured; s__metagenome
OTU_1918	1	0	0	0	0	0	0	0	2	1	0	2	1	0	0	0	0	0	0	0	1	0	0	0	0	0	0	0	0	0	0	0	0	1	0	0	0	0	0	0	1	0	0	0	0	d__Bacteria; p__Actinobacteria; c__Thermoleophilia; o__Solirubrobacterales; f__67_14; g__67_14_ge; s__metagenome
OTU_1919	1	0	1	0	4	0	1	1	2	3	0	1	0	1	0	0	0	0	6	0	0	0	0	0	4	1	2	0	0	0	0	0	0	0	0	0	0	0	0	0	0	0	0	0	0	d__Bacteria; p__Chloroflexi; c__Dehalococcoidia; o__S085; f__S085_fa; g__S085_ge
OTU_192	1	1	2	2	0	1	26	0	1	189	27	18	5	2	0	0	0	0	0	0	1	0	0	0	0	0	0	0	0	0	0	0	0	0	0	0	0	0	0	0	0	0	0	0	0	Unclassified
OTU_1920	0	0	0	0	1	2	0	3	1	3	2	0	1	0	0	13	1	19	10	2	24	5	24	1	1	1	3	0	4	10	1	39	1	1	18	4	3	7	1	7	22	4	18	4	7	d__Bacteria; p__Actinobacteria; c__Actinobacteria; o__Frankiales
OTU_1921	0	2	3	2	0	2	2	0	4	3	3	1	1	1	0	0	0	0	0	0	1	0	0	0	1	1	1	0	0	0	0	0	0	4	0	0	0	0	0	0	1	0	0	0	0	d__Bacteria; p__Proteobacteria; c__Alphaproteobacteria; o__Tistrellales; f__Geminicoccaceae; g__Candidatus_Alysiosphaera
OTU_1924	2	1	3	0	0	0	0	4	70	3	1	2	0	1	23	0	0	0	2	0	0	1	0	0	3	0	1	0	0	0	0	105	0	0	29	0	0	0	0	0	0	0	0	0	0	d__Bacteria; p__Firmicutes; c__Bacilli; o__Bacillales; f__Bacillaceae; g__Bacillus
OTU_1925	0	0	0	0	0	0	0	1	0	0	0	0	0	0	0	0	0	0	6	0	0	0	0	0	0	1	0	0	1	0	1	0	0	0	2	0	0	0	0	0	0	0	0	1	0	d__Bacteria; p__Proteobacteria; c__Alphaproteobacteria; o__uncultured; f__uncultured_fa; g__uncultured_ge; s__uncultured_Rhodobiaceae_bacterium
OTU_1926	1	0	1	0	0	0	0	2	0	2	1	0	3	0	0	0	0	0	1	0	0	0	0	0	0	0	0	0	0	0	0	0	0	0	0	0	0	0	0	0	0	0	0	0	0	d__Bacteria; p__Actinobacteria; c__Thermoleophilia; o__Solirubrobacterales
OTU_1927	0	0	3	0	0	1	0	0	0	0	0	0	0	0	0	0	0	0	2	0	0	0	0	0	0	0	0	0	0	0	0	0	0	0	0	0	0	0	0	0	0	0	0	0	0	d__Bacteria; p__Elusimicrobia; c__Elusimicrobia; o__Lineage_IV; f__Lineage_IV_fa; g__Lineage_IV_ge; s__metagenome
OTU_1928	1	2	3	2	1	0	1	3	0	0	0	0	0	0	0	0	0	0	0	0	0	0	0	0	0	0	0	0	0	0	0	0	0	0	0	0	0	0	0	0	0	0	0	0	0	d__Bacteria; p__Firmicutes; c__Clostridia; o__Clostridiales; f__Lachnospiraceae; g__Lachnoclostridium; s__metagenome
OTU_1929	0	0	0	0	0	0	1	1	2	0	1	1	1	1	0	0	0	0	0	0	0	0	0	0	0	0	0	0	0	0	0	0	0	0	0	0	0	0	0	0	0	0	0	0	0	d__Bacteria; p__Gemmatimonadetes; c__Longimicrobia; o__Longimicrobiales; f__Longimicrobiaceae; g__Longimicrobiaceae_ge
OTU_193	2	24	61	13	9	158	2	1	2	7	28	8	4	7	6	56	11	37	20	53	20	5	3	28	6	20	93	9	3	1	2	0	0	0	1	0	6	8	8	0	0	3	1	7	8	d__Bacteria; p__Actinobacteria; c__Actinobacteria; o__Corynebacteriales; f__Nocardiaceae; g__Rhodococcus
OTU_1930	0	0	0	0	0	0	0	0	0	0	0	0	0	0	0	0	0	0	0	0	0	0	0	0	0	0	0	0	0	0	0	13	10	0	0	0	3	0	0	0	0	0	0	0	0	Unclassified
OTU_1931	1	3	0	0	1	1	0	0	1	0	0	0	0	0	0	0	0	0	2	0	0	0	0	0	0	0	0	0	0	0	0	0	0	0	0	0	0	0	0	0	0	0	0	0	0	d__Bacteria; p__Proteobacteria; c__Alphaproteobacteria
OTU_1932	0	0	1	1	0	0	3	1	4	1	1	0	2	0	0	0	0	0	0	0	0	0	0	0	0	0	0	0	0	0	0	0	0	0	0	0	0	0	0	0	0	0	0	0	0	d__Bacteria; p__Proteobacteria; c__Alphaproteobacteria; o__Rhodospirillales; f__Rhodospirillaceae; g__uncultured; s__metagenome
OTU_1933	3	1	2	0	1	0	1	1	1	2	0	2	0	1	2	0	0	0	2	0	0	0	0	0	0	0	0	0	0	0	0	0	0	0	0	0	0	0	0	0	0	0	0	0	0	d__Bacteria; p__Proteobacteria; c__Deltaproteobacteria; o__Myxococcales; f__Sandaracinaceae
OTU_1934	0	1	2	0	1	0	0	1	2	3	1	1	1	3	1	0	0	0	2	0	0	0	0	0	0	0	0	0	0	0	0	0	0	0	0	0	0	0	0	0	0	0	0	0	0	d__Bacteria; p__Proteobacteria; c__Alphaproteobacteria; o__Rhizobiales; f__Labraceae; g__Labrys; s__metagenome
OTU_1935	0	1	0	2	1	0	0	0	0	2	1	0	1	0	0	1	0	198	0	0	10	10	23	0	1	0	4	0	0	0	6	12	0	1	0	3	7	1	5	12	52	3	23	83	112	d__Bacteria; p__Bacteroidetes; c__Bacteroidia; o__Chitinophagales; f__Chitinophagaceae; g__uncultured
OTU_1936	0	0	0	0	0	0	2	0	1	2	0	0	2	0	0	0	0	0	1	0	0	0	0	0	0	0	0	0	0	0	0	0	0	0	0	0	0	0	0	0	0	0	0	0	0	d__Bacteria; p__Verrucomicrobia; c__Verrucomicrobiae; o__Verrucomicrobiales; f__Verrucomicrobiaceae; g__Roseimicrobium
OTU_1937	1	0	0	1	1	2	1	1	4	0	0	0	1	0	0	0	0	0	0	0	0	0	0	0	0	0	0	0	0	0	0	0	0	0	0	0	0	0	0	0	0	0	0	0	0	d__Bacteria; p__Planctomycetes; c__Pla4_lineage; o__Pla4_lineage_or; f__Pla4_lineage_fa; g__Pla4_lineage_ge
OTU_1938	0	0	0	0	0	0	2	2	1	1	0	0	2	1	1	0	0	0	0	0	0	0	0	0	0	0	0	0	0	0	0	0	0	0	0	0	0	0	0	0	0	0	0	0	0	d__Bacteria; p__Gemmatimonadetes; c__Gemmatimonadetes; o__Gemmatimonadales; f__Gemmatimonadaceae
OTU_1939	1	1	3	0	0	1	1	1	1	0	1	0	1	0	0	0	0	0	0	0	0	0	0	0	0	0	0	0	0	0	0	0	0	0	0	0	0	0	0	0	0	0	0	0	0	d__Bacteria; p__Planctomycetes; c__Phycisphaerae; o__Tepidisphaerales; f__WD2101_soil_group; g__WD2101_soil_group_ge; s__uncultured_planctomycete
OTU_194	36	50	49	32	46	38	76	85	137	70	42	31	62	33	18	0	0	0	0	1	0	0	0	0	1	1	0	0	0	0	0	0	0	0	0	0	0	0	0	0	0	0	0	0	0	d__Bacteria; p__Gemmatimonadetes; c__Gemmatimonadetes; o__Gemmatimonadales; f__Gemmatimonadaceae; g__uncultured
OTU_1940	1	2	0	0	2	0	1	1	0	2	1	1	2	0	0	0	0	0	1	1	0	0	0	0	0	0	0	0	0	0	0	0	0	0	0	0	0	0	0	0	0	0	0	0	0	d__Bacteria; p__Proteobacteria; c__Deltaproteobacteria; o__Myxococcales; f__Sandaracinaceae; g__uncultured
OTU_1941	0	0	0	0	0	0	0	0	0	0	0	0	0	0	0	0	0	0	0	0	0	0	0	0	0	0	0	0	0	0	0	0	0	0	0	54	0	0	0	0	0	0	0	0	0	d__Bacteria; p__Proteobacteria; c__Gammaproteobacteria; o__Gammaproteobacteria_Incertae_Sedis; f__Unknown_Family; g__Candidatus_Berkiella
OTU_1942	0	1	0	0	0	0	1	4	1	0	0	0	0	0	1	0	0	0	0	0	0	1	0	0	0	0	0	0	0	0	0	0	0	0	0	0	0	0	0	0	0	0	0	0	0	d__Bacteria; p__Proteobacteria; c__Alphaproteobacteria; o__Acetobacterales; f__Acetobacteraceae
OTU_1943	2	1	4	5	1	4	5	4	8	4	2	0	3	3	0	0	0	0	2	1	0	0	0	0	0	1	0	0	0	0	0	0	0	0	0	0	0	0	0	0	0	0	0	0	0	d__Bacteria; p__Chloroflexi; c__KD4_96; o__KD4_96_or; f__KD4_96_fa; g__KD4_96_ge; s__uncultured_bacterium
OTU_1944	0	0	0	0	0	2	4	1	2	1	0	0	0	0	0	0	0	0	0	0	0	0	0	0	0	0	0	0	0	0	0	0	0	0	0	0	0	0	0	0	0	0	0	0	0	d__Bacteria; p__Chloroflexi; c__Anaerolineae; o__SBR1031; f__SBR1031_fa; g__SBR1031_ge; s__uncultured_soil_bacterium
OTU_1945	0	0	0	0	0	0	0	0	0	0	0	0	0	0	0	4	2	0	0	0	0	0	0	1	0	0	1	0	1	0	296	206	59	869	166	641	495	201	61	484	840	703	20	16	54	d__Bacteria; p__Proteobacteria; c__Alphaproteobacteria; o__Rhizobiales; f__Beijerinckiaceae; g__1174_901_12
OTU_1946	0	0	0	0	0	0	0	0	0	0	0	0	0	0	0	0	0	0	0	0	0	0	0	0	0	0	0	0	0	0	15	0	0	0	1	11	0	1	0	0	0	3	0	0	0	d__Bacteria
OTU_1947	0	0	0	0	0	0	0	0	0	0	0	0	0	0	0	0	0	1	0	0	0	0	0	0	0	0	0	0	0	11	0	0	0	0	0	12	0	0	0	0	0	0	0	0	0	d__Bacteria; p__Proteobacteria; c__Alphaproteobacteria; o__Caedibacterales; f__Caedibacteraceae; g__Caedibacter
OTU_1948	1	1	4	0	1	1	4	2	3	6	3	1	1	0	0	1	0	0	46	3	2	2	2	1	2	1	4	0	1	0	1	0	0	0	5	2	0	0	0	0	0	1	0	0	0	d__Bacteria; p__Proteobacteria; c__Alphaproteobacteria; o__Rhizobiales; f__Methyloligellaceae; g__uncultured
OTU_1949	1	3	0	0	1	1	1	2	4	2	0	1	1	0	0	0	0	0	0	0	0	0	0	0	0	0	0	0	0	0	0	0	0	0	0	0	0	0	0	0	0	0	0	0	0	d__Bacteria; p__Chloroflexi; c__Chloroflexia; o__Kallotenuales; f__AKIW781; g__AKIW781_ge
OTU_1950	0	0	0	0	0	0	0	0	0	0	0	0	0	0	0	0	0	0	0	0	0	0	0	0	0	0	0	0	0	0	0	2	0	15	12	6	13	4	0	28	9	7	1	2	2	Unclassified
OTU_1952	1	0	0	0	0	0	0	0	4	1	2	1	1	0	0	0	0	0	2	0	0	0	0	0	0	0	0	0	0	0	0	0	0	0	0	0	0	0	0	0	0	0	0	0	0	d__Bacteria; p__Bacteroidetes; c__Bacteroidia; o__Cytophagales; f__Microscillaceae; g__uncultured; s__uncultured_Cyclobacteriaceae_bacterium
OTU_1953	0	0	0	1	0	0	0	0	1	2	0	0	0	1	0	0	0	0	0	0	0	0	0	0	0	0	0	0	0	0	0	0	0	0	0	0	0	0	0	0	0	0	0	0	0	d__Bacteria; p__Planctomycetes; c__Planctomycetacia; o__Pirellulales; f__Pirellulaceae; g__uncultured
OTU_1956	0	0	0	0	0	0	0	0	0	0	0	0	1	0	0	0	0	26	0	0	3	1	0	0	1	2	2	0	0	0	0	0	0	2	0	0	0	0	0	0	0	0	2	2	0	d__Bacteria; p__Verrucomicrobia; c__Verrucomicrobiae; o__Verrucomicrobiales; f__Verrucomicrobiaceae; g__uncultured
OTU_1957	2	3	4	1	0	1	6	2	0	2	2	1	0	1	0	0	0	1	0	2	3	0	0	3	2	1	2	0	1	1	1	4	2	1	0	0	1	1	2	1	1	1	3	2	0	d__Bacteria; p__Actinobacteria; c__Actinobacteria; o__Frankiales; f__Geodermatophilaceae
OTU_1958	4	7	3	19	23	5	3	13	4	7	18	9	2	19	0	0	0	3	1	0	34	1	2	0	5	0	3	0	18	2	0	0	0	0	0	0	0	2	0	0	0	0	0	0	0	d__Bacteria; p__Bacteroidetes; c__Bacteroidia; o__Chitinophagales; f__Chitinophagaceae; g__Segetibacter
OTU_1959	0	0	0	0	0	0	0	0	0	0	0	0	0	0	0	0	0	0	0	0	0	0	0	0	0	0	0	0	0	0	6	4	7	0	0	0	0	0	0	0	13	0	0	0	0	d__Bacteria; p__Proteobacteria; c__Alphaproteobacteria; o__Acetobacterales; f__Acetobacteraceae; g__uncultured; s__uncultured_Acetobacteraceae_bacterium
OTU_196	12	9	7	31	47	16	20	28	32	32	30	20	12	7	3	0	0	1	15	3	7	1	0	1	5	1	4	0	6	0	0	0	0	5	0	1	0	0	0	0	0	0	0	0	0	d__Bacteria; p__Proteobacteria; c__Gammaproteobacteria; o__Betaproteobacteriales; f__Burkholderiaceae; g__Lautropia; s__metagenome
OTU_1960	0	0	0	0	0	0	0	0	0	0	0	0	0	0	0	0	0	0	0	0	0	0	0	0	0	0	0	0	0	0	7	0	0	0	0	4	8	1	4	0	1	2	18	22	28	d__Bacteria; p__Verrucomicrobia; c__Verrucomicrobiae
OTU_1961	0	0	0	0	0	0	0	0	0	0	0	0	0	0	0	1	1	5	1	0	1	0	1	0	0	0	0	0	0	0	0	0	0	0	0	0	0	1	3	1	3	0	7	5	0	d__Bacteria; p__Proteobacteria; c__Deltaproteobacteria; o__Myxococcales; f__Polyangiaceae; g__Pajaroellobacter
OTU_1962	0	0	0	0	0	0	1	0	2	0	0	1	1	0	1	0	0	0	44	11	0	1	0	1	9	2	10	0	1	0	0	0	0	0	7	0	0	1	0	1	1	1	0	0	0	d__Bacteria; p__Entotheonellaeota; c__Entotheonellia; o__Entotheonellales; f__Entotheonellaceae; g__Entotheonellaceae_ge; s__metagenome
OTU_1963	0	6	2	0	0	1	6	4	9	8	4	3	2	1	2	0	0	0	3	0	0	0	0	0	0	0	0	0	0	0	0	0	0	0	0	0	0	0	0	0	0	0	0	0	0	d__Bacteria; p__Bacteroidetes; c__Bacteroidia; o__Cytophagales; f__Microscillaceae; g__uncultured
OTU_1964	0	0	0	0	0	0	0	2	4	1	0	0	1	0	0	0	0	0	0	0	0	0	0	0	0	1	0	0	0	0	0	0	0	0	0	0	0	0	0	0	0	0	0	0	0	d__Bacteria; p__Gemmatimonadetes; c__Gemmatimonadetes; o__Gemmatimonadales; f__Gemmatimonadaceae
OTU_1965	0	1	1	0	0	0	1	1	3	0	0	1	2	0	0	0	0	0	0	0	0	0	0	0	0	0	0	0	0	0	0	0	0	0	0	0	0	0	0	0	0	0	0	0	0	d__Bacteria; p__Chloroflexi; c__Chloroflexia; o__Kallotenuales; f__AKIW781; g__AKIW781_ge
OTU_1966	0	0	0	0	0	0	0	0	0	0	0	0	0	0	0	0	0	0	0	0	0	0	0	0	0	0	0	0	0	0	0	0	0	1	0	1	0	1	2	32	11	17	0	0	0	d__Bacteria
OTU_1967	1	0	1	1	0	2	1	1	2	0	0	0	0	0	0	0	0	0	0	0	0	0	0	0	0	0	0	0	0	0	0	0	0	0	0	0	0	0	0	0	0	0	0	0	0	d__Bacteria; p__Planctomycetes; c__Phycisphaerae; o__Phycisphaerales; f__Phycisphaeraceae; g__I_8; s__uncultured_bacterium
OTU_1968	1	1	0	1	0	0	0	0	3	1	0	2	0	0	0	0	0	0	0	0	0	0	0	0	0	0	0	0	0	0	0	0	0	0	0	0	0	0	0	0	0	0	0	0	0	d__Bacteria; p__Armatimonadetes; c__uncultured; o__uncultured_or; f__uncultured_fa; g__uncultured_ge
OTU_1969	0	0	2	0	0	2	0	0	0	1	0	0	0	0	0	0	0	0	12	0	0	0	0	0	0	0	2	0	0	0	0	0	0	0	0	1	0	0	0	0	0	0	0	0	0	d__Bacteria; p__Bacteroidetes; c__Bacteroidia; o__Chitinophagales
OTU_1970	0	0	0	0	0	0	0	0	0	0	0	0	0	0	0	0	0	0	0	0	0	0	0	0	0	0	0	0	0	0	0	2	0	6	29	3	2	0	0	0	0	0	0	0	0	d__Bacteria
OTU_1972	2	0	0	0	2	0	2	0	0	0	0	0	0	0	0	0	0	0	0	0	0	0	0	0	0	0	2	0	0	0	0	0	0	0	1	0	0	0	0	0	0	0	0	0	0	d__Bacteria; p__Deinococcus_Thermus; c__Deinococci; o__Deinococcales; f__Deinococcaceae; g__Deinococcus; s__Deinococcus_reticulitermitis
OTU_1974	2	2	2	3	0	1	1	0	1	2	0	0	1	0	0	0	0	0	0	0	0	0	0	0	0	0	0	0	0	0	0	0	0	0	0	0	0	0	0	0	0	0	0	0	0	d__Bacteria; p__Chloroflexi; c__Chloroflexia; o__Chloroflexales; f__Herpetosiphonaceae; g__Herpetosiphon; s__uncultured_Chloroflexi_bacterium
OTU_1975	1	1	0	1	0	0	0	0	0	1	0	0	1	0	1	0	0	0	0	0	0	0	0	0	0	0	0	0	0	0	0	0	0	0	0	0	0	0	0	0	0	0	0	0	0	d__Bacteria; p__Chloroflexi; c__Anaerolineae; o__SBR1031; f__A4b; g__A4b_ge; s__uncultured_bacterium
OTU_1977	0	2	0	0	0	0	0	1	5	1	1	0	0	0	0	0	0	0	0	0	0	0	0	0	0	0	0	0	0	0	0	0	0	0	0	0	0	0	0	0	0	0	0	0	0	d__Bacteria; p__Chloroflexi
OTU_1978	1	1	0	1	1	0	2	0	1	0	0	0	0	0	0	0	0	0	0	0	0	0	0	0	0	0	2	0	0	0	0	0	0	0	0	0	0	0	0	0	0	0	0	0	0	d__Bacteria; p__Chloroflexi; c__Anaerolineae; o__SBR1031; f__SBR1031_fa; g__SBR1031_ge
OTU_1979	0	0	0	0	0	0	0	0	0	0	0	0	0	0	0	0	0	0	0	0	0	0	1	0	0	0	0	0	0	0	3	6	0	8	5	0	3	0	2	7	25	0	0	1	4	d__Bacteria; p__Proteobacteria; c__Deltaproteobacteria; o__Oligoflexales; f__0319_6G20; g__0319_6G20_ge
OTU_198	3	18	14	12	15	9	19	12	18	12	14	15	8	6	247	2	0	9	3	6	2	1	6	0	0	5	0	0	0	0	0	0	0	11	0	1	3	6	1	0	4	0	1	2	0	d__Bacteria; p__Actinobacteria; c__Actinobacteria; o__Propionibacteriales; f__Nocardioidaceae; g__Aeromicrobium; s__uncultured_bacterium
OTU_1980	0	0	0	0	0	0	0	0	0	0	0	0	0	0	0	0	0	0	0	0	0	0	0	0	0	0	0	0	0	0	10	1	5	5	3	0	5	18	8	4	8	16	2	0	2	d__Bacteria; p__Planctomycetes; c__Planctomycetacia; o__Isosphaerales; f__Isosphaeraceae; g__Singulisphaera
OTU_1981	1	0	0	0	0	0	4	0	0	0	1	0	1	0	0	0	0	0	0	1	1	1	0	0	1	2	3	0	0	0	0	0	2	0	0	0	0	0	0	0	0	0	0	0	0	d__Bacteria; p__Proteobacteria; c__Alphaproteobacteria; o__Caedibacterales; f__Caedibacteraceae; g__Caedibacter
OTU_1983	1	1	1	1	0	2	0	1	6	2	1	1	3	2	1	0	0	0	0	0	0	0	0	0	0	0	0	0	0	0	0	0	0	0	0	0	0	0	0	0	0	0	0	0	0	d__Bacteria; p__Proteobacteria; c__Deltaproteobacteria; o__Myxococcales; f__Haliangiaceae; g__Haliangium
OTU_1984	0	0	1	3	2	0	1	1	0	1	0	0	0	0	0	0	0	0	0	0	0	0	0	0	0	0	0	0	0	0	0	0	0	0	0	0	0	0	0	0	0	0	0	0	0	d__Bacteria; p__Proteobacteria; c__Alphaproteobacteria; o__Rhodobacterales; f__Rhodobacteraceae
OTU_1985	0	0	0	0	0	0	0	0	0	0	0	0	0	0	0	0	0	0	0	0	0	0	0	0	0	0	0	0	0	0	12	1	15	2	1	1	18	5	17	0	7	2	7	1	6	d__Bacteria; p__Verrucomicrobia; c__Verrucomicrobiae
OTU_1986	0	0	0	0	3	1	2	1	0	0	0	0	0	0	0	0	0	0	0	0	0	0	0	0	0	0	0	0	0	0	0	0	0	0	0	0	0	0	0	0	0	0	0	0	0	d__Bacteria; p__Verrucomicrobia; c__Verrucomicrobiae; o__Pedosphaerales; f__Pedosphaeraceae; g__Pedosphaeraceae_ge
OTU_1987	0	0	0	13	0	0	0	0	0	0	0	0	0	1	1	0	0	0	2	0	0	0	0	0	0	0	0	0	0	0	0	0	0	0	0	0	0	0	0	0	0	0	0	0	0	d__Bacteria; p__Proteobacteria; c__Alphaproteobacteria; o__Rhizobiales
OTU_1988	1	1	3	1	0	0	2	0	0	1	1	2	1	0	1	1	0	0	1	1	0	0	0	1	1	0	0	0	0	0	0	0	0	0	0	0	0	1	0	0	0	0	0	0	0	d__Bacteria; p__Proteobacteria; c__Alphaproteobacteria; o__Acetobacterales; f__Acetobacteraceae; g__Craurococcus; s__uncultured_bacterium
OTU_1989	0	0	0	0	0	0	0	0	0	0	0	0	0	0	0	0	0	0	0	0	0	0	0	0	0	0	0	0	0	0	1	14	0	0	0	0	0	1	2	2	0	10	0	0	0	d__Bacteria
OTU_1990	3	2	1	0	0	0	181	5	6	2	0	0	2	1	1	0	0	0	1	18	2	1	1	0	0	0	1	0	0	0	0	0	0	0	5	0	0	0	0	0	0	0	0	0	0	d__Bacteria; p__Firmicutes; c__Bacilli; o__Bacillales; f__Family_XII; g__Exiguobacterium; s__Exiguobacterium_antarcticum_B7
OTU_1991	0	0	1	0	0	0	1	1	0	0	0	0	0	0	0	0	0	0	2	0	0	0	0	0	0	0	1	0	0	0	0	0	0	0	0	0	0	0	0	0	0	0	0	0	0	d__Bacteria; p__Actinobacteria; c__Acidimicrobiia
OTU_1992	0	0	0	0	0	0	1	0	0	0	0	0	0	0	0	0	0	24	0	0	0	0	0	0	0	0	0	0	0	0	0	0	0	0	0	0	0	0	0	12	0	0	0	0	0	d__Bacteria; p__Bacteroidetes; c__Bacteroidia; o__Flavobacteriales; f__Flavobacteriaceae; g__Flavobacterium
OTU_1993	0	0	0	0	0	0	0	0	0	0	0	0	0	0	0	1	0	0	28	3	1	2	0	1	7	2	16	0	0	0	0	0	0	0	2	0	1	0	0	0	0	1	0	0	0	d__Bacteria; p__Verrucomicrobia; c__Verrucomicrobiae; o__Chthoniobacterales; f__Chthoniobacteraceae; g__Candidatus_Udaeobacter
OTU_1995	0	0	0	0	0	0	0	0	0	0	0	0	0	0	0	0	0	0	0	0	0	0	0	0	0	0	0	0	0	0	0	0	2	1	3	0	0	0	2	1	0	1	0	1	0	d__Bacteria; p__Proteobacteria; c__Alphaproteobacteria; o__Acetobacterales; f__Acetobacteraceae
OTU_1996	0	1	0	1	3	0	0	0	1	0	1	0	1	0	0	0	0	0	0	1	0	0	0	0	0	0	0	0	0	0	0	0	0	0	0	0	0	0	0	0	0	0	0	0	0	d__Bacteria; p__Actinobacteria; c__0319_7L14; o__0319_7L14_or; f__0319_7L14_fa; g__0319_7L14_ge; s__uncultured_actinobacterium
OTU_1997	1	0	1	1	2	0	0	0	0	3	0	2	0	2	0	0	0	0	0	0	0	0	0	0	0	0	0	0	0	0	0	0	0	0	0	0	0	0	0	0	0	0	0	0	0	Unclassified
OTU_1998	0	0	0	0	0	0	0	0	0	0	0	0	0	0	0	0	0	0	6	0	2	15	5	0	0	0	10	0	6	4	0	0	0	0	0	0	0	0	0	0	0	0	0	0	1	Unclassified
OTU_1999	0	0	0	0	1	0	0	0	0	1	2	0	0	0	0	0	2	0	0	0	0	0	0	0	1	1	0	0	0	0	0	0	0	0	0	0	0	0	0	0	0	0	0	0	0	Unclassified
OTU_2	480	433	158	242	937	361	509	92	52	475	221	58	355	163	153	28	17	27	4	39	72	11	9	19	25	42	195	40	210	40	0	0	0	2	1	0	0	1	0	0	1	0	0	0	0	d__Bacteria; p__Bacteroidetes; c__Bacteroidia; o__Cytophagales; f__Spirosomaceae; g__Dyadobacter; s__metagenome
OTU_20	624	500	150	938	1054	330	250	611	247	1292	1022	615	509	177	85	4	4	0	30	26	173	42	15	5	76	74	89	1	14	13	1	2	0	367	3	0	1	1	0	0	1	0	0	1	1	d__Bacteria; p__Proteobacteria; c__Alphaproteobacteria; o__Azospirillales; f__Azospirillaceae; g__Skermanella
OTU_200	23	26	20	6	8	13	33	49	69	45	18	33	26	16	21	5	2	0	178	22	25	10	5	0	34	12	28	1	12	6	11	4	0	8	7	1	4	1	9	5	8	5	3	8	4	d__Bacteria; p__Proteobacteria; c__Alphaproteobacteria; o__Rhizobiales; f__Xanthobacteraceae; g__Bradyrhizobium
OTU_2001	0	0	1	3	0	0	0	1	0	0	0	1	0	0	0	0	0	0	0	0	0	1	0	0	0	0	0	0	0	0	0	4	0	0	0	0	3	1	0	0	5	0	3	0	0	d__Bacteria; p__Armatimonadetes; c__Armatimonadia; o__Armatimonadales; f__Armatimonadales_fa; g__Armatimonadales_ge
OTU_2002	0	0	0	0	3	0	2	1	1	1	0	0	1	0	2	0	0	0	1	0	1	0	0	0	0	0	0	0	0	0	0	0	0	0	0	0	0	0	0	0	0	0	0	0	0	d__Bacteria; p__Chloroflexi; c__JG30_KF_CM66; o__JG30_KF_CM66_or; f__JG30_KF_CM66_fa; g__JG30_KF_CM66_ge; s__metagenome
OTU_2003	1	3	1	0	5	0	0	1	1	0	0	0	0	0	0	0	0	0	0	0	0	0	0	0	0	0	0	0	0	0	0	0	0	0	0	0	0	0	0	0	0	0	0	0	0	d__Bacteria; p__Firmicutes; c__Clostridia; o__Clostridiales; f__Lachnospiraceae; g__Lachnospiraceae_ge; s__metagenome
OTU_2004	207	196	66	147	260	48	276	13	33	2352	2411	203	134	1362	47	11	39	2	0	1	0	2	0	0	0	0	7	2	0	16	1	0	1	0	1	0	0	0	0	0	0	0	0	1	1	d__Bacteria
OTU_2005	1	1	0	2	1	21	1	0	1	19	2	0	13	3	0	1	1	6	1	3	3	0	0	0	0	0	3	0	2	3	0	0	0	7	0	3	0	35	2	8	4	5	9	11	4	d__Bacteria; p__Bacteroidetes; c__Bacteroidia; o__Sphingobacteriales; f__Sphingobacteriaceae; g__Mucilaginibacter
OTU_2006	54	42	22	19	37	37	68	17	13	60	39	21	36	38	14	148	98	332	77	76	188	94	113	41	141	163	108	78	35	325	0	3	0	7	0	5	5	0	0	3	1	1	13	45	64	d__Bacteria; p__Proteobacteria; c__Alphaproteobacteria; o__Rhizobiales; f__Beijerinckiaceae; g__Methylobacterium
OTU_2008	2	1	1	3	0	1	2	0	2	1	2	1	0	0	0	0	0	0	0	1	0	0	0	0	0	0	0	0	0	0	0	0	0	0	0	0	0	0	0	0	0	0	0	0	0	d__Bacteria; p__Proteobacteria; c__Alphaproteobacteria; o__Sphingomonadales; f__Sphingomonadaceae
OTU_2009	3	1	0	1	2	1	1	3	0	3	0	2	3	0	0	0	0	0	4	2	1	1	0	0	1	0	3	0	0	0	0	0	0	0	0	0	0	0	0	0	0	0	0	0	0	d__Bacteria; p__Proteobacteria; c__Alphaproteobacteria; o__Sphingomonadales; f__Sphingomonadaceae; g__Altererythrobacter
OTU_201	36	53	146	201	185	337	273	52	55	157	390	25	77	37	35	4	4	8	25	8	14	48	4	2	30	26	97	1	2	1	0	1	0	8	4	25	13	1	0	15	3	2	0	10	9	d__Bacteria; p__Proteobacteria; c__Alphaproteobacteria; o__Sphingomonadales; f__Sphingomonadaceae; g__Novosphingobium
OTU_2010	1	2	1	0	2	1	0	1	1	1	0	3	0	0	1	0	0	0	0	0	0	0	0	0	1	0	0	0	0	0	0	0	0	0	0	0	0	0	0	0	0	0	0	0	0	d__Bacteria; p__Proteobacteria; c__Alphaproteobacteria; o__Sphingomonadales; f__Sphingomonadaceae
OTU_2011	1	2	2	0	1	0	0	1	0	1	0	1	0	0	0	0	0	0	0	0	0	0	0	0	0	0	0	0	0	0	0	0	0	0	0	0	0	0	0	0	0	0	0	0	0	d__Bacteria; p__Planctomycetes; c__Planctomycetacia; o__Gemmatales; f__Gemmataceae; g__Fimbriiglobus; s__uncultured_bacterium
OTU_2012	0	0	0	0	0	0	0	0	0	0	0	3	2	0	2	0	0	0	1	0	3	1	0	0	0	0	0	0	0	0	0	0	0	6	1	1	0	0	2	0	19	0	0	1	2	d__Bacteria; p__Bacteroidetes; c__Bacteroidia; o__Sphingobacteriales; f__Sphingobacteriaceae; g__Mucilaginibacter; s__metagenome
OTU_2013	0	2	0	1	1	2	7	2	9	0	0	0	0	0	0	0	0	0	0	0	0	0	0	0	0	0	0	0	0	0	0	0	0	0	0	0	0	0	0	0	0	0	0	0	0	d__Bacteria; p__Firmicutes; c__Clostridia; o__Clostridiales; f__Lachnospiraceae; g__Blautia; s__metagenome
OTU_2014	0	0	0	0	0	0	0	0	0	0	0	0	0	0	0	0	0	0	0	0	0	0	0	0	0	0	0	0	0	0	0	6	1	0	0	1	2	0	3	0	0	2	0	0	0	d__Bacteria; p__Proteobacteria
OTU_2015	2	1	4	0	2	1	4	4	5	2	2	0	6	1	0	0	0	0	16	4	2	0	0	1	1	2	2	0	0	0	1	0	0	0	16	0	0	0	0	1	1	0	0	0	0	d__Bacteria; p__Acidobacteria; c__Subgroup_6; o__Subgroup_6_or; f__Subgroup_6_fa; g__Subgroup_6_ge
OTU_2016	0	1	1	0	0	0	6	1	0	0	0	0	1	0	0	0	0	0	2	1	1	0	0	0	0	0	0	0	0	0	0	0	0	0	0	0	0	0	0	0	0	0	0	0	0	d__Bacteria; p__Proteobacteria; c__Deltaproteobacteria; o__NB1_j; f__NB1_j_fa; g__NB1_j_ge; s__uncultured_proteobacterium
OTU_2017	0	0	0	0	0	0	0	0	0	0	0	0	0	0	1	1	0	0	0	0	1	0	1	0	0	0	0	0	0	1	14	18	2	1	0	1	0	2	0	0	1	1	0	0	0	d__Bacteria; p__Proteobacteria; c__Deltaproteobacteria; o__Myxococcales; f__P3OB_42; g__P3OB_42_ge
OTU_2018	1	1	1	1	1	0	0	0	0	0	0	0	0	1	1	0	0	0	0	0	0	0	0	0	0	0	0	0	0	0	0	0	0	0	0	0	0	0	0	0	0	0	0	0	0	d__Bacteria; p__Proteobacteria; c__Deltaproteobacteria; o__Myxococcales; f__Haliangiaceae; g__Haliangium
OTU_2019	0	0	0	0	1	0	4	1	3	1	0	1	1	1	0	0	0	0	0	0	0	0	0	0	0	0	0	0	0	0	0	0	0	0	0	0	0	0	0	0	0	0	0	0	0	d__Bacteria; p__Gemmatimonadetes; c__Gemmatimonadetes; o__Gemmatimonadales; f__Gemmatimonadaceae; g__Gemmatimonas
OTU_202	48	38	8	4	17	8	2	0	1	138	38	20	15	7	2	0	0	0	0	0	0	0	0	0	0	0	0	1	0	0	0	0	0	0	0	0	0	0	0	0	0	0	0	1	0	d__Bacteria; p__Bacteroidetes; c__Bacteroidia; o__Cytophagales; f__Hymenobacteraceae; g__Hymenobacter
OTU_2020	0	2	2	0	0	0	1	2	1	1	3	0	1	0	0	0	0	0	2	0	0	0	0	0	1	2	1	0	0	0	0	0	0	0	0	0	0	0	0	0	0	0	0	0	0	d__Bacteria; p__Chloroflexi; c__KD4_96; o__KD4_96_or; f__KD4_96_fa; g__KD4_96_ge; s__uncultured_bacterium
OTU_2021	2	0	0	0	2	2	0	0	0	0	1	0	1	0	0	0	0	0	0	0	0	0	0	0	0	0	0	0	0	0	0	0	0	0	0	0	0	0	0	0	0	0	0	0	0	d__Bacteria; p__Actinobacteria; c__Rubrobacteria; o__Rubrobacterales; f__Rubrobacteriaceae; g__Rubrobacter
OTU_2022	2	0	3	0	0	0	3	2	5	0	0	0	0	0	1	0	0	0	0	0	0	0	0	0	0	0	0	0	0	0	0	0	0	0	0	0	0	0	0	0	0	0	0	0	0	d__Bacteria; p__Planctomycetes; c__vadinHA49; o__vadinHA49_or; f__vadinHA49_fa; g__vadinHA49_ge
OTU_2026	0	0	0	0	0	0	0	0	0	0	0	0	0	0	0	0	0	0	0	0	0	0	0	0	0	0	0	0	0	0	2	3	1	2	1	4	0	0	1	7	5	2	1	0	3	d__Bacteria; p__Proteobacteria; c__Deltaproteobacteria; o__Bdellovibrionales; f__Bdellovibrionaceae; g__Bdellovibrio
OTU_2027	0	0	0	0	0	0	0	0	0	0	0	0	0	0	0	0	0	8	0	0	0	0	0	0	0	0	2	0	0	0	37	34	35	1	4	3	9	3	13	8	18	4	54	14	4	d__Bacteria; p__Proteobacteria; c__Alphaproteobacteria; o__Caulobacterales; f__Caulobacteraceae
OTU_2028	2	2	2	1	0	0	2	1	3	1	1	0	1	0	0	0	0	0	1	0	0	0	0	0	0	0	0	0	0	0	0	0	0	0	0	0	0	0	0	0	0	0	0	0	0	d__Bacteria; p__Actinobacteria; c__Acidimicrobiia
OTU_2029	0	0	0	1	0	0	0	0	0	0	0	1	0	0	3	0	0	0	0	0	0	0	0	0	0	0	0	0	0	0	0	0	0	0	0	0	0	0	0	0	0	0	0	0	0	d__Bacteria; p__Proteobacteria; c__Gammaproteobacteria; o__Coxiellales; f__Coxiellaceae; g__Coxiella
OTU_2030	0	0	0	0	0	0	0	0	0	0	0	0	0	0	0	3	0	0	20	0	0	0	0	0	0	0	0	0	0	0	0	0	0	0	0	0	0	0	0	0	0	0	0	0	0	Unclassified
OTU_2031	1	2	0	3	0	0	3	9	5	4	1	3	6	1	3	0	0	7	6	0	2	0	0	0	0	0	2	0	0	0	0	2	0	9	0	0	4	2	0	12	7	0	8	0	2	d__Bacteria; p__Actinobacteria; c__Thermoleophilia; o__Solirubrobacterales; f__Solirubrobacteraceae; g__Solirubrobacter
OTU_2032	0	0	1	0	0	0	2	1	1	2	0	0	0	0	0	0	0	0	0	0	0	0	0	0	0	0	0	0	0	0	0	0	0	0	0	0	1	0	0	0	0	0	0	0	0	d__Bacteria
OTU_2033	1	0	1	1	1	1	2	3	2	2	0	2	1	2	5	0	0	0	2	1	1	0	0	0	1	0	0	0	0	0	0	0	0	0	2	0	1	0	0	0	0	0	0	0	0	d__Bacteria; p__Gemmatimonadetes; c__Gemmatimonadetes; o__Gemmatimonadales; f__Gemmatimonadaceae; g__Gemmatimonas
OTU_2035	0	0	0	0	0	0	0	0	0	0	0	0	0	0	0	0	0	0	0	10	0	2	0	9	11	3	4	0	0	0	0	0	0	0	0	0	0	0	0	0	0	0	0	0	0	Unclassified
OTU_2037	1	1	2	7	2	2	2	3	1	4	0	0	0	1	0	1	0	5	3	0	8	3	4	0	2	0	1	0	4	4	4	6	5	11	0	0	5	1	7	2	5	5	1	7	10	d__Bacteria; p__Proteobacteria; c__Alphaproteobacteria; o__Rhizobiales; f__Beijerinckiaceae
OTU_2038	1	0	1	0	0	1	1	0	1	2	0	0	0	0	0	0	0	0	0	0	0	0	0	0	0	0	0	0	0	0	0	0	0	0	0	0	0	0	0	0	0	0	0	0	0	d__Bacteria; p__Planctomycetes; c__Phycisphaerae; o__Phycisphaerales; f__Phycisphaeraceae; g__uncultured
OTU_2039	0	1	1	1	0	0	1	1	3	2	2	2	0	0	0	0	0	0	3	0	0	0	0	0	0	0	0	0	0	0	0	0	0	0	0	0	0	0	0	0	0	0	0	0	0	d__Bacteria; p__Planctomycetes; c__Planctomycetacia; o__Pirellulales; f__Pirellulaceae; g__Pirellula; s__uncultured_planctomycete
OTU_204	23	9	5	33	26	13	5	28	7	33	41	22	7	10	2	0	0	0	0	0	0	0	0	0	0	0	0	0	0	0	0	0	0	0	0	0	0	0	0	0	0	0	0	0	0	d__Bacteria; p__Bacteroidetes; c__Bacteroidia; o__Cytophagales; f__Cytophagaceae; g__Rhodocytophaga; s__uncultured_bacterium
OTU_2040	10	27	29	15	24	16	40	8	11	34	25	12	28	33	26	27	48	167	27	21	66	29	22	13	15	9	14	43	15	29	13	58	2	7	28	11	4	6	2	9	22	12	9	24	25	d__Bacteria; p__Proteobacteria; c__Gammaproteobacteria; o__Betaproteobacteriales; f__Burkholderiaceae
OTU_2042	0	0	0	3	3	0	0	0	0	3	1	0	1	0	0	0	0	5	0	0	5	0	1	0	1	3	0	1	1	0	0	1	8	1	0	4	2	0	2	0	1	0	3	14	4	d__Bacteria; p__FBP; c__FBP_cl; o__FBP_or; f__FBP_fa; g__FBP_ge
OTU_2043	2	1	1	1	2	2	0	3	3	2	0	1	1	0	0	0	0	0	4	0	0	0	0	0	0	0	0	0	0	0	0	0	0	0	0	0	0	0	0	0	0	0	0	0	0	d__Bacteria; p__Actinobacteria; c__Thermoleophilia; o__Solirubrobacterales; f__67_14; g__67_14_ge; s__uncultured_bacterium
OTU_2044	0	0	1	0	1	0	1	0	3	0	0	0	0	0	1	0	0	0	1	0	0	0	0	0	0	0	0	0	0	0	0	0	0	0	2	0	0	1	0	0	0	0	0	0	0	d__Bacteria; p__Planctomycetes; c__Planctomycetacia; o__Isosphaerales; f__Isosphaeraceae; g__Singulisphaera
OTU_2045	0	0	0	0	0	0	0	0	0	0	0	0	0	0	0	0	0	1	0	0	0	0	0	0	0	0	0	0	0	0	0	0	0	24	0	0	0	0	0	0	0	0	0	0	0	d__Bacteria; p__Proteobacteria; c__Gammaproteobacteria; o__Legionellales; f__Legionellaceae; g__Legionella
OTU_2046	0	0	0	1	4	0	0	0	0	0	0	1	0	1	0	0	0	1	0	2	0	0	1	0	0	6	0	0	0	1	3	1	0	2	2	2	3	4	0	3	3	1	0	0	0	d__Bacteria; p__Proteobacteria; c__Gammaproteobacteria; o__Diplorickettsiales; f__Diplorickettsiaceae; g__uncultured; s__uncultured_Coxiellaceae_bacterium
OTU_2048	2	0	0	1	0	0	2	0	0	0	0	0	0	0	0	0	0	0	0	0	0	0	0	0	0	0	0	0	0	0	0	0	0	0	0	0	0	0	0	0	0	0	0	0	0	d__Bacteria; p__Actinobacteria; c__Actinobacteria; o__Micromonosporales; f__Micromonosporaceae; g__Phytomonospora
OTU_2049	0	0	0	0	0	0	0	0	0	1	0	0	2	1	0	0	0	0	0	0	0	1	0	1	0	0	0	0	0	0	0	0	1	6	6	1	12	3	0	1	0	2	0	1	0	Unclassified
OTU_205	16	64	20	1	21	21	15	4	6	58	12	9	123	48	22	275	241	178	42	153	90	31	5	56	43	54	29	59	29	27	25	16	10	72	25	45	43	36	76	47	335	93	33	50	45	d__Bacteria; p__Actinobacteria; c__Actinobacteria; o__Micrococcales; f__Microbacteriaceae
OTU_2051	1	2	0	1	3	1	1	2	0	3	8	3	2	0	0	0	0	0	1	0	1	0	1	0	1	0	2	0	0	0	0	1	0	0	0	1	0	0	0	0	2	0	0	2	0	d__Bacteria; p__Proteobacteria; c__Alphaproteobacteria; o__Acetobacterales; f__Acetobacteraceae; g__Craurococcus; s__uncultured_bacterium
OTU_2052	0	0	4	0	1	2	1	0	4	1	1	0	1	1	2	0	0	0	0	0	0	0	0	0	0	0	0	0	0	0	0	0	0	0	0	0	0	0	0	0	0	0	0	0	0	d__Bacteria; p__Gemmatimonadetes; c__BD2_11_terrestrial_group; o__BD2_11_terrestrial_group_or; f__BD2_11_terrestrial_group_fa; g__BD2_11_terrestrial_group_ge; s__uncultured_soil_bacterium
OTU_2053	6	0	0	0	0	0	0	0	0	0	0	0	0	0	0	0	0	0	0	0	0	0	0	0	0	0	0	0	0	0	0	0	0	0	0	0	0	0	0	0	0	0	0	0	0	d__Bacteria; p__Proteobacteria
OTU_2054	1	1	0	0	0	0	0	0	1	0	1	0	0	0	2	0	0	0	0	1	0	0	0	0	0	0	0	0	0	0	0	0	0	0	1	0	0	0	0	0	0	0	0	0	0	d__Bacteria; p__Planctomycetes; c__OM190; o__OM190_or; f__OM190_fa; g__OM190_ge; s__uncultured_Planctomycetales_bacterium
OTU_2055	1	1	1	1	1	1	0	1	4	3	1	0	1	0	0	0	0	0	1	0	0	0	0	0	0	0	0	0	0	0	0	0	0	0	0	0	0	0	0	0	1	0	0	0	0	d__Bacteria; p__Planctomycetes; c__Planctomycetacia; o__Gemmatales; f__Gemmataceae; g__Gemmata
OTU_2056	0	0	0	1	0	0	2	1	0	3	0	0	1	1	0	0	0	0	1	0	0	0	0	0	0	0	0	0	0	0	0	0	0	0	0	0	0	0	0	0	0	0	0	0	0	d__Bacteria; p__Bacteroidetes; c__Bacteroidia; o__Cytophagales
OTU_2057	0	0	0	0	0	0	0	1	0	0	0	0	0	0	0	0	0	0	0	0	0	6	1	0	0	0	0	0	0	0	0	0	0	0	0	1	10	0	1	5	1	0	2	0	5	d__Bacteria; p__Armatimonadetes; c__Fimbriimonadia; o__Fimbriimonadales; f__Fimbriimonadaceae; g__Fimbriimonadaceae_ge
OTU_2059	0	1	0	0	1	1	3	2	4	6	2	0	1	0	2	6	1	6	1	2	1	0	0	0	1	0	0	0	0	1	2	0	0	0	0	21	0	0	0	1	1	0	0	1	0	d__Bacteria; p__Bacteroidetes; c__Bacteroidia; o__Sphingobacteriales; f__Sphingobacteriaceae
OTU_206	1	0	0	0	0	1	0	0	0	0	0	0	0	0	0	0	0	0	0	0	0	0	0	0	0	0	2	0	0	0	160	115	147	65	48	31	337	388	54	10	152	199	46	53	67	d__Bacteria
OTU_2060	0	6	1	0	5	3	1	0	0	0	0	0	1	0	0	0	0	0	0	0	0	0	0	0	0	0	0	0	0	0	0	0	0	0	0	0	0	0	0	0	0	0	0	0	0	d__Bacteria; p__Firmicutes; c__Negativicutes; o__Selenomonadales; f__Acidaminococcaceae; g__Phascolarctobacterium; s__gut_metagenome
OTU_2061	0	2	0	0	0	0	0	1	2	4	2	0	1	0	0	0	0	0	0	0	0	0	0	0	0	0	0	0	1	0	0	0	0	0	0	0	0	0	0	0	0	0	0	0	0	d__Bacteria; p__Planctomycetes; c__Phycisphaerae; o__Tepidisphaerales; f__WD2101_soil_group; g__WD2101_soil_group_ge; s__uncultured_planctomycete
OTU_2062	0	0	0	0	0	0	0	0	0	0	0	0	0	0	0	0	0	0	0	0	0	0	0	0	2	0	0	0	0	0	16	8	39	2	0	0	0	0	6	0	0	5	0	0	0	d__Bacteria; p__Bacteroidetes; c__Bacteroidia; o__Sphingobacteriales; f__Sphingobacteriaceae
OTU_2064	0	0	0	0	0	0	0	1	2	0	0	1	3	0	0	0	0	0	2	0	0	0	0	0	0	0	0	0	0	0	0	0	0	0	0	0	0	1	0	0	0	0	0	0	0	d__Bacteria; p__Chloroflexi; c__Anaerolineae; o__SBR1031; f__A4b; g__A4b_ge; s__uncultured_sludge_bacterium_S14
OTU_2066	0	1	1	0	0	0	0	1	5	1	0	0	0	0	1	0	0	0	0	0	0	0	0	0	0	0	0	0	0	0	0	0	0	0	0	0	0	0	0	0	0	0	0	0	0	d__Bacteria; p__Proteobacteria; c__Alphaproteobacteria; o__Tistrellales; f__Geminicoccaceae; g__Candidatus_Alysiosphaera
OTU_2067	0	1	0	0	0	0	1	0	2	0	0	0	0	0	0	0	0	0	11	0	3	0	0	1	4	0	1	0	0	0	0	0	0	0	0	0	0	0	0	0	0	0	0	0	0	d__Bacteria; p__Acidobacteria; c__Subgroup_6; o__Subgroup_6_or; f__Subgroup_6_fa; g__Subgroup_6_ge
OTU_2068	0	0	0	0	0	0	0	0	0	0	0	0	0	0	0	0	0	0	0	0	0	0	0	0	0	0	0	0	0	0	85	215	123	11	9	5	7	9	19	97	109	47	2	1	6	d__Bacteria; p__Proteobacteria; c__Alphaproteobacteria; o__Rhizobiales; f__Beijerinckiaceae; g__1174_901_12; s__uncultured_bacterium
OTU_2069	0	0	2	1	0	3	2	5	3	2	1	1	0	2	1	0	0	0	0	0	0	0	0	0	2	0	0	0	0	0	0	0	0	0	0	0	0	0	0	0	0	0	0	0	0	d__Bacteria; p__Gemmatimonadetes; c__Gemmatimonadetes; o__Gemmatimonadales; f__Gemmatimonadaceae
OTU_207	1	2	0	1	2	1	5	0	0	41	141	14	1	9	5	7	3	5	14	12	140	42	82	48	21	12	276	123	4	18	1	2	0	0	0	0	4	0	0	0	0	0	0	16	13	Unclassified
OTU_2070	0	0	0	0	1	2	1	1	1	2	1	0	2	0	0	0	0	0	0	0	0	0	0	0	0	0	0	0	0	0	0	0	0	0	0	0	0	0	0	0	0	0	0	0	0	d__Bacteria; p__Actinobacteria; c__Acidimicrobiia; o__Microtrichales; f__Microtrichaceae; g__uncultured; s__uncultured_bacterium
OTU_2071	0	0	0	0	1	0	3	2	0	0	1	1	0	0	0	0	0	0	0	0	0	0	0	0	0	0	0	0	0	0	0	0	0	0	0	0	0	0	0	0	0	0	0	0	0	d__Bacteria; p__Proteobacteria; c__Deltaproteobacteria; o__Myxococcales; f__Sandaracinaceae; g__Sandaracinus; s__uncultured_bacterium
OTU_2072	1	0	0	0	0	1	1	1	1	2	1	0	1	0	0	0	0	0	0	0	1	0	0	0	0	0	0	0	0	0	0	0	0	0	0	0	0	0	0	0	0	0	0	0	0	d__Bacteria; p__Planctomycetes; c__Planctomycetacia; o__Gemmatales; f__Gemmataceae; g__uncultured; s__uncultured_bacterium
OTU_2073	0	0	0	0	1	0	0	1	1	1	0	0	0	0	0	0	0	0	3	0	0	0	0	0	0	0	0	0	0	0	0	0	0	0	0	0	0	0	0	0	0	1	0	0	0	d__Bacteria; p__Planctomycetes; c__Planctomycetacia; o__Pirellulales; f__Pirellulaceae; g__Pirellula; s__uncultured_bacterium
OTU_2074	1	0	0	0	1	1	1	0	2	0	0	0	1	0	1	0	0	0	2	0	0	0	0	0	0	0	0	0	0	0	0	0	0	0	0	0	1	0	0	0	0	0	0	0	0	d__Bacteria; p__Proteobacteria; c__Deltaproteobacteria; o__Myxococcales; f__Haliangiaceae; g__Haliangium
OTU_2075	1	2	0	0	4	1	1	3	3	0	0	1	2	0	0	0	0	0	0	0	1	0	0	0	0	0	0	0	0	0	0	0	0	0	0	0	0	0	0	0	0	0	0	0	0	d__Bacteria; p__Chloroflexi; c__TK10; o__TK10_or; f__TK10_fa; g__TK10_ge; s__uncultured_Chloroflexi_bacterium
OTU_2077	0	1	2	3	2	2	2	2	1	0	1	4	1	0	0	0	0	0	8	1	0	0	0	0	2	0	0	0	0	0	0	1	0	0	0	0	0	1	0	0	0	0	0	0	0	d__Bacteria; p__Bacteroidetes; c__Bacteroidia; o__Chitinophagales; f__Chitinophagaceae
OTU_2078	1	1	0	0	1	2	0	4	1	0	1	1	0	1	0	0	0	0	0	0	0	0	0	0	0	0	0	0	0	0	0	0	0	0	0	0	0	0	0	0	0	0	0	0	0	d__Bacteria; p__Chloroflexi; c__Chloroflexia; o__Kallotenuales; f__AKIW781; g__AKIW781_ge
OTU_2079	0	0	4	0	0	0	0	0	0	0	0	0	0	0	0	0	0	0	0	0	0	0	0	0	0	0	0	0	0	0	0	0	0	0	0	0	0	0	0	0	0	0	0	0	0	Unclassified
OTU_208	4	24	29	7	12	11	13	5	4	24	20	12	5	16	7	1	1	19	0	1	2	0	0	2	4	3	1	0	1	1	21	137	2	10	1	4	26	11	18	28	8	12	19	97	79	d__Bacteria; p__Actinobacteria; c__Thermoleophilia; o__Solirubrobacterales; f__Solirubrobacteraceae; g__Patulibacter; s__Patulibacter_minatonensis
OTU_2081	1	1	0	0	0	0	0	1	3	0	0	0	1	3	0	0	0	0	1	0	0	0	0	0	0	0	0	0	0	0	0	0	0	0	10	0	0	0	0	0	0	0	0	0	0	d__Bacteria; p__Chloroflexi; c__Chloroflexia; o__Chloroflexales; f__Roseiflexaceae; g__uncultured
OTU_2082	0	0	0	0	0	0	0	0	1	0	0	0	0	0	0	0	0	0	2	2	3	0	0	0	1	0	2	0	0	0	0	0	0	1	0	0	0	0	0	0	0	0	0	0	0	d__Bacteria; p__Planctomycetes; c__Phycisphaerae; o__Tepidisphaerales; f__WD2101_soil_group; g__WD2101_soil_group_ge
OTU_2083	1	0	0	0	1	1	3	3	1	2	1	1	1	1	0	0	0	0	1	0	1	0	0	0	0	0	0	0	0	0	0	0	0	0	0	0	0	0	0	0	0	0	0	0	0	d__Bacteria; p__Proteobacteria; c__Gammaproteobacteria; o__Betaproteobacteriales; f__SC_I_84; g__SC_I_84_ge
OTU_2084	0	0	0	0	2	0	1	0	3	1	0	0	0	1	0	0	0	0	0	0	0	0	0	0	0	0	0	0	0	0	0	0	0	0	0	0	0	0	0	0	0	0	0	0	0	d__Bacteria
OTU_2085	0	0	0	0	0	0	0	4	3	0	1	1	0	1	0	0	0	0	0	0	0	0	0	0	0	0	0	0	0	0	0	0	0	0	0	0	0	0	0	0	0	0	0	0	0	d__Bacteria; p__Gemmatimonadetes; c__Longimicrobia; o__Longimicrobiales; f__Longimicrobiaceae; g__Longimicrobiaceae_ge
OTU_2086	0	0	0	0	2	2	1	0	1	1	1	0	1	0	1	0	0	0	0	0	0	0	0	0	0	0	0	0	0	0	0	0	0	0	0	0	0	0	0	0	0	0	0	0	0	d__Bacteria; p__Chloroflexi; c__Chloroflexia; o__Kallotenuales
OTU_2087	0	1	0	1	0	0	2	1	3	1	0	0	0	0	0	0	0	0	0	0	0	0	0	0	0	0	0	0	0	0	0	0	0	0	0	0	0	0	0	0	0	0	0	0	0	d__Bacteria
OTU_2088	0	0	0	0	2	0	1	3	0	3	0	1	1	3	1	0	0	0	0	0	0	0	0	0	0	0	0	0	0	0	0	0	0	0	0	0	0	0	0	0	0	0	0	0	0	d__Bacteria; p__Bacteroidetes; c__Bacteroidia; o__Chitinophagales; f__Chitinophagaceae; g__Niastella; s__uncultured_bacterium
OTU_2089	2	2	0	2	3	7	1	0	1	2	1	0	4	1	0	396	549	332	44	48	277	283	245	90	87	128	94	161	413	669	1967	2635	741	2495	971	1166	1877	2392	405	2684	4250	3647	1137	2507	2230	d__Bacteria; p__Proteobacteria; c__Alphaproteobacteria; o__Rhizobiales; f__Beijerinckiaceae; g__Methylobacterium
OTU_2090	1	1	2	0	0	1	2	1	1	2	1	1	2	0	0	0	0	0	28	3	13	2	0	0	21	2	5	0	0	2	2	0	0	0	0	0	0	2	0	1	2	0	0	0	0	d__Bacteria; p__Proteobacteria; c__Alphaproteobacteria; o__Tistrellales; f__Geminicoccaceae; g__Candidatus_Alysiosphaera; s__metagenome
OTU_2093	0	0	0	0	1	1	0	0	0	1	0	1	1	0	0	0	0	0	0	0	0	0	0	0	0	0	0	0	0	0	0	0	0	0	0	0	0	0	0	0	0	0	0	0	0	d__Bacteria; p__Patescibacteria; c__Saccharimonadia; o__Saccharimonadales; f__Saccharimonadales_fa; g__Saccharimonadales_ge
OTU_2094	1	7	0	0	0	0	0	0	0	0	0	0	0	0	0	0	0	0	0	0	0	0	0	0	0	0	0	0	0	0	0	0	0	0	0	0	0	0	0	0	0	0	0	0	0	d__Bacteria; p__Firmicutes; c__Clostridia; o__Clostridiales; f__Lachnospiraceae
OTU_2095	0	0	1	0	0	0	1	3	1	1	1	2	1	0	1	0	0	0	1	0	0	0	0	0	0	0	0	0	0	0	0	0	0	0	0	0	0	0	0	0	0	0	0	0	0	d__Bacteria; p__Actinobacteria; c__Acidimicrobiia; o__Microtrichales; f__Ilumatobacteraceae; g__uncultured; s__uncultured_bacterium
OTU_2096	3	6	16	1	6	9	10	0	0	18	8	1	6	9	8	111	53	41	291	89	266	504	684	107	104	115	82	336	160	343	112	149	166	53	2	25	16	40	87	12	43	18	17	26	19	d__Bacteria; p__Bacteroidetes; c__Bacteroidia; o__Cytophagales; f__Hymenobacteraceae; g__Hymenobacter
OTU_2097	3	1	0	2	1	0	0	0	0	2	3	0	1	0	0	0	0	0	0	0	0	0	0	0	0	0	0	0	0	0	0	0	0	0	0	0	0	0	0	0	0	0	0	0	0	d__Bacteria; p__Proteobacteria; c__Alphaproteobacteria; o__Azospirillales; f__Azospirillaceae; g__Skermanella
OTU_2098	1	0	0	0	0	0	0	0	0	3	0	3	0	0	0	0	0	0	0	0	0	0	0	0	0	0	0	0	0	0	0	0	0	0	0	0	0	0	0	0	0	0	0	0	0	d__Bacteria; p__Bacteroidetes; c__Bacteroidia; o__Cytophagales
OTU_2099	0	1	1	0	0	0	1	1	3	0	2	0	0	0	3	0	0	0	0	0	0	0	0	0	0	0	0	0	0	0	0	0	0	0	0	0	0	0	0	0	0	0	0	0	0	d__Bacteria; p__Gemmatimonadetes; c__Longimicrobia; o__Longimicrobiales; f__Longimicrobiaceae; g__Longimicrobiaceae_ge
OTU_210	30	20	23	22	13	15	40	48	50	28	22	14	20	14	8	0	0	0	1	0	0	0	0	0	0	0	1	0	0	0	0	0	0	0	0	0	0	0	0	0	0	0	0	0	0	d__Bacteria; p__Gemmatimonadetes; c__Gemmatimonadetes; o__Gemmatimonadales; f__Gemmatimonadaceae; g__uncultured; s__uncultured_soil_bacterium
OTU_2100	0	1	1	0	1	0	3	2	0	2	2	1	1	0	1	0	0	0	0	0	0	0	0	0	0	0	0	0	0	0	0	0	0	0	0	0	0	0	0	0	0	0	0	0	0	d__Bacteria
OTU_2101	0	0	0	0	0	0	0	0	0	0	0	0	0	0	0	0	0	0	0	0	0	0	0	0	0	0	0	0	0	0	2	20	9	0	35	2	0	0	1	3	0	3	0	0	0	d__Bacteria
OTU_2102	0	2	2	0	2	0	1	2	2	1	1	0	0	0	0	0	0	0	1	0	0	0	0	0	1	0	0	0	0	0	0	0	0	0	0	0	0	0	0	0	0	0	0	0	0	d__Bacteria; p__Chloroflexi; c__Anaerolineae; o__SBR1031; f__A4b; g__A4b_ge
OTU_2103	1	0	2	1	0	1	0	1	3	2	1	0	2	0	0	0	0	0	0	0	0	0	0	0	0	0	0	0	0	0	0	0	0	0	0	0	0	0	0	0	0	0	0	0	0	d__Bacteria; p__Proteobacteria; c__Alphaproteobacteria; o__Rhizobiales; f__Xanthobacteraceae; g__Starkeya; s__Starkeya_novella
OTU_2104	0	0	0	0	0	1	1	1	3	1	0	1	0	0	0	0	0	0	3	0	0	0	0	0	0	0	0	0	0	0	0	0	0	0	0	0	0	0	0	0	0	0	0	0	0	d__Bacteria; p__Patescibacteria
OTU_2105	1	1	0	1	0	0	1	0	0	0	1	0	0	0	0	0	0	0	0	0	0	0	0	0	0	0	0	0	0	0	0	0	0	0	0	0	0	4	0	1	0	0	0	0	0	d__Bacteria; p__Firmicutes; c__Bacilli; o__Bacillales; f__Staphylococcaceae; g__Jeotgalicoccus; s__uncultured_bacterium
OTU_2106	0	8	1	0	0	0	0	0	0	0	0	0	0	0	0	0	0	0	0	0	0	0	0	0	0	0	0	0	0	0	0	0	0	0	0	0	0	0	0	0	0	0	0	0	0	d__Bacteria; p__Firmicutes; c__Erysipelotrichia; o__Erysipelotrichales; f__Erysipelotrichaceae; g__Erysipelothrix
OTU_2107	0	2	1	0	0	0	0	3	0	2	0	3	2	1	0	0	0	0	0	0	0	0	0	0	0	0	0	0	0	0	0	0	0	0	0	0	0	0	0	0	0	0	0	0	0	d__Bacteria; p__Proteobacteria; c__Alphaproteobacteria; o__Tistrellales; f__Geminicoccaceae; g__uncultured
OTU_2108	0	0	0	1	0	0	1	0	0	1	0	0	0	0	0	0	0	0	0	0	0	4	0	0	0	0	0	0	0	0	0	0	0	0	0	0	0	0	0	0	0	0	0	0	0	d__Bacteria
OTU_2109	0	1	0	0	0	0	1	1	2	0	0	1	0	0	0	0	0	0	0	0	0	0	0	0	0	0	0	0	0	0	0	0	0	0	0	0	0	0	0	0	0	0	0	0	0	d__Bacteria; p__Planctomycetes; c__Phycisphaerae; o__Phycisphaerales; f__Phycisphaeraceae; g__I_8; s__uncultured_bacterium
OTU_211	0	0	0	0	0	0	0	0	0	0	0	0	0	0	0	0	0	0	0	0	152	0	0	128	0	1201	73	0	0	0	0	0	0	0	0	0	0	0	0	0	0	0	0	0	0	d__Bacteria; p__Proteobacteria; c__Gammaproteobacteria; o__Betaproteobacteriales; f__Burkholderiaceae; g__Burkholderia_Caballeronia_Paraburkholderia; s__Candidatus_Vallotia_tarda
OTU_2110	0	0	0	0	0	0	0	0	0	0	0	0	0	0	0	0	0	0	0	0	0	0	0	0	0	0	0	0	0	0	24	0	0	0	0	0	0	0	0	0	0	2	0	0	0	d__Bacteria; p__Bacteroidetes; c__Bacteroidia; o__Sphingobacteriales; f__Sphingobacteriaceae
OTU_2111	0	0	0	0	2	0	2	0	2	0	1	0	2	1	0	0	0	0	1	0	0	0	0	0	0	0	0	0	0	0	0	0	0	0	0	0	0	0	0	0	0	0	0	0	0	d__Bacteria; p__Proteobacteria; c__Deltaproteobacteria; o__Myxococcales; f__27F_1492R; g__27F_1492R_ge; s__uncultured_bacterium
OTU_2112	0	0	0	1	0	3	0	0	0	1	0	0	1	0	0	0	0	0	0	0	0	0	0	0	0	0	1	0	0	1	0	0	0	0	0	0	0	0	0	0	0	0	0	0	0	Unclassified
OTU_2113	1	1	3	0	1	0	1	0	10	3	2	1	0	1	0	0	0	0	0	0	0	0	0	0	0	0	0	0	0	0	0	1	0	0	0	0	0	0	0	0	0	0	0	0	0	d__Bacteria; p__Bacteroidetes; c__Bacteroidia; o__Cytophagales; f__Microscillaceae; g__Ohtaekwangia; s__metagenome
OTU_2114	0	0	0	0	0	1	4	1	1	0	1	1	1	1	2	0	0	0	0	0	0	0	0	0	0	0	0	0	0	0	0	0	0	0	0	0	0	0	0	0	0	0	0	0	0	d__Bacteria; p__Gemmatimonadetes; c__Longimicrobia; o__Longimicrobiales; f__Longimicrobiaceae; g__Longimicrobiaceae_ge; s__uncultured_bacterium
OTU_2115	1	0	0	0	0	0	0	0	0	0	10	0	1	0	0	0	0	58	0	0	70	5	69	0	0	0	109	19	24	42	0	66	0	0	0	0	12	7	57	3	0	0	337	184	140	d__Bacteria; p__Proteobacteria; c__Deltaproteobacteria; o__Myxococcales; f__Archangiaceae
OTU_2116	0	3	2	0	1	2	6	2	7	3	1	0	1	1	1	0	0	0	5	2	0	0	0	0	3	1	3	0	0	0	0	0	1	0	1	0	0	0	0	0	0	0	0	1	0	d__Bacteria; p__Chloroflexi; c__KD4_96; o__KD4_96_or; f__KD4_96_fa; g__KD4_96_ge
OTU_2117	0	0	0	0	0	0	0	0	0	0	0	0	0	0	0	0	0	0	0	0	0	0	0	0	0	0	0	0	0	0	2	0	8	0	0	0	0	0	0	3	15	0	0	0	0	d__Bacteria; p__Proteobacteria; c__Alphaproteobacteria; o__Azospirillales; f__Inquilinaceae; g__Inquilinus; s__uncultured_alpha_proteobacterium
OTU_2118	0	1	0	0	0	0	4	1	2	0	1	0	0	0	0	0	0	0	0	0	0	0	0	0	0	0	0	0	0	0	0	0	0	0	0	0	0	0	0	0	0	0	0	0	0	d__Bacteria; p__Bacteroidetes; c__Bacteroidia; o__Bacteroidetes_VC2.1_Bac22; f__Bacteroidetes_VC2.1_Bac22_fa; g__Bacteroidetes_VC2.1_Bac22_ge; s__metagenome
OTU_2119	1	1	0	1	0	0	2	2	2	0	1	1	4	1	1	0	0	0	1	0	0	0	0	0	0	0	0	0	0	0	0	0	0	0	0	0	0	0	0	0	0	0	0	0	0	d__Bacteria; p__Nitrospirae; c__Nitrospira; o__Nitrospirales; f__Nitrospiraceae; g__Nitrospira; s__uncultured_Nitrospira_sp.
OTU_212	0	0	0	0	0	0	0	0	0	0	0	0	0	0	0	0	0	0	0	0	0	0	0	0	0	0	1	0	0	0	18	11	43	122	115	495	112	240	9	189	94	322	1	48	160	d__Bacteria
OTU_2120	0	0	3	0	1	1	1	1	2	0	1	1	0	1	1	0	0	0	1	0	0	0	0	0	0	0	0	0	0	0	0	0	0	0	4	0	0	0	0	0	0	0	0	0	0	d__Bacteria; p__Gemmatimonadetes; c__Gemmatimonadetes; o__Gemmatimonadales; f__Gemmatimonadaceae
OTU_2121	0	0	0	0	0	0	1	0	0	0	0	0	0	0	0	81	29	25	0	1	8	9	6	5	1	2	10	65	33	0	0	3	11	2	0	0	6	13	1	1	5	2	2	25	14	d__Bacteria; p__Bacteroidetes; c__Bacteroidia; o__Cytophagales; f__Spirosomaceae; g__Spirosoma
OTU_2128	1	0	0	0	0	0	0	1	1	0	0	1	0	0	0	0	0	0	0	0	0	0	0	0	0	0	0	0	0	0	0	0	0	0	0	0	0	0	0	0	0	0	0	0	0	d__Bacteria; p__Planctomycetes; c__Phycisphaerae; o__Tepidisphaerales; f__WD2101_soil_group; g__WD2101_soil_group_ge
OTU_2129	0	1	0	0	0	0	3	0	2	1	0	2	5	1	1	0	0	0	8	0	0	0	0	0	1	0	0	0	0	0	0	0	0	0	0	0	0	0	0	0	0	0	0	0	0	d__Bacteria; p__Proteobacteria; c__Alphaproteobacteria; o__Reyranellales; f__Reyranellaceae; g__Reyranella; s__metagenome
OTU_213	40	31	17	32	18	12	37	75	92	75	36	21	58	9	17	1	0	0	8	0	5	1	1	0	5	1	2	0	0	2	0	0	0	0	4	0	1	0	0	3	2	0	0	1	0	d__Bacteria; p__Actinobacteria; c__Actinobacteria; o__Propionibacteriales; f__Nocardioidaceae; g__Kribbella; s__metagenome
OTU_2130	1	0	2	0	0	1	0	0	2	1	3	0	1	0	0	0	0	0	0	0	0	0	0	0	0	2	0	0	0	0	0	0	0	0	0	0	0	0	0	0	0	1	0	0	0	d__Bacteria; p__Actinobacteria; c__Acidimicrobiia; o__Microtrichales
OTU_2131	0	0	0	9	0	0	0	0	0	0	0	0	0	0	0	0	0	0	0	0	0	0	0	0	0	0	0	0	0	0	0	0	0	0	0	0	0	0	0	0	0	0	0	0	0	Unclassified
OTU_2134	0	0	0	0	0	0	0	0	0	0	0	0	0	0	0	0	0	0	0	0	0	0	0	0	0	0	0	0	0	0	0	0	0	46	0	0	0	0	0	0	0	0	1	1	0	d__Bacteria; p__Chlamydiae; c__Chlamydiae; o__Chlamydiales; f__Parachlamydiaceae; g__Candidatus_Protochlamydia; s__metagenome
OTU_2135	0	5	8	0	1	4	3	6	1	0	0	0	0	0	0	0	0	0	0	0	0	0	0	0	0	0	0	0	0	0	0	0	0	0	0	0	0	0	0	0	0	0	0	0	0	d__Bacteria; p__Bacteroidetes; c__Bacteroidia; o__Bacteroidales; f__Bacteroidaceae; g__Bacteroides; s__Bacteroides_uniformis
OTU_2136	0	0	0	0	0	0	0	0	0	0	0	0	0	0	0	0	0	0	0	0	0	0	0	0	0	1	0	0	0	0	0	5	16	0	1	0	1	3	0	0	2	1	0	0	0	d__Bacteria; p__Planctomycetes; c__Planctomycetacia; o__Isosphaerales; f__Isosphaeraceae; g__Singulisphaera
OTU_2137	1	0	1	0	0	1	1	8	0	1	0	1	0	0	0	0	0	0	0	0	0	0	0	0	0	0	0	0	0	0	0	0	0	0	0	0	0	0	0	0	0	0	0	0	0	d__Bacteria; p__Bacteroidetes; c__Bacteroidia; o__Chitinophagales; f__uncultured; g__uncultured_ge; s__metagenome
OTU_2140	0	0	1	0	0	0	2	1	0	0	0	0	0	0	0	0	0	0	24	2	0	0	0	0	0	0	0	0	0	0	0	0	0	0	0	0	0	0	0	0	0	0	0	0	0	d__Bacteria; p__Proteobacteria; c__Gammaproteobacteria; o__Pseudomonadales; f__Pseudomonadaceae
OTU_2141	0	0	0	0	3	1	1	1	0	0	2	0	1	2	0	0	0	0	0	0	0	0	0	0	0	0	0	0	0	0	0	0	0	0	0	0	0	0	0	0	0	0	0	0	0	d__Bacteria; p__Gemmatimonadetes; c__S0134_terrestrial_group; o__S0134_terrestrial_group_or; f__S0134_terrestrial_group_fa; g__S0134_terrestrial_group_ge; s__uncultured_bacterium
OTU_2142	1	2	2	2	1	1	1	0	5	2	4	3	0	1	0	1	0	0	11	2	1	0	0	0	2	0	1	0	1	0	0	0	0	0	0	0	0	0	0	0	0	0	0	0	0	d__Bacteria; p__Proteobacteria; c__Gammaproteobacteria; o__Steroidobacterales; f__Steroidobacteraceae; g__uncultured; s__uncultured_Steroidobacter_sp.
OTU_2143	0	1	2	0	0	1	0	1	0	2	1	0	1	1	1	0	0	0	1	0	0	0	0	0	0	0	0	0	0	0	0	0	0	0	0	0	0	0	0	0	0	0	0	0	0	d__Bacteria; p__Verrucomicrobia; c__Verrucomicrobiae; o__Pedosphaerales; f__Pedosphaeraceae
OTU_2144	0	0	1	0	0	1	1	0	0	0	1	1	1	1	0	0	0	1	0	0	0	0	0	0	0	0	0	0	0	0	0	0	0	0	0	0	0	0	0	0	0	0	0	0	0	d__Bacteria; p__Firmicutes; c__Clostridia; o__Clostridiales; f__Clostridiaceae_1; g__Clostridium_sensu_stricto_1
OTU_2145	0	0	2	0	0	0	0	0	0	1	2	0	1	0	0	0	0	0	2	0	0	0	0	0	0	0	3	0	0	0	0	0	0	0	0	0	0	0	0	0	0	0	0	0	0	d__Bacteria; p__Planctomycetes; c__Planctomycetacia; o__Gemmatales; f__Gemmataceae; g__Gemmata; s__uncultured_bacterium
OTU_2146	0	0	0	0	0	0	1	0	0	0	0	0	0	0	0	0	0	0	8	1	0	2	0	0	1	1	2	0	0	0	0	0	0	0	0	0	0	0	0	0	0	0	0	0	0	d__Bacteria; p__Proteobacteria; c__Gammaproteobacteria; o__Betaproteobacteriales; f__Nitrosomonadaceae; g__966_1; s__uncultured_beta_proteobacterium
OTU_2148	1	1	0	0	0	0	2	3	4	3	0	0	1	0	0	0	0	0	0	0	0	0	0	0	0	0	0	0	0	0	0	0	0	0	0	0	0	0	0	0	0	0	0	0	0	d__Bacteria; p__FBP; c__FBP_cl; o__FBP_or; f__FBP_fa; g__FBP_ge; s__uncultured_bacterium
OTU_2149	0	1	2	1	1	1	0	0	1	0	0	0	0	0	0	0	0	0	0	0	0	0	0	0	0	0	0	0	0	0	0	0	0	0	0	0	0	0	0	0	0	0	0	0	0	d__Bacteria; p__Gemmatimonadetes; c__Gemmatimonadetes; o__Gemmatimonadales; f__Gemmatimonadaceae; g__uncultured
OTU_215	0	1	0	0	0	0	0	0	0	0	0	0	0	0	0	1	0	0	0	1	0	0	4	0	0	0	1	0	0	0	181	112	199	144	283	101	25	76	11	109	66	73	0	5	0	d__Bacteria; p__Proteobacteria; c__Alphaproteobacteria; o__Acetobacterales; f__Acetobacteraceae
OTU_2150	1	1	0	0	1	0	1	0	3	0	0	0	1	0	0	0	0	0	0	0	0	0	0	0	0	0	0	0	0	0	0	0	0	0	0	0	0	0	0	0	0	0	0	0	0	d__Bacteria; p__Planctomycetes; c__Planctomycetacia; o__Gemmatales; f__Gemmataceae; g__uncultured; s__uncultured_bacterium
OTU_2151	0	3	0	1	3	1	1	3	3	0	1	0	2	1	0	0	0	0	0	0	0	0	0	0	0	0	0	0	0	0	0	0	0	0	0	0	0	0	0	0	0	0	0	0	0	d__Bacteria; p__Actinobacteria; c__MB_A2_108; o__MB_A2_108_or; f__MB_A2_108_fa; g__MB_A2_108_ge; s__uncultured_bacterium
OTU_2152	21	11	5	17	20	5	3	6	0	10	14	25	15	10	7	0	2	32	3	2	7	8	3	0	0	1	10	2	3	53	83	106	9	9	10	24	17	11	45	18	37	31	213	54	141	d__Bacteria; p__Proteobacteria; c__Alphaproteobacteria; o__Sphingomonadales; f__Sphingomonadaceae; g__Sphingomonas
OTU_2153	0	0	1	0	0	1	5	0	2	1	0	1	1	0	1	0	0	0	8	0	0	0	0	0	0	0	0	0	0	0	0	0	0	0	0	0	0	0	0	0	0	0	0	0	0	d__Bacteria; p__Acidobacteria; c__Acidobacteriia; o__Solibacterales; f__Solibacteraceae_Subgroup_3; g__Paludibaculum; s__metagenome
OTU_2154	0	0	0	1	0	0	4	0	4	2	0	0	1	0	0	0	0	0	0	0	1	0	0	0	0	0	1	0	0	0	0	0	0	0	0	0	0	0	0	0	0	0	0	1	1	d__Bacteria; p__Planctomycetes; c__Phycisphaerae; o__Tepidisphaerales; f__WD2101_soil_group; g__WD2101_soil_group_ge; s__uncultured_planctomycete
OTU_2156	0	0	0	1	0	0	1	1	1	5	0	1	1	0	3	1	0	0	3	0	0	0	0	0	1	0	2	0	0	0	0	0	0	0	0	0	0	0	0	0	0	0	0	0	0	d__Bacteria; p__Actinobacteria; c__Acidimicrobiia; o__Microtrichales; f__Iamiaceae; g__Iamia
OTU_2157	2	0	0	0	0	0	0	0	5	1	0	1	1	1	0	0	0	0	0	0	0	0	0	0	0	0	0	0	0	0	0	0	0	0	0	0	0	0	0	0	0	0	0	0	0	d__Bacteria; p__Proteobacteria; c__Gammaproteobacteria; o__Betaproteobacteriales
OTU_2158	0	1	0	1	0	3	2	3	2	1	3	1	0	0	1	0	0	0	1	0	0	0	0	0	0	0	0	0	0	0	0	0	0	0	0	0	0	0	0	0	0	0	0	0	0	d__Bacteria; p__Chloroflexi; c__Anaerolineae; o__SBR1031; f__A4b; g__A4b_ge; s__uncultured_bacterium
OTU_2159	0	0	0	0	0	0	0	0	0	0	0	0	0	0	0	0	1	0	13	16	2	1	5	6	32	6	0	1	1	0	0	0	0	0	0	0	0	0	0	0	0	0	0	0	0	Unclassified
OTU_216	6	41	17	14	11	12	14	11	9	25	16	16	36	47	10	3	0	196	17	3	6	2	1	1	1	1	3	0	1	5	1	2	0	1	0	3	0	1	0	9	1	0	3	47	6	d__Bacteria; p__Actinobacteria; c__Actinobacteria; o__Propionibacteriales; f__Nocardioidaceae; g__Nocardioides
OTU_2160	1	2	1	2	2	1	2	0	3	3	0	1	0	1	0	0	0	0	0	0	0	0	0	0	0	0	0	0	0	0	0	0	0	0	0	0	0	0	0	0	0	0	0	0	0	d__Bacteria; p__Chloroflexi; c__Anaerolineae; o__SBR1031; f__SBR1031_fa; g__SBR1031_ge; s__uncultured_soil_bacterium
OTU_2161	0	0	0	1	0	0	0	3	1	0	0	0	0	0	0	0	0	0	0	0	0	0	0	0	0	0	0	0	0	0	0	0	0	0	0	0	0	0	0	0	0	0	0	0	0	d__Bacteria; p__Bacteroidetes; c__Bacteroidia; o__Cytophagales
OTU_2164	1	3	2	1	3	3	8	2	7	4	1	1	1	0	3	0	1	0	2	1	0	0	0	0	0	0	0	0	0	0	0	0	0	0	0	0	0	0	0	0	0	0	0	0	0	d__Bacteria; p__Gemmatimonadetes; c__Gemmatimonadetes; o__Gemmatimonadales; f__Gemmatimonadaceae; g__Gemmatimonas
OTU_2165	0	0	0	0	0	0	0	2	0	1	0	2	0	0	1	0	0	0	0	0	0	0	0	0	0	0	0	0	0	0	0	0	0	0	0	0	0	0	0	0	0	0	0	0	0	d__Bacteria; p__Proteobacteria; c__Alphaproteobacteria; o__Acetobacterales; f__Acetobacterales_Incertae_Sedis; g__uncultured; s__metagenome
OTU_2166	0	0	2	0	0	0	3	3	4	0	2	3	1	4	3	0	0	0	0	0	0	0	0	0	0	0	0	0	0	0	0	0	0	0	0	0	0	0	0	0	0	0	0	0	0	d__Bacteria; p__Chloroflexi; c__Chloroflexia; o__Thermomicrobiales; f__JG30_KF_CM45; g__JG30_KF_CM45_ge
OTU_2167	9	6	7	7	2	6	12	5	14	10	13	4	15	5	7	1	0	0	1	0	1	0	1	0	0	0	0	0	0	0	0	0	0	0	0	0	0	0	0	0	1	0	0	0	0	d__Bacteria; p__Actinobacteria; c__Actinobacteria; o__Propionibacteriales; f__Nocardioidaceae; g__Aeromicrobium; s__uncultured_bacterium
OTU_2168	2	1	0	1	1	0	0	2	0	1	1	0	1	0	0	0	0	0	0	0	0	0	0	0	0	0	0	0	0	0	0	0	0	0	0	0	0	0	0	0	0	0	0	0	0	d__Bacteria; p__Planctomycetes; c__Planctomycetacia; o__Isosphaerales; f__Isosphaeraceae
OTU_2170	0	3	0	0	0	2	0	4	0	0	0	1	0	0	0	0	0	0	0	0	0	0	0	0	0	0	0	0	0	0	0	0	0	0	0	0	0	0	0	0	0	0	0	0	0	d__Bacteria; p__Deinococcus_Thermus; c__Deinococci; o__Deinococcales; f__Deinococcaceae; g__Deinococcus
OTU_2172	0	0	0	0	0	0	0	0	0	0	0	0	0	0	0	0	0	0	0	0	0	0	0	0	0	0	0	0	0	0	1	0	5	4	8	0	1	17	3	0	0	1	0	1	4	Unclassified
OTU_2173	1	1	0	1	0	0	2	1	1	1	1	1	0	1	0	0	0	0	0	0	0	0	0	0	0	0	0	0	0	0	0	0	0	0	0	0	0	0	0	0	0	0	0	0	0	d__Bacteria; p__Proteobacteria; c__Alphaproteobacteria; o__Rhizobiales; f__uncultured; g__uncultured_ge
OTU_2174	2	5	1	0	0	1	1	1	6	3	1	1	2	1	0	0	0	0	13	4	1	0	0	0	8	1	9	0	0	0	0	0	0	1	0	0	1	0	0	0	0	1	0	0	0	d__Bacteria; p__Acidobacteria; c__Subgroup_6; o__Unknown_Order; f__Unknown_Family; g__Luteitalea; s__uncultured_bacterium
OTU_2175	2	3	2	1	0	1	14	3	4	9	1	1	6	0	3	0	0	0	10	1	3	0	0	0	0	1	3	0	0	0	0	0	0	0	0	0	0	0	0	0	0	0	0	0	0	d__Bacteria; p__Verrucomicrobia; c__Verrucomicrobiae; o__Chthoniobacterales; f__Chthoniobacteraceae; g__Chthoniobacter; s__uncultured_Verrucomicrobia_bacterium
OTU_2176	0	0	0	0	0	0	0	0	0	0	0	0	0	0	0	0	31	0	0	0	0	0	0	0	0	0	0	0	0	0	0	1	0	3	5	9	0	9	0	2	1	2	0	0	0	Unclassified
OTU_2177	0	0	0	0	0	2	2	1	1	1	1	1	0	0	0	0	0	0	4	0	0	0	0	0	0	0	2	0	0	0	0	0	0	0	0	0	0	0	0	0	0	0	0	0	0	d__Bacteria; p__Proteobacteria; c__Deltaproteobacteria; o__Myxococcales; f__Haliangiaceae; g__Haliangium
OTU_2178	20	2	5	3	2	2	4	1	2	3	0	0	5	5	0	3	8	503	3	2	30	78	118	13	1	2	15	89	62	24	14	114	11	4	1	12	2	8	2	5	5	7	57	80	80	d__Bacteria; p__Actinobacteria; c__Actinobacteria; o__Kineosporiales; f__Kineosporiaceae; g__Quadrisphaera
OTU_2179	0	0	0	1	2	0	0	6	1	0	1	0	1	0	0	0	0	0	0	1	0	0	0	0	0	0	0	0	0	0	0	0	0	0	0	0	0	0	0	0	0	0	0	0	0	d__Bacteria; p__Proteobacteria; c__Deltaproteobacteria; o__Bdellovibrionales; f__Bdellovibrionaceae; g__Bdellovibrio; s__uncultured_bacterium
OTU_218	0	0	0	0	0	0	0	0	0	1	0	0	0	0	0	0	0	0	0	0	89	0	0	0	0	1375	0	0	0	0	0	0	0	1	1	0	1	0	0	0	0	0	0	0	0	d__Bacteria; p__Proteobacteria; c__Gammaproteobacteria; o__Enterobacteriales; f__Enterobacteriaceae; g__Serratia; s__Serratia_symbiotica
OTU_2180	10	7	2	49	13	2	8	8	4	12	7	7	8	12	2	0	0	0	1	1	0	0	0	0	1	0	0	0	0	0	0	27	0	1	0	0	0	2	0	0	1	0	2	0	0	d__Bacteria; p__Proteobacteria; c__Alphaproteobacteria; o__Rhizobiales; f__Devosiaceae
OTU_2181	0	0	0	0	0	0	0	0	1	0	0	0	0	0	0	10	3	13	1	0	3	2	6	1	2	0	6	9	16	10	46	20	12	1	0	3	1	1	13	0	3	8	20	22	44	d__Bacteria; p__Actinobacteria; c__Actinobacteria; o__Micrococcales; f__Microbacteriaceae
OTU_2182	0	2	0	1	1	0	1	0	5	1	0	0	1	1	0	0	0	0	2	0	1	0	0	0	0	0	0	0	0	0	0	0	0	0	0	0	0	0	0	0	0	0	0	0	0	d__Bacteria; p__Proteobacteria; c__Deltaproteobacteria; o__Myxococcales
OTU_2183	0	0	0	0	0	0	0	1	13	0	0	0	0	0	1	0	0	0	0	0	0	0	0	0	0	0	0	0	0	0	0	0	0	0	0	0	0	0	0	0	0	0	0	0	0	d__Bacteria; p__Firmicutes; c__Bacilli; o__Bacillales; f__Paenibacillaceae; g__Paenibacillus; s__Paenibacillus_agaridevorans
OTU_2184	0	1	0	0	1	0	1	0	1	0	0	1	1	0	0	0	0	0	2	0	0	0	0	0	0	0	0	1	0	0	0	0	0	0	8	0	0	2	0	0	0	0	0	0	0	d__Bacteria; p__Firmicutes; c__Clostridia; o__Clostridiales; f__Clostridiaceae_1; g__Clostridium_sensu_stricto_1; s__Clostridium_butyricum
OTU_2185	0	1	0	0	1	1	1	0	6	2	1	1	1	1	1	0	0	0	0	0	0	0	0	0	0	0	0	0	0	0	0	0	0	0	0	0	0	0	0	0	0	0	0	0	0	d__Bacteria; p__Gemmatimonadetes; c__S0134_terrestrial_group; o__S0134_terrestrial_group_or; f__S0134_terrestrial_group_fa; g__S0134_terrestrial_group_ge; s__metagenome
OTU_2186	0	0	0	0	0	1	0	0	1	0	1	0	0	0	0	2	1	4	2	0	0	0	0	0	0	0	0	0	0	0	1	7	2	0	0	2	2	0	16	1	18	7	22	16	6	d__Bacteria; p__Proteobacteria; c__Alphaproteobacteria; o__Sphingomonadales; f__Sphingomonadaceae
OTU_2187	0	8	0	0	1	0	0	1	0	0	0	1	1	1	0	0	0	0	0	0	0	0	0	0	0	0	0	0	0	0	0	0	0	0	0	0	0	0	0	0	0	0	0	0	0	d__Bacteria; p__Proteobacteria; c__Deltaproteobacteria; o__Myxococcales; f__Blfdi19; g__Blfdi19_ge
OTU_2188	0	1	0	0	0	0	0	0	1	0	1	1	0	0	0	0	0	0	0	0	0	0	0	0	0	0	0	0	0	0	0	0	0	0	0	0	0	0	0	0	0	0	0	0	0	d__Bacteria
OTU_2189	0	0	2	2	1	1	3	2	2	1	0	0	2	1	0	0	0	0	0	0	0	0	0	0	0	0	0	0	0	0	0	0	0	0	0	0	0	0	0	0	0	0	0	0	0	d__Bacteria; p__Actinobacteria; c__Thermoleophilia; o__Solirubrobacterales; f__Solirubrobacteraceae
OTU_2190	0	0	0	0	0	0	0	0	0	0	0	0	0	0	0	0	0	0	0	0	0	0	0	0	0	0	0	0	0	0	0	1	0	7	13	0	0	0	0	14	5	2	0	0	0	Unclassified
OTU_2192	1	0	0	6	1	0	1	4	3	2	3	0	0	1	0	0	0	0	0	0	0	0	0	0	0	0	0	0	0	0	0	0	0	0	0	0	0	0	0	0	0	0	0	0	0	d__Bacteria; p__Proteobacteria; c__Alphaproteobacteria; o__Caulobacterales; f__Caulobacteraceae; g__uncultured
OTU_2193	0	0	0	0	0	0	0	0	0	0	0	0	0	0	0	0	0	0	0	0	0	5	7	0	0	0	0	0	1	0	2	4	5	0	3	0	4	3	0	0	4	2	0	1	3	Unclassified
OTU_2194	4	1	4	2	1	0	1	2	6	2	0	2	1	0	1	0	0	0	1	0	0	0	0	0	0	0	0	0	0	0	0	0	0	0	0	0	0	0	0	0	0	0	0	0	0	d__Bacteria; p__Bacteroidetes; c__Bacteroidia; o__Cytophagales; f__Microscillaceae
OTU_2195	0	0	0	0	1	1	0	0	0	2	1	0	3	0	0	0	0	0	0	2	0	0	0	0	0	0	0	0	0	0	0	0	0	0	0	0	0	0	0	0	0	0	0	0	0	Unclassified
OTU_2196	0	0	0	0	0	0	0	0	0	0	0	0	0	0	0	0	0	1	0	0	0	0	0	0	0	0	0	0	0	0	0	0	0	0	0	0	1	1	4	0	0	0	0	0	19	Unclassified
OTU_2197	0	1	0	1	1	1	3	0	1	3	0	0	1	2	0	0	0	0	0	0	1	0	0	0	2	0	0	0	0	0	0	0	0	0	2	0	0	0	0	0	0	0	0	0	0	d__Bacteria; p__Chloroflexi; c__Ktedonobacteria; o__C0119; f__C0119_fa; g__C0119_ge; s__uncultured_soil_bacterium
OTU_2198	1	2	1	1	2	4	0	1	7	0	0	0	0	0	0	0	0	0	0	0	0	0	0	0	0	0	0	0	0	0	0	0	0	0	0	0	0	0	0	0	0	0	0	0	0	d__Bacteria; p__Firmicutes; c__Clostridia; o__Clostridiales; f__Lachnospiraceae; g__Fusicatenibacter; s__uncultured_bacterium
OTU_2199	0	0	0	0	0	0	0	0	0	0	0	0	0	0	0	1	1	0	0	0	2	1	1	0	12	0	5	0	0	0	0	0	0	0	0	0	0	0	0	0	0	0	0	0	0	Unclassified
OTU_220	0	0	0	0	0	0	0	0	0	0	0	0	0	0	0	0	0	0	0	27	0	74	0	3	1	1	1063	97	2	2	0	0	1	0	11	0	0	4	0	0	0	0	0	0	0	Unclassified
OTU_2200	0	0	0	1	0	0	0	0	2	2	1	0	0	0	0	0	0	0	0	0	0	0	0	0	0	0	0	0	0	0	0	0	0	0	0	0	0	0	0	0	0	0	0	0	0	d__Bacteria; p__Planctomycetes; c__Planctomycetacia; o__Pirellulales; f__Pirellulaceae; g__uncultured
OTU_2201	0	0	2	0	0	2	0	0	2	5	1	2	2	1	0	0	0	0	9	2	0	1	0	0	1	0	0	0	0	0	0	0	0	0	0	0	1	0	0	0	0	0	0	0	0	d__Bacteria; p__Acidobacteria; c__Subgroup_6; o__Subgroup_6_or; f__Subgroup_6_fa; g__Subgroup_6_ge
OTU_2202	1	2	1	0	1	0	2	0	0	0	0	0	0	0	1	0	0	0	0	0	0	0	0	0	1	0	0	0	0	0	0	0	0	0	0	0	0	0	0	0	0	0	0	0	0	d__Bacteria; p__Firmicutes; c__Bacilli; o__Lactobacillales; f__Aerococcaceae; g__Aerococcus; s__Aerococcus_urinaeequi
OTU_2203	87	139	5	5	15	7	1	3	3	77	45	25	0	3	1	1	0	2	0	0	1	0	0	0	0	0	1	0	9	0	0	0	0	0	0	0	0	0	0	0	0	0	0	0	0	d__Bacteria; p__Bacteroidetes; c__Bacteroidia; o__Chitinophagales; f__Chitinophagaceae; g__Cnuella
OTU_2204	1	0	0	0	1	0	0	0	7	8	0	1	2	0	0	0	0	0	1	2	1	0	0	0	0	0	0	0	0	0	0	0	0	0	1	0	0	0	0	0	0	0	0	1	0	d__Bacteria; p__Planctomycetes; c__Planctomycetacia; o__Isosphaerales; f__Isosphaeraceae; g__Singulisphaera; s__uncultured_Singulisphaera_sp.
OTU_2205	0	1	1	0	1	0	0	0	1	3	1	0	1	1	0	0	0	0	1	0	0	0	0	0	0	0	0	0	0	0	0	0	0	0	0	0	0	0	0	0	0	0	0	0	0	d__Bacteria; p__Planctomycetes; c__Planctomycetacia; o__Pirellulales; f__Pirellulaceae; g__Pirellula; s__uncultured_bacterium
OTU_2206	0	8	0	0	0	0	0	0	0	0	0	0	0	0	0	0	0	0	0	0	0	0	0	0	0	0	0	0	0	0	0	0	0	0	0	0	0	0	0	0	0	0	0	0	0	d__Bacteria; p__Proteobacteria; c__Gammaproteobacteria; o__Betaproteobacteriales; f__Burkholderiaceae; g__Paenalcaligenes; s__Alcaligenes_faecalis
OTU_2207	0	0	0	1	0	0	1	4	0	0	0	0	0	0	0	0	0	0	0	0	0	0	0	0	0	0	0	0	0	0	0	0	0	0	0	0	0	0	0	0	0	0	0	0	0	d__Bacteria; p__Proteobacteria; c__Deltaproteobacteria; o__Myxococcales; f__Polyangiaceae
OTU_2208	3	0	0	0	1	0	1	3	6	1	0	1	0	0	0	0	0	0	0	0	0	0	0	0	0	0	0	0	0	0	0	0	0	0	0	0	0	0	0	0	0	0	0	0	0	d__Bacteria; p__Planctomycetes; c__Planctomycetacia; o__Planctomycetales; f__uncultured; g__uncultured_ge; s__uncultured_planctomycete
OTU_2209	0	0	2	0	1	2	0	2	2	1	1	2	0	1	2	0	0	0	0	0	0	0	0	0	0	0	0	0	0	0	0	0	0	0	0	0	0	0	0	0	0	0	0	0	0	d__Bacteria; p__Gemmatimonadetes; c__Longimicrobia; o__Longimicrobiales; f__Longimicrobiaceae; g__Longimicrobiaceae_ge
OTU_221	1	6	4	3	1	7	0	0	0	16	152	11	0	5	0	0	2	4	1	10	3	0	2	1	35	5	0	0	2	1	0	1	0	1	0	0	0	0	0	0	0	0	0	8	5	d__Bacteria; p__Proteobacteria
OTU_2210	2	0	0	1	1	0	3	3	0	3	1	2	1	1	1	0	0	0	8	1	3	0	0	1	0	2	4	0	0	0	0	11	0	0	4	0	0	0	1	0	0	0	2	0	1	d__Bacteria; p__Proteobacteria; c__Alphaproteobacteria; o__Rhizobiales; f__Labraceae; g__Labrys
OTU_2211	0	0	0	0	0	0	0	0	0	0	0	0	0	0	0	0	0	3	0	0	0	0	0	0	0	0	0	1	0	0	1	0	0	0	0	0	0	0	1	0	0	0	6	5	26	d__Bacteria; p__Proteobacteria
OTU_2212	1	0	1	0	1	0	1	3	2	1	0	1	1	2	0	0	0	0	0	0	0	0	0	0	0	0	0	0	0	0	0	0	0	0	0	0	0	0	0	0	0	0	0	0	0	d__Bacteria; p__Acidobacteria; c__Acidobacteriia; o__Solibacterales; f__Solibacteraceae_Subgroup_3; g__Candidatus_Solibacter
OTU_2213	2	0	1	3	0	1	1	0	1	0	1	0	0	0	0	0	0	0	0	0	0	0	0	0	0	0	0	0	0	0	0	0	0	0	0	0	0	0	0	0	0	0	0	0	0	d__Bacteria; p__Verrucomicrobia; c__Verrucomicrobiae; o__Pedosphaerales; f__Pedosphaeraceae; g__Pedosphaeraceae_ge
OTU_2214	1	1	1	0	0	0	3	0	0	2	1	0	0	0	0	0	0	0	0	0	0	0	0	0	1	0	0	0	0	0	0	0	1	0	0	0	0	0	0	0	0	0	0	0	0	d__Bacteria; p__Proteobacteria; c__Deltaproteobacteria; o__Myxococcales; f__Nannocystaceae; g__Nannocystis; s__metagenome
OTU_2215	0	0	1	0	0	0	1	0	2	0	1	1	1	1	0	0	0	0	2	0	0	0	0	0	0	0	0	0	0	0	0	0	0	0	0	0	0	0	0	0	0	0	0	0	0	d__Bacteria; p__Planctomycetes; c__Planctomycetacia; o__Pirellulales; f__Pirellulaceae
OTU_2216	0	0	0	1	0	0	1	0	0	0	0	1	0	0	0	0	0	0	0	4	1	0	1	1	0	0	2	0	0	0	0	0	0	0	0	0	0	0	0	0	0	0	0	0	0	Unclassified
OTU_2217	1	1	0	0	0	1	0	0	5	0	0	0	2	0	1	0	0	0	0	0	0	0	0	0	1	0	0	0	0	0	0	0	0	0	0	0	0	0	0	0	0	0	0	0	0	d__Bacteria; p__Planctomycetes; c__Phycisphaerae; o__Tepidisphaerales; f__WD2101_soil_group; g__WD2101_soil_group_ge
OTU_2218	1	2	0	1	1	1	1	0	6	3	0	1	2	0	1	0	0	0	3	0	0	0	0	1	1	2	0	0	0	0	0	0	0	0	0	0	0	0	0	0	0	0	0	0	0	d__Bacteria; p__Actinobacteria; c__Acidimicrobiia
OTU_222	0	0	0	0	0	0	0	0	0	0	0	0	0	0	0	9	1	22	0	0	1	72	15	10	0	0	0	32	0	22	860	90	455	6	1	1	27	17	154	15	15	173	313	214	209	d__Bacteria
OTU_2220	0	0	1	0	0	0	0	0	3	1	0	1	0	1	1	1	0	0	1	0	0	0	0	0	0	0	0	0	0	0	0	1	0	0	0	0	0	0	0	0	0	1	0	0	0	d__Bacteria; p__Proteobacteria; c__Deltaproteobacteria; o__Oligoflexales; f__0319_6G20; g__0319_6G20_ge; s__metagenome
OTU_2221	0	0	1	0	1	1	3	0	0	0	0	0	3	0	0	0	0	0	10	1	0	0	0	0	1	2	0	0	0	0	0	0	0	0	1	0	0	1	0	0	1	0	0	0	0	d__Bacteria; p__Acidobacteria; c__Acidobacteriia; o__Solibacterales; f__Solibacteraceae_Subgroup_3; g__Candidatus_Solibacter
OTU_2222	1	0	1	0	0	1	1	0	0	0	0	1	0	0	0	0	0	0	0	0	0	0	0	0	0	0	0	0	0	0	0	0	0	0	0	0	0	0	0	0	0	0	0	0	0	d__Bacteria; p__Armatimonadetes; c__uncultured; o__uncultured_or; f__uncultured_fa; g__uncultured_ge; s__metagenome
OTU_2223	1	1	2	0	1	0	1	0	0	0	0	0	0	2	0	0	1	0	0	2	0	1	0	0	1	0	0	0	0	0	0	0	0	0	0	0	0	0	0	0	0	0	0	0	0	d__Bacteria; p__Actinobacteria; c__Actinobacteria; o__Corynebacteriales; f__Corynebacteriaceae; g__Corynebacterium_1; s__Corynebacterium_freneyi
OTU_2224	0	0	2	0	0	1	4	2	4	4	1	1	2	0	2	0	0	0	11	2	0	0	0	0	3	4	2	0	0	0	0	0	0	0	0	0	0	0	0	0	0	0	0	0	0	d__Bacteria; p__Actinobacteria; c__Thermoleophilia; o__Gaiellales; f__Gaiellaceae; g__Gaiella
OTU_2225	0	0	0	0	1	0	0	0	1	1	0	1	0	0	0	0	0	0	1	1	1	0	0	0	0	1	0	0	0	0	0	0	0	5	0	0	1	1	0	0	1	1	2	1	0	d__Bacteria; p__Planctomycetes; c__Planctomycetacia; o__Isosphaerales; f__Isosphaeraceae
OTU_2226	1	1	1	0	0	0	1	0	0	0	0	1	1	0	0	0	0	0	0	0	0	0	0	0	0	0	0	0	0	0	0	0	0	0	0	0	0	0	0	0	0	0	0	0	0	d__Bacteria; p__Proteobacteria; c__Gammaproteobacteria; o__Gammaproteobacteria_Incertae_Sedis; f__Unknown_Family; g__Unknown_Family_ge; s__uncultured_soil_bacterium
OTU_2227	0	0	0	0	0	0	0	0	0	0	0	0	0	0	0	0	0	0	1	3	0	0	0	25	2	0	2	0	0	0	0	0	0	0	0	0	0	0	0	0	0	0	0	0	1	d__Bacteria
OTU_2228	2	1	1	1	0	0	0	1	5	3	1	0	0	1	1	0	0	0	1	0	0	0	0	0	0	0	0	0	0	0	0	0	0	0	0	0	0	0	0	0	0	0	0	0	0	d__Bacteria; p__Verrucomicrobia; c__Verrucomicrobiae; o__Verrucomicrobiales; f__Verrucomicrobiaceae; g__Prosthecobacter
OTU_2229	2	1	1	2	1	0	0	3	0	0	2	1	0	1	0	0	0	0	0	0	0	0	0	0	0	0	0	0	0	0	0	0	0	0	0	0	0	0	0	0	0	1	0	0	0	d__Bacteria; p__Proteobacteria; c__Deltaproteobacteria; o__Myxococcales; f__Phaselicystidaceae; g__Phaselicystis
OTU_223	3	5	3	9	25	5	1	4	0	66	12	23	8	14	4	8	8	82	4	35	341	18	17	5	26	86	96	3	16	25	0	42	0	2	0	0	4	3	1	2	2	1	18	11	13	d__Bacteria; p__Bacteroidetes; c__Bacteroidia; o__Cytophagales; f__Hymenobacteraceae; g__Hymenobacter; s__Hymenobacter_algoricola
OTU_2230	0	0	0	0	0	1	0	0	0	0	2	0	0	0	0	0	0	0	28	2	0	0	0	1	1	0	1	0	0	0	0	0	0	0	0	0	0	0	0	0	0	0	0	1	0	d__Bacteria; p__Proteobacteria; c__Gammaproteobacteria; o__Betaproteobacteriales; f__SC_I_84; g__SC_I_84_ge
OTU_2231	0	3	0	2	1	0	1	0	4	2	1	2	1	0	0	0	0	0	0	0	0	0	0	0	0	0	0	0	0	0	0	0	0	0	1	0	0	0	0	0	0	0	0	0	0	d__Bacteria; p__Bacteroidetes; c__Bacteroidia; o__Cytophagales; f__Cytophagaceae; g__Sporocytophaga; s__uncultured_bacterium
OTU_2233	1	0	0	0	0	0	5	1	1	1	4	0	1	1	0	0	1	0	11	0	3	0	0	0	0	1	4	0	0	0	1	0	0	1	1	0	0	0	0	0	0	0	0	0	1	d__Bacteria; p__Actinobacteria; c__Actinobacteria; o__Streptomycetales; f__Streptomycetaceae; g__Streptomyces; s__Streptomyces_mutomycini
OTU_2234	0	1	2	1	0	0	1	2	3	1	0	1	5	0	1	0	0	0	4	2	0	0	0	0	0	0	0	0	0	0	0	0	0	0	0	0	0	0	0	0	0	0	0	0	0	d__Bacteria; p__Actinobacteria; c__Thermoleophilia; o__Solirubrobacterales
OTU_2236	0	3	1	0	0	0	0	0	0	0	0	0	0	0	0	0	0	0	0	0	0	0	0	0	0	0	0	0	0	0	0	0	0	0	1	0	0	0	0	0	0	0	0	0	0	d__Bacteria; p__Proteobacteria; c__Deltaproteobacteria; o__Desulfovibrionales; f__Desulfovibrionaceae; g__Desulfovibrio; s__Desulfovibrio_simplex
OTU_2238	0	0	2	3	1	1	2	2	0	0	1	1	0	0	1	0	0	0	1	0	0	0	0	0	0	0	0	0	0	0	0	0	0	0	0	0	0	0	0	0	0	0	0	0	0	d__Bacteria; p__Bacteroidetes; c__Bacteroidia; o__Cytophagales; f__Microscillaceae
OTU_2239	0	0	0	0	0	0	0	0	0	0	0	0	0	0	0	0	0	0	0	0	0	0	0	0	0	0	0	0	0	0	0	0	0	0	15	0	0	0	0	0	0	0	0	0	0	d__Bacteria; p__Proteobacteria; c__Gammaproteobacteria; o__Betaproteobacteriales; f__Chromobacteriaceae; g__Vogesella; s__uncultured_bacterium
OTU_224	0	4	0	2	189	1	0	0	0	0	0	0	5	1	1	0	0	0	0	0	0	0	0	0	0	16	0	0	0	0	0	0	1	0	0	0	0	0	0	0	0	0	0	0	0	d__Bacteria; p__Proteobacteria; c__Gammaproteobacteria
OTU_2240	0	3	2	0	4	0	0	1	0	1	1	0	0	0	0	0	0	0	15	0	2	0	0	0	3	3	2	0	2	0	0	0	0	0	0	0	0	0	0	0	0	0	0	0	0	d__Bacteria; p__Actinobacteria; c__Thermoleophilia; o__Solirubrobacterales; f__67_14; g__67_14_ge
OTU_2241	0	0	0	6	2	0	0	2	1	2	10	1	0	3	0	0	0	13	0	0	62	0	0	0	0	0	0	0	0	0	0	0	0	0	0	0	0	0	0	0	0	0	0	0	1	d__Bacteria; p__Verrucomicrobia; c__Verrucomicrobiae; o__Chthoniobacterales; f__Chthoniobacteraceae; g__Chthoniobacter
OTU_2242	0	0	0	0	0	1	2	1	0	1	0	1	1	0	2	0	0	0	7	0	0	0	0	0	1	0	2	0	1	0	2	0	0	0	1	0	0	0	0	0	0	0	0	0	0	d__Bacteria; p__Actinobacteria; c__Acidimicrobiia; o__IMCC26256; f__IMCC26256_fa; g__IMCC26256_ge
OTU_2243	0	0	0	0	0	0	0	0	0	0	0	0	0	0	0	0	0	0	0	0	0	0	0	0	0	0	0	0	0	0	0	0	0	0	0	0	0	0	27	0	3	0	0	0	0	d__Bacteria
OTU_2244	5	4	4	4	3	0	2	2	5	3	1	1	4	0	0	0	0	0	1	1	0	0	0	0	1	0	1	0	1	0	0	0	0	6	7	0	0	0	0	1	1	0	0	0	0	d__Bacteria; p__Actinobacteria; c__Actinobacteria; o__Micrococcales; f__Intrasporangiaceae; g__Terrabacter; s__uncultured_bacterium
OTU_2245	0	0	0	0	0	0	0	0	0	0	0	0	0	0	0	0	0	0	0	0	0	0	0	0	0	0	0	0	0	0	1	6	21	0	4	1	11	15	3	1	8	11	0	0	0	d__Bacteria; p__Planctomycetes; c__Planctomycetacia; o__Isosphaerales; f__Isosphaeraceae
OTU_2246	1	0	0	0	0	0	0	1	1	1	0	0	0	0	0	0	0	0	1	0	0	0	0	0	1	0	1	0	0	0	0	0	0	0	0	0	0	0	0	0	0	0	0	0	0	d__Bacteria; p__Planctomycetes; c__Planctomycetacia; o__Isosphaerales; f__Isosphaeraceae; g__uncultured
OTU_2248	0	0	0	0	0	0	0	0	0	0	0	0	0	0	0	31	0	3	0	0	0	0	0	0	0	0	0	0	0	0	0	0	0	0	0	0	0	0	0	0	0	0	0	0	0	Unclassified
OTU_225	37	57	45	26	34	31	69	57	120	64	34	30	45	33	31	0	0	0	57	6	1	1	0	1	6	1	6	0	0	0	0	0	0	0	12	0	0	0	0	0	0	0	0	0	0	d__Bacteria; p__Gemmatimonadetes; c__Gemmatimonadetes; o__Gemmatimonadales; f__Gemmatimonadaceae; g__uncultured
OTU_2250	0	0	0	0	0	0	0	0	0	0	0	0	0	0	0	0	0	0	0	0	0	0	0	0	0	0	0	0	0	0	14	25	9	11	0	0	9	6	2	4	14	5	1	0	0	d__Bacteria; p__Armatimonadetes; c__Fimbriimonadia; o__Fimbriimonadales; f__Fimbriimonadaceae; g__Fimbriimonadaceae_ge
OTU_2251	0	1	0	0	0	0	1	0	1	0	0	0	1	0	1	0	0	0	0	0	0	0	0	0	0	0	0	0	0	0	0	0	0	0	0	0	0	0	0	0	0	0	0	0	0	d__Bacteria
OTU_2252	1	0	1	0	1	0	0	1	1	2	0	0	0	0	0	0	0	0	0	0	0	0	0	0	0	0	0	0	0	0	0	0	0	0	0	0	0	0	0	0	0	0	0	0	0	d__Bacteria; p__Chloroflexi; c__Chloroflexia; o__Thermomicrobiales; f__AKYG1722; g__AKYG1722_ge
OTU_2255	1	5	2	1	2	4	6	0	0	5	0	0	1	9	0	5	2	28	2	3	8	5	7	13	1	2	3	22	18	6	1	0	0	0	0	0	1	0	2	0	0	0	2	1	1	d__Bacteria; p__Actinobacteria; c__Actinobacteria; o__Kineosporiales; f__Kineosporiaceae
OTU_2256	686	765	378	289	876	473	258	60	63	1794	898	325	785	462	148	15	3	55	39	6	436	41	32	9	15	9	45	19	23	43	0	2	0	108	0	0	0	0	0	1	3	0	0	0	0	d__Bacteria; p__Bacteroidetes; c__Bacteroidia; o__Cytophagales; f__Hymenobacteraceae; g__Hymenobacter
OTU_2257	0	0	0	0	0	0	0	0	0	0	0	0	0	0	0	0	0	0	0	0	1	0	0	0	0	0	0	0	0	0	0	8	1	3	2	4	2	1	0	7	6	0	0	0	1	d__Bacteria; p__Proteobacteria; c__Deltaproteobacteria; o__Bdellovibrionales; f__Bdellovibrionaceae; g__Bdellovibrio
OTU_2258	1	2	2	0	0	2	3	2	5	1	4	2	3	3	1	0	0	0	1	0	0	0	0	1	0	0	0	0	0	0	0	0	0	0	0	0	0	0	0	0	0	0	0	0	0	d__Bacteria; p__Acidobacteria; c__Subgroup_6; o__Subgroup_6_or; f__Subgroup_6_fa; g__Subgroup_6_ge
OTU_2259	1	2	1	0	0	0	0	0	0	2	0	0	1	0	1	0	0	0	0	0	1	1	0	0	0	0	0	0	0	0	0	0	0	0	0	0	0	0	0	0	0	0	0	0	0	Unclassified
OTU_2260	0	3	2	0	1	0	0	13	5	0	0	0	1	0	0	0	0	5	0	0	0	0	0	0	1	2	2	0	0	0	0	0	0	0	0	0	1	0	0	0	0	0	0	0	0	d__Bacteria; p__Acidobacteria; c__Blastocatellia_Subgroup_4; o__Blastocatellales; f__Blastocatellaceae; g__Blastocatella
OTU_2261	0	0	0	0	0	1	1	0	1	0	0	0	0	0	0	0	0	0	5	3	1	0	0	0	3	0	4	0	0	0	0	0	0	0	0	0	0	0	0	2	0	0	0	0	0	d__Bacteria; p__Actinobacteria; c__Acidimicrobiia; o__Microtrichales; f__uncultured; g__uncultured_ge
OTU_2263	0	0	2	0	0	0	1	1	0	0	0	0	0	0	0	0	0	0	6	0	0	0	0	0	3	2	3	0	0	0	0	0	0	0	0	0	0	0	0	0	0	0	0	0	1	d__Bacteria; p__Chloroflexi; c__Anaerolineae; o__Anaerolineales; f__Anaerolineaceae; g__uncultured
OTU_2264	0	0	0	0	0	0	0	0	0	0	0	0	0	0	0	0	1	0	0	0	0	0	0	0	0	0	0	0	1	1	66	30	16	4	0	3	6	4	11	10	6	7	11	2	2	d__Bacteria; p__Proteobacteria; c__Alphaproteobacteria; o__Rhizobiales; f__Beijerinckiaceae
OTU_2265	1	0	1	0	0	1	1	0	1	0	0	0	1	0	0	0	0	0	0	0	0	0	0	0	0	0	0	0	0	0	0	0	0	0	3	0	0	0	0	0	0	0	0	0	0	d__Bacteria; p__Rokubacteria; c__NC10; o__Rokubacteriales; f__Rokubacteriales_fa; g__Rokubacteriales_ge; s__uncultured_bacterium
OTU_2266	0	1	0	0	0	0	2	0	2	0	1	1	0	0	0	0	1	10	14	2	2	2	0	0	0	2	1	0	1	2	11	2	0	0	8	1	2	0	2	0	2	1	3	3	0	d__Bacteria; p__Proteobacteria; c__Alphaproteobacteria; o__Rhizobiales; f__Rhizobiaceae; g__Allorhizobium_Neorhizobium_Pararhizobium_Rhizobium
OTU_2267	3	55	8	12	14	11	42	9	5	32	95	24	19	43	16	54	10	44	15	148	278	509	127	17	354	202	222	104	33	240	4	2	1	22	0	9	1	20	34	9	5	1	13	73	62	d__Bacteria; p__Bacteroidetes; c__Bacteroidia; o__Cytophagales; f__Hymenobacteraceae; g__Hymenobacter
OTU_2268	1	2	1	1	1	0	0	1	1	1	0	2	0	1	0	0	0	0	1	0	0	0	0	0	0	0	0	0	0	0	0	0	0	0	0	0	0	0	0	0	0	0	0	0	0	d__Bacteria; p__Actinobacteria; c__Acidimicrobiia; o__Microtrichales; f__Microtrichaceae; g__uncultured; s__uncultured_Actinomycetales_bacterium
OTU_2269	0	2	0	1	0	1	0	2	0	0	0	0	0	1	1	0	0	0	0	0	0	0	0	0	0	0	0	0	0	0	0	0	0	0	0	0	0	0	0	0	0	0	0	0	0	d__Bacteria; p__Proteobacteria; c__Alphaproteobacteria
OTU_227	7	26	3	13	15	7	29	53	32	17	4	25	14	10	24	0	0	0	0	0	0	0	0	0	0	0	0	0	0	0	0	0	0	0	0	0	0	0	0	0	0	0	0	0	0	d__Bacteria; p__Proteobacteria; c__Deltaproteobacteria; o__Myxococcales; f__Sandaracinaceae; g__uncultured; s__metagenome
OTU_2270	0	0	2	0	0	0	1	3	3	1	0	0	0	0	0	0	0	0	0	0	0	0	0	0	0	0	0	0	0	0	0	0	0	0	0	0	0	0	0	0	0	0	0	0	0	d__Bacteria; p__Bacteroidetes; c__Bacteroidia; o__Sphingobacteriales; f__AKYH767; g__AKYH767_ge; s__uncultured_bacterium
OTU_2271	1	0	0	1	0	0	1	1	1	0	1	0	0	1	0	0	0	0	0	0	0	0	0	0	0	0	0	0	0	0	0	0	0	0	0	0	0	0	0	0	0	0	0	0	0	d__Bacteria
OTU_2272	1	2	0	0	1	0	2	2	3	3	0	1	2	0	0	1	0	0	40	3	5	1	1	0	6	3	5	0	1	3	1	0	0	0	0	0	0	0	0	0	3	0	0	0	0	d__Bacteria; p__Bacteroidetes; c__Bacteroidia; o__Chitinophagales; f__Chitinophagaceae; g__Ferruginibacter
OTU_2273	0	1	1	0	1	0	0	0	0	0	0	0	0	0	0	0	0	0	0	0	0	0	0	0	0	0	0	0	0	0	0	0	0	0	0	0	0	0	0	0	0	0	0	0	0	d__Bacteria; p__Bacteroidetes; c__Bacteroidia; o__Sphingobacteriales; f__env.OPS_17; g__env.OPS_17_ge; s__uncultured_Bacteroidetes_bacterium
OTU_2274	0	0	0	0	0	0	0	0	0	0	0	0	0	0	0	0	0	0	0	0	0	0	0	0	0	0	0	0	0	0	8	2	26	2	1	1	4	1	1	0	3	2	2	1	0	d__Bacteria; p__Proteobacteria; c__Alphaproteobacteria; o__Caulobacterales; f__Caulobacteraceae
OTU_2275	0	0	0	5	0	0	0	0	0	0	0	0	0	0	0	0	0	0	0	0	0	0	0	0	0	0	0	0	0	0	0	0	0	0	0	0	0	0	0	0	0	0	0	0	0	Unclassified
OTU_2276	0	0	0	0	0	0	0	0	0	0	0	0	0	0	0	0	0	0	0	0	0	0	0	0	0	0	0	0	0	0	0	0	0	15	18	2	0	0	0	3	0	0	0	3	6	d__Bacteria; p__Proteobacteria; c__Gammaproteobacteria
OTU_2277	0	0	0	3	0	0	1	0	0	0	0	0	0	0	0	0	0	0	0	0	0	0	0	0	0	0	0	0	0	0	0	0	0	0	0	0	0	0	0	0	0	0	0	0	0	d__Bacteria; p__Patescibacteria; c__Saccharimonadia; o__Saccharimonadales
OTU_2278	0	0	0	0	1	0	0	0	0	0	0	0	0	0	1	0	0	1	0	0	0	0	0	0	0	0	0	0	0	0	1	6	2	7	12	22	7	2	2	3	8	4	2	6	16	d__Bacteria; p__Proteobacteria
OTU_2279	0	0	0	0	1	0	0	2	0	1	2	0	0	1	0	0	0	0	0	0	0	0	0	0	0	0	0	0	0	0	0	0	0	0	0	0	0	0	0	0	0	0	0	0	0	d__Bacteria; p__Chloroflexi; c__Chloroflexia; o__Kallotenuales; f__AKIW781; g__AKIW781_ge
OTU_228	19	19	16	30	17	14	20	10	5	27	34	28	37	25	8	11	8	65	13	6	26	4	1	1	2	4	11	1	2	23	0	1	0	4	0	0	2	2	0	3	6	2	1	30	5	d__Bacteria; p__Actinobacteria; c__Actinobacteria; o__Propionibacteriales; f__Nocardioidaceae; g__Nocardioides
OTU_2280	0	1	1	0	2	0	0	0	1	5	2	1	1	0	0	0	0	0	0	0	30	0	0	0	0	0	0	0	0	0	0	0	0	11	4	0	0	0	0	0	0	0	0	0	0	d__Bacteria; p__Bacteroidetes; c__Bacteroidia; o__Cytophagales; f__Hymenobacteraceae; g__Hymenobacter
OTU_2281	0	0	0	0	3	0	0	0	0	0	0	0	0	0	1	0	0	0	0	0	0	0	0	0	0	0	0	0	0	0	0	0	0	0	0	0	0	0	0	0	0	0	0	0	0	d__Bacteria
OTU_2282	0	0	1	0	2	1	0	1	3	0	0	1	1	0	0	1	0	0	0	0	0	0	0	0	0	0	0	0	0	0	0	0	0	0	0	0	0	0	0	0	0	0	0	0	0	d__Bacteria; p__Chloroflexi; c__TK10; o__TK10_or; f__TK10_fa; g__TK10_ge; s__uncultured_bacterium
OTU_2283	0	0	0	0	1	1	4	1	0	3	0	0	1	0	0	0	0	0	9	3	1	0	0	0	0	1	2	0	0	0	0	0	0	0	0	0	0	0	0	0	0	0	0	0	0	d__Bacteria; p__Proteobacteria; c__Alphaproteobacteria; o__Rhizobiales; f__uncultured; g__uncultured_ge
OTU_2285	1	1	20	1	0	9	4	0	1	1	1	0	1	1	0	0	0	0	14	0	3	0	0	0	0	0	0	0	0	0	0	0	0	0	1	0	0	0	0	0	0	0	0	0	0	d__Bacteria; p__Proteobacteria; c__Gammaproteobacteria; o__Betaproteobacteriales; f__Nitrosomonadaceae; g__IS_44; s__uncultured_beta_proteobacterium
OTU_2286	1	3	1	0	1	0	4	2	5	2	3	2	0	2	0	0	0	0	1	0	0	1	0	0	1	0	0	0	0	0	0	0	0	0	0	0	0	0	0	2	0	0	0	0	0	d__Bacteria; p__Acidobacteria; c__Acidobacteriia; o__Solibacterales; f__Solibacteraceae_Subgroup_3; g__Bryobacter
OTU_2288	0	1	1	1	0	0	3	1	3	1	0	0	1	0	0	0	0	0	0	0	0	0	0	0	0	0	0	0	0	0	0	0	0	0	0	0	0	0	0	0	0	0	0	0	0	d__Bacteria; p__Elusimicrobia; c__Lineage_IIb; o__Lineage_IIb_or; f__Lineage_IIb_fa; g__Lineage_IIb_ge; s__uncultured_bacterium
OTU_229	14	12	8	47	12	12	10	38	23	21	25	18	22	5	5	0	0	1	27	5	4	2	0	0	7	3	2	0	0	0	0	0	0	12	0	0	0	0	0	1	0	0	0	0	0	d__Bacteria; p__Bacteroidetes; c__Bacteroidia; o__Chitinophagales; f__Chitinophagaceae
OTU_2290	0	0	0	0	0	0	0	0	0	0	0	0	0	0	0	0	0	0	0	0	0	0	0	0	0	0	0	0	0	0	5	1	5	3	0	1	8	6	3	0	10	10	21	7	2	d__Bacteria; p__Planctomycetes; c__Planctomycetacia; o__Isosphaerales; f__Isosphaeraceae
OTU_2291	0	0	0	0	2	1	0	0	0	0	0	0	0	0	0	0	0	0	0	0	0	1	1	0	0	0	0	0	0	0	4	4	2	0	0	0	4	3	0	0	0	1	1	0	33	d__Bacteria; p__Patescibacteria; c__Saccharimonadia; o__Saccharimonadales; f__Saccharimonadales_fa; g__Saccharimonadales_ge
OTU_2292	0	0	1	0	1	0	2	2	2	3	0	2	1	0	0	0	0	0	21	2	3	0	0	0	3	0	6	0	0	0	0	0	0	1	1	0	0	0	0	0	1	0	0	0	0	d__Bacteria; p__Chloroflexi; c__Chloroflexia; o__Chloroflexales; f__Roseiflexaceae; g__uncultured; s__uncultured_Chloroflexaceae_bacterium
OTU_2294	0	0	1	1	0	0	0	0	1	0	0	0	0	0	0	0	0	0	0	0	0	0	0	0	0	0	0	0	0	0	0	0	0	0	0	0	0	0	0	0	0	0	0	0	0	d__Bacteria; p__Chlamydiae; c__Chlamydiae; o__Chlamydiales; f__cvE6; g__cvE6_ge; s__Gammaproteobacteria_bacterium_RIFCSPLOWO2_02_FULL_47_50
OTU_2295	0	0	0	0	0	0	0	0	0	0	1	0	0	1	0	0	0	0	4	0	0	0	0	0	0	0	2	0	0	0	0	0	0	0	9	0	0	0	0	0	0	0	0	0	0	d__Bacteria; p__Chloroflexi; c__Anaerolineae; o__Ardenticatenales; f__uncultured; g__uncultured_ge
OTU_2296	0	0	0	0	0	0	0	0	0	0	0	0	0	0	0	0	0	0	0	0	0	0	0	0	0	0	0	0	0	0	1	6	3	1	4	0	1	10	4	1	1	30	0	0	0	Unclassified
OTU_2297	0	6	0	0	4	0	0	0	0	0	0	2	0	0	0	0	0	0	0	0	0	1	0	0	0	0	0	0	0	0	0	0	0	0	0	0	0	0	0	0	0	0	0	0	2	d__Bacteria; p__FBP; c__FBP_cl; o__FBP_or; f__FBP_fa; g__FBP_ge
OTU_2298	0	1	0	0	0	1	0	3	0	0	1	1	0	0	0	0	0	0	0	0	0	0	0	0	0	0	0	0	0	0	0	0	0	0	0	0	0	0	0	0	0	0	0	0	0	d__Bacteria; p__Gemmatimonadetes; c__Longimicrobia; o__Longimicrobiales; f__Longimicrobiaceae; g__Longimicrobiaceae_ge; s__uncultured_soil_bacterium
OTU_2299	2	0	1	2	1	1	6	2	6	3	1	1	3	1	0	0	0	0	1	2	0	0	0	0	0	0	0	0	0	0	0	0	0	0	0	0	0	0	0	0	0	0	0	0	0	d__Bacteria; p__Bacteroidetes; c__Bacteroidia; o__Cytophagales; f__Microscillaceae; g__uncultured; s__metagenome
OTU_23	750	553	239	544	700	363	185	70	52	2989	971	542	685	398	84	9	0	2	3	2	10	2	1	0	3	2	11	1	0	0	0	0	0	0	1	0	0	0	0	0	1	0	0	0	0	d__Bacteria; p__Bacteroidetes; c__Bacteroidia; o__Cytophagales; f__Hymenobacteraceae; g__Hymenobacter
OTU_2301	0	0	0	0	1	0	1	1	1	2	0	0	0	0	0	0	0	0	8	0	0	0	1	0	4	0	3	0	0	0	0	0	0	0	0	0	0	0	0	2	0	0	0	0	0	d__Bacteria; p__Actinobacteria; c__Acidimicrobiia; o__IMCC26256; f__IMCC26256_fa; g__IMCC26256_ge; s__uncultured_Aciditerrimonas_sp.
OTU_2302	0	1	3	0	0	0	3	1	0	2	0	2	1	0	0	0	0	0	4	0	0	0	0	0	0	0	1	0	0	0	0	0	0	0	0	0	0	0	0	0	0	0	0	0	0	d__Bacteria; p__Bacteroidetes; c__Bacteroidia; o__Chitinophagales; f__Chitinophagaceae; g__Ferruginibacter; s__uncultured_Bacteroidetes_bacterium
OTU_2303	0	1	2	0	1	2	3	4	1	2	1	0	1	1	1	0	0	0	18	1	0	0	0	0	0	2	3	0	0	1	0	1	0	0	0	0	0	0	0	0	0	0	0	0	0	d__Bacteria; p__Proteobacteria; c__Alphaproteobacteria; o__Rhizobiales; f__Xanthobacteraceae
OTU_2306	0	0	3	1	0	2	1	2	0	0	0	1	1	0	0	0	0	0	12	2	1	0	0	0	0	0	1	0	0	0	0	0	0	0	0	0	1	0	0	0	0	0	0	0	0	d__Bacteria; p__Acidobacteria; c__Subgroup_6
OTU_2307	0	0	0	0	0	0	0	0	0	0	0	0	0	0	0	0	0	0	0	0	0	0	1	0	0	0	0	10	0	0	0	1	0	0	0	1	0	1	0	0	7	0	0	1	0	d__Bacteria
OTU_2308	2	0	0	0	0	0	3	0	0	0	0	0	0	0	0	0	0	0	0	0	0	0	0	0	0	0	0	0	0	0	0	0	0	0	0	0	0	0	0	0	0	0	0	0	0	Unclassified
OTU_2309	0	1	0	0	0	0	5	0	0	0	2	0	1	0	0	0	0	0	2	1	1	0	0	0	2	2	0	0	0	0	0	0	0	0	0	0	0	0	0	0	0	0	0	0	0	d__Bacteria; p__Proteobacteria; c__Alphaproteobacteria; o__Rhodobacterales; f__Rhodobacteraceae
OTU_231	26	6	4	34	23	7	6	20	14	76	53	45	25	2	5	0	0	0	0	0	0	0	1	0	0	0	0	0	0	0	0	0	0	0	0	1	3	0	0	0	0	0	0	0	0	d__Bacteria; p__Bacteroidetes; c__Bacteroidia; o__Cytophagales; f__Cytophagaceae; g__Rhodocytophaga
OTU_2311	0	0	0	0	0	0	0	0	0	0	0	0	0	0	0	0	0	0	0	0	0	0	0	0	0	0	0	0	0	0	8	16	1	0	0	0	0	0	0	0	1	0	0	0	0	d__Bacteria; p__Actinobacteria
OTU_2312	0	0	0	0	0	1	2	1	2	1	1	0	2	0	1	0	0	0	1	0	0	0	0	0	0	0	0	0	0	0	0	0	0	0	0	0	0	0	0	0	0	0	0	0	0	d__Bacteria; p__Actinobacteria; c__0319_7L14; o__0319_7L14_or; f__0319_7L14_fa; g__0319_7L14_ge; s__uncultured_bacterium
OTU_2313	0	2	0	0	0	2	1	1	5	0	3	0	2	2	2	0	0	0	1	0	0	0	0	0	5	0	1	0	2	0	0	4	0	2	29	0	2	0	0	0	0	0	0	0	0	d__Bacteria; p__Actinobacteria; c__Actinobacteria; o__Micrococcales; f__Micrococcaceae; g__Arthrobacter; s__Arthrobacter_woluwensis
OTU_2315	0	0	0	0	0	0	0	0	1	0	1	0	0	0	0	0	0	0	36	2	0	0	0	0	0	1	3	0	0	0	0	0	0	0	0	0	0	0	0	0	0	0	0	0	0	d__Bacteria; p__Rokubacteria; c__NC10; o__Rokubacteriales; f__Rokubacteriales_fa; g__Rokubacteriales_ge; s__uncultured_bacterium
OTU_2316	0	0	0	0	0	0	0	0	0	0	0	0	0	0	0	0	0	0	0	0	0	0	0	0	0	0	0	1	0	0	1	4	12	0	0	1	4	2	3	0	2	1	1	8	11	d__Bacteria; p__FBP; c__FBP_cl; o__FBP_or; f__FBP_fa; g__FBP_ge
OTU_2317	2	6	3	3	2	4	5	4	10	3	4	3	3	7	2	0	0	1	8	0	0	0	1	0	2	0	0	0	1	0	0	0	0	0	0	0	3	0	0	0	0	0	0	0	0	d__Bacteria; p__Proteobacteria; c__Deltaproteobacteria; o__Myxococcales
OTU_2318	0	1	0	0	1	1	1	0	0	1	0	0	0	0	0	0	0	0	0	0	0	0	0	0	0	0	0	0	0	0	0	0	0	0	0	0	0	0	0	0	0	0	0	0	0	d__Bacteria; p__Gemmatimonadetes; c__Gemmatimonadetes; o__Gemmatimonadales; f__Gemmatimonadaceae
OTU_2319	0	1	0	1	0	0	0	0	0	0	0	0	0	0	0	0	0	0	0	1	1	0	0	1	3	0	5	0	0	0	0	0	1	0	0	0	1	0	0	0	0	1	0	0	0	Unclassified
OTU_2320	0	0	0	0	0	0	0	0	0	0	0	0	0	0	0	9	4	0	0	2	1	0	0	0	0	3	0	0	0	0	0	0	0	0	0	0	0	0	0	0	0	0	0	0	0	Unclassified
OTU_2321	0	0	0	0	0	0	0	0	0	0	0	0	2	0	0	0	0	0	0	0	2	0	0	0	0	0	1	0	0	1	2	9	2	0	5	1	1	0	6	0	13	1	4	4	1	Unclassified
OTU_2324	19	20	11	16	29	16	20	15	21	28	40	23	10	8	13	1	1	2	3	1	4	1	3	0	4	0	2	1	1	1	3	12	0	7	0	4	7	5	17	8	8	1	44	25	45	d__Bacteria; p__Proteobacteria; c__Alphaproteobacteria; o__Rhizobiales; f__Beijerinckiaceae
OTU_2325	3	1	2	3	5	1	6	0	1	14	4	18	4	1	1	59	2	10	18	50	39	19	23	141	61	5	5	35	9	39	23	8	1	12	14	134	17	4	18	2	62	13	2	3	12	d__Bacteria; p__Proteobacteria; c__Gammaproteobacteria; o__Betaproteobacteriales; f__Burkholderiaceae
OTU_2326	0	2	0	0	0	0	1	0	1	1	0	1	2	0	0	0	0	0	0	0	0	0	0	0	0	0	0	0	0	0	0	0	0	0	0	0	0	0	0	0	0	0	0	0	0	d__Bacteria; p__Gemmatimonadetes; c__Gemmatimonadetes; o__Gemmatimonadales; f__Gemmatimonadaceae
OTU_2327	0	0	0	0	0	0	0	0	0	0	0	0	0	0	0	0	0	0	0	0	0	0	0	0	0	0	0	0	0	0	0	0	0	0	3	0	0	2	0	1	0	0	0	0	0	Unclassified
OTU_2328	0	0	4	0	0	4	2	1	2	1	0	0	1	0	0	0	0	0	6	0	0	0	0	0	0	0	0	0	0	0	1	0	0	0	6	0	0	0	0	0	0	0	0	0	0	d__Bacteria; p__Proteobacteria; c__Gammaproteobacteria; o__Betaproteobacteriales; f__Nitrosomonadaceae; g__MND1
OTU_2329	0	0	1	3	0	1	1	0	4	0	1	2	0	2	0	0	0	0	0	0	0	0	0	0	0	0	0	0	0	0	0	0	0	0	0	0	0	0	0	0	0	0	0	0	0	d__Bacteria; p__Actinobacteria; c__Acidimicrobiia; o__uncultured; f__uncultured_fa; g__uncultured_ge; s__uncultured_actinobacterium
OTU_233	0	0	0	0	0	0	0	0	0	0	0	0	0	0	0	16	6	101	4	8	13	16	300	13	8	6	13	68	69	532	21	33	25	7	1	10	10	11	43	14	3	5	219	1522	686	d__Bacteria; p__Bacteroidetes; c__Bacteroidia; o__Cytophagales; f__Hymenobacteraceae; g__Hymenobacter
OTU_2330	0	3	0	0	0	0	0	0	0	0	0	0	0	0	0	0	0	0	0	0	0	0	0	0	0	0	0	0	0	0	0	0	0	29	0	0	0	3	0	0	0	0	0	0	0	d__Bacteria; p__Proteobacteria; c__Gammaproteobacteria; o__Enterobacteriales; f__Enterobacteriaceae; g__Providencia
OTU_2331	3	2	0	3	1	0	1	3	7	2	2	3	0	0	1	0	0	0	0	0	0	1	0	0	1	0	0	0	1	0	2	1	0	0	0	0	0	0	0	0	0	0	2	0	0	d__Bacteria; p__Actinobacteria; c__Actinobacteria; o__Frankiales
OTU_2332	0	0	0	0	0	0	0	1	2	1	0	0	1	0	0	0	0	0	0	0	0	0	0	0	0	0	0	0	0	0	0	0	0	0	0	0	0	0	0	0	0	0	0	0	0	d__Bacteria; p__Chloroflexi; c__Chloroflexia; o__Chloroflexales; f__Roseiflexaceae; g__uncultured
OTU_2333	1	0	1	0	2	1	3	4	3	2	0	0	0	0	0	0	0	0	0	0	0	0	0	1	0	0	0	0	0	0	0	0	0	0	0	0	0	0	0	0	0	0	0	0	0	d__Bacteria; p__Planctomycetes; c__Planctomycetacia; o__Pirellulales; f__Pirellulaceae; g__Pirellula; s__metagenome
OTU_2334	1	2	1	0	2	3	3	0	0	2	3	0	1	3	0	0	0	0	0	0	0	0	0	0	0	0	0	0	0	0	0	1	0	0	0	0	2	3	0	1	0	0	9	1	1	d__Bacteria; p__Proteobacteria; c__Alphaproteobacteria; o__Rhodobacterales; f__Rhodobacteraceae; g__Rubellimicrobium
OTU_2335	0	2	1	1	1	0	0	1	2	1	1	2	2	0	2	0	0	0	0	0	0	0	0	0	0	0	0	0	0	0	0	0	0	0	0	0	0	0	0	0	0	0	0	0	1	d__Bacteria; p__Bacteroidetes; c__Bacteroidia; o__Chitinophagales; f__Chitinophagaceae
OTU_2336	0	0	0	0	0	0	0	0	0	0	0	0	0	0	0	0	3	0	0	0	0	0	0	0	0	0	0	0	0	0	0	2	0	1	0	0	3	2	8	14	6	0	15	2	1	d__Bacteria; p__Armatimonadetes; c__Armatimonadia; o__Armatimonadales; f__Armatimonadales_fa; g__Armatimonadales_ge
OTU_2337	1	0	0	0	2	0	0	0	1	0	0	1	1	0	0	0	0	0	1	0	0	0	0	1	0	0	3	0	0	0	0	0	0	3	1	0	0	0	0	0	0	0	1	0	0	d__Bacteria
OTU_2339	0	1	2	0	0	1	0	1	1	0	1	0	1	0	0	0	0	0	0	0	0	0	0	0	0	0	0	0	0	0	0	0	0	0	0	0	0	0	0	0	0	0	0	0	0	d__Bacteria; p__Verrucomicrobia; c__Verrucomicrobiae; o__Pedosphaerales; f__Pedosphaeraceae; g__Pedosphaera
OTU_234	0	0	0	0	0	0	0	0	0	0	9	1	0	0	0	1	0	136	0	0	60	0	49	0	0	0	19	32	41	44	0	49	0	1	0	0	4	2	2	1	0	0	229	468	148	d__Bacteria; p__Proteobacteria; c__Deltaproteobacteria; o__Myxococcales; f__Archangiaceae; g__Melittangium; s__Melittangium_lichenicola
OTU_2340	0	0	0	1	0	0	0	0	0	0	0	0	0	0	1	0	0	0	0	3	0	0	0	0	0	0	0	0	0	0	0	0	0	0	0	0	0	0	0	0	0	0	0	0	0	d__Bacteria
OTU_2341	3	8	9	7	5	12	6	9	20	21	4	4	14	8	2	0	0	0	33	5	1	0	0	1	6	0	8	0	0	0	0	0	0	0	9	0	0	0	0	0	0	0	0	0	0	d__Bacteria; p__Acidobacteria; c__Subgroup_6; o__Subgroup_6_or; f__Subgroup_6_fa; g__Subgroup_6_ge
OTU_2343	17	73	5	36	27	8	13	21	13	92	28	28	11	9	3	9	1	54	44	45	221	34	96	17	90	6	90	51	30	47	1	16	0	2	2	0	2	0	0	5	10	2	6	4	4	d__Bacteria; p__Proteobacteria; c__Gammaproteobacteria; o__Betaproteobacteriales; f__Burkholderiaceae
OTU_2344	0	0	1	0	0	1	0	0	1	0	0	3	1	0	0	0	0	0	0	0	0	0	0	0	0	0	0	0	0	0	0	0	0	0	0	0	0	0	0	0	0	0	0	0	0	d__Bacteria; p__Chloroflexi; c__Chloroflexia; o__Chloroflexales; f__Roseiflexaceae
OTU_2346	0	0	0	0	0	0	0	0	0	0	0	0	0	2	1	0	0	0	0	0	0	0	0	0	0	0	0	0	0	0	0	0	0	0	0	0	13	0	2	0	0	0	0	0	0	d__Bacteria; p__Proteobacteria; c__Gammaproteobacteria; o__Enterobacteriales; f__Enterobacteriaceae
OTU_2347	1	0	0	0	1	2	3	0	3	1	1	0	0	0	1	0	0	0	9	2	1	0	0	0	1	0	0	0	0	0	0	0	0	0	1	0	0	0	0	0	0	0	0	0	0	d__Bacteria; p__Proteobacteria; c__Deltaproteobacteria; o__Myxococcales
OTU_2348	14	1	4	20	13	17	10	8	8	46	14	5	7	13	4	3	1	15	3	0	14	10	8	4	1	0	5	5	17	27	34	42	18	5	0	6	6	4	17	7	41	7	0	6	0	d__Bacteria; p__Proteobacteria; c__Gammaproteobacteria; o__Betaproteobacteriales; f__Burkholderiaceae
OTU_2349	0	0	1	1	1	2	2	0	0	0	0	0	2	1	0	0	0	0	0	0	0	0	0	0	0	0	0	0	0	0	0	0	0	0	0	0	0	0	0	0	0	0	0	0	0	d__Bacteria; p__Bacteroidetes; c__Bacteroidia; o__Sphingobacteriales; f__NS11_12_marine_group; g__NS11_12_marine_group_ge
OTU_235	0	0	0	2	0	1	0	3	1	142	1	2	2	8	1	0	0	0	0	0	0	0	0	0	0	0	0	0	0	0	0	0	0	0	0	0	0	0	0	0	0	0	0	0	0	Unclassified
OTU_2350	1	1	2	1	0	0	2	2	4	0	0	0	0	3	1	1	0	0	10	0	0	1	1	0	4	0	1	0	1	0	0	0	0	0	1	0	0	0	0	0	0	1	0	0	0	d__Bacteria; p__Actinobacteria; c__Thermoleophilia; o__Gaiellales; f__uncultured; g__uncultured_ge; s__metagenome
OTU_2351	0	0	0	0	0	0	0	0	0	0	0	0	0	0	0	0	0	0	0	0	0	0	0	0	0	0	0	0	0	0	1	5	3	0	3	0	0	1	0	1	2	0	0	0	0	d__Bacteria
OTU_2352	0	0	0	0	0	1	0	2	0	0	1	0	0	0	0	0	0	0	0	0	0	0	0	0	0	0	0	0	0	0	0	0	0	0	0	0	0	0	0	0	0	0	0	0	0	d__Bacteria; p__FBP; c__FBP_cl; o__FBP_or; f__FBP_fa; g__FBP_ge; s__uncultured_bacterium
OTU_2353	0	3	2	0	0	0	2	1	3	1	0	0	1	0	0	0	0	0	0	1	0	0	0	0	0	0	0	0	0	0	0	0	0	0	0	0	0	0	0	0	0	0	0	0	0	d__Bacteria; p__Chloroflexi; c__Anaerolineae; o__Caldilineales; f__Caldilineaceae; g__uncultured; s__uncultured_bacterium
OTU_2354	1	0	0	1	0	0	1	1	4	0	0	0	1	0	0	0	0	0	1	0	0	0	0	0	0	0	0	0	0	1	0	0	0	0	0	0	0	0	0	0	0	0	0	0	0	d__Bacteria; p__Chloroflexi; c__Anaerolineae; o__SBR1031; f__A4b; g__A4b_ge; s__metagenome
OTU_2355	0	0	0	0	0	0	0	0	0	0	2	0	0	0	0	1	1	3	0	0	0	3	0	1	1	1	0	0	0	4	1	13	2	0	1	1	6	13	3	0	4	0	0	1	2	d__Bacteria; p__Proteobacteria; c__Alphaproteobacteria; o__Caedibacterales; f__Caedibacteraceae; g__Caedibacter; s__uncultured_bacterium
OTU_2356	2	0	1	1	0	1	0	0	1	1	1	2	1	0	0	0	0	0	3	0	0	0	0	0	0	0	0	0	0	0	0	0	0	0	0	0	0	0	0	0	0	0	0	0	0	d__Bacteria; p__Actinobacteria; c__Actinobacteria; o__Corynebacteriales; f__Nocardiaceae; g__Smaragdicoccus; s__uncultured_bacterium
OTU_2357	1	0	3	3	0	0	0	1	2	2	0	1	1	0	1	0	0	0	0	0	0	0	0	0	0	0	2	0	0	0	0	0	0	0	0	0	0	0	0	0	0	0	0	0	0	d__Bacteria; p__Planctomycetes; c__Planctomycetacia; o__Pirellulales; f__Pirellulaceae; g__uncultured
OTU_2358	0	2	0	0	5	0	1	0	1	0	0	0	0	0	0	0	0	0	0	0	0	0	0	0	0	0	0	0	0	0	0	0	0	0	0	0	0	0	0	0	0	0	0	0	0	d__Bacteria; p__Bacteroidetes; c__Bacteroidia; o__Bacteroidales; f__Barnesiellaceae; g__Barnesiella
OTU_2359	4	3	1	0	29	0	2	0	1	103	10	4	16	23	0	0	0	2	0	0	1	1	1	0	1	1	1	2	0	2	5	0	11	1	2	1	21	4	1	2	1	9	4	6	13	d__Bacteria; p__FBP; c__FBP_cl; o__FBP_or; f__FBP_fa; g__FBP_ge
OTU_236	99	46	1	86	34	2	1	1	1	0	0	0	0	1	0	0	0	0	0	0	0	0	0	1	0	0	0	0	0	0	0	0	0	0	0	0	0	0	0	0	0	0	0	0	0	d__Bacteria; p__Bacteroidetes; c__Bacteroidia; o__Bacteroidales; f__Prevotellaceae; g__Prevotella_9; s__uncultured_bacterium
OTU_2360	0	0	2	0	1	0	1	0	0	0	0	0	0	0	0	0	0	0	0	0	0	0	0	0	1	0	0	0	0	0	0	0	0	0	0	0	0	0	0	0	0	0	0	0	0	d__Bacteria; p__Deinococcus_Thermus; c__Deinococci; o__Deinococcales; f__Deinococcaceae; g__Deinococcus
OTU_2362	0	0	0	0	0	0	0	0	2	0	1	0	0	0	0	0	0	0	2	1	1	0	0	0	0	0	0	0	0	0	0	0	0	0	1	0	0	0	0	0	0	0	0	0	0	d__Bacteria; p__Acidobacteria; c__Blastocatellia_Subgroup_4; o__Blastocatellales; f__Blastocatellaceae; g__Blastocatella; s__uncultured_soil_bacterium
OTU_2363	0	0	0	0	0	0	0	0	0	0	0	0	0	0	0	0	0	2	0	0	0	0	0	0	0	0	0	0	0	0	1	0	0	0	0	0	8	5	5	11	4	1	26	3	0	d__Bacteria; p__Planctomycetes; c__Planctomycetacia; o__Isosphaerales; f__Isosphaeraceae
OTU_2364	0	0	3	0	1	3	0	3	2	1	1	2	0	2	0	0	0	0	0	0	0	0	0	0	0	0	0	0	0	0	0	0	0	0	1	0	0	0	0	0	0	0	0	0	0	d__Bacteria; p__Proteobacteria; c__Gammaproteobacteria; o__Betaproteobacteriales; f__TRA3_20; g__TRA3_20_ge; s__uncultured_proteobacterium
OTU_2365	0	1	0	0	2	1	0	0	3	0	0	0	0	0	1	1	0	0	3	0	1	0	0	0	0	0	0	0	0	0	0	0	0	0	0	0	0	0	0	0	0	0	0	0	0	d__Bacteria; p__Actinobacteria; c__Acidimicrobiia; o__Microtrichales; f__uncultured; g__uncultured_ge; s__metagenome
OTU_2367	0	0	0	0	0	0	1	0	2	1	1	2	0	1	0	0	0	0	0	0	0	0	0	0	0	0	0	0	0	0	0	0	0	0	0	0	0	0	0	0	0	0	0	0	0	d__Bacteria
OTU_2369	0	0	0	0	0	0	4	0	0	0	0	0	0	0	0	0	0	1	0	0	3	2	1	0	0	0	2	2	0	0	22	4	1	7	0	0	6	6	1	0	14	8	6	3	5	d__Bacteria; p__Proteobacteria; c__Alphaproteobacteria; o__Acetobacterales; f__Acetobacteraceae; g__Acidiphilium; s__uncultured_bacterium
OTU_2370	0	0	0	0	1	0	1	2	1	0	0	1	1	0	0	0	0	0	1	0	0	0	0	0	0	0	0	0	0	0	0	0	0	0	0	0	0	0	0	0	0	0	0	0	0	d__Bacteria; p__Proteobacteria; c__Gammaproteobacteria; o__JTB23; f__JTB23_fa; g__JTB23_ge; s__metagenome
OTU_2372	0	2	1	0	0	0	0	0	0	1	0	0	0	0	0	0	0	0	0	0	0	0	0	0	0	0	0	0	0	0	0	0	0	0	0	0	0	1	0	0	0	0	0	0	0	d__Bacteria; p__WPS_2; c__WPS_2_cl; o__WPS_2_or; f__WPS_2_fa; g__WPS_2_ge; s__metagenome
OTU_2373	0	0	0	0	0	0	0	0	2	2	0	0	0	0	1	0	0	0	0	0	0	0	0	0	0	0	0	0	0	0	0	0	0	0	0	0	0	0	0	0	0	0	0	0	0	d__Bacteria; p__Firmicutes; c__Clostridia; o__Clostridiales; f__Ruminococcaceae; g__Ruminococcaceae_UCG_013; s__metagenome
OTU_2374	0	0	2	0	0	0	1	0	0	0	0	0	0	0	0	0	0	0	12	0	0	0	0	0	1	1	2	0	1	0	0	0	0	0	0	0	0	0	0	0	0	0	0	0	0	d__Bacteria; p__Proteobacteria; c__Gammaproteobacteria; o__Betaproteobacteriales; f__Nitrosomonadaceae; g__mle1_7
OTU_2375	0	0	0	0	0	0	0	0	0	0	0	0	0	0	0	0	0	1	0	0	0	2	6	2	11	1	2	3	0	0	0	0	0	0	0	0	0	0	0	0	0	0	0	0	0	Unclassified
OTU_2376	0	0	0	0	0	0	0	0	0	0	0	0	0	0	0	0	0	0	0	5	0	0	0	0	0	1	1	0	0	0	0	0	0	0	0	0	0	0	0	0	0	1	0	0	0	d__Bacteria; p__Proteobacteria; c__Gammaproteobacteria; o__Betaproteobacteriales; f__Rhodocyclaceae; g__Denitratisoma
OTU_2377	0	0	0	0	0	0	0	0	0	0	0	0	0	0	0	0	0	0	0	0	0	0	0	0	0	0	0	0	0	0	3	17	11	0	0	0	3	2	1	1	10	1	3	0	2	d__Bacteria; p__Bacteroidetes; c__Bacteroidia; o__Chitinophagales; f__Chitinophagaceae
OTU_2380	1	0	0	0	0	0	2	2	3	0	1	2	1	0	0	0	1	0	0	1	0	1	0	1	0	0	0	0	0	0	0	0	0	0	0	0	0	0	0	0	0	0	0	0	0	d__Bacteria; p__Firmicutes; c__Bacilli; o__Bacillales; f__Paenibacillaceae; g__Paenibacillus
OTU_2381	0	0	1	1	0	1	0	2	2	1	1	0	0	0	2	0	0	0	2	0	0	0	0	0	0	0	0	0	0	0	0	0	0	0	0	0	0	0	0	0	0	0	0	0	0	d__Bacteria; p__Bacteroidetes; c__Bacteroidia; o__Cytophagales; f__Microscillaceae; g__uncultured; s__metagenome
OTU_2383	0	0	1	0	0	0	2	0	0	1	1	0	0	1	0	0	0	0	0	0	0	0	0	0	0	0	0	0	0	0	0	0	0	0	0	0	0	0	0	0	0	0	0	0	0	Unclassified
OTU_2384	0	0	1	0	1	0	0	2	9	3	1	0	2	1	1	0	0	0	0	0	0	0	0	0	0	0	0	0	0	0	0	0	0	0	1	0	0	0	0	0	3	0	0	0	0	d__Bacteria; p__Chloroflexi; c__Chloroflexia; o__Thermomicrobiales; f__JG30_KF_CM45; g__JG30_KF_CM45_ge; s__uncultured_bacterium
OTU_2385	1	0	0	1	0	0	0	0	0	2	0	0	1	0	0	0	0	0	0	0	0	0	0	0	1	0	0	0	0	0	0	0	0	0	0	0	0	0	0	0	0	0	0	0	0	d__Bacteria; p__Planctomycetes; c__Planctomycetacia; o__Gemmatales; f__Gemmataceae; g__uncultured
OTU_2386	1	0	3	0	1	0	0	0	0	2	0	0	0	0	0	0	0	0	1	0	0	0	0	0	0	0	0	0	0	0	0	0	0	0	0	0	0	0	0	0	0	0	0	0	0	d__Bacteria; p__Armatimonadetes; c__Fimbriimonadia; o__Fimbriimonadales; f__Fimbriimonadales_fa; g__Fimbriimonadales_ge; s__uncultured_bacterium
OTU_2387	0	0	0	0	0	0	1	1	1	0	1	0	0	0	0	0	0	0	0	0	0	0	0	0	0	0	0	0	0	0	0	0	0	0	0	0	0	0	0	0	0	0	0	0	0	d__Bacteria; p__Proteobacteria; c__Deltaproteobacteria; o__Myxococcales; f__Blfdi19; g__Blfdi19_ge; s__metagenome
OTU_2389	0	0	1	0	0	0	1	1	0	1	0	0	0	0	0	0	0	0	6	0	0	0	0	0	0	1	0	0	0	0	0	0	0	0	0	0	0	0	0	0	0	0	0	0	0	d__Bacteria; p__Proteobacteria; c__Deltaproteobacteria; o__Myxococcales; f__BIrii41; g__BIrii41_ge; s__uncultured_bacterium
OTU_239	16	22	5	19	30	19	21	34	37	16	14	27	9	13	5	0	0	0	1	1	1	0	1	0	4	2	0	0	0	0	0	0	0	0	0	0	0	0	0	0	0	0	0	0	0	d__Bacteria; p__Actinobacteria; c__Rubrobacteria; o__Rubrobacterales; f__Rubrobacteriaceae; g__Rubrobacter; s__uncultured_bacterium
OTU_2390	0	0	0	0	1	0	0	0	1	0	1	1	1	0	2	0	0	0	0	0	0	0	0	0	0	0	0	0	0	0	0	0	0	0	0	0	0	0	0	0	0	0	0	0	0	d__Bacteria; p__Proteobacteria; c__Deltaproteobacteria; o__Myxococcales; f__mle1_27; g__mle1_27_ge; s__Myxococcales_bacterium_Gsoil_473
OTU_2391	2	2	3	0	0	0	2	0	0	1	1	0	1	0	0	0	0	0	0	0	0	0	0	0	0	0	1	0	0	0	0	0	0	0	0	1	2	0	0	0	0	0	0	0	0	d__Bacteria; p__Firmicutes; c__Bacilli; o__Bacillales; f__Staphylococcaceae; g__Salinicoccus; s__uncultured_bacterium
OTU_2392	0	0	1	2	0	0	0	1	0	0	0	0	0	0	0	0	0	0	0	0	0	0	0	0	0	0	0	0	0	0	0	0	0	0	0	0	0	0	0	0	0	0	0	0	0	d__Bacteria; p__Verrucomicrobia; c__Verrucomicrobiae; o__Pedosphaerales; f__Pedosphaeraceae; g__Pedosphaeraceae_ge; s__uncultured_bacterium
OTU_2393	0	0	0	0	0	0	0	2	1	0	0	0	0	0	0	0	0	0	1	0	0	0	0	0	0	0	0	0	0	0	0	0	0	0	0	0	0	0	0	0	1	0	0	0	0	d__Bacteria; p__Proteobacteria; c__Deltaproteobacteria; o__Myxococcales
OTU_2394	0	0	1	0	0	3	2	0	2	0	0	0	0	0	0	0	0	0	3	0	0	0	0	0	0	0	0	0	0	0	0	0	0	0	0	0	0	0	0	0	0	0	0	0	0	d__Bacteria; p__Proteobacteria; c__Deltaproteobacteria; o__NB1_j; f__NB1_j_fa; g__NB1_j_ge
OTU_2395	0	0	0	0	0	0	0	0	0	0	0	0	0	0	0	0	0	0	0	0	0	0	0	0	0	0	0	0	0	0	0	0	2	0	0	0	6	3	0	0	2	1	0	0	0	d__Bacteria; p__Bacteroidetes; c__Bacteroidia; o__Cytophagales; f__Spirosomaceae; g__Spirosoma
OTU_2396	1	0	0	0	0	0	0	1	1	1	0	1	0	2	0	0	0	0	1	0	0	0	0	0	0	0	0	0	0	0	0	0	0	0	0	2	0	0	1	0	0	1	0	0	1	d__Bacteria; p__Proteobacteria; c__Deltaproteobacteria; o__Myxococcales
OTU_2397	1	2	0	0	0	0	1	2	3	1	2	1	0	1	1	0	0	0	0	0	0	0	0	0	0	0	0	0	0	0	0	0	0	0	0	0	0	0	0	0	0	0	0	0	0	d__Bacteria; p__Bacteroidetes; c__Bacteroidia; o__Cytophagales; f__Cyclobacteriaceae; g__uncultured; s__metagenome
OTU_2398	1	3	5	0	0	1	9	3	11	4	2	6	4	3	0	0	0	0	4	0	0	0	0	0	0	0	0	0	0	0	0	0	0	0	0	0	0	0	0	0	0	0	0	0	0	d__Bacteria; p__Proteobacteria; c__Gammaproteobacteria; o__Xanthomonadales; f__Rhodanobacteraceae; g__uncultured
OTU_2400	0	0	0	0	0	0	4	0	0	0	0	1	0	0	0	0	0	0	3	0	0	0	0	0	0	0	0	0	0	0	0	0	0	0	0	0	0	0	0	0	0	0	0	0	0	d__Bacteria; p__Proteobacteria; c__Deltaproteobacteria; o__Desulfarculales; f__Desulfarculaceae; g__uncultured; s__uncultured_delta_proteobacterium
OTU_2401	0	1	0	0	0	0	1	0	2	1	0	0	2	0	0	0	0	0	0	0	0	0	0	0	0	1	0	0	0	0	0	0	0	0	0	0	0	0	0	0	1	0	0	0	0	d__Bacteria; p__Planctomycetes; c__Planctomycetacia; o__Gemmatales; f__Gemmataceae
OTU_2402	0	0	0	0	0	0	1	0	4	1	0	0	0	0	0	0	0	0	0	0	0	0	0	0	0	0	0	0	0	0	0	0	0	0	0	0	0	0	0	0	0	0	0	0	0	d__Bacteria; p__Planctomycetes; c__Planctomycetacia; o__Pirellulales; f__Pirellulaceae; g__Pir4_lineage; s__planctomycete_str._292
OTU_2403	1	0	0	0	0	0	0	0	4	1	1	1	1	0	0	0	1	0	6	1	1	0	0	0	0	0	1	0	0	0	0	0	0	0	0	0	0	0	0	0	0	0	0	0	0	d__Bacteria; p__Chloroflexi; c__TK10; o__TK10_or; f__TK10_fa; g__TK10_ge; s__uncultured_soil_bacterium
OTU_2404	0	1	0	1	1	1	1	0	1	1	1	1	2	0	0	0	0	0	0	0	0	0	0	0	0	0	0	0	0	0	0	0	0	0	0	0	0	0	0	0	0	0	0	0	0	d__Bacteria; p__Chloroflexi; c__TK10; o__TK10_or; f__TK10_fa; g__TK10_ge; s__uncultured_Dehalogenimonas_sp.
OTU_2407	0	0	0	0	0	0	0	0	9	0	0	0	0	0	0	0	0	0	0	0	0	0	0	0	0	0	0	0	0	0	0	0	0	0	0	0	0	0	0	0	0	0	0	0	0	d__Bacteria; p__Bacteroidetes; c__Bacteroidia; o__Flavobacteriales; f__Flavobacteriaceae
OTU_2408	0	2	0	1	0	1	1	1	15	5	0	7	8	1	9	0	0	0	2	0	1	1	0	0	0	1	0	0	0	0	1	0	0	0	0	0	2	1	0	2	0	0	1	0	0	d__Bacteria; p__Actinobacteria; c__Thermoleophilia; o__Solirubrobacterales; f__67_14; g__67_14_ge; s__metagenome
OTU_2409	0	1	0	1	1	0	2	0	1	0	0	0	0	1	0	0	0	0	1	1	0	0	0	0	0	0	0	0	0	0	0	0	0	0	0	0	0	0	0	0	0	0	0	0	0	d__Bacteria; p__Acidobacteria; c__Subgroup_6; o__Subgroup_6_or; f__Subgroup_6_fa; g__Subgroup_6_ge
OTU_2410	0	1	0	18	1	0	0	1	0	0	0	0	1	0	1	0	0	19	0	0	14	0	0	0	1	0	5	0	1	0	0	0	0	0	0	0	2	0	5	0	2	0	12	5	20	d__Bacteria; p__Verrucomicrobia; c__Verrucomicrobiae; o__Chthoniobacterales; f__Chthoniobacteraceae; g__Chthoniobacter; s__bacterium_Ellin506
OTU_2411	0	0	0	0	0	0	0	0	0	0	0	0	0	0	0	0	0	0	0	0	0	0	0	0	0	0	0	0	0	0	0	1	1	0	0	0	1	0	0	0	0	0	1	24	11	d__Bacteria
OTU_2412	0	3	0	1	5	0	1	0	0	4	4	1	1	0	0	9	4	16	2	125	109	421	127	3	307	153	178	27	20	264	1	43	2	4	1	0	0	1	29	2	8	1	5	63	16	d__Bacteria; p__Bacteroidetes; c__Bacteroidia; o__Cytophagales; f__Hymenobacteraceae; g__Hymenobacter; s__Hymenobacter_sp._16F3Y_2
OTU_2413	1	3	0	0	0	0	2	2	3	0	0	0	0	0	0	0	0	0	0	0	0	0	0	0	0	0	0	0	0	0	0	0	0	0	0	0	0	0	0	0	0	0	0	0	0	d__Bacteria; p__Proteobacteria; c__Deltaproteobacteria; o__Myxococcales; f__Sandaracinaceae; g__Sandaracinus
OTU_2414	0	0	0	0	0	0	0	0	0	0	0	0	0	0	0	0	1	0	1	3	4	0	1	9	6	2	5	0	0	0	0	0	0	2	0	0	0	0	0	0	2	0	0	0	0	Unclassified
OTU_2415	0	1	3	1	0	0	4	4	2	5	1	1	0	1	2	2	0	0	4	2	3	1	0	0	0	3	1	0	1	0	34	4	8	0	0	1	1	0	3	4	3	3	3	0	21	d__Bacteria; p__Proteobacteria; c__Alphaproteobacteria; o__Caulobacterales; f__Caulobacteraceae; g__uncultured; s__uncultured_bacterium
OTU_2417	1	0	1	1	3	0	3	1	6	4	0	4	1	1	2	0	0	4	17	0	6	1	0	3	9	5	7	0	2	2	1	3	0	0	5	1	1	0	0	0	0	0	0	2	1	d__Bacteria; p__Actinobacteria; c__Actinobacteria; o__Propionibacteriales; f__Nocardioidaceae
OTU_2418	0	0	1	1	1	0	0	0	0	0	0	0	0	2	1	0	0	0	1	1	0	0	0	0	2	0	3	0	0	0	0	1	0	4	0	0	0	0	0	1	3	0	0	0	0	d__Bacteria; p__Proteobacteria; c__Alphaproteobacteria; o__Rhizobiales
OTU_2419	1	2	1	0	1	0	2	1	2	3	1	2	1	0	0	0	0	0	0	0	0	0	0	0	0	0	0	0	0	0	0	0	0	0	0	0	0	0	0	0	0	0	0	0	0	d__Bacteria; p__Bacteroidetes; c__Bacteroidia
OTU_242	0	0	0	1	3	1	0	0	0	0	2	0	5	127	0	5	1	9	0	2	8	9	5	1	0	0	5	0	3	3	0	0	0	0	2	0	13	2	25	2	28	1	43	381	51	d__Bacteria; p__Bacteroidetes; c__Bacteroidia; o__Cytophagales; f__Spirosomaceae; g__Fibrella; s__Fibrella_sp._ES10_3_2_2
OTU_2420	0	0	0	0	0	0	0	0	0	0	0	0	0	0	0	0	0	0	13	3	1	1	1	0	4	1	2	0	1	0	0	0	0	0	0	0	0	0	0	0	0	0	0	0	0	d__Bacteria; p__Actinobacteria; c__Actinobacteria; o__Frankiales; f__Sporichthyaceae; g__uncultured; s__uncultured_bacterium
OTU_2421	0	0	5	1	0	2	1	1	16	6	0	1	7	1	1	0	0	0	0	0	0	0	0	0	0	0	0	0	0	0	0	0	0	0	0	0	0	0	0	0	0	0	0	0	0	d__Bacteria; p__Chloroflexi; c__Anaerolineae; o__Anaerolineales; f__Anaerolineaceae; g__UTCFX1
OTU_2422	0	0	0	1	0	1	1	0	1	1	1	0	1	4	0	0	0	0	0	0	0	0	0	0	0	0	0	0	0	0	0	0	0	0	0	0	0	0	0	0	0	0	0	0	0	d__Bacteria; p__Proteobacteria; c__Deltaproteobacteria; o__Myxococcales; f__Blfdi19; g__Blfdi19_ge
OTU_2423	9	20	24	10	12	15	8	13	35	10	9	2	7	4	5	0	0	0	1	0	0	0	0	0	0	0	0	0	0	0	0	0	0	0	1	0	0	0	0	1	0	0	0	0	0	d__Bacteria; p__Proteobacteria; c__Gammaproteobacteria; o__Betaproteobacteriales; f__Nitrosomonadaceae; g__MND1
OTU_2424	0	0	0	0	0	0	0	0	0	0	0	0	0	0	0	0	0	5	0	0	0	4	0	0	0	2	0	2	0	2	0	12	0	1	1	6	4	4	0	0	5	0	3	2	19	d__Bacteria; p__Armatimonadetes; c__Fimbriimonadia; o__Fimbriimonadales; f__Fimbriimonadaceae; g__Fimbriimonadaceae_ge
OTU_2425	0	0	2	0	0	0	1	0	1	0	0	0	0	0	0	0	0	0	0	0	0	0	0	0	0	0	0	0	0	0	0	0	0	0	0	0	0	0	0	0	0	0	0	0	0	d__Bacteria; p__Firmicutes; c__Clostridia; o__Clostridiales; f__Ruminococcaceae; g__Butyricicoccus; s__uncultured_bacterium
OTU_2426	0	0	0	0	2	1	1	0	2	0	0	0	1	0	2	0	0	0	2	0	0	0	0	0	0	0	0	0	0	0	0	0	0	0	0	0	0	0	0	0	0	0	0	0	0	d__Bacteria; p__Proteobacteria; c__Alphaproteobacteria; o__uncultured; f__uncultured_fa; g__uncultured_ge; s__uncultured_Stella_sp.
OTU_2427	0	0	0	0	0	0	0	0	0	0	0	0	0	0	0	0	0	0	1	0	0	0	0	0	15	1	0	0	0	0	0	0	0	0	0	0	0	0	0	0	0	0	0	0	0	d__Bacteria; p__Proteobacteria; c__Deltaproteobacteria; o__Oligoflexales; f__0319_6G20; g__0319_6G20_ge
OTU_2428	0	1	2	0	1	1	0	0	1	0	0	0	1	1	1	0	0	0	0	0	0	0	0	0	0	0	0	0	0	0	0	0	0	0	0	0	0	0	0	0	0	0	0	0	0	d__Bacteria; p__Actinobacteria; c__0319_7L14; o__0319_7L14_or; f__0319_7L14_fa; g__0319_7L14_ge
OTU_2429	0	1	1	0	0	0	0	1	1	0	0	0	0	0	1	0	0	0	1	0	1	0	0	0	0	0	0	0	0	0	0	0	0	0	0	0	0	0	0	0	0	0	0	0	0	d__Bacteria; p__Actinobacteria; c__Acidimicrobiia; o__uncultured; f__uncultured_fa; g__uncultured_ge
OTU_243	28	25	23	23	38	18	54	44	89	66	51	49	45	10	29	2	1	3	36	3	10	9	2	2	24	13	11	1	4	2	3	2	1	74	2	1	0	1	1	1	21	4	0	4	4	d__Bacteria; p__Actinobacteria; c__Actinobacteria; o__Pseudonocardiales; f__Pseudonocardiaceae; g__Pseudonocardia; s__uncultured_Pseudonocardia_sp.
OTU_2430	0	0	0	0	0	1	1	2	5	0	1	0	0	0	0	0	0	0	0	0	0	0	0	0	0	0	0	0	0	0	0	0	0	0	0	0	0	0	0	0	0	0	0	0	0	d__Bacteria; p__Planctomycetes; c__Phycisphaerae; o__Tepidisphaerales
OTU_2431	0	1	2	1	0	0	1	1	1	1	0	0	0	1	0	0	0	0	0	0	0	0	0	0	0	0	0	0	0	0	0	0	0	0	0	0	0	0	0	0	0	0	0	0	0	d__Bacteria; p__Actinobacteria; c__Acidimicrobiia
OTU_2432	0	1	1	0	0	0	0	0	1	0	0	0	0	1	0	0	0	0	0	0	0	0	0	0	0	0	0	0	0	0	0	0	0	0	0	0	0	0	0	0	0	0	0	0	0	d__Bacteria; p__Patescibacteria; c__Parcubacteria
OTU_2433	1	0	1	1	1	2	3	0	1	1	0	0	0	0	0	0	0	0	0	0	0	0	0	0	0	0	0	0	0	0	0	0	0	0	0	0	0	0	0	0	0	0	0	0	0	d__Bacteria; p__Acidobacteria; c__Subgroup_25; o__Subgroup_25_or; f__Subgroup_25_fa; g__Subgroup_25_ge; s__uncultured_bacterium
OTU_2434	0	0	0	0	0	0	1	0	1	0	3	0	0	0	0	1	0	0	1	0	0	1	0	0	0	0	0	0	0	0	0	0	0	0	1	0	0	0	0	0	0	0	0	0	0	d__Bacteria; p__Planctomycetes; c__Planctomycetacia; o__Pirellulales; f__Pirellulaceae; g__Pirellula; s__Pasteuria_sp._LX5
OTU_2435	0	0	0	0	0	0	0	0	0	0	0	0	0	1	22	0	0	0	0	0	0	0	0	0	0	0	0	0	0	0	0	0	0	0	0	0	0	0	0	0	0	0	0	0	0	d__Bacteria; p__Actinobacteria; c__Actinobacteria; o__Propionibacteriales; f__Propionibacteriaceae; g__Propioniciclava
OTU_2436	1	0	0	0	0	0	0	0	1	2	1	0	1	0	0	0	0	0	0	0	0	0	0	0	0	0	0	0	0	0	0	0	0	0	0	0	0	0	0	0	0	0	0	0	0	d__Bacteria; p__Verrucomicrobia; c__Verrucomicrobiae; o__UA11; f__UA11_fa; g__UA11_ge; s__uncultured_bacterium
OTU_2437	0	1	0	0	0	1	0	0	1	0	0	1	1	0	1	0	0	0	0	0	0	0	0	0	0	0	0	0	0	0	0	0	0	0	0	0	0	0	0	0	0	0	0	0	0	d__Bacteria; p__Planctomycetes; c__Planctomycetacia; o__uncultured; f__uncultured_fa; g__uncultured_ge
OTU_2438	0	0	1	1	0	1	0	0	0	4	0	0	1	0	0	0	0	1	0	0	0	0	0	0	0	0	0	0	1	1	0	0	0	0	0	0	1	0	0	0	6	0	0	0	0	d__Bacteria; p__Bacteroidetes; c__Bacteroidia; o__Chitinophagales; f__Chitinophagaceae; g__uncultured
OTU_244	8	10	5	17	13	16	13	44	6	24	17	34	12	3	2	0	0	1	2	1	1	0	0	0	1	1	2	0	0	0	0	0	0	0	0	0	0	0	0	5	1	0	0	0	0	d__Bacteria; p__Gemmatimonadetes; c__Gemmatimonadetes; o__Gemmatimonadales; f__Gemmatimonadaceae; g__Gemmatirosa; s__uncultured_bacterium
OTU_2440	0	0	0	0	0	0	0	2	2	0	1	1	0	0	0	0	0	0	0	0	0	0	0	0	0	0	0	0	0	0	0	0	0	0	0	0	0	0	0	0	0	0	0	0	0	d__Bacteria; p__Planctomycetes; c__Phycisphaerae; o__Phycisphaerales; f__Phycisphaeraceae; g__AKYG587; s__uncultured_bacterium
OTU_2441	0	0	0	0	0	3	0	1	1	0	2	2	0	0	0	0	0	0	0	0	0	0	0	0	0	2	0	0	0	0	0	0	0	1	0	0	0	0	0	0	0	0	0	0	0	d__Bacteria; p__Chloroflexi; c__Chloroflexia; o__Thermomicrobiales; f__JG30_KF_CM45; g__JG30_KF_CM45_ge; s__uncultured_soil_bacterium
OTU_2443	0	1	0	0	1	0	1	2	1	1	0	0	1	1	1	0	0	0	0	0	0	0	0	0	0	0	0	0	0	0	0	0	0	0	1	0	0	0	0	0	0	0	0	0	0	d__Bacteria; p__Chloroflexi; c__Chloroflexia; o__Chloroflexales; f__Roseiflexaceae; g__uncultured; s__uncultured_Chloroflexi_bacterium
OTU_2444	2	0	0	1	0	1	0	2	3	0	0	0	0	1	0	0	0	0	0	0	0	0	0	0	0	0	1	0	0	0	0	0	0	0	0	0	0	0	0	0	0	0	0	0	0	d__Bacteria; p__Armatimonadetes; c__Fimbriimonadia; o__Fimbriimonadales; f__Fimbriimonadaceae; g__Fimbriimonadaceae_ge; s__metagenome
OTU_2445	0	1	0	1	0	1	0	1	0	0	0	0	1	0	0	0	0	0	0	0	0	0	0	0	0	0	0	0	0	0	0	0	0	0	0	0	0	0	0	0	0	0	0	0	0	d__Bacteria; p__Gemmatimonadetes; c__Longimicrobia; o__Longimicrobiales; f__Longimicrobiaceae; g__Longimicrobiaceae_ge
OTU_2446	0	1	1	0	0	1	0	0	0	3	0	0	2	1	1	0	0	0	0	0	1	0	0	0	0	0	1	0	0	0	0	0	0	0	0	0	0	0	0	0	0	0	0	0	0	d__Bacteria; p__Planctomycetes; c__Planctomycetacia; o__Gemmatales; f__Gemmataceae; g__uncultured
OTU_2447	0	0	0	1	0	0	0	0	0	0	0	1	1	0	0	0	0	0	0	0	0	0	0	0	0	0	0	0	0	0	0	0	0	0	0	0	0	0	0	0	0	0	0	0	0	d__Bacteria; p__Patescibacteria; c__Microgenomatia
OTU_2448	1	0	0	0	0	0	1	0	0	1	0	0	0	0	0	0	0	0	0	0	0	0	0	1	0	0	0	0	0	0	0	0	0	0	0	0	0	0	0	0	0	0	0	0	0	d__Bacteria; p__Proteobacteria; c__Alphaproteobacteria; o__Rhizobiales; f__Beijerinckiaceae; g__uncultured; s__uncultured_endolithic_bacterium
OTU_2449	0	0	0	0	0	0	0	0	0	0	1	0	0	3	0	0	0	0	1	2	0	0	0	0	1	0	1	0	0	0	0	0	0	1	0	0	0	2	0	0	0	4	0	0	1	Unclassified
OTU_245	37	41	48	20	32	31	63	64	109	54	36	40	33	28	35	0	0	0	8	4	0	0	0	0	2	2	1	0	0	0	2	0	0	0	0	0	0	0	0	0	0	0	0	0	0	d__Bacteria; p__Acidobacteria; c__Holophagae; o__Subgroup_7; f__Subgroup_7_fa; g__Subgroup_7_ge; s__metagenome
OTU_2450	0	0	0	4	2	0	0	0	0	0	0	0	0	0	0	0	0	0	0	0	0	0	0	0	0	0	0	0	0	0	0	0	0	0	0	0	0	0	0	0	0	0	0	0	0	Unclassified
OTU_2451	0	0	0	0	0	0	3	0	0	1	0	0	0	0	1	0	0	0	0	0	0	1	0	0	1	0	2	0	0	0	0	0	0	0	0	0	0	0	0	0	0	0	0	0	0	Unclassified
OTU_2452	1	0	0	0	0	0	0	0	1	0	2	0	1	0	0	0	0	0	0	0	0	0	0	0	0	0	0	0	0	0	0	0	0	0	0	0	0	0	0	0	0	0	0	0	0	d__Bacteria; p__FBP; c__FBP_cl; o__FBP_or; f__FBP_fa; g__FBP_ge; s__uncultured_bacterium
OTU_2453	0	1	1	0	0	0	1	0	0	0	0	1	0	0	0	0	0	0	0	0	0	0	0	0	0	0	0	0	0	0	0	0	0	0	0	0	0	0	0	0	0	0	0	0	0	d__Bacteria; p__Chloroflexi; c__Chloroflexia; o__Chloroflexales; f__Roseiflexaceae; g__uncultured; s__uncultured_bacterium
OTU_2454	2	5	6	0	4	1	3	9	13	5	4	2	4	4	3	0	0	0	0	0	0	0	0	0	0	0	0	0	0	0	0	0	0	0	0	0	0	0	0	0	0	0	0	0	0	d__Bacteria; p__Acidobacteria; c__Holophagae; o__Subgroup_7; f__Subgroup_7_fa; g__Subgroup_7_ge
OTU_2455	0	0	3	0	1	5	1	1	1	3	1	0	0	1	0	0	0	0	5	5	0	0	0	0	1	2	2	0	0	0	0	0	0	0	0	0	1	0	0	0	0	0	0	0	0	d__Bacteria; p__Acidobacteria; c__Subgroup_6; o__Subgroup_6_or; f__Subgroup_6_fa; g__Subgroup_6_ge
OTU_2456	0	3	0	0	2	0	3	1	6	3	0	1	1	0	0	0	0	0	1	0	0	0	0	0	0	0	1	0	0	0	0	0	0	0	1	0	0	0	0	0	0	0	0	0	0	d__Bacteria; p__Planctomycetes; c__Phycisphaerae; o__Tepidisphaerales; f__WD2101_soil_group; g__WD2101_soil_group_ge; s__uncultured_bacterium
OTU_2457	0	1	1	0	1	0	0	1	3	0	0	0	0	0	0	0	0	0	39	4	1	2	0	0	3	2	8	0	0	0	0	1	0	0	5	0	0	0	0	0	0	1	0	0	0	d__Bacteria; p__Actinobacteria; c__Thermoleophilia; o__Gaiellales; f__uncultured; g__uncultured_ge
OTU_2458	0	0	1	0	0	1	2	2	1	1	1	0	2	0	0	0	0	0	1	0	0	0	0	0	0	0	0	0	0	0	0	0	0	0	0	0	0	0	0	1	0	0	0	0	0	d__Bacteria; p__Proteobacteria; c__Deltaproteobacteria; o__Myxococcales; f__Haliangiaceae; g__Haliangium
OTU_246	70	12	7	2	40	4	7	2	3	13	4	5	1	6	2	0	0	0	0	0	0	0	0	0	0	0	0	0	0	0	0	0	0	0	1	0	0	0	0	0	0	0	0	0	0	d__Bacteria
OTU_2460	1	13	2	3	1	0	1	0	0	0	2	1	0	1	0	0	0	0	0	0	0	0	0	0	1	0	1	0	0	0	0	0	0	0	0	0	0	0	0	0	0	0	0	0	0	d__Bacteria; p__Actinobacteria; c__Actinobacteria; o__Micrococcales
OTU_2461	1	0	2	1	1	1	0	0	0	1	0	0	1	0	0	0	0	0	2	0	0	0	0	0	0	0	1	0	0	0	1	0	0	0	3	0	0	0	0	0	0	0	0	0	0	d__Bacteria; p__Latescibacteria; c__Latescibacteria_cl; o__Latescibacteria_or; f__Latescibacteria_fa; g__Latescibacteria_ge
OTU_2463	0	0	1	0	0	1	2	1	0	0	1	0	2	0	0	0	0	0	0	0	0	0	0	0	1	0	0	0	0	0	0	0	0	0	0	0	0	0	0	0	0	0	0	0	0	d__Bacteria; p__Armatimonadetes; c__Fimbriimonadia; o__Fimbriimonadales; f__Fimbriimonadaceae; g__Fimbriimonadaceae_ge; s__uncultured_bacterium
OTU_2465	1	2	1	0	3	0	1	4	2	1	0	0	3	0	0	1	0	0	22	1	1	1	0	0	3	3	2	0	0	0	0	0	0	0	5	0	0	0	0	0	0	0	0	0	0	d__Bacteria; p__Actinobacteria; c__Thermoleophilia; o__Solirubrobacterales; f__67_14; g__67_14_ge
OTU_2467	0	0	0	0	2	0	1	0	1	0	0	0	0	0	1	0	0	0	0	0	0	0	0	0	0	0	0	0	0	0	0	0	0	0	0	0	0	0	0	0	0	0	0	0	0	d__Bacteria; p__Gemmatimonadetes; c__Longimicrobia; o__Longimicrobiales; f__Longimicrobiaceae; g__Longimicrobiaceae_ge; s__uncultured_bacterium
OTU_2468	0	0	0	0	0	0	0	0	0	0	0	0	0	1	1	0	0	0	1	0	19	0	0	0	0	0	4	0	0	0	0	0	0	0	0	0	0	0	0	0	0	0	0	0	0	d__Bacteria; p__Patescibacteria; c__Saccharimonadia; o__Saccharimonadales; f__Saccharimonadaceae; g__Saccharimonadaceae_ge; s__uncultured_bacterium
OTU_2469	0	0	0	1	0	0	0	0	1	1	0	0	1	0	1	0	0	0	0	0	0	0	0	0	0	0	0	0	0	0	0	0	0	0	0	0	0	0	0	0	0	0	0	0	0	d__Bacteria; p__Proteobacteria; c__Alphaproteobacteria; o__uncultured; f__uncultured_fa; g__uncultured_ge; s__metagenome
OTU_247	0	0	0	0	0	0	0	0	0	1	0	0	0	0	0	0	0	0	0	0	1	2	6	0	0	0	1	0	1	2	469	322	166	64	36	13	93	84	39	123	178	131	3	3	0	d__Bacteria; p__Proteobacteria; c__Alphaproteobacteria; o__Sphingomonadales; f__Sphingomonadaceae; g__Sphingoaurantiacus
OTU_2470	0	1	0	0	0	0	1	0	1	1	0	1	1	1	0	0	0	0	0	1	0	0	0	0	0	0	0	0	0	0	0	0	0	0	1	0	0	0	0	0	0	0	0	0	0	d__Bacteria; p__Verrucomicrobia; c__Verrucomicrobiae; o__Opitutales; f__Opitutaceae
OTU_2471	0	1	0	0	1	1	1	1	0	0	0	0	2	0	0	0	0	0	0	0	0	0	0	0	0	0	0	0	0	0	0	0	0	0	0	0	0	0	0	0	0	0	0	0	0	d__Bacteria; p__Gemmatimonadetes; c__BD2_11_terrestrial_group; o__BD2_11_terrestrial_group_or; f__BD2_11_terrestrial_group_fa; g__BD2_11_terrestrial_group_ge
OTU_2472	0	0	0	0	0	0	1	1	0	1	0	0	0	0	0	0	0	0	0	0	0	0	0	0	0	0	1	0	0	1	0	0	0	0	0	0	0	0	0	0	0	0	0	0	0	d__Bacteria; p__Proteobacteria; c__Alphaproteobacteria; o__Sphingomonadales; f__Sphingomonadaceae
OTU_2473	0	0	0	0	2	0	0	1	0	2	0	0	0	0	0	0	1	7	0	0	0	0	0	0	0	0	0	0	0	0	0	0	0	0	0	0	1	0	0	0	1	0	3	0	0	d__Bacteria; p__Planctomycetes; c__Phycisphaerae; o__Tepidisphaerales; f__WD2101_soil_group; g__WD2101_soil_group_ge; s__uncultured_planctomycete
OTU_2474	16	20	17	14	13	8	47	19	40	34	13	14	20	14	20	980	1523	843	414	380	947	683	802	264	498	268	206	560	106	370	21	53	4	22	11	11	14	4	26	11	7	8	48	254	354	d__Bacteria; p__Proteobacteria; c__Gammaproteobacteria; o__Betaproteobacteriales; f__Burkholderiaceae
OTU_2475	1	1	1	1	1	0	2	2	6	4	1	1	1	3	0	0	0	0	5	5	0	0	0	0	1	0	6	0	0	0	0	0	0	0	1	0	1	1	0	0	2	0	0	0	0	d__Bacteria; p__Planctomycetes; c__Planctomycetacia; o__Gemmatales; f__Gemmataceae; g__Gemmata
OTU_2476	1	0	0	0	0	1	0	0	2	0	0	0	0	1	0	0	0	0	3	0	0	0	0	0	1	0	0	0	0	0	0	0	0	0	0	0	0	0	0	0	0	1	0	0	0	d__Bacteria; p__Patescibacteria; c__Saccharimonadia; o__Saccharimonadales; f__Saccharimonadales_fa; g__Saccharimonadales_ge
OTU_2477	0	0	0	0	0	0	0	0	0	0	0	0	1	0	0	0	0	0	0	0	0	0	0	0	0	0	0	0	0	0	5	10	1	0	0	0	0	0	18	9	7	2	0	0	0	d__Bacteria
OTU_2478	0	0	0	0	0	0	1	3	4	0	0	0	0	0	0	0	0	0	0	0	0	0	0	0	0	0	0	0	0	0	0	0	0	0	0	0	0	0	0	0	0	0	0	0	0	d__Bacteria; p__Planctomycetes; c__Phycisphaerae; o__Tepidisphaerales; f__WD2101_soil_group; g__WD2101_soil_group_ge; s__uncultured_bacterium
OTU_2479	0	0	0	0	0	0	1	0	0	0	0	0	0	1	0	4	0	0	2	1	0	0	0	1	4	3	1	0	0	0	0	8	0	0	0	0	0	2	0	0	0	1	0	16	10	d__Bacteria; p__Proteobacteria
OTU_248	41	5	0	7	29	25	1	14	4	46	25	39	2	1	1	0	0	0	0	0	0	0	0	0	0	0	0	0	0	0	0	0	0	0	0	0	0	0	0	0	0	0	0	0	0	d__Bacteria; p__Bacteroidetes; c__Bacteroidia; o__Cytophagales
OTU_2480	5	3	6	4	5	4	13	12	21	4	12	8	9	2	3	0	0	4	15	3	24	3	1	2	5	0	5	0	2	0	3	9	0	4	4	2	11	3	1	2	30	0	15	3	3	d__Bacteria; p__Actinobacteria; c__Actinobacteria; o__Micromonosporales; f__Micromonosporaceae; g__Asanoa
OTU_2482	0	0	0	0	0	0	1	0	0	1	0	1	0	0	1	0	0	0	0	1	0	0	0	0	0	0	0	0	0	0	0	0	0	0	0	0	0	0	0	0	0	0	0	0	0	d__Bacteria; p__Firmicutes; c__Bacilli; o__Lactobacillales; f__Lactobacillaceae; g__Lactobacillus
OTU_2483	3	16	3	7	9	9	14	6	10	6	3	6	3	6	3	2	0	0	56	3	0	2	0	2	5	6	9	0	0	0	1	0	0	0	22	0	0	0	0	1	0	0	0	0	0	d__Bacteria; p__Actinobacteria; c__Thermoleophilia; o__Gaiellales; f__Gaiellaceae; g__Gaiella
OTU_2484	0	0	0	0	0	0	0	0	0	0	0	0	0	0	0	0	0	0	0	0	0	0	0	0	0	0	0	0	0	0	0	0	0	0	0	10	0	0	0	0	0	0	0	0	0	d__Bacteria; p__Proteobacteria; c__Alphaproteobacteria; o__Micavibrionales
OTU_2485	0	0	0	1	2	0	2	0	1	3	0	0	2	0	0	0	0	0	12	6	2	1	0	0	0	1	0	0	0	0	0	0	0	0	1	0	1	0	0	0	0	0	0	0	0	d__Bacteria; p__Acidobacteria; c__Subgroup_6
OTU_2486	1	0	0	0	0	0	0	0	0	0	1	0	0	0	0	0	0	0	1	0	0	0	0	0	0	0	0	0	0	0	0	0	0	0	0	0	0	0	0	0	0	0	0	0	0	d__Bacteria; p__Proteobacteria; c__Deltaproteobacteria; o__Myxococcales; f__Sandaracinaceae; g__Sandaracinus
OTU_2487	0	0	0	0	0	0	0	0	0	0	0	0	0	0	0	0	0	0	0	0	0	1	0	0	0	1	0	0	0	0	1	8	0	0	0	0	1	1	3	0	1	0	2	2	2	d__Bacteria; p__Bacteroidetes; c__Bacteroidia; o__Cytophagales; f__Hymenobacteraceae; g__Hymenobacter
OTU_2488	0	1	4	1	0	0	2	2	1	1	0	0	1	1	1	0	0	0	8	0	0	1	0	0	2	1	2	0	0	0	0	0	0	0	1	0	0	0	0	0	0	0	0	0	0	d__Bacteria; p__Acidobacteria; c__Blastocatellia_Subgroup_4; o__Blastocatellales; f__Blastocatellaceae; g__JGI_0001001_H03; s__uncultured_bacterium
OTU_2489	0	0	0	0	0	0	0	0	0	0	0	0	0	0	0	0	0	0	0	0	0	0	0	0	0	0	0	0	0	0	0	0	0	0	0	0	0	0	0	1	2	0	0	0	0	d__Bacteria; p__Bacteroidetes; c__Bacteroidia; o__Bacteroidales; f__Muribaculaceae; g__Muribaculaceae_ge
OTU_249	51	91	18	50	100	36	32	34	13	117	105	36	38	10	4	13	0	8	8	4	24	46	23	4	12	9	11	22	1	11	6	19	0	42	0	0	5	4	0	6	10	1	8	8	6	d__Bacteria; p__Proteobacteria; c__Alphaproteobacteria; o__Acetobacterales; f__Acetobacteraceae; g__Belnapia; s__Belnapia_moabensis
OTU_2490	0	0	0	0	0	0	0	0	0	0	0	0	0	0	0	0	0	0	0	0	0	0	0	0	0	0	0	0	0	0	0	2	0	0	0	0	0	0	0	0	0	0	0	0	3	d__Bacteria; p__Proteobacteria
OTU_2491	0	1	1	0	1	0	1	1	1	2	0	0	2	0	0	0	0	0	16	1	0	0	0	0	0	0	0	0	0	0	0	0	0	0	2	0	0	0	0	0	0	0	0	0	0	d__Bacteria; p__Actinobacteria; c__Thermoleophilia; o__Gaiellales
OTU_2492	0	0	0	0	2	1	0	0	0	0	2	0	1	1	1	0	0	0	2	0	0	0	0	1	0	0	1	0	0	0	0	0	0	0	0	0	0	0	0	0	0	0	0	0	0	d__Bacteria; p__Proteobacteria; c__Alphaproteobacteria; o__Caulobacterales; f__Hyphomonadaceae; g__SWB02; s__metagenome
OTU_2493	0	0	0	0	0	0	0	0	0	0	0	0	0	0	0	0	0	0	0	8	0	1	0	0	0	0	0	0	0	0	0	0	0	0	0	0	0	0	0	0	0	0	0	0	0	d__Bacteria; p__Proteobacteria; c__Gammaproteobacteria
OTU_2494	0	0	0	0	1	0	0	0	2	2	0	0	1	0	0	0	0	0	0	0	0	0	0	0	0	0	0	0	0	0	0	0	0	0	0	0	0	0	0	0	0	0	0	0	0	d__Bacteria; p__Planctomycetes; c__Phycisphaerae; o__Phycisphaerales; f__Phycisphaeraceae; g__SM1A02; s__metagenome
OTU_2496	0	0	1	0	0	0	1	3	2	0	0	0	1	0	0	0	0	0	0	0	0	0	0	0	0	0	0	0	0	0	0	0	0	0	0	0	0	0	0	0	0	0	0	0	0	d__Bacteria; p__Firmicutes; c__Clostridia; o__Clostridiales; f__Lachnospiraceae; g__Lachnospiraceae_ge; s__Ruminococcus_lactaris_CC59_002D
OTU_2497	1	1	1	2	0	2	3	2	0	3	3	1	1	1	2	1	0	0	42	7	3	1	1	0	10	5	9	0	0	1	1	0	0	0	2	0	0	0	0	0	0	0	0	0	0	d__Bacteria
OTU_2498	0	0	0	0	0	0	1	0	1	0	0	0	1	0	0	0	0	0	0	0	0	0	0	0	0	0	0	0	0	0	0	0	0	0	0	0	0	0	0	0	0	0	0	0	0	d__Bacteria; p__Chloroflexi; c__Chloroflexia; o__Kallotenuales; f__AKIW781; g__AKIW781_ge
OTU_25	596	1010	518	195	540	294	649	79	72	859	455	123	268	408	102	5	2	40	3	4	48	32	120	4	0	9	17	36	38	12	0	0	0	0	0	0	0	0	0	1	0	0	0	3	1	d__Bacteria; p__Proteobacteria; c__Alphaproteobacteria; o__Acetobacterales; f__Acetobacteraceae; g__Roseomonas
OTU_250	0	0	0	0	1	0	0	0	0	0	0	0	0	0	0	0	0	0	0	7	53	32	8	8	0	1	89	0	0	8	12	14	15	24	20	3	26	20	24	52	715	14	121	389	363	d__Bacteria; p__Bacteroidetes; c__Bacteroidia; o__Cytophagales; f__Spirosomaceae; g__Spirosoma
OTU_2500	2	4	1	1	1	2	2	0	1	19	6	0	6	2	1	0	0	4	0	0	4	0	0	2	0	0	0	1	3	2	0	0	0	0	0	0	0	0	0	0	0	0	0	0	0	d__Bacteria; p__Bacteroidetes; c__Bacteroidia; o__Cytophagales; f__Hymenobacteraceae; g__Hymenobacter
OTU_2502	0	0	0	0	0	0	0	0	0	0	0	0	0	0	0	0	2	0	1	6	2	2	2	1	5	2	2	0	0	0	0	0	0	0	0	0	0	0	0	0	0	0	0	0	0	d__Bacteria
OTU_2503	1	1	0	1	1	1	1	0	0	0	1	0	1	0	0	0	0	0	0	0	0	0	0	0	0	0	0	0	0	0	0	0	0	0	0	0	0	0	0	0	0	0	0	0	0	d__Bacteria; p__Chloroflexi; c__JG30_KF_CM66; o__JG30_KF_CM66_or; f__JG30_KF_CM66_fa; g__JG30_KF_CM66_ge
OTU_2504	0	0	1	0	0	1	1	1	1	0	0	0	0	1	0	0	0	0	0	0	0	0	0	0	0	0	0	0	0	0	0	0	0	0	0	0	0	0	0	0	0	0	0	0	0	d__Bacteria; p__Chloroflexi; c__Dehalococcoidia; o__SAR202_clade; f__SAR202_clade_fa; g__SAR202_clade_ge; s__uncultured_soil_bacterium
OTU_2505	0	1	1	0	1	2	1	1	2	1	1	0	1	1	0	0	0	1	15	4	1	3	0	0	4	2	2	0	2	1	0	1	0	0	0	0	0	0	0	3	1	1	0	0	0	d__Bacteria; p__Proteobacteria; c__Alphaproteobacteria; o__Sphingomonadales; f__Sphingomonadaceae; g__Novosphingobium
OTU_2506	0	1	1	0	0	0	1	1	1	1	0	0	0	1	0	0	0	0	0	0	0	0	0	1	0	0	0	0	0	0	0	0	0	0	0	0	0	0	0	0	0	0	0	0	0	d__Bacteria; p__Proteobacteria; c__Deltaproteobacteria; o__Myxococcales
OTU_2507	0	0	0	4	1	0	0	0	0	0	0	0	0	0	0	0	0	0	0	0	0	0	0	0	0	0	0	0	0	0	0	0	0	0	0	0	0	0	0	0	0	0	0	0	0	Unclassified
OTU_2508	0	0	0	0	0	0	0	0	0	0	0	0	0	0	0	0	0	0	0	0	1	0	0	0	0	0	0	0	0	0	0	0	0	0	0	0	3	3	3	0	14	1	0	0	0	d__Bacteria; p__Bacteroidetes; c__Bacteroidia; o__Cytophagales; f__Spirosomaceae
OTU_2509	0	0	0	3	0	0	0	0	0	0	1	0	0	2	0	0	0	0	0	0	0	0	0	0	0	0	0	0	0	0	0	0	0	0	0	0	0	0	0	0	0	0	0	0	0	Unclassified
OTU_251	33	31	30	90	22	37	82	58	93	52	26	43	52	33	68	24	38	196	133	82	46	10	3	20	31	50	20	41	23	15	15	14	0	15	145	14	12	18	4	28	20	11	7	48	17	d__Bacteria; p__Proteobacteria; c__Gammaproteobacteria; o__Betaproteobacteriales; f__Burkholderiaceae
OTU_2510	0	0	0	0	0	0	0	0	0	1	0	0	1	0	0	0	0	0	0	0	0	0	0	3	1	0	0	0	0	0	0	0	0	0	0	0	0	0	0	0	0	0	0	0	0	Unclassified
OTU_2511	2	0	2	1	1	0	0	0	1	1	1	0	0	1	3	0	0	0	2	0	0	0	0	0	0	0	0	0	0	0	0	0	0	0	0	0	0	0	0	0	0	0	0	0	0	d__Bacteria; p__Actinobacteria; c__Acidimicrobiia; o__uncultured; f__uncultured_fa; g__uncultured_ge; s__metagenome
OTU_2512	0	1	0	0	0	0	0	1	2	0	0	0	0	0	0	1	0	0	16	3	1	0	0	0	2	0	6	0	0	0	0	0	0	0	23	0	0	0	0	0	1	0	0	0	0	d__Bacteria; p__Actinobacteria; c__MB_A2_108; o__MB_A2_108_or; f__MB_A2_108_fa; g__MB_A2_108_ge; s__metagenome
OTU_2513	0	0	0	0	0	0	0	0	0	0	0	1	1	0	0	0	0	0	0	0	0	0	0	0	0	0	0	0	0	0	0	0	0	0	0	0	0	0	1	4	2	0	0	1	2	Unclassified
OTU_2515	0	0	0	0	0	0	0	0	0	0	0	0	0	0	0	0	0	0	0	0	0	0	0	0	0	0	0	0	0	0	23	2	1	2	8	0	1	1	0	0	0	4	0	0	0	d__Bacteria; p__Proteobacteria; c__Alphaproteobacteria; o__Caulobacterales; f__Caulobacteraceae; g__uncultured; s__uncultured_eubacterium_WD233
OTU_2516	0	0	0	1	0	0	0	0	0	1	1	1	0	0	0	0	1	0	0	0	0	0	0	0	0	0	0	0	0	1	2	0	0	2	1	0	0	0	0	0	3	0	0	0	0	d__Bacteria; p__Bacteroidetes; c__Bacteroidia; o__Sphingobacteriales; f__Sphingobacteriaceae
OTU_2517	0	0	0	0	0	0	0	0	1	1	0	0	0	0	0	0	0	1	0	4	0	0	0	0	0	0	0	0	0	0	2	0	0	3	0	0	8	1	0	0	3	0	0	0	0	d__Bacteria; p__Proteobacteria; c__Gammaproteobacteria; o__Legionellales; f__Legionellaceae; g__Legionella
OTU_2518	0	0	0	0	1	0	0	0	0	1	0	0	0	0	0	0	0	0	0	0	0	3	0	0	0	0	0	0	0	0	1	7	0	0	0	0	3	8	0	0	0	0	0	0	0	d__Bacteria; p__Patescibacteria; c__Saccharimonadia; o__Saccharimonadales; f__Saccharimonadales_fa; g__Saccharimonadales_ge
OTU_2519	2	0	0	0	1	1	0	2	6	1	0	0	3	0	0	0	0	0	0	0	0	0	0	0	0	1	0	0	0	0	0	0	0	0	0	0	0	0	0	0	0	0	0	0	0	d__Bacteria; p__Chloroflexi; c__Anaerolineae; o__SBR1031; f__SBR1031_fa; g__SBR1031_ge; s__uncultured_soil_bacterium
OTU_252	0	0	0	1	0	0	0	0	0	0	0	0	0	0	0	1	0	0	0	1	10	291	461	118	2	0	22	393	77	44	9	81	0	0	1	31	7	4	0	4	14	1	26	104	380	d__Bacteria; p__Bacteroidetes; c__Bacteroidia; o__Cytophagales; f__Spirosomaceae; g__Spirosoma
OTU_2522	0	0	0	0	1	0	1	0	0	0	0	0	0	0	0	0	0	0	0	0	0	0	0	9	0	0	0	0	0	0	0	0	0	0	0	0	0	0	0	0	0	0	0	0	0	Unclassified
OTU_2523	0	0	0	0	0	0	0	0	0	0	0	0	0	0	0	1	0	0	0	0	0	0	0	0	0	0	0	0	0	0	0	7	0	0	0	1	2	4	0	0	0	2	0	1	3	d__Bacteria
OTU_2524	0	0	0	0	1	0	1	0	1	1	0	1	1	0	1	0	0	0	0	0	0	0	0	0	0	0	1	0	0	0	0	0	0	0	0	0	0	0	0	2	0	0	0	0	0	d__Bacteria; p__Proteobacteria; c__Deltaproteobacteria; o__Myxococcales; f__Sandaracinaceae; g__uncultured; s__metagenome
OTU_2525	0	0	1	0	0	0	0	0	0	0	0	0	0	0	0	0	0	0	5	0	0	1	0	0	0	1	0	0	0	0	0	0	0	0	1	0	0	0	0	0	0	0	0	0	0	d__Bacteria; p__Gemmatimonadetes; c__Gemmatimonadetes; o__Gemmatimonadales; f__Gemmatimonadaceae; g__uncultured; s__metagenome
OTU_2526	0	1	0	0	1	2	0	1	1	1	1	0	3	0	0	0	0	0	0	0	0	0	0	0	0	0	0	0	0	0	0	0	0	0	0	0	0	0	0	0	0	0	0	0	0	d__Bacteria; p__Proteobacteria; c__Gammaproteobacteria; o__Xanthomonadales; f__Rhodanobacteraceae; g__Pseudofulvimonas; s__uncultured_bacterium
OTU_2527	3	1	0	0	2	1	1	1	0	0	0	1	3	0	0	0	0	0	0	0	0	0	0	0	0	0	0	0	0	0	0	0	0	0	0	0	0	0	0	0	0	0	0	0	0	d__Bacteria; p__Entotheonellaeota; c__Entotheonellia; o__Entotheonellales; f__Entotheonellaceae; g__Entotheonellaceae_ge; s__uncultured_bacterium
OTU_2528	1	1	0	0	1	1	0	0	1	1	0	0	0	0	0	0	0	0	1	0	0	0	0	0	0	0	1	0	0	0	0	0	0	0	0	0	0	0	0	0	0	0	0	0	0	d__Bacteria; p__Planctomycetes; c__Planctomycetacia; o__Gemmatales; f__Gemmataceae; g__Fimbriiglobus; s__uncultured_bacterium
OTU_2529	4	0	0	4	2	1	0	0	1	0	0	0	0	0	0	0	0	0	0	0	0	0	0	0	0	0	0	0	0	0	0	0	0	0	0	0	0	0	0	0	0	0	0	0	0	d__Bacteria; p__Firmicutes; c__Clostridia; o__Clostridiales; f__Lachnospiraceae; g__Dorea; s__uncultured_bacterium
OTU_253	6	25	0	73	87	19	3	46	21	3	5	59	2	4	3	7	0	2	0	0	0	0	0	1	0	0	5	0	0	0	0	0	0	0	0	0	0	0	0	0	0	0	0	0	0	d__Bacteria; p__Bacteroidetes; c__Bacteroidia; o__Cytophagales; f__Cytophagaceae
OTU_2530	0	0	0	0	0	0	0	0	0	0	0	0	1	0	0	0	0	0	0	0	0	0	0	0	0	0	0	0	0	0	0	1	0	0	0	0	7	3	0	4	1	0	26	0	7	d__Bacteria; p__Acidobacteria; c__Blastocatellia_Subgroup_4; o__Blastocatellales; f__Blastocatellaceae
OTU_2532	0	0	0	0	0	1	2	0	0	1	0	1	0	1	0	0	0	0	0	0	0	0	0	0	0	0	0	0	0	0	0	0	0	0	0	0	0	0	0	0	0	0	0	0	0	d__Bacteria; p__Bacteroidetes; c__Bacteroidia; o__Flavobacteriales; f__Crocinitomicaceae; g__Crocinitomix
OTU_2533	2	0	0	0	0	1	2	0	1	0	0	0	2	1	0	0	0	0	0	0	0	0	0	0	0	0	0	0	0	0	0	0	0	0	0	0	0	0	0	0	0	0	0	0	0	d__Bacteria; p__Acidobacteria; c__Blastocatellia_Subgroup_4; o__11_24; f__11_24_fa; g__11_24_ge; s__uncultured_bacterium
OTU_2534	0	0	0	0	0	0	0	0	0	2	1	0	1	0	0	0	0	0	0	0	0	0	0	0	0	0	0	0	0	0	0	0	0	0	0	0	0	0	0	0	0	0	0	0	0	d__Bacteria; p__Chloroflexi; c__Chloroflexia; o__Kallotenuales; f__AKIW781; g__AKIW781_ge
OTU_2535	0	0	0	0	0	0	0	0	0	0	0	0	0	0	0	0	0	0	0	0	0	0	0	0	0	0	0	0	0	0	0	1	0	0	0	0	1	1	2	0	14	0	0	0	0	d__Bacteria; p__Proteobacteria; c__Deltaproteobacteria; o__Myxococcales
OTU_2536	1	0	0	0	0	1	0	0	0	1	0	0	0	0	0	0	0	0	0	1	0	0	0	0	0	0	0	0	0	0	0	0	0	0	0	0	0	0	0	0	0	0	0	0	0	d__Bacteria; p__Planctomycetes; c__Planctomycetacia; o__Gemmatales; f__Gemmataceae; g__uncultured; s__planctomycete_WY69
OTU_2537	4	22	22	3	45	23	4	4	9	25	9	14	9	4	3	84	28	248	14	16	311	199	241	51	65	114	52	100	207	277	46	86	30	69	1	11	27	10	4	17	17	19	18	36	40	d__Bacteria; p__Actinobacteria; c__Actinobacteria; o__Propionibacteriales; f__Propionibacteriaceae; g__Friedmanniella; s__uncultured_bacterium
OTU_2538	0	1	0	1	0	0	0	1	4	0	0	0	1	0	0	0	0	0	1	0	0	0	0	0	1	0	2	0	0	0	0	0	0	0	0	0	0	0	0	0	0	0	0	0	0	d__Bacteria; p__Planctomycetes; c__Planctomycetacia; o__Pirellulales; f__Pirellulaceae
OTU_2539	0	0	0	0	0	0	0	0	0	0	0	0	0	0	0	0	0	0	0	0	0	0	0	0	0	0	0	0	0	0	0	1	1	0	0	0	10	3	0	9	22	1	0	0	0	d__Bacteria; p__Proteobacteria; c__Deltaproteobacteria; o__Bdellovibrionales; f__Bdellovibrionaceae; g__Bdellovibrio
OTU_2540	0	0	0	2	0	0	0	0	0	1	0	0	2	1	1	0	0	0	0	0	0	0	0	0	0	0	0	0	0	0	0	0	0	0	0	0	0	0	0	0	0	0	0	0	0	Unclassified
OTU_2541	0	0	1	0	0	1	1	1	1	1	0	0	0	0	0	0	0	0	0	0	0	0	0	0	0	0	0	0	0	0	0	0	0	0	0	0	0	0	0	0	0	0	0	0	0	d__Bacteria; p__Chloroflexi; c__KD4_96; o__KD4_96_or; f__KD4_96_fa; g__KD4_96_ge
OTU_2543	0	1	0	0	0	1	1	0	1	0	0	0	2	1	0	0	0	0	4	0	0	0	0	0	0	0	0	0	0	0	0	0	0	0	0	0	0	0	0	0	0	0	0	0	0	d__Bacteria; p__Proteobacteria; c__Gammaproteobacteria; o__Steroidobacterales; f__Steroidobacteraceae; g__uncultured; s__metagenome
OTU_2544	1	0	0	0	0	0	1	0	0	0	1	1	0	0	1	1	0	0	0	0	0	0	0	0	0	0	0	0	0	0	0	0	0	0	0	0	0	0	0	0	0	0	0	0	0	d__Bacteria; p__Proteobacteria; c__Deltaproteobacteria; o__Myxococcales; f__Nannocystaceae; g__Nannocystis; s__Nannocystis_sp.
OTU_2545	7	24	13	10	12	8	24	10	27	21	4	1	10	5	3	0	0	0	1	0	0	0	0	0	0	0	0	0	0	0	0	0	0	0	0	0	0	0	0	0	0	0	0	0	0	d__Bacteria; p__Gemmatimonadetes; c__Gemmatimonadetes; o__Gemmatimonadales; f__Gemmatimonadaceae; g__uncultured
OTU_2546	0	1	0	0	0	0	0	2	3	1	1	0	0	0	0	0	0	0	0	0	0	0	0	0	0	0	0	0	0	0	0	0	0	0	0	0	0	0	0	0	0	0	0	0	0	d__Bacteria; p__Elusimicrobia; c__Elusimicrobia; o__MVP_88; f__MVP_88_fa; g__MVP_88_ge; s__uncultured_bacterium
OTU_2547	0	0	0	0	0	0	0	1	0	1	0	0	1	1	0	0	0	0	0	0	0	0	0	0	0	0	0	0	0	0	0	0	0	0	0	0	0	0	0	0	0	0	0	0	0	d__Bacteria; p__Proteobacteria; c__Alphaproteobacteria; o__Rhodospirillales; f__Magnetospiraceae; g__uncultured; s__metagenome
OTU_2548	23	25	17	4	11	4	18	12	21	10	16	6	12	4	2	0	0	0	16	3	5	2	2	0	1	2	5	0	0	1	0	0	0	1	3	0	1	0	0	0	0	0	0	0	0	d__Bacteria; p__Proteobacteria; c__Alphaproteobacteria; o__Sphingomonadales; f__Sphingomonadaceae; g__Sphingomonas
OTU_2549	0	0	0	0	0	0	1	1	2	1	0	1	0	0	0	0	0	0	2	0	0	0	0	0	0	0	1	0	0	0	0	0	0	0	0	0	0	0	0	0	0	0	0	0	0	d__Bacteria; p__Verrucomicrobia; c__Verrucomicrobiae; o__Opitutales; f__Opitutaceae; g__IMCC26134
OTU_255	12	10	5	1	5	2	5	7	13	8	5	3	3	2	4	1	0	0	5	2	1	0	0	0	0	0	986	0	1	0	0	1	0	0	1	0	0	0	0	0	0	1	0	0	0	d__Bacteria; p__Actinobacteria; c__Actinobacteria; o__Streptomycetales; f__Streptomycetaceae; g__Streptomyces; s__Streptomyces_lavendulae_subsp._lavendulae
OTU_2550	0	0	0	0	0	0	0	0	0	0	0	0	0	0	0	0	0	0	0	0	0	0	0	0	0	0	0	0	0	0	0	0	0	0	0	0	0	0	1	0	0	0	0	3	6	d__Bacteria
OTU_2551	1	0	0	0	1	0	0	1	2	1	0	0	0	0	0	0	0	0	0	0	0	0	0	0	0	0	0	0	0	0	0	0	0	0	0	0	0	0	0	0	0	0	0	0	0	d__Bacteria; p__Actinobacteria; c__0319_7L14; o__0319_7L14_or; f__0319_7L14_fa; g__0319_7L14_ge; s__uncultured_actinobacterium
OTU_2552	0	0	0	0	1	0	0	0	0	2	2	1	1	0	0	0	0	0	2	0	1	0	0	0	2	1	0	0	0	0	0	0	0	0	0	0	0	0	0	0	0	0	0	0	0	d__Bacteria; p__Actinobacteria; c__Actinobacteria; o__Streptosporangiales; f__Streptosporangiaceae; g__Nonomuraea; s__metagenome
OTU_2553	0	1	0	3	1	0	2	3	0	0	3	0	1	0	0	0	0	0	0	0	0	0	0	0	0	0	0	0	0	0	1	1	0	0	0	1	0	0	0	0	3	0	0	0	0	d__Bacteria; p__Proteobacteria; c__Alphaproteobacteria; o__Sphingomonadales; f__Sphingomonadaceae
OTU_2554	3	7	3	1	4	3	8	10	11	3	2	5	7	0	2	0	0	0	9	0	0	0	0	0	0	0	1	0	0	0	1	0	0	0	0	0	0	0	0	1	0	0	0	0	1	d__Bacteria; p__Actinobacteria; c__Thermoleophilia; o__Solirubrobacterales; f__67_14; g__67_14_ge; s__uncultured_actinobacterium
OTU_2555	0	2	2	1	0	3	1	1	1	1	1	1	0	0	1	0	0	0	1	0	0	0	0	0	0	0	0	0	0	0	0	0	0	0	2	0	0	0	0	0	0	0	0	0	0	d__Bacteria; p__Chloroflexi; c__Chloroflexia; o__Chloroflexales; f__Roseiflexaceae; g__uncultured; s__uncultured_bacterium
OTU_2556	0	0	0	0	0	0	1	0	0	0	0	0	0	0	0	0	0	0	0	0	0	0	0	0	1	1	1	0	0	0	0	0	0	0	0	0	0	0	1	0	0	0	0	1	2	d__Bacteria; p__Proteobacteria; c__Gammaproteobacteria; o__Diplorickettsiales; f__Diplorickettsiaceae; g__uncultured
OTU_2557	0	1	2	1	0	0	1	2	1	5	1	3	2	0	2	0	0	0	10	1	1	0	0	0	1	0	1	0	1	0	0	0	0	0	1	0	0	0	0	0	0	1	0	0	0	d__Bacteria; p__Proteobacteria; c__Gammaproteobacteria; o__Betaproteobacteriales; f__A21b; g__A21b_ge; s__uncultured_beta_proteobacterium
OTU_2558	1	2	0	1	1	1	3	1	3	2	0	1	2	0	0	0	0	0	0	1	0	0	0	0	0	0	0	0	0	0	0	0	0	0	0	0	0	0	0	0	1	0	0	0	0	d__Bacteria; p__Actinobacteria; c__Thermoleophilia; o__Solirubrobacterales; f__67_14; g__67_14_ge; s__uncultured_bacterium
OTU_2559	0	0	1	1	0	0	0	1	4	3	1	0	1	2	0	0	0	0	2	0	0	0	0	0	1	0	1	0	0	0	0	0	0	0	0	0	0	0	0	0	0	0	0	0	0	d__Bacteria; p__Verrucomicrobia; c__Verrucomicrobiae; o__Chthoniobacterales; f__Chthoniobacteraceae; g__Chthoniobacter; s__uncultured_bacterium
OTU_2560	2	1	0	0	1	0	0	0	5	2	1	0	1	0	0	0	0	0	0	0	0	0	0	0	1	0	0	0	0	0	0	0	0	0	0	0	0	0	0	0	0	0	0	0	0	d__Bacteria; p__Proteobacteria; c__Deltaproteobacteria; o__Myxococcales; f__Sandaracinaceae; g__uncultured
OTU_2561	3	0	5	1	5	0	0	13	1	0	0	0	1	0	0	0	0	0	0	0	0	0	0	0	0	0	0	0	0	0	0	0	0	0	0	0	0	0	0	0	0	0	0	0	0	d__Bacteria; p__Bacteroidetes; c__Bacteroidia; o__Bacteroidales; f__Bacteroidaceae; g__Bacteroides; s__Bacteroides_ovatus
OTU_2562	0	0	1	0	0	0	0	1	2	2	2	0	0	0	0	0	0	0	0	0	0	0	0	0	0	0	0	0	0	0	0	0	0	0	0	0	0	0	0	0	0	0	0	0	0	d__Bacteria; p__Proteobacteria; c__Deltaproteobacteria; o__Oligoflexales; f__0319_6G20; g__0319_6G20_ge
OTU_2563	0	2	0	0	1	0	1	1	1	1	0	0	1	0	0	0	0	0	3	1	0	0	0	1	0	0	1	0	0	0	0	0	0	0	0	0	0	1	0	0	0	0	0	0	0	d__Bacteria; p__Planctomycetes; c__Planctomycetacia; o__Gemmatales; f__Gemmataceae; g__Gemmata
OTU_2564	1	0	0	1	0	0	0	0	0	0	0	0	0	0	0	0	0	0	0	0	2	0	0	0	0	0	0	0	0	0	0	0	0	0	0	0	0	0	0	0	0	0	0	0	0	d__Bacteria; p__Proteobacteria; c__Deltaproteobacteria; o__Myxococcales; f__Phaselicystidaceae; g__Phaselicystis
OTU_2565	0	0	1	0	0	2	0	2	1	3	0	0	1	0	1	0	0	0	0	2	0	2	0	0	0	0	1	0	0	0	0	0	0	0	0	0	0	0	0	0	0	0	0	0	0	d__Bacteria; p__Entotheonellaeota; c__Entotheonellia; o__Entotheonellales; f__Entotheonellaceae; g__Candidatus_Entotheonella
OTU_2566	1	1	1	0	1	1	2	2	3	1	0	0	0	0	1	0	0	0	0	0	0	0	0	0	0	0	0	0	0	0	0	0	0	0	0	0	0	0	0	0	0	0	0	0	0	d__Bacteria; p__Proteobacteria; c__Alphaproteobacteria
OTU_2567	0	0	0	0	0	0	0	1	2	2	0	0	1	0	0	0	0	0	0	0	0	0	0	0	0	0	0	0	0	0	0	0	0	0	0	0	0	0	0	0	0	0	0	0	0	d__Bacteria; p__Planctomycetes; c__Phycisphaerae; o__Tepidisphaerales; f__WD2101_soil_group; g__WD2101_soil_group_ge
OTU_2568	0	0	0	0	0	1	2	0	1	0	0	0	0	0	0	1	0	0	5	0	0	0	0	0	0	0	1	0	0	0	0	0	0	0	1	0	0	0	0	0	0	0	0	0	0	d__Bacteria; p__Actinobacteria; c__Acidimicrobiia; o__Actinomarinales; f__uncultured; g__uncultured_ge
OTU_257	17	30	24	19	18	30	64	38	96	68	22	32	61	26	29	1	0	0	77	4	0	3	0	0	1	3	8	0	0	1	0	0	0	0	4	0	0	1	0	1	1	0	0	1	0	d__Bacteria; p__Proteobacteria; c__Gammaproteobacteria; o__Betaproteobacteriales; f__Nitrosomonadaceae; g__Ellin6067
OTU_2570	0	0	1	0	0	0	1	0	0	0	0	0	0	0	1	0	0	0	0	0	0	0	0	0	0	0	0	0	0	0	0	0	0	0	0	0	0	0	0	0	1	0	0	0	0	d__Bacteria; p__Rokubacteria; c__NC10; o__Rokubacteriales; f__Rokubacteriales_fa; g__Rokubacteriales_ge
OTU_2571	0	0	0	0	0	0	2	0	2	0	0	0	0	0	0	0	0	0	0	0	0	0	0	0	0	0	0	0	0	0	0	0	0	0	0	0	0	0	0	0	0	0	0	0	0	d__Bacteria; p__Actinobacteria; c__MB_A2_108; o__MB_A2_108_or; f__MB_A2_108_fa; g__MB_A2_108_ge
OTU_2572	1	1	0	0	1	0	0	1	1	0	1	0	0	0	0	0	0	0	0	0	0	0	0	0	0	0	0	0	0	0	0	0	0	0	0	0	0	0	0	0	0	0	0	0	0	d__Bacteria; p__Planctomycetes; c__Phycisphaerae; o__Tepidisphaerales; f__WD2101_soil_group; g__WD2101_soil_group_ge
OTU_2573	0	0	0	0	0	0	1	0	0	0	2	0	0	0	0	0	8	3	3	0	8	21	0	2	0	0	0	0	0	3	0	0	0	0	0	0	2	0	0	0	0	0	0	0	0	d__Bacteria; p__Bacteroidetes; c__Bacteroidia; o__Cytophagales; f__Hymenobacteraceae; g__Hymenobacter; s__Hymenobacter_sp._DK6_66
OTU_2574	0	0	0	1	0	0	1	0	0	1	0	3	0	1	0	0	0	1	0	0	0	0	0	0	0	0	0	0	0	1	2	11	4	0	9	7	0	0	0	0	1	0	4	2	10	d__Bacteria; p__Proteobacteria; c__Alphaproteobacteria; o__Caedibacterales; f__Caedibacteraceae; g__Caedibacter
OTU_2575	1	2	0	1	0	0	4	1	1	3	0	2	1	1	0	0	0	0	0	0	0	0	0	0	0	0	0	0	0	0	0	0	0	0	0	0	0	0	0	0	0	0	0	0	0	d__Bacteria; p__Proteobacteria; c__Gammaproteobacteria; o__Xanthomonadales; f__Rhodanobacteraceae; g__Luteibacter
OTU_2576	1	2	0	2	0	1	1	2	4	1	0	0	3	0	0	0	0	0	2	0	0	0	0	0	3	0	0	0	0	0	0	0	0	0	0	0	0	0	0	0	0	0	0	0	0	d__Bacteria; p__Chloroflexi; c__Dehalococcoidia; o__S085; f__S085_fa; g__S085_ge; s__metagenome
OTU_2577	0	1	0	0	0	0	0	0	1	1	1	0	0	1	2	0	0	0	0	0	0	0	0	0	0	0	0	0	0	0	0	0	0	0	0	0	0	0	0	0	0	0	0	0	0	d__Bacteria; p__Chloroflexi; c__Ktedonobacteria; o__C0119; f__C0119_fa; g__C0119_ge
OTU_2578	0	0	0	0	0	0	2	0	2	0	0	0	0	1	0	0	0	0	0	0	1	0	0	0	0	0	0	0	0	0	0	0	0	0	0	0	0	0	0	0	0	0	0	0	0	d__Bacteria; p__Chloroflexi; c__Chloroflexia; o__Chloroflexales; f__Roseiflexaceae; g__uncultured
OTU_2579	0	0	0	0	1	0	1	0	0	2	0	0	0	0	1	0	0	0	0	0	0	0	0	0	0	0	0	0	0	0	0	0	0	1	0	0	0	0	0	0	0	0	0	0	0	d__Bacteria; p__Proteobacteria; c__Deltaproteobacteria; o__Myxococcales; f__Polyangiaceae; g__Sorangium; s__metagenome
OTU_258	15	24	43	14	13	22	36	31	70	60	25	10	42	12	12	0	0	0	64	10	4	2	0	0	4	7	24	0	0	0	0	0	0	0	0	0	1	0	0	0	0	0	0	0	0	d__Bacteria; p__Acidobacteria; c__Subgroup_6; o__Subgroup_6_or; f__Subgroup_6_fa; g__Subgroup_6_ge
OTU_2580	1	0	2	2	3	5	5	1	7	8	5	3	6	1	0	1	0	0	8	2	0	0	0	0	0	1	2	0	0	0	0	0	0	0	1	0	0	0	0	0	0	0	0	0	0	d__Bacteria; p__Acidobacteria; c__Subgroup_6; o__Subgroup_6_or; f__Subgroup_6_fa; g__Subgroup_6_ge
OTU_2581	1	0	1	1	0	1	3	2	3	0	1	1	2	1	2	0	0	0	0	0	0	0	0	0	0	0	0	0	0	0	0	0	0	0	0	0	0	0	0	0	0	0	0	0	0	d__Bacteria; p__Bacteroidetes; c__Bacteroidia; o__Flavobacteriales
OTU_2582	0	0	0	0	0	0	0	0	0	0	0	0	0	0	0	0	0	0	0	0	0	0	0	0	0	0	0	0	0	0	0	0	0	0	0	0	1	1	0	0	0	0	2	3	7	d__Bacteria
OTU_2583	0	0	1	0	0	1	0	1	1	0	0	1	0	0	1	0	0	0	0	0	0	0	0	0	0	0	1	0	0	0	0	0	0	0	0	0	0	0	0	0	0	0	0	0	0	d__Bacteria; p__Bacteroidetes; c__Bacteroidia
OTU_2584	2	0	0	0	0	1	0	1	12	0	0	2	0	0	0	0	0	0	0	0	0	0	1	1	0	0	0	0	0	0	2	1	0	0	0	0	1	0	0	0	1	0	0	0	0	d__Bacteria; p__Proteobacteria; c__Alphaproteobacteria; o__Caulobacterales; f__Caulobacteraceae; g__Brevundimonas
OTU_2585	1	1	0	0	1	0	0	2	1	1	1	2	0	0	1	0	0	0	2	2	1	0	0	0	0	1	0	0	0	0	0	0	0	0	0	0	0	0	0	0	0	0	0	0	0	d__Bacteria; p__Gemmatimonadetes; c__Gemmatimonadetes; o__Gemmatimonadales; f__Gemmatimonadaceae; g__Gemmatimonas
OTU_2586	0	0	1	0	0	0	0	0	0	0	0	0	0	0	1	0	0	0	0	1	1	0	0	0	0	1	1	0	0	0	0	0	0	0	0	0	0	3	0	0	21	0	0	0	0	d__Bacteria; p__Firmicutes; c__Bacilli; o__Lactobacillales; f__Carnobacteriaceae; g__Carnobacterium
OTU_2587	0	0	1	0	0	0	0	0	0	0	1	0	0	0	0	0	0	0	11	0	1	0	0	0	0	0	2	0	0	0	0	0	0	1	0	0	0	0	0	0	0	0	0	0	0	d__Bacteria; p__Actinobacteria; c__MB_A2_108; o__MB_A2_108_or; f__MB_A2_108_fa; g__MB_A2_108_ge
OTU_2588	1	0	1	0	2	1	1	0	0	1	0	1	0	3	3	1	1	0	0	0	1	0	0	0	1	1	0	0	207	0	0	0	0	1	2	10	3	1	1	2	0	11	1	0	3	d__Bacteria; p__Proteobacteria; c__Gammaproteobacteria; o__Enterobacteriales; f__Enterobacteriaceae
OTU_2589	1	1	0	0	2	1	0	3	3	5	1	2	3	0	0	0	0	0	0	0	0	0	0	0	0	0	0	0	0	0	0	0	0	0	0	0	0	0	0	0	0	0	0	0	0	d__Bacteria; p__Bacteroidetes; c__Bacteroidia; o__Cytophagales; f__Hymenobacteraceae; g__Adhaeribacter
OTU_259	49	41	13	1	1	0	19	0	4	20	14	0	1	16	2	8	0	0	5	16	40	14	59	22	73	11	45	34	1	7	0	0	0	0	0	0	0	0	0	0	0	0	0	0	0	d__Bacteria
OTU_2590	0	0	1	0	0	1	3	1	0	0	1	0	0	1	0	0	0	0	3	0	0	0	0	0	0	0	0	0	0	0	0	0	0	0	0	0	0	0	0	0	0	0	0	0	0	d__Bacteria; p__Gemmatimonadetes; c__Gemmatimonadetes; o__Gemmatimonadales; f__Gemmatimonadaceae
OTU_2591	0	1	0	0	1	1	1	0	2	1	0	0	0	0	0	0	0	0	0	0	0	0	0	0	0	0	0	0	0	0	0	0	0	0	0	0	0	0	0	0	0	0	0	0	0	d__Bacteria; p__Proteobacteria; c__Deltaproteobacteria; o__Myxococcales
OTU_2592	0	0	0	0	0	0	0	0	0	0	0	0	0	0	0	0	0	0	0	0	0	0	0	0	0	0	0	0	0	0	0	0	0	2	0	15	0	0	0	1	0	0	0	0	0	Unclassified
OTU_2593	0	0	0	1	0	0	1	1	1	0	0	0	1	0	0	0	0	0	2	1	1	0	0	0	0	2	1	0	0	0	0	0	0	0	0	0	0	0	0	0	0	0	0	0	0	d__Bacteria; p__Proteobacteria; c__Deltaproteobacteria; o__Myxococcales; f__BIrii41; g__BIrii41_ge; s__uncultured_bacterium
OTU_2594	1	0	0	0	2	0	0	0	0	2	0	0	0	0	0	2	0	3	0	0	1	0	1	0	0	0	0	6	4	6	0	0	1	1	0	1	1	0	0	0	0	0	0	0	2	d__Bacteria; p__Actinobacteria; c__Actinobacteria; o__Kineosporiales; f__Kineosporiaceae; g__Angustibacter; s__uncultured_bacterium
OTU_2595	0	0	0	0	0	0	0	1	0	1	3	0	0	0	0	0	0	0	0	0	0	0	0	0	0	0	0	0	0	0	0	0	0	0	0	0	0	0	0	0	0	0	0	0	0	Unclassified
OTU_2596	0	1	0	1	0	1	0	0	3	0	0	0	0	0	0	0	0	0	0	0	0	0	0	0	0	0	0	0	0	0	0	0	0	0	0	0	0	0	0	0	0	0	0	0	0	d__Bacteria; p__Planctomycetes; c__Phycisphaerae; o__Phycisphaerales; f__Phycisphaeraceae; g__SM1A02; s__uncultured_planctomycete
OTU_2597	0	0	0	0	0	0	0	0	0	0	0	0	0	0	0	0	0	0	0	0	0	1	0	0	0	0	0	0	0	0	3	2	2	1	0	0	0	0	1	1	0	7	0	0	0	d__Bacteria
OTU_2598	0	0	0	2	2	0	1	0	3	1	0	1	0	1	0	0	0	0	0	0	0	0	0	0	0	0	0	0	0	0	0	0	0	0	0	0	0	0	0	0	0	0	0	0	0	d__Bacteria; p__Proteobacteria; c__Deltaproteobacteria; o__RCP2_54; f__RCP2_54_fa; g__RCP2_54_ge
OTU_2599	0	0	0	0	0	0	0	0	0	0	0	0	0	0	0	0	0	0	0	0	0	0	0	0	0	0	0	0	0	0	2	1	0	0	0	0	0	0	0	0	0	1	0	0	0	Unclassified
OTU_26	1	13	8	53	63	57	6	9	364	6	3	77	78	47	5443	4	1	0	3	14	0	10	6	1	3	17	1	0	0	0	2	1	0	5	5	4	8	8	0	46	1	1	0	2	0	d__Bacteria; p__Firmicutes; c__Bacilli; o__Bacillales; f__Bacillaceae; g__Bacillus
OTU_260	79	10	7	18	19	6	4	1	1	13	20	9	3	6	3	0	0	0	0	0	9	1	2	0	1	2	3	0	2	0	0	0	0	0	0	0	0	0	0	0	0	0	0	0	0	d__Bacteria; p__Deinococcus_Thermus; c__Deinococci; o__Deinococcales; f__Deinococcaceae; g__Deinococcus; s__Deinococcus_swuensis
OTU_2600	0	0	0	0	0	0	0	0	2	0	0	0	0	0	0	0	0	0	0	0	0	0	0	0	0	0	0	0	0	0	0	0	0	0	0	0	1	1	0	0	0	0	0	9	0	d__Bacteria; p__Bacteroidetes; c__Bacteroidia; o__Cytophagales; f__Amoebophilaceae; g__Candidatus_Amoebophilus
OTU_2602	0	2	0	0	2	0	1	1	0	1	0	1	0	0	1	0	0	0	0	0	0	0	0	0	0	0	0	0	0	0	0	0	0	0	0	0	0	1	0	0	0	0	0	0	0	d__Bacteria; p__Chloroflexi; c__Chloroflexia; o__Kallotenuales; f__AKIW781; g__AKIW781_ge; s__uncultured_bacterium
OTU_2603	0	0	0	0	0	0	0	0	0	0	0	0	0	0	0	0	0	1	0	0	0	0	0	0	0	0	0	0	0	0	0	0	0	0	0	0	0	0	0	6	1	0	24	0	0	d__Bacteria; p__Proteobacteria; c__Deltaproteobacteria
OTU_2604	2	1	1	0	0	0	0	1	2	1	0	0	0	0	0	0	0	0	0	0	0	0	0	0	0	0	0	0	0	0	0	0	0	0	2	0	0	0	0	0	0	0	0	0	0	d__Bacteria; p__Chloroflexi; c__Chloroflexia; o__Chloroflexales; f__Roseiflexaceae; g__uncultured; s__uncultured_bacterium
OTU_2605	0	0	0	0	0	0	1	2	1	1	1	0	0	0	0	0	0	0	0	0	0	0	0	0	0	0	1	0	0	0	0	0	0	0	0	0	0	0	0	0	0	0	0	0	0	d__Bacteria; p__Acidobacteria; c__Thermoanaerobaculia; o__Thermoanaerobaculales; f__Thermoanaerobaculaceae; g__Subgroup_10
OTU_2606	0	0	0	0	0	1	0	0	0	0	0	1	0	1	0	0	0	0	0	0	0	0	0	0	0	0	0	0	0	0	0	0	0	0	0	0	0	0	0	0	0	0	0	0	0	d__Bacteria
OTU_2607	0	1	2	0	0	1	0	1	0	1	0	0	1	1	0	0	0	0	3	0	0	0	0	0	0	0	0	0	0	0	0	0	0	0	0	0	0	0	0	0	0	0	0	0	0	d__Bacteria; p__Planctomycetes
OTU_2608	0	0	0	0	0	0	0	0	0	0	0	0	0	0	0	0	0	0	0	0	0	0	0	0	0	0	0	0	0	0	2	0	0	0	0	0	5	1	7	0	5	0	1	0	1	d__Bacteria; p__Verrucomicrobia; c__Verrucomicrobiae; o__Chthoniobacterales; f__Chthoniobacteraceae; g__Chthoniobacter
OTU_2609	0	2	1	0	1	0	1	2	3	1	1	0	2	0	1	0	0	5	3	0	2	0	0	0	0	0	0	0	0	0	0	0	0	0	0	0	0	0	0	0	0	0	1	0	1	d__Bacteria; p__Proteobacteria; c__Deltaproteobacteria; o__Myxococcales; f__Haliangiaceae; g__Haliangium
OTU_261	17	14	17	14	10	9	40	34	44	26	15	14	17	11	13	1	0	0	30	1	5	0	1	1	3	3	1	0	0	0	0	0	0	0	1	0	1	0	0	0	0	1	2	0	1	d__Bacteria; p__Proteobacteria; c__Alphaproteobacteria; o__Rhizobiales; f__Xanthobacteraceae; g__uncultured
OTU_2610	1	0	1	0	1	1	1	0	1	0	0	1	1	0	0	0	0	0	0	0	0	0	0	0	0	0	0	0	0	0	0	0	0	0	0	0	0	0	0	0	0	0	0	0	0	d__Bacteria; p__Chloroflexi; c__Anaerolineae; o__Anaerolineales; f__Anaerolineaceae; g__uncultured
OTU_2611	0	0	0	0	0	0	0	0	0	0	0	0	0	0	0	0	0	0	0	0	0	0	0	0	0	0	0	0	0	0	0	0	0	0	0	0	8	0	1	1	4	0	0	0	0	d__Bacteria; p__Bacteroidetes; c__Bacteroidia; o__Chitinophagales; f__Chitinophagaceae
OTU_2612	0	1	0	1	0	1	2	0	1	0	0	0	0	0	0	0	0	0	3	0	0	0	0	0	0	0	0	0	0	0	0	0	0	0	0	0	0	0	0	1	0	0	0	0	0	d__Bacteria
OTU_2613	1	3	1	1	5	3	0	5	6	8	1	2	7	1	1	0	0	0	3	2	1	1	2	0	3	4	6	0	0	0	0	0	0	1	1	0	0	0	0	0	0	0	3	0	0	d__Bacteria; p__Acidobacteria; c__Blastocatellia_Subgroup_4; o__Blastocatellales; f__Blastocatellaceae; g__JGI_0001001_H03
OTU_2614	0	1	1	0	0	0	1	0	0	1	1	0	0	0	0	0	0	0	0	0	0	0	0	0	0	0	0	0	0	0	0	0	0	0	0	0	0	0	0	0	0	0	0	0	0	d__Bacteria; p__Planctomycetes; c__BD7_11; o__BD7_11_or; f__BD7_11_fa; g__BD7_11_ge
OTU_2615	0	0	0	0	0	0	0	0	0	0	0	0	0	0	0	0	0	0	0	0	0	0	0	0	0	0	0	0	0	0	1	0	0	2	0	14	2	1	0	5	1	1	0	0	0	Unclassified
OTU_2616	0	0	1	1	0	1	2	0	0	1	0	0	0	0	1	0	0	0	3	0	0	0	0	0	0	0	0	0	0	0	0	0	0	0	0	0	0	0	0	0	1	0	0	0	0	d__Bacteria; p__Bacteroidetes; c__Bacteroidia; o__Flavobacteriales; f__NS9_marine_group; g__NS9_marine_group_ge; s__metagenome
OTU_2617	0	0	0	2	1	1	1	0	1	0	1	0	1	0	0	0	0	0	0	0	0	0	0	0	0	0	0	0	0	0	0	0	0	0	0	0	0	0	1	0	0	0	0	4	0	d__Bacteria; p__Proteobacteria; c__Deltaproteobacteria; o__Oligoflexales; f__0319_6G20; g__0319_6G20_ge
OTU_2618	0	1	0	0	1	0	0	0	3	1	0	0	0	0	0	0	0	0	0	0	0	0	0	0	0	0	0	0	0	0	0	0	0	0	0	0	0	0	0	0	0	0	0	0	0	d__Bacteria; p__Armatimonadetes; c__uncultured; o__uncultured_or; f__uncultured_fa; g__uncultured_ge
OTU_2619	0	1	1	0	0	1	1	1	1	0	1	0	0	0	0	0	0	0	3	0	0	0	0	0	0	0	0	0	0	0	0	0	0	0	0	0	0	0	0	0	0	0	0	0	0	d__Bacteria; p__Planctomycetes; c__Planctomycetacia; o__Pirellulales; f__Pirellulaceae; g__uncultured
OTU_262	0	1	0	1	133	7	0	0	0	0	1	0	0	0	0	0	0	0	0	0	0	0	0	0	0	0	0	0	0	0	0	0	0	0	0	0	0	0	0	2	0	0	0	2	0	d__Bacteria; p__Dependentiae; c__Babeliae; o__Babeliales; f__Vermiphilaceae; g__Vermiphilaceae_ge
OTU_2620	0	0	0	5	0	0	0	0	0	0	0	0	0	1	0	1	0	0	0	0	1	0	0	0	1	0	0	0	0	0	0	0	0	0	0	0	0	0	1	2	0	0	0	0	0	d__Bacteria; p__Proteobacteria; c__Deltaproteobacteria
OTU_2621	1	9	10	1	3	1	1	1	0	0	0	1	1	3	1	2	0	0	0	1	0	0	0	3	0	0	0	1	0	0	0	0	0	0	1	0	1	2	0	0	0	0	0	1	0	d__Bacteria; p__Actinobacteria; c__Actinobacteria; o__Corynebacteriales; f__Corynebacteriaceae; g__Corynebacterium_1
OTU_2622	0	0	0	0	1	0	0	1	1	1	0	0	0	0	0	0	0	0	0	0	0	0	0	0	0	0	0	0	0	0	0	0	0	0	0	0	0	0	0	0	0	0	0	0	0	d__Bacteria; p__Proteobacteria; c__Alphaproteobacteria; o__Caulobacterales; f__Caulobacteraceae; g__PMMR1
OTU_2623	0	0	0	0	0	0	0	0	0	2	0	0	0	0	1	0	0	0	0	0	0	0	0	0	0	0	0	0	0	0	0	0	0	0	0	0	0	0	0	0	0	0	0	0	0	d__Bacteria; p__Omnitrophicaeota; c__Omnitrophicaeota_cl; o__Omnitrophicaeota_or; f__Omnitrophicaeota_fa; g__Omnitrophicaeota_ge
OTU_2624	0	0	0	0	0	0	0	0	0	0	0	0	0	0	0	1	2	0	0	0	0	0	0	0	0	0	0	0	0	0	0	0	0	0	0	0	2	0	0	0	0	1	0	0	3	d__Bacteria; p__Proteobacteria; c__Gammaproteobacteria; o__Gammaproteobacteria_Incertae_Sedis; f__Unknown_Family
OTU_2625	2	1	0	0	0	1	0	0	1	3	0	0	3	1	0	1	0	0	0	0	0	1	0	0	0	0	0	0	0	0	0	0	0	0	0	0	0	0	0	0	0	0	0	0	0	d__Bacteria; p__Proteobacteria; c__Alphaproteobacteria; o__Rhizobiales; f__Rhizobiales_Incertae_Sedis; g__uncultured
OTU_2626	0	0	0	0	2	2	1	1	2	2	1	2	0	1	0	0	0	0	0	0	0	0	0	0	0	0	0	0	0	0	0	0	0	0	0	0	0	0	0	0	0	0	0	0	0	d__Bacteria; p__Chloroflexi; c__Anaerolineae; o__SBR1031; f__A4b; g__A4b_ge
OTU_2627	0	0	0	0	0	0	0	0	0	1	0	0	2	1	0	1	0	0	0	0	0	1	0	0	0	0	0	0	0	0	0	0	0	0	0	0	0	0	0	0	0	0	0	1	0	d__Bacteria; p__Proteobacteria; c__Deltaproteobacteria; o__Bdellovibrionales; f__Bdellovibrionaceae; g__Bdellovibrio
OTU_2629	0	1	0	0	2	0	1	2	2	1	1	0	4	0	0	0	0	0	4	1	0	0	0	0	0	0	1	0	0	0	0	1	0	0	0	0	0	0	0	0	0	0	0	1	0	d__Bacteria; p__Actinobacteria; c__Actinobacteria; o__Micromonosporales; f__Micromonosporaceae
OTU_263	18	24	20	62	94	46	107	25	12	92	95	12	75	66	27	44	11	71	11	121	151	298	141	76	111	20	66	57	34	90	16	20	7	44	4	25	27	17	45	63	157	158	16	26	27	d__Bacteria; p__Proteobacteria; c__Alphaproteobacteria; o__Sphingomonadales; f__Sphingomonadaceae; g__Sphingomonas
OTU_2630	0	0	0	0	4	0	1	2	1	1	0	2	1	0	1	0	0	2	0	0	0	0	0	0	0	0	0	0	0	0	7	8	2	1	0	6	1	1	0	1	4	3	0	1	5	d__Bacteria; p__Proteobacteria; c__Deltaproteobacteria; o__Bdellovibrionales; f__Bdellovibrionaceae; g__Bdellovibrio; s__uncultured_Bdellovibrio_sp.
OTU_2631	0	0	0	0	0	0	0	3	0	1	0	1	0	0	0	0	0	0	0	0	0	0	0	0	0	0	0	0	0	0	0	0	0	0	0	0	0	0	0	0	0	0	0	0	0	d__Bacteria; p__Chloroflexi; c__Chloroflexia; o__Kallotenuales; f__AKIW781; g__AKIW781_ge
OTU_2633	0	1	0	0	0	1	2	1	1	0	1	0	0	0	0	0	0	0	0	0	0	0	0	0	0	0	0	0	0	0	0	0	0	0	0	0	0	0	0	0	0	0	0	0	0	d__Bacteria; p__Planctomycetes; c__Planctomycetacia; o__Pirellulales; f__Pirellulaceae; g__Pirellula
OTU_2634	0	0	0	0	0	0	3	0	0	0	0	0	0	1	2	0	0	0	1	0	0	0	0	0	0	0	0	0	0	0	0	0	0	0	0	0	0	0	0	0	0	0	0	0	0	d__Bacteria; p__Planctomycetes; c__Phycisphaerae; o__Phycisphaerales; f__Phycisphaeraceae; g__SM1A02; s__metagenome
OTU_2635	1	0	0	0	1	1	0	0	3	0	0	0	0	0	0	0	0	0	6	0	0	0	0	0	0	0	1	0	1	0	0	0	0	0	1	0	0	0	0	2	0	0	0	0	0	d__Bacteria; p__Proteobacteria; c__Deltaproteobacteria; o__Myxococcales; f__Haliangiaceae; g__Haliangium; s__uncultured_Myxococcales_bacterium
OTU_2636	0	0	1	0	0	1	2	0	2	0	0	0	0	0	0	0	0	0	0	0	0	0	0	0	0	0	0	0	0	0	0	0	0	0	0	0	0	0	0	0	0	0	0	0	0	d__Bacteria; p__Chloroflexi; c__Chloroflexia; o__Chloroflexales; f__Roseiflexaceae; g__uncultured; s__uncultured_bacterium
OTU_2637	1	1	0	1	0	0	1	3	2	0	0	0	0	1	0	0	0	0	0	0	0	0	0	0	0	0	0	0	0	0	0	0	0	0	0	0	0	0	0	0	0	0	0	0	0	d__Bacteria; p__Actinobacteria; c__Acidimicrobiia
OTU_2638	1	1	0	0	1	0	2	1	3	0	0	0	2	1	0	0	0	0	2	1	0	0	0	0	1	0	0	0	0	0	0	0	0	0	0	0	1	0	0	0	0	0	0	0	0	d__Bacteria; p__Planctomycetes; c__Phycisphaerae; o__Tepidisphaerales; f__WD2101_soil_group; g__WD2101_soil_group_ge
OTU_2639	0	1	1	0	0	0	0	0	0	0	0	0	0	1	0	0	0	0	1	0	1	0	0	0	0	0	0	0	0	0	0	0	0	0	0	0	0	0	0	0	0	0	0	0	0	d__Bacteria; p__Proteobacteria; c__Deltaproteobacteria; o__Myxococcales; f__Haliangiaceae; g__Haliangium
OTU_2640	0	0	0	0	0	0	0	0	0	0	0	0	0	0	0	3	0	2	0	1	4	4	1	0	0	0	2	0	0	0	23	25	53	17	38	4	33	111	13	25	61	136	16	23	12	d__Bacteria; p__Planctomycetes; c__Planctomycetacia; o__Isosphaerales; f__Isosphaeraceae; g__Singulisphaera
OTU_2641	0	0	0	0	0	0	2	0	0	0	0	0	0	0	0	0	0	0	4	2	0	0	0	0	1	2	0	0	0	0	0	0	0	0	0	0	0	0	0	0	0	0	0	0	0	d__Bacteria; p__Proteobacteria; c__Alphaproteobacteria; o__Rhodospirillales; f__Rhodopirillaceae; g__Defluviicoccus
OTU_2642	0	0	0	0	0	0	0	0	0	0	0	0	1	0	0	0	0	0	0	2	0	0	0	2	0	0	0	0	0	0	0	0	0	0	5	0	2	0	0	0	0	1	0	12	2	d__Bacteria
OTU_2644	0	1	0	0	0	0	0	0	0	0	0	0	0	0	0	0	0	0	5	0	0	0	0	0	0	0	0	0	1	0	0	3	0	1	0	0	2	2	1	0	1	0	0	0	2	d__Bacteria; p__Bacteroidetes; c__Bacteroidia; o__Chitinophagales; f__Chitinophagaceae; g__Parafilimonas; s__uncultured_Chitinophagaceae_bacterium
OTU_2645	1	0	0	3	0	1	0	0	0	0	0	0	1	0	2	0	0	0	0	0	0	0	0	0	0	0	0	0	0	0	0	0	0	0	0	0	0	0	0	0	0	0	0	0	0	d__Bacteria; p__Proteobacteria; c__Alphaproteobacteria; o__Micavibrionales; f__uncultured; g__uncultured_ge; s__metagenome
OTU_2646	0	0	1	0	0	0	1	3	1	0	0	2	0	0	0	0	0	0	0	0	0	0	0	0	0	0	0	0	0	0	0	0	0	0	0	0	0	0	0	0	0	0	0	0	0	d__Bacteria; p__Proteobacteria; c__Alphaproteobacteria; o__Rhizobiales
OTU_2647	0	1	1	0	2	0	1	1	0	0	0	0	0	0	0	0	0	0	0	0	0	0	0	0	0	0	0	0	0	0	0	0	0	0	0	0	0	0	0	0	0	0	0	0	0	d__Bacteria; p__Actinobacteria; c__Actinobacteria; o__Propionibacteriales; f__Nocardioidaceae
OTU_2648	0	0	2	0	0	0	1	1	0	0	0	1	0	0	0	0	0	0	0	1	0	0	0	0	1	0	0	0	0	0	0	0	0	0	0	0	0	0	0	0	0	0	0	0	0	d__Bacteria; p__Bacteroidetes; c__Ignavibacteria; o__OPB56; f__OPB56_fa; g__OPB56_ge
OTU_2649	0	2	3	0	1	0	2	1	2	1	1	1	1	1	1	0	0	0	0	0	0	0	0	0	0	0	0	0	0	0	0	0	0	0	0	0	0	0	0	0	0	0	0	0	0	d__Bacteria; p__Bacteroidetes; c__Bacteroidia; o__Chitinophagales; f__37_13; g__37_13_ge
OTU_265	30	4	13	35	5	7	11	13	3	5	0	14	0	1	10	0	0	0	0	3	0	7	6	3	1	0	8	0	1	0	0	0	0	0	0	0	0	0	0	0	0	0	0	0	0	d__Bacteria; p__Deinococcus_Thermus; c__Deinococci; o__Deinococcales; f__Deinococcaceae; g__Deinococcus
OTU_2650	0	0	0	1	0	1	0	1	0	0	0	3	0	0	0	0	0	0	0	0	0	0	0	0	0	0	0	0	0	0	1	0	1	2	0	0	1	1	2	0	0	0	1	0	4	d__Bacteria; p__Patescibacteria; c__Saccharimonadia; o__Saccharimonadales; f__Saccharimonadales_fa; g__Saccharimonadales_ge
OTU_2652	0	0	0	0	0	0	0	0	2	0	0	0	3	0	0	0	0	0	0	0	0	0	0	0	0	1	0	0	0	0	0	0	0	0	13	0	0	0	0	0	0	0	0	0	0	d__Bacteria; p__Proteobacteria; c__Gammaproteobacteria; o__Xanthomonadales; f__Xanthomonadaceae
OTU_2653	0	0	3	0	0	1	3	2	0	2	1	2	1	0	1	0	0	0	1	1	0	0	0	0	0	0	0	0	0	0	0	0	0	0	0	0	0	0	0	0	1	0	0	0	0	d__Bacteria; p__Actinobacteria; c__Acidimicrobiia; o__Microtrichales; f__Ilumatobacteraceae; g__uncultured; s__metagenome
OTU_2654	0	1	0	0	0	0	0	0	2	1	0	0	0	0	0	0	0	0	2	0	1	0	0	0	0	0	0	0	0	0	0	0	0	0	0	0	0	0	0	0	0	0	0	2	0	d__Bacteria; p__Bacteroidetes; c__Bacteroidia; o__Cytophagales; f__Microscillaceae
OTU_2655	0	0	0	0	0	0	0	0	0	0	1	0	0	0	0	2	1	0	1	4	0	0	0	0	0	7	0	0	0	0	0	1	0	2	1	0	1	0	0	4	0	1	0	0	0	d__Bacteria; p__Bacteroidetes; c__Bacteroidia; o__Sphingobacteriales; f__KD3_93; g__KD3_93_ge; s__metagenome
OTU_2656	0	0	0	0	1	0	0	0	2	1	0	0	0	0	0	0	0	0	0	0	0	0	0	0	0	0	0	0	0	0	0	0	0	0	0	0	0	0	0	0	0	0	0	0	0	d__Bacteria; p__Planctomycetes; c__Planctomycetacia; o__Gemmatales; f__Gemmataceae; g__uncultured
OTU_2657	1	0	0	1	0	0	0	0	1	0	0	0	0	2	0	0	0	0	0	0	0	0	0	0	0	0	0	0	0	0	0	0	0	0	0	0	0	0	0	0	0	0	0	0	0	d__Bacteria; p__Planctomycetes; c__vadinHA49; o__vadinHA49_or; f__vadinHA49_fa; g__vadinHA49_ge; s__uncultured_planctomycete
OTU_2658	0	0	0	0	0	0	0	0	0	0	0	0	0	0	0	0	0	2	0	11	0	0	0	2	1	2	2	0	0	0	0	0	0	0	0	0	0	0	0	0	0	0	0	0	0	d__Bacteria
OTU_2659	0	0	1	0	0	0	0	0	0	0	1	0	0	0	0	0	1	14	0	0	11	0	0	0	0	0	0	0	9	2	2	3	1	6	26	0	1	1	1	0	0	3	0	0	0	d__Bacteria; p__Proteobacteria; c__Alphaproteobacteria; o__Caedibacterales; f__Caedibacteraceae; g__Caedibacter; s__uncultured_Caedibacter_sp.
OTU_266	23	11	2	26	35	9	10	42	11	19	29	13	13	4	0	0	0	0	2	0	0	0	0	0	1	0	1	0	0	0	0	0	0	1	0	0	0	5	0	0	0	0	1	0	1	d__Bacteria; p__Proteobacteria; c__Alphaproteobacteria; o__Tistrellales; f__Geminicoccaceae; g__Geminicoccus; s__uncultured_alpha_proteobacterium
OTU_2660	1	0	0	0	0	0	0	0	2	0	0	0	0	0	0	0	0	0	1	1	0	0	0	0	0	0	0	0	0	0	0	0	0	0	0	0	1	0	0	0	1	0	0	0	0	d__Bacteria; p__Verrucomicrobia; c__Verrucomicrobiae; o__Pedosphaerales; f__Pedosphaeraceae; g__Pedosphaeraceae_ge; s__metagenome
OTU_2661	0	1	0	0	1	0	3	2	2	0	3	0	4	1	1	0	0	0	8	0	1	0	0	0	0	1	1	0	0	0	0	0	0	0	0	0	0	0	0	0	0	0	0	0	1	d__Bacteria; p__Proteobacteria; c__Alphaproteobacteria; o__Rhizobiales; f__Rhodomicrobiaceae; g__Rhodomicrobium
OTU_2662	0	1	0	0	1	0	1	0	3	1	0	0	0	0	0	0	0	0	0	0	0	0	0	0	0	0	0	0	0	0	0	0	0	0	0	0	0	0	0	0	0	0	0	0	0	d__Bacteria; p__Gemmatimonadetes; c__S0134_terrestrial_group; o__S0134_terrestrial_group_or; f__S0134_terrestrial_group_fa; g__S0134_terrestrial_group_ge; s__uncultured_Gemmatimonadetes_bacterium
OTU_2664	1	0	1	0	2	0	0	0	2	2	1	0	1	0	0	0	0	0	3	2	0	0	0	0	1	0	0	0	0	0	0	0	0	0	0	0	0	0	0	0	0	0	0	0	0	d__Bacteria
OTU_2665	0	0	0	0	0	0	0	1	1	1	0	0	0	0	0	0	0	0	0	0	0	0	0	0	0	0	0	0	0	0	0	0	0	0	0	0	0	0	0	0	0	0	0	0	0	d__Bacteria; p__Proteobacteria; c__Alphaproteobacteria; o__Acetobacterales; f__Acetobacteraceae
OTU_2666	0	0	0	0	0	0	0	0	0	4	0	0	0	0	0	0	0	0	0	0	0	0	0	0	0	0	0	0	0	0	0	0	0	0	0	0	0	0	0	0	0	0	0	0	0	Unclassified
OTU_2667	1	0	0	0	0	0	1	0	2	1	0	1	0	0	1	0	0	0	0	1	0	0	0	0	1	0	0	0	0	0	0	0	0	0	0	0	0	0	0	0	0	0	0	0	0	d__Bacteria; p__Bacteroidetes; c__Bacteroidia; o__Flavobacteriales; f__NS9_marine_group; g__NS9_marine_group_ge
OTU_2668	0	0	0	1	0	0	1	3	0	0	0	1	0	0	0	0	0	0	0	0	0	0	0	0	0	0	0	0	0	0	0	0	0	0	0	0	0	0	0	0	0	0	0	0	0	d__Bacteria; p__Proteobacteria; c__Deltaproteobacteria; o__Bdellovibrionales; f__Bdellovibrionaceae; g__OM27_clade
OTU_2669	0	1	0	0	1	0	2	1	0	0	1	0	0	1	1	0	0	0	3	0	0	0	0	0	1	0	0	0	0	0	0	0	0	0	0	0	0	0	0	0	0	0	0	0	0	d__Bacteria; p__Chloroflexi; c__Chloroflexia; o__Thermomicrobiales; f__JG30_KF_CM45; g__JG30_KF_CM45_ge; s__uncultured_Chloroflexi_bacterium
OTU_2670	3	1	1	0	1	0	0	0	1	0	0	1	0	0	0	0	0	0	0	0	0	0	0	0	0	0	0	0	0	0	0	0	0	0	0	0	0	0	0	0	0	0	0	0	0	d__Bacteria; p__Proteobacteria; c__Alphaproteobacteria; o__Rhizobiales
OTU_2671	0	1	0	0	1	0	0	0	1	2	1	0	1	2	0	0	0	0	0	0	0	0	0	0	0	0	0	0	0	0	0	0	0	0	0	0	0	0	0	0	0	0	0	0	0	d__Bacteria
OTU_2672	0	0	0	0	0	0	0	0	0	0	0	0	0	0	0	0	0	0	0	0	0	0	0	0	0	0	0	0	0	0	0	0	0	0	0	0	2	1	0	1	4	1	4	7	2	d__Bacteria; p__Chloroflexi
OTU_2674	3	3	1	1	6	1	7	17	7	6	2	3	6	2	5	1	0	0	8	0	0	0	0	0	1	0	0	0	0	0	0	0	0	0	0	0	0	0	0	0	0	0	0	0	0	d__Bacteria; p__Actinobacteria; c__Thermoleophilia; o__Solirubrobacterales
OTU_2675	0	0	3	0	0	2	1	0	0	0	0	0	0	0	0	0	0	0	8	1	1	0	0	0	0	0	1	0	0	0	0	0	0	0	2	0	0	0	0	0	0	1	0	0	0	d__Bacteria; p__Proteobacteria; c__Deltaproteobacteria; o__Desulfarculales; f__Desulfarculaceae; g__uncultured
OTU_2676	0	2	2	0	0	0	0	0	2	2	0	1	1	1	0	1	0	0	21	3	0	1	0	3	5	0	9	0	0	0	0	0	0	2	1	0	0	0	0	0	0	1	0	0	0	d__Bacteria; p__Planctomycetes; c__Planctomycetacia; o__Pirellulales; f__Pirellulaceae; g__Pir4_lineage
OTU_2678	0	0	0	1	0	0	1	1	2	0	0	0	0	0	0	0	0	0	0	0	0	0	0	0	0	0	0	0	0	0	0	0	0	0	0	0	0	0	0	0	0	0	0	0	0	d__Bacteria
OTU_2679	0	0	0	0	0	0	0	0	0	0	0	0	0	0	0	0	0	0	0	0	0	0	0	0	0	0	0	0	0	0	0	0	0	0	0	0	11	6	1	0	0	0	0	0	0	d__Bacteria; p__Planctomycetes; c__Planctomycetacia; o__Gemmatales; f__Gemmataceae; g__uncultured; s__uncultured_bacterium
OTU_268	0	0	0	0	0	0	0	0	0	1	0	0	0	0	0	0	0	0	0	0	48	0	0	0	0	711	0	0	0	0	0	0	0	0	0	0	1	0	0	0	0	0	0	0	0	d__Bacteria; p__Proteobacteria; c__Gammaproteobacteria; o__Enterobacteriales; f__Enterobacteriaceae; g__Buchnera
OTU_2680	0	0	0	0	0	0	0	0	0	2	0	0	1	0	0	0	0	0	1	0	2	0	0	0	0	1	3	0	0	0	0	0	0	0	0	0	0	0	0	0	0	0	0	0	0	d__Bacteria; p__Acidobacteria; c__Blastocatellia_Subgroup_4; o__DS_100; f__DS_100_fa; g__DS_100_ge
OTU_2681	58	54	18	22	28	18	15	6	11	68	51	14	45	43	34	0	0	1	0	0	5	0	0	0	1	0	0	0	0	0	0	0	0	0	0	1	0	0	0	0	0	0	0	0	0	d__Bacteria; p__Proteobacteria; c__Alphaproteobacteria; o__Acetobacterales; f__Acetobacteraceae; g__Roseomonas; s__Roseomonas_sp._M3
OTU_2682	1	1	0	1	0	0	0	0	2	2	1	4	0	0	4	0	0	0	0	0	0	0	0	0	0	0	0	0	0	0	0	0	0	0	0	0	0	0	0	0	0	0	0	0	0	d__Bacteria; p__Actinobacteria; c__Actinobacteria; o__Streptosporangiales; f__Thermomonosporaceae; g__Actinomadura
OTU_2683	0	0	0	1	0	0	0	0	0	3	0	0	2	0	0	0	0	0	26	0	2	0	0	0	0	2	0	0	0	0	2	0	0	1	0	0	0	0	0	2	0	0	0	0	0	d__Bacteria; p__Actinobacteria; c__Thermoleophilia; o__Solirubrobacterales; f__67_14; g__67_14_ge
OTU_2684	2	1	0	1	0	0	2	1	1	1	1	0	1	0	0	0	0	0	1	0	0	0	0	0	0	0	0	0	0	0	0	0	0	0	0	0	1	0	0	0	0	0	0	0	1	d__Bacteria; p__Bacteroidetes; c__Bacteroidia; o__Chitinophagales; f__Chitinophagaceae; g__uncultured
OTU_2685	0	0	0	0	1	0	2	1	1	0	0	3	0	1	1	0	0	0	2	0	0	0	0	1	0	0	0	0	0	0	0	0	0	0	0	0	0	2	0	0	0	1	0	0	0	d__Bacteria; p__Chloroflexi; c__Chloroflexia; o__Thermomicrobiales; f__JG30_KF_CM45; g__JG30_KF_CM45_ge
OTU_2686	0	0	0	0	0	0	0	0	0	2	0	0	1	0	0	0	0	0	0	0	0	0	0	0	0	0	0	0	0	0	0	0	0	0	0	0	0	0	0	0	0	0	0	0	0	d__Bacteria; p__Planctomycetes; c__Planctomycetacia; o__Gemmatales; f__Gemmataceae; g__uncultured
OTU_2687	0	0	1	0	0	1	0	0	0	0	0	0	1	0	1	0	0	0	0	0	0	0	0	0	0	0	0	0	0	0	0	0	0	0	0	0	0	0	0	0	0	0	0	0	0	d__Bacteria; p__Armatimonadetes; c__uncultured; o__uncultured_or; f__uncultured_fa; g__uncultured_ge
OTU_2688	0	0	0	0	0	0	0	0	0	1	0	1	0	0	0	0	0	0	2	1	0	0	0	0	1	0	0	0	0	0	0	0	0	0	0	0	0	0	0	1	0	0	0	0	0	d__Bacteria; p__Bacteroidetes; c__Ignavibacteria; o__OPB56; f__OPB56_fa; g__OPB56_ge; s__uncultured_soil_bacterium
OTU_2689	0	0	0	0	0	1	0	1	0	1	2	0	0	1	1	0	0	0	0	0	0	0	0	0	0	0	0	0	0	0	0	0	0	0	0	0	0	0	0	0	0	0	0	0	0	d__Bacteria; p__Proteobacteria; c__Alphaproteobacteria; o__Acetobacterales; f__Acetobacteraceae; g__Craurococcus; s__uncultured_bacterium
OTU_2690	0	0	0	0	0	0	0	0	0	0	0	0	0	0	0	0	0	0	0	0	0	5	4	0	0	0	0	0	0	0	5	5	1	0	0	0	0	1	1	0	0	2	0	1	1	d__Bacteria
OTU_2691	0	2	0	1	0	0	3	3	1	1	1	1	3	0	1	0	0	0	2	0	0	0	0	0	0	0	0	0	0	0	1	0	0	0	0	0	0	0	0	0	0	0	0	0	0	d__Bacteria; p__Actinobacteria; c__Acidimicrobiia; o__Microtrichales; f__uncultured; g__uncultured_ge; s__uncultured_bacterium
OTU_2692	0	0	0	0	0	1	2	0	3	0	0	1	1	0	0	0	0	0	1	0	0	0	0	0	0	0	1	0	0	0	0	0	0	0	0	0	1	0	0	0	0	0	0	0	0	d__Bacteria; p__Planctomycetes; c__Planctomycetacia; o__Gemmatales; f__Gemmataceae
OTU_2693	1	0	0	1	0	1	1	4	2	3	1	2	1	0	5	0	0	0	11	4	4	0	0	1	6	2	4	0	3	1	0	0	0	0	1	0	0	2	0	0	1	0	0	0	0	d__Bacteria; p__Actinobacteria; c__Actinobacteria; o__Propionibacteriales; f__Nocardioidaceae; g__Nocardioides
OTU_2695	0	0	0	0	0	0	0	0	1	2	0	0	0	0	1	0	0	0	0	0	0	0	0	0	0	0	0	0	0	0	0	0	0	0	0	0	0	0	0	0	0	0	0	0	0	d__Bacteria
OTU_2696	0	0	0	0	0	1	0	0	0	0	0	0	0	0	0	0	0	0	0	0	0	0	0	0	0	0	0	0	0	0	0	0	0	0	0	0	0	0	2	0	0	0	0	11	0	d__Bacteria
OTU_2697	0	0	0	1	0	0	0	0	0	0	2	0	0	1	0	0	0	0	0	0	0	0	0	0	0	0	0	0	0	0	0	0	0	0	0	0	0	0	0	0	0	0	0	0	0	d__Bacteria; p__Proteobacteria; c__Deltaproteobacteria
OTU_2698	0	0	0	0	0	0	0	0	0	0	0	0	0	0	0	0	0	0	0	0	0	0	0	0	0	0	0	0	0	0	0	0	0	2	2	13	3	2	0	1	7	2	1	2	1	Unclassified
OTU_2700	0	1	0	0	0	0	0	0	3	0	0	0	0	0	0	0	0	0	0	0	0	0	0	0	0	0	0	0	0	0	0	0	0	0	0	0	0	0	0	0	0	0	0	0	0	d__Bacteria; p__Firmicutes; c__Clostridia; o__Clostridiales; f__Lachnospiraceae
OTU_2701	0	3	0	0	0	0	0	0	0	0	0	0	0	0	0	0	0	0	0	0	0	0	0	0	0	0	0	0	0	0	0	0	0	0	0	0	0	0	0	0	0	0	0	0	0	d__Bacteria; p__Firmicutes; c__Erysipelotrichia; o__Erysipelotrichales; f__Erysipelotrichaceae; g__Dubosiella; s__Dubosiella_newyorkensis
OTU_2702	0	0	5	0	0	1	0	0	5	0	0	0	0	0	0	0	0	0	0	0	0	0	0	0	0	0	0	0	0	0	0	0	0	0	0	0	0	0	0	0	0	0	0	0	0	d__Bacteria; p__Bacteroidetes; c__Bacteroidia; o__Bacteroidales; f__Prolixibacteraceae
OTU_2703	5	0	1	1	9	2	6	3	3	2	1	6	1	1	1	0	0	0	5	1	4	3	0	0	2	2	0	0	0	1	0	0	0	2	4	0	0	0	0	2	0	0	0	0	0	d__Bacteria; p__Proteobacteria; c__Alphaproteobacteria; o__Azospirillales; f__Azospirillaceae; g__Skermanella; s__uncultured_Azospirillum_sp.
OTU_2704	14	27	22	30	62	10	13	7	3	45	37	19	12	11	2	2	37	6	7	3	20	52	10	6	1	3	6	15	23	19	2	5	0	0	0	0	0	0	0	0	33	1	4	4	1	d__Bacteria; p__Bacteroidetes; c__Bacteroidia; o__Cytophagales; f__Hymenobacteraceae; g__Hymenobacter
OTU_2705	0	1	0	0	0	0	5	1	0	0	0	0	0	0	0	0	0	0	0	0	0	0	0	0	0	0	0	0	0	0	0	0	0	0	0	0	0	0	0	0	0	0	0	0	0	Unclassified
OTU_2706	0	0	4	0	0	0	1	0	0	0	0	0	0	0	0	0	0	0	0	0	0	0	0	0	0	0	0	0	0	0	0	0	0	0	0	0	0	0	0	0	0	0	0	0	0	d__Bacteria; p__Gemmatimonadetes; c__Gemmatimonadetes; o__Gemmatimonadales; f__Gemmatimonadaceae
OTU_2707	0	0	0	1	0	0	2	1	5	1	2	0	2	0	0	1	0	0	15	7	2	0	0	0	2	1	9	0	0	0	0	0	0	0	3	0	0	0	0	0	0	0	0	0	0	d__Bacteria; p__Acidobacteria; c__Subgroup_6; o__Subgroup_6_or; f__Subgroup_6_fa; g__Subgroup_6_ge
OTU_2708	3	0	0	1	3	0	2	1	1	2	0	1	0	0	0	0	0	0	0	0	0	0	0	0	0	0	0	0	0	0	0	0	0	0	0	0	0	0	0	0	0	0	0	0	0	d__Bacteria; p__Proteobacteria; c__Alphaproteobacteria; o__Azospirillales; f__Azospirillaceae; g__Desertibacter; s__uncultured_proteobacterium
OTU_2709	0	1	0	1	0	0	2	0	2	1	2	0	3	0	0	0	0	0	0	0	0	0	0	0	0	0	0	0	0	0	0	0	0	0	0	0	0	0	0	0	0	0	0	0	0	d__Bacteria; p__Proteobacteria; c__Deltaproteobacteria; o__MBNT15; f__MBNT15_fa; g__MBNT15_ge; s__uncultured_Myxococcales_bacterium
OTU_271	6	12	2	16	6	4	4	67	6	26	21	33	3	4	4	0	0	0	3	1	0	0	0	0	9	0	1	0	0	0	0	0	0	0	0	0	0	0	0	0	0	0	0	0	0	d__Bacteria; p__Bacteroidetes; c__Bacteroidia; o__Chitinophagales; f__Chitinophagaceae; g__Flavisolibacter; s__uncultured_bacterium
OTU_2710	0	0	0	0	0	0	0	0	0	0	0	0	0	0	0	0	0	0	0	0	0	0	0	0	0	0	0	0	0	0	0	0	0	0	8	0	0	0	0	0	0	0	0	0	0	d__Bacteria; p__Chloroflexi; c__Anaerolineae; o__Anaerolineales; f__Anaerolineaceae; g__uncultured
OTU_2711	6	14	1	47	36	29	3	82	14	31	46	20	9	21	0	0	0	2	0	2	14	1	1	0	0	0	6	0	16	0	0	0	0	0	0	0	0	0	0	0	0	0	0	0	0	d__Bacteria; p__Bacteroidetes; c__Bacteroidia; o__Chitinophagales; f__Chitinophagaceae; g__Segetibacter
OTU_2713	0	1	0	0	0	1	0	0	1	1	0	0	0	0	0	0	0	0	0	0	0	0	0	0	0	0	0	0	0	0	0	0	0	0	0	0	0	0	0	0	0	0	0	0	0	d__Bacteria; p__Proteobacteria; c__Deltaproteobacteria; o__Myxococcales; f__Haliangiaceae; g__Haliangium; s__uncultured_bacterium
OTU_2715	0	0	0	0	0	0	0	0	0	0	1	0	0	0	0	1	0	0	0	1	0	0	0	1	2	2	0	0	0	0	0	0	0	0	0	0	7	0	0	0	1	0	0	0	0	d__Bacteria; p__Firmicutes; c__Bacilli; o__Lactobacillales; f__Streptococcaceae; g__Streptococcus
OTU_2716	0	1	2	0	0	0	1	0	2	0	2	0	0	1	1	0	0	0	0	0	0	0	0	0	0	0	0	0	0	0	0	0	0	0	0	0	0	0	0	0	0	0	0	0	0	d__Bacteria; p__Chloroflexi
OTU_2717	0	0	1	0	0	0	0	0	1	2	0	0	0	1	0	0	0	0	0	0	0	0	0	0	0	0	0	0	0	0	0	0	0	0	0	0	0	0	0	0	0	0	0	0	0	d__Bacteria; p__Chloroflexi; c__Ktedonobacteria; o__C0119; f__C0119_fa; g__C0119_ge; s__uncultured_soil_bacterium
OTU_2718	1	1	4	1	1	1	1	2	4	1	1	0	1	0	1	0	0	0	0	0	0	0	0	0	0	0	0	0	0	0	0	0	0	0	3	0	0	0	0	0	0	0	0	0	0	d__Bacteria; p__Verrucomicrobia; c__Verrucomicrobiae; o__Pedosphaerales; f__Pedosphaeraceae; g__Pedosphaeraceae_ge
OTU_2719	2	0	0	0	0	0	2	1	3	1	1	1	0	0	1	0	0	0	0	0	0	0	0	0	0	0	0	0	0	0	0	0	0	0	0	0	0	0	0	0	0	0	0	0	0	d__Bacteria; p__Chloroflexi; c__Chloroflexia; o__Kallotenuales; f__AKIW781; g__AKIW781_ge
OTU_2720	0	0	0	1	0	1	0	2	0	0	0	0	0	0	0	0	0	0	0	0	0	0	0	0	0	0	0	0	0	0	0	0	0	0	0	0	0	0	0	0	0	0	0	0	0	d__Bacteria
OTU_2721	0	0	2	0	0	0	1	0	1	1	0	0	2	0	1	0	0	0	1	0	0	0	0	0	0	0	0	0	0	0	0	0	0	0	0	0	0	0	0	0	0	0	0	0	0	d__Bacteria; p__Chloroflexi; c__Chloroflexia; o__Kallotenuales; f__AKIW781; g__AKIW781_ge
OTU_2722	0	0	0	1	0	2	0	0	1	2	0	3	1	0	1	0	0	0	3	0	0	0	0	1	1	0	0	0	0	0	0	0	0	0	0	0	0	0	0	0	1	0	0	0	0	d__Bacteria; p__Actinobacteria; c__Acidimicrobiia; o__Microtrichales; f__uncultured; g__uncultured_ge; s__metagenome
OTU_2723	0	0	0	0	0	0	0	0	0	0	0	0	0	0	0	21	1	0	0	0	0	0	1	0	0	0	0	0	0	0	30	57	55	11	1	8	9	4	4	9	26	8	8	5	23	d__Bacteria; p__Proteobacteria; c__Alphaproteobacteria; o__Rhizobiales; f__Beijerinckiaceae; g__1174_901_12; s__uncultured_bacterium
OTU_2724	0	0	1	0	0	0	0	1	0	0	0	1	1	0	0	0	0	0	0	0	0	0	0	0	0	0	0	0	0	0	0	0	0	0	0	0	0	0	0	0	0	0	0	0	0	d__Bacteria; p__Chloroflexi; c__Anaerolineae; o__Ardenticatenales; f__Ardenticatenaceae; g__uncultured; s__uncultured_bacterium
OTU_2725	0	0	0	0	0	0	0	0	0	0	0	0	0	0	2	0	0	1	0	1	2	0	0	0	1	0	2	0	0	0	0	0	0	0	0	1	0	0	3	16	0	0	0	1	1	d__Bacteria; p__Proteobacteria; c__Deltaproteobacteria; o__Bdellovibrionales; f__Bacteriovoracaceae; g__Peredibacter
OTU_2726	0	0	1	0	0	1	0	0	1	1	1	0	0	1	0	0	0	0	0	0	0	0	0	0	0	0	0	0	0	0	0	0	0	0	0	0	0	0	0	0	0	0	0	0	0	d__Bacteria; p__Bacteroidetes; c__Bacteroidia; o__Sphingobacteriales; f__env.OPS_17; g__env.OPS_17_ge; s__uncultured_bacterium
OTU_2727	0	0	0	0	1	0	0	0	0	1	1	0	0	0	0	0	0	0	0	0	0	0	0	0	0	0	0	0	0	0	0	0	0	0	0	0	0	0	0	0	0	0	0	0	0	d__Bacteria; p__Gemmatimonadetes; c__Gemmatimonadetes; o__Gemmatimonadales; f__Gemmatimonadaceae; g__uncultured
OTU_2728	0	1	0	0	1	0	0	0	1	1	0	0	1	0	0	0	0	0	0	0	0	0	0	0	0	0	0	0	0	0	0	0	0	0	1	0	0	2	0	0	0	0	0	0	0	d__Bacteria; p__Chlamydiae; c__Chlamydiae; o__Chlamydiales; f__Parachlamydiaceae; g__Candidatus_Protochlamydia; s__metagenome
OTU_2729	0	0	0	0	0	0	0	0	0	0	0	0	0	0	0	0	0	0	0	0	0	0	0	0	0	0	0	0	0	0	2	18	1	0	0	0	0	1	0	0	0	0	2	0	0	d__Bacteria
OTU_2731	0	0	4	0	0	4	5	0	1	1	1	0	0	0	0	0	0	0	7	0	1	0	0	0	1	0	1	0	0	0	0	0	0	0	1	0	0	0	0	0	0	0	0	0	0	d__Bacteria; p__Proteobacteria; c__Gammaproteobacteria; o__Betaproteobacteriales; f__Nitrosomonadaceae; g__MND1; s__metagenome
OTU_2732	0	1	0	0	0	1	0	0	0	1	0	0	0	1	0	0	0	0	0	0	0	0	0	0	0	0	0	0	0	0	0	0	0	0	1	0	0	0	0	0	0	0	0	0	0	d__Bacteria; p__Firmicutes; c__Bacilli; o__Bacillales; f__Paenibacillaceae; g__Paenibacillus
OTU_2733	1	0	0	0	1	0	0	1	4	1	0	2	0	0	0	0	0	0	2	0	0	0	0	0	1	1	0	0	0	0	0	0	0	0	0	0	0	0	0	0	0	0	0	0	0	d__Bacteria; p__Chloroflexi; c__Anaerolineae; o__Caldilineales; f__Caldilineaceae; g__uncultured
OTU_2734	0	0	0	0	0	0	0	1	0	0	0	0	0	0	0	0	0	0	0	0	0	0	0	0	0	0	0	0	0	0	1	1	0	0	0	0	8	0	1	1	25	0	5	0	1	d__Bacteria; p__Planctomycetes; c__Planctomycetacia; o__Isosphaerales; f__Isosphaeraceae
OTU_2736	0	1	0	0	0	0	0	0	0	0	0	0	0	0	0	0	2	0	0	5	0	0	0	15	3	4	2	0	0	0	0	0	0	0	0	0	0	0	0	0	0	0	0	0	0	d__Bacteria
OTU_2737	0	0	0	2	1	1	1	3	0	3	2	2	2	0	1	0	0	0	1	0	1	0	0	0	0	0	0	0	0	0	0	0	0	0	0	0	0	0	0	0	0	0	0	0	0	d__Bacteria; p__Proteobacteria; c__Gammaproteobacteria; o__Betaproteobacteriales; f__Nitrosomonadaceae; g__Nitrosomonas
OTU_2739	1	1	0	2	0	0	1	0	0	0	0	0	0	0	0	0	0	5	0	1	1	0	0	0	0	0	3	0	0	0	0	1	0	0	0	0	0	0	0	5	1	0	3	1	2	d__Bacteria; p__Actinobacteria; c__Thermoleophilia; o__Solirubrobacterales; f__Solirubrobacteraceae; g__uncultured; s__Colobanthus_quitensis
OTU_274	89	101	198	65	92	298	874	14	24	302	123	23	53	75	247	78	54	67	27	367	84	326	456	107	86	55	21	116	24	232	119	142	65	11	3	11	26	47	40	90	15	15	6	11	99	d__Bacteria; p__Bacteroidetes; c__Bacteroidia; o__Cytophagales; f__Hymenobacteraceae; g__Hymenobacter; s__Siccationidurans_metalli
OTU_2741	2	1	0	1	0	0	0	2	2	0	1	1	0	0	0	0	0	0	0	0	0	0	0	0	0	0	0	0	0	0	0	0	0	0	0	0	0	0	0	0	0	0	0	0	0	d__Bacteria; p__Proteobacteria; c__Gammaproteobacteria; o__Cellvibrionales; f__Cellvibrionaceae; g__uncultured
OTU_2742	0	0	0	0	0	0	0	0	0	0	0	0	1	0	0	0	0	0	0	1	0	0	0	0	1	0	0	0	0	0	0	0	0	0	0	0	1	0	0	0	0	0	0	0	1	d__Bacteria; p__Acidobacteria; c__Acidobacteriia; o__Solibacterales; f__Solibacteraceae_Subgroup_3; g__Bryobacter
OTU_2743	0	0	0	0	1	1	0	0	0	0	0	0	0	0	0	0	0	0	0	0	0	0	0	0	2	0	0	0	0	0	0	0	0	0	0	0	0	0	0	0	0	0	0	0	0	d__Bacteria; p__Deinococcus_Thermus; c__Deinococci; o__Deinococcales; f__Deinococcaceae; g__Deinococcus
OTU_2744	14	15	7	7	13	10	16	7	6	16	13	2	26	12	8	10	7	24	20	2	14	7	6	7	1	1	6	17	8	14	11	6	0	5	1	2	1	8	0	2	4	3	1	2	3	d__Bacteria; p__Proteobacteria; c__Alphaproteobacteria; o__Sphingomonadales; f__Sphingomonadaceae; g__Sphingomonas
OTU_2745	2	1	2	1	2	0	1	4	5	0	0	1	2	1	3	0	0	0	7	0	0	0	0	1	1	3	0	0	0	0	1	0	0	0	0	0	0	0	0	0	0	0	0	0	0	d__Bacteria; p__Proteobacteria; c__Gammaproteobacteria; o__Betaproteobacteriales; f__SC_I_84; g__SC_I_84_ge
OTU_2747	0	0	0	0	1	0	0	1	1	1	0	1	2	0	0	0	0	0	0	0	0	0	0	0	1	0	0	0	0	0	0	0	0	0	0	0	0	0	0	0	0	0	0	0	0	d__Bacteria; p__Bacteroidetes; c__Bacteroidia; o__Sphingobacteriales; f__env.OPS_17; g__env.OPS_17_ge
OTU_2748	1	2	0	0	0	1	0	2	5	1	0	0	0	0	0	0	0	0	0	0	0	0	0	0	0	0	0	0	0	0	0	0	0	0	0	0	0	0	0	0	0	0	0	0	0	d__Bacteria; p__Firmicutes; c__Clostridia; o__Clostridiales; f__Lachnospiraceae; g__Roseburia
OTU_2749	0	1	1	2	3	0	4	17	1	2	1	2	1	0	1	0	0	0	0	0	0	0	0	0	0	0	0	0	0	0	0	0	0	0	0	0	0	0	0	0	0	0	0	0	0	d__Bacteria; p__Proteobacteria; c__Alphaproteobacteria; o__Rhodobacterales; f__Rhodobacteraceae; g__Rubellimicrobium
OTU_275	2	1	0	3	170	0	1	1	1	4	3	2	1	16	1	0	0	0	0	0	1	0	0	0	0	1	2	0	0	0	0	0	0	0	0	0	0	0	0	0	1	0	0	0	0	Unclassified
OTU_2750	0	1	0	0	2	1	1	0	3	0	1	0	0	0	2	0	0	0	0	0	0	0	0	0	0	0	0	0	0	0	0	0	0	0	0	0	0	0	0	0	0	0	0	0	0	d__Bacteria; p__Entotheonellaeota; c__Entotheonellia; o__Entotheonellales; f__Entotheonellaceae; g__Candidatus_Entotheonella; s__uncultured_bacterium
OTU_2751	0	0	0	0	0	0	0	0	0	0	0	0	0	0	0	0	0	0	1	0	2	1	1	1	34	0	1	0	0	0	0	0	0	0	0	0	0	0	0	0	0	0	0	0	0	Unclassified
OTU_2752	0	0	0	0	2	0	0	0	0	1	0	0	0	0	0	0	0	0	0	0	0	0	0	0	0	0	0	0	0	0	0	0	0	0	0	0	0	0	0	0	0	0	0	0	0	Unclassified
OTU_2753	0	0	0	0	1	1	0	1	0	0	1	0	0	0	0	0	0	0	0	0	0	0	0	0	0	0	0	0	0	0	0	0	0	0	0	0	0	0	0	0	0	0	0	0	0	d__Bacteria; p__Firmicutes; c__Erysipelotrichia; o__Erysipelotrichales; f__Erysipelotrichaceae; g__Erysipelatoclostridium; s__uncultured_bacterium
OTU_2754	0	0	0	0	0	0	0	0	1	0	0	0	0	0	1	0	0	0	4	0	0	0	0	0	0	1	0	0	0	0	0	0	0	0	13	0	0	1	0	4	0	0	0	0	1	d__Bacteria
OTU_2755	0	0	2	0	0	1	0	0	1	0	0	1	0	0	0	0	0	0	0	0	0	0	0	0	0	0	0	0	0	0	0	0	0	0	1	0	0	0	0	0	0	0	0	0	0	d__Bacteria; p__Proteobacteria; c__Gammaproteobacteria; o__Salinisphaerales; f__Solimonadaceae; g__Polycyclovorans; s__uncultured_bacterium
OTU_2756	0	0	2	0	3	0	0	0	0	2	2	0	4	3	0	0	0	0	1	10	0	2	0	14	17	19	0	0	0	0	0	0	0	0	0	0	0	0	0	0	0	0	0	0	0	Unclassified
OTU_2757	0	1	0	2	0	0	1	0	1	0	0	0	0	0	0	0	0	0	2	0	0	0	0	0	1	0	0	0	0	0	0	0	0	0	0	0	0	0	0	0	0	0	0	0	0	d__Bacteria; p__Chloroflexi; c__Anaerolineae; o__Anaerolineales; f__Anaerolineaceae; g__uncultured
OTU_2758	0	1	0	0	0	0	0	0	0	0	0	1	0	0	0	0	0	0	0	1	0	0	0	1	0	0	0	0	0	0	0	14	0	6	0	0	0	1	0	0	3	0	0	3	0	d__Bacteria; p__Firmicutes; c__Bacilli; o__Lactobacillales; f__Streptococcaceae; g__Lactococcus; s__Lactococcus_lactis_subsp._lactis
OTU_2759	0	0	0	6	0	0	0	0	0	0	0	0	0	0	0	0	0	0	0	0	0	0	0	0	0	0	0	0	0	0	0	0	0	0	0	0	0	0	0	0	0	0	0	0	0	d__Bacteria; p__Verrucomicrobia; c__Verrucomicrobiae; o__Chthoniobacterales; f__Chthoniobacteraceae; g__Chthoniobacter
OTU_276	46	8	3	40	19	8	22	34	7	102	71	57	16	6	6	0	0	0	0	0	2	0	0	0	5	1	3	0	2	1	0	0	0	0	0	0	0	0	0	0	0	0	0	0	0	d__Bacteria; p__Bacteroidetes; c__Bacteroidia; o__Cytophagales; f__Cytophagaceae; g__Rhodocytophaga; s__uncultured_Bacteroidetes_bacterium
OTU_2760	0	0	1	0	0	0	2	0	0	0	0	0	0	0	0	0	0	0	0	0	0	0	0	0	0	0	0	0	0	1	0	0	0	0	4	0	1	0	0	0	0	0	0	0	1	d__Bacteria; p__Proteobacteria; c__Gammaproteobacteria; o__Aeromonadales; f__Aeromonadaceae; g__Aeromonas
OTU_2761	0	0	0	0	0	0	0	0	0	0	0	0	0	0	0	0	0	1	0	0	0	0	0	0	0	0	0	0	0	0	8	1	0	2	1	4	2	1	0	2	2	0	1	1	2	d__Bacteria
OTU_2762	23	24	4	9	19	6	8	7	3	27	23	18	2	2	2	1	0	0	1	1	17	4	6	0	3	0	5	2	0	4	0	0	0	0	0	0	1	0	0	0	0	0	0	0	0	d__Bacteria; p__Bacteroidetes; c__Bacteroidia; o__Cytophagales; f__Hymenobacteraceae; g__Adhaeribacter; s__uncultured_bacterium
OTU_2763	0	0	1	0	0	0	1	0	1	1	1	0	1	2	0	0	0	0	0	0	0	0	0	0	0	0	0	0	0	0	0	0	0	0	0	0	0	0	0	0	0	0	0	0	0	d__Bacteria; p__Bacteroidetes; c__Bacteroidia; o__Sphingobacteriales; f__NS11_12_marine_group; g__NS11_12_marine_group_ge; s__metagenome
OTU_2764	4	2	4	0	0	0	0	1	2	3	2	0	0	0	1	0	0	0	0	0	0	0	0	0	0	0	0	0	0	0	0	0	0	0	0	0	0	0	0	0	0	0	0	0	0	d__Bacteria; p__Actinobacteria; c__Actinobacteria; o__Micromonosporales; f__Micromonosporaceae
OTU_2765	0	1	0	0	0	3	2	0	0	0	0	0	0	1	1	0	0	0	1	0	0	0	0	0	0	0	0	0	0	0	0	0	0	1	1	0	0	1	0	0	0	0	0	0	0	d__Bacteria; p__Chloroflexi; c__Gitt_GS_136; o__Gitt_GS_136_or; f__Gitt_GS_136_fa; g__Gitt_GS_136_ge; s__uncultured_bacterium
OTU_2766	0	0	0	1	0	0	3	2	1	1	0	0	0	0	0	0	0	0	0	0	0	0	0	0	0	0	0	0	0	0	0	0	0	0	0	0	0	0	0	0	0	0	0	0	0	d__Bacteria; p__Proteobacteria; c__Deltaproteobacteria; o__Myxococcales; f__Haliangiaceae; g__Haliangium
OTU_2767	0	0	0	0	0	0	0	0	0	0	0	0	0	0	0	0	0	3	0	0	0	1	0	0	0	1	1	0	0	0	0	0	0	0	0	0	6	6	0	1	4	1	3	0	2	d__Bacteria; p__Armatimonadetes; c__Armatimonadia; o__Armatimonadales; f__Armatimonadales_fa; g__Armatimonadales_ge
OTU_2768	0	0	0	0	0	0	0	0	0	0	0	0	0	0	0	0	0	0	16	4	1	1	0	0	1	0	1	0	0	1	0	0	0	0	0	0	0	0	0	0	0	0	0	0	0	d__Bacteria; p__Actinobacteria; c__Acidimicrobiia; o__Microtrichales; f__Ilumatobacteraceae; g__uncultured; s__uncultured_bacterium
OTU_277	6	5	5	84	18	10	2	10	10	14	6	4	40	28	9	0	0	7	1	1	19	0	0	0	3	1	1	1	1	0	0	1	0	0	1	2	2	1	1	1	3	0	0	1	0	d__Bacteria; p__Proteobacteria; c__Alphaproteobacteria; o__Rhizobiales; f__Devosiaceae; g__Devosia
OTU_2770	2	2	0	1	1	0	2	2	2	2	0	2	1	0	1	0	0	0	4	3	0	0	0	0	0	0	0	0	0	0	0	0	0	0	0	1	0	0	0	0	0	0	0	0	0	d__Bacteria; p__Bacteroidetes; c__Bacteroidia; o__Cytophagales; f__Microscillaceae; g__Ohtaekwangia
OTU_2771	0	0	0	0	0	0	0	0	1	0	0	0	0	1	1	0	0	0	0	0	0	0	0	0	0	0	0	0	0	0	0	0	0	0	0	0	0	0	0	0	0	0	0	0	0	d__Bacteria; p__Proteobacteria; c__Deltaproteobacteria; o__Myxococcales; f__P3OB_42; g__P3OB_42_ge
OTU_2772	1	1	0	0	0	0	0	0	1	1	0	1	0	0	0	0	0	0	0	0	0	0	0	0	0	0	0	0	0	0	0	0	0	0	0	0	0	0	0	0	0	0	0	0	0	d__Bacteria; p__Bacteroidetes; c__Bacteroidia; o__Bacteroidetes_VC2.1_Bac22; f__Bacteroidetes_VC2.1_Bac22_fa; g__Bacteroidetes_VC2.1_Bac22_ge; s__metagenome
OTU_2773	1	0	1	0	2	1	1	0	1	0	1	0	1	2	0	0	0	0	2	0	0	0	0	0	0	0	0	0	0	0	0	0	0	0	0	0	0	0	0	0	0	0	0	0	0	d__Bacteria; p__Proteobacteria; c__Alphaproteobacteria; o__Rhizobiales; f__Pleomorphomonadaceae; g__Chthonobacter
OTU_2774	0	0	2	0	2	0	2	0	0	4	0	0	0	0	0	0	0	0	0	0	0	0	0	0	0	0	0	0	0	0	0	0	0	0	0	0	0	0	0	0	0	0	0	0	0	d__Bacteria; p__Planctomycetes; c__Phycisphaerae; o__Tepidisphaerales; f__WD2101_soil_group; g__WD2101_soil_group_ge
OTU_2775	1	0	1	1	1	2	4	2	8	2	0	1	3	3	0	0	0	0	0	0	0	0	0	0	0	0	0	0	0	0	0	0	0	0	6	0	0	0	0	0	0	0	0	0	0	d__Bacteria; p__Proteobacteria; c__Gammaproteobacteria; o__Betaproteobacteriales; f__Nitrosomonadaceae; g__MND1
OTU_2776	0	0	0	0	0	1	2	0	0	0	0	0	0	0	0	0	0	0	0	0	0	0	0	0	0	0	0	0	0	0	0	0	0	0	0	0	0	0	0	0	0	0	0	0	0	d__Bacteria; p__Planctomycetes; c__Pla4_lineage; o__Pla4_lineage_or; f__Pla4_lineage_fa; g__Pla4_lineage_ge
OTU_2777	0	0	0	0	1	1	1	0	0	1	1	0	0	0	0	0	0	0	0	0	0	0	0	0	0	0	0	0	0	0	0	0	0	0	0	0	0	0	0	0	0	0	0	0	0	d__Bacteria; p__Proteobacteria; c__Alphaproteobacteria
OTU_2778	0	0	0	0	0	0	0	0	0	0	4	0	0	0	0	0	0	0	0	0	0	0	0	0	0	0	0	0	0	0	0	0	0	0	0	0	0	0	0	0	0	0	0	0	0	Unclassified
OTU_2779	0	1	2	0	1	0	1	0	5	5	1	0	1	1	0	0	0	0	0	1	0	0	0	0	0	0	0	0	0	0	0	0	0	1	0	0	1	0	0	0	0	0	0	0	0	d__Bacteria; p__Actinobacteria; c__Thermoleophilia; o__Solirubrobacterales; f__Solirubrobacteraceae; g__Parviterribacter; s__uncultured_bacterium
OTU_278	5	17	5	55	26	10	3	9	9	8	7	13	0	8	2	0	0	34	4	0	17	0	0	0	2	0	2	0	0	0	0	0	0	0	0	0	1	1	0	0	0	0	0	0	0	d__Bacteria; p__Proteobacteria; c__Deltaproteobacteria; o__Myxococcales; f__Polyangiaceae; g__Pajaroellobacter; s__uncultured_bacterium
OTU_2780	0	0	1	0	1	2	1	0	1	1	0	0	0	2	0	0	0	0	0	0	0	0	0	0	0	0	0	0	0	0	0	0	0	0	0	0	0	0	0	0	0	0	0	0	0	d__Bacteria; p__Planctomycetes; c__Phycisphaerae; o__Tepidisphaerales; f__WD2101_soil_group; g__WD2101_soil_group_ge; s__uncultured_bacterium
OTU_2781	0	0	0	0	1	0	0	0	1	1	0	0	2	0	0	0	0	0	0	0	0	0	0	0	0	0	0	0	0	0	0	0	0	0	0	0	0	0	0	0	0	0	0	0	0	d__Bacteria; p__Chlamydiae; c__Chlamydiae; o__Chlamydiales; f__cvE6; g__cvE6_ge
OTU_2782	0	0	0	1	0	1	0	3	1	0	3	0	1	1	0	0	0	0	0	0	0	0	0	0	0	0	0	0	0	0	0	0	0	0	0	0	0	0	0	0	0	0	0	0	0	d__Bacteria; p__Chloroflexi; c__Anaerolineae; o__Ardenticatenales; f__Ardenticatenaceae; g__uncultured
OTU_2784	0	0	0	0	0	0	0	0	0	0	0	0	0	0	0	2	0	3	0	0	1	0	0	0	0	0	0	0	0	0	0	0	0	0	0	1	1	1	0	1	7	0	3	1	1	d__Bacteria; p__Actinobacteria; c__Actinobacteria; o__Corynebacteriales; f__Nocardiaceae; g__Williamsia
OTU_2785	0	1	0	0	0	0	1	0	0	0	0	1	0	0	0	0	0	0	0	0	0	0	0	0	0	0	0	0	0	0	0	0	0	0	0	0	0	0	0	0	0	0	0	0	0	d__Bacteria; p__Bacteroidetes; c__Ignavibacteria; o__OPB56; f__OPB56_fa; g__OPB56_ge
OTU_2786	1	0	1	0	1	2	0	1	2	0	0	0	0	0	2	0	0	0	0	0	0	0	0	0	0	0	0	0	0	0	0	0	0	0	0	0	0	0	0	0	0	0	0	0	0	d__Bacteria; p__Verrucomicrobia; c__Verrucomicrobiae; o__Pedosphaerales; f__Pedosphaeraceae; g__Pedosphaeraceae_ge
OTU_2787	0	0	2	0	0	0	0	2	2	0	0	1	0	0	0	0	0	0	0	0	0	0	0	0	0	0	0	0	0	0	0	0	0	0	0	0	0	0	0	0	0	0	0	0	0	d__Bacteria; p__Gemmatimonadetes; c__Gemmatimonadetes; o__Gemmatimonadales; f__Gemmatimonadaceae; g__uncultured
OTU_2788	0	0	0	0	0	0	0	0	0	0	0	0	1	0	0	0	0	2	1	2	1	0	0	0	0	0	0	0	0	0	0	8	0	0	0	0	2	3	1	4	3	0	0	3	0	d__Bacteria; p__Patescibacteria; c__Saccharimonadia; o__Saccharimonadales; f__Saccharimonadales_fa; g__Saccharimonadales_ge; s__bacterium_LWQ8
OTU_2789	0	0	0	0	0	1	0	0	3	0	0	0	0	0	0	0	0	0	0	0	0	0	0	0	0	0	0	0	0	0	0	0	0	0	0	0	0	0	0	0	0	0	0	0	0	d__Bacteria; p__Verrucomicrobia; c__Verrucomicrobiae; o__Chthoniobacterales
OTU_279	23	46	23	15	18	9	35	21	37	54	22	28	10	7	16	0	0	0	6	1	1	7	0	0	14	1	1	0	2	0	0	2	0	2	0	0	0	0	0	0	0	0	0	0	0	d__Bacteria; p__Actinobacteria; c__Actinobacteria; o__Pseudonocardiales; f__Pseudonocardiaceae; g__Lechevalieria
OTU_2790	7	6	4	4	5	2	4	12	19	6	13	6	7	5	4	0	0	0	2	0	0	0	0	1	0	1	0	0	0	0	0	0	0	2	0	0	0	0	0	0	0	0	0	1	0	d__Bacteria; p__Proteobacteria; c__Deltaproteobacteria; o__Myxococcales; f__Myxococcaceae; g__Myxococcus
OTU_2791	1	0	2	1	0	0	0	1	0	0	0	0	0	0	0	0	0	0	0	0	0	0	0	0	0	0	0	0	0	0	0	0	0	0	0	0	0	0	0	0	0	0	0	0	0	d__Bacteria; p__Bacteroidetes; c__Bacteroidia; o__Flavobacteriales; f__Flavobacteriaceae; g__Gillisia; s__uncultured_bacterium
OTU_2792	0	0	0	0	0	0	0	0	0	2	0	0	3	0	0	0	0	0	1	1	1	0	0	0	4	0	0	1	0	0	0	0	0	0	0	0	0	0	0	0	0	0	0	0	0	Unclassified
OTU_2793	0	0	0	0	0	0	0	0	0	0	0	0	0	0	0	0	0	0	0	0	0	0	0	0	0	0	0	0	0	0	0	1	2	0	0	0	0	3	1	0	1	0	0	0	0	Unclassified
OTU_2794	0	0	0	0	0	0	0	0	0	0	0	0	0	0	0	0	0	0	0	0	0	0	0	0	0	0	0	0	0	0	0	0	0	4	21	4	0	4	0	3	0	0	0	4	16	d__Bacteria
OTU_2795	0	0	0	0	0	0	0	0	0	0	0	0	0	0	0	1	1	0	0	8	1	0	0	5	4	1	1	2	0	0	0	0	0	0	0	0	0	0	0	0	0	0	0	0	0	Unclassified
OTU_2796	0	0	0	0	1	0	1	0	1	0	0	2	0	0	0	0	0	0	0	0	0	0	0	0	0	0	0	0	0	0	0	0	0	0	0	0	0	0	0	0	0	0	0	0	0	d__Bacteria; p__Chloroflexi; c__Anaerolineae; o__Caldilineales; f__Caldilineaceae; g__uncultured; s__uncultured_bacterium
OTU_2797	0	0	0	1	1	0	1	1	0	0	0	0	0	0	0	0	0	0	0	0	0	0	0	0	0	0	0	0	0	0	0	0	0	0	0	0	0	0	0	0	0	0	0	0	0	d__Bacteria; p__Gemmatimonadetes; c__Gemmatimonadetes; o__Gemmatimonadales; f__Gemmatimonadaceae
OTU_2798	0	0	1	0	1	1	1	1	0	0	0	0	0	1	0	0	0	0	0	0	0	0	0	0	0	0	0	0	0	0	0	0	0	0	0	0	0	0	0	0	0	0	0	0	0	d__Bacteria; p__Acidobacteria; c__Acidobacteriia; o__Solibacterales; f__Solibacteraceae_Subgroup_3
OTU_2799	0	0	0	0	0	0	0	0	0	0	0	0	0	0	0	0	0	0	0	0	0	0	0	0	0	0	0	0	0	0	0	1	0	0	4	1	0	7	0	17	0	0	0	0	0	d__Bacteria
OTU_28	89	123	157	66	95	158	123	19	27	236	144	29	81	71	67	110	71	266	861	220	469	699	844	299	117	192	196	715	1369	1132	99	234	24	37	1	14	7	8	8	4	22	24	4	44	47	d__Bacteria; p__Bacteroidetes; c__Bacteroidia; o__Cytophagales; f__Hymenobacteraceae; g__Hymenobacter; s__uncultured_bacterium
OTU_280	0	1	0	0	0	0	0	0	1	0	0	0	0	2	0	20	8	68	1	1	5	1	2	1	3	0	8	0	3	2	0	0	0	15	1	2	25	3	0	8	5	3	57	1089	93	d__Bacteria; p__Bacteroidetes; c__Bacteroidia; o__Cytophagales; f__Spirosomaceae; g__Spirosoma
OTU_2800	0	0	0	0	4	1	1	0	0	0	0	0	0	0	0	0	0	0	0	0	0	0	0	0	0	0	0	0	0	0	0	0	0	0	0	0	0	0	0	0	0	0	0	0	0	d__Bacteria; p__Proteobacteria; c__Alphaproteobacteria; o__Sphingomonadales; f__Sphingomonadaceae
OTU_2801	0	0	0	0	2	0	0	0	1	2	1	1	0	1	2	0	0	0	0	0	1	0	0	0	0	0	0	0	0	0	0	0	0	0	0	0	0	0	0	0	0	0	0	0	0	d__Bacteria; p__Proteobacteria; c__Deltaproteobacteria; o__Myxococcales; f__Phaselicystidaceae; g__Phaselicystis; s__Phaselicystis_flava
OTU_2802	4	7	10	2	4	3	3	6	6	5	1	0	2	1	3	0	0	0	0	0	0	0	0	0	0	0	0	0	0	0	0	0	0	0	0	0	0	0	0	0	0	0	0	0	0	d__Bacteria; p__Actinobacteria; c__Acidimicrobiia; o__uncultured; f__uncultured_fa; g__uncultured_ge
OTU_2805	0	0	0	0	0	0	0	0	0	0	0	0	0	0	0	0	0	0	0	0	0	0	0	0	0	0	0	0	0	0	0	0	0	0	29	0	0	0	0	0	0	0	0	0	0	d__Bacteria; p__Patescibacteria; c__Saccharimonadia; o__Saccharimonadales; f__Saccharimonadaceae; g__Saccharimonadaceae_ge; s__uncultured_bacterium
OTU_2806	1	1	2	0	0	0	4	1	5	0	1	1	0	0	0	0	0	0	0	0	0	0	0	0	0	0	0	0	0	0	0	0	0	0	0	0	0	0	0	0	0	0	0	0	0	d__Bacteria; p__Chloroflexi; c__Anaerolineae; o__Ardenticatenales; f__Ardenticatenaceae; g__uncultured; s__uncultured_bacterium
OTU_2807	0	0	0	0	0	0	0	0	0	0	0	0	0	0	0	0	3	3	0	0	0	0	0	0	0	0	3	0	0	0	0	0	0	0	0	0	7	1	6	5	15	1	0	0	2	d__Bacteria; p__Proteobacteria
OTU_2808	1448	1499	403	686	3114	1257	2127	200	112	1151	553	124	1031	402	576	16	6	200	3	8	13	0	0	1	0	15	4	10	20	3	0	0	0	9	8	1	0	31	0	7	4	0	0	0	8	d__Bacteria; p__Bacteroidetes; c__Bacteroidia; o__Cytophagales; f__Spirosomaceae; g__Dyadobacter; s__metagenome
OTU_2810	1	2	3	2	0	0	2	1	3	0	0	0	0	0	1	0	0	0	0	0	0	0	0	0	0	0	0	0	0	0	0	0	0	0	0	0	0	0	0	0	0	0	0	0	0	d__Bacteria; p__Bacteroidetes; c__Bacteroidia; o__Chitinophagales; f__Chitinophagaceae; g__uncultured
OTU_2811	0	1	1	1	0	1	0	1	2	0	0	0	1	0	1	0	0	0	0	0	0	0	0	0	0	0	0	0	0	0	0	0	0	0	0	0	0	0	0	0	0	0	0	0	0	d__Bacteria; p__Acidobacteria; c__Acidobacteriia; o__Solibacterales; f__Solibacteraceae_Subgroup_3
OTU_2812	0	0	0	0	0	0	1	0	0	0	0	0	0	0	0	0	0	0	0	0	0	0	0	0	1	0	0	0	0	0	0	0	0	0	0	0	0	0	0	0	0	0	0	0	1	d__Bacteria; p__Planctomycetes; c__Planctomycetacia; o__Gemmatales; f__Gemmataceae; g__uncultured
OTU_2813	0	1	0	0	0	0	0	0	0	1	0	0	0	1	0	0	0	0	0	0	0	0	0	0	0	0	0	0	0	0	0	0	0	0	0	0	0	0	0	0	0	0	0	0	0	d__Bacteria; p__Acidobacteria; c__Holophagae; o__Subgroup_7; f__Subgroup_7_fa; g__Subgroup_7_ge
OTU_2814	1	0	0	0	2	0	0	3	1	0	0	1	0	0	0	0	0	0	0	0	0	0	0	0	0	0	0	0	0	0	0	0	0	0	0	0	0	0	0	0	0	0	0	0	0	d__Bacteria; p__Bacteroidetes; c__Bacteroidia; o__Cytophagales; f__Cyclobacteriaceae; g__uncultured
OTU_2815	0	0	3	0	1	1	0	0	0	0	1	1	1	0	0	0	0	0	1	0	0	0	0	0	0	0	0	0	0	0	0	0	0	0	2	0	0	0	0	0	0	0	0	0	0	d__Bacteria; p__Acidobacteria; c__Thermoanaerobaculia; o__Thermoanaerobaculales; f__Thermoanaerobaculaceae; g__Subgroup_10
OTU_2816	1	1	0	0	0	0	0	0	0	0	1	1	0	0	0	0	0	9	0	0	0	0	0	0	0	0	0	0	0	0	0	0	0	0	0	0	0	1	0	0	0	0	0	0	0	d__Bacteria; p__Verrucomicrobia; c__Verrucomicrobiae; o__Chthoniobacterales; f__Chthoniobacteraceae; g__Chthoniobacter
OTU_2817	50	43	56	15	8	62	51	1	6	56	14	10	25	46	17	133	75	337	28	130	260	135	165	167	48	92	108	492	211	154	1	5	10	3	0	1	1	1	6	2	2	0	19	25	18	d__Bacteria; p__Actinobacteria; c__Actinobacteria; o__Kineosporiales; f__Kineosporiaceae
OTU_2818	0	2	1	0	0	0	0	0	0	0	0	0	0	0	0	0	8	0	0	0	0	0	0	0	0	0	0	0	0	0	0	1	0	1	0	0	0	0	1	0	2	0	0	0	1	Unclassified
OTU_2819	2	0	2	0	0	0	1	0	4	0	2	1	0	0	1	0	0	0	1	0	0	0	0	0	0	0	0	0	0	0	0	0	0	0	0	0	0	0	0	0	0	0	0	0	0	d__Bacteria; p__Acidobacteria; c__Subgroup_17; o__Subgroup_17_or; f__Subgroup_17_fa; g__Subgroup_17_ge; s__uncultured_bacterium
OTU_2820	0	0	0	2	0	0	0	0	0	0	0	0	0	1	0	0	0	0	0	0	0	0	0	0	0	0	0	0	0	0	0	0	0	0	0	0	0	0	0	0	0	0	0	0	0	d__Bacteria
OTU_2821	1	0	2	1	0	1	1	0	0	1	0	0	0	0	0	0	0	0	1	0	0	0	0	0	0	0	0	0	0	0	0	0	0	0	0	0	0	0	0	0	0	0	0	0	0	d__Bacteria; p__Proteobacteria; c__Deltaproteobacteria; o__NB1_j; f__NB1_j_fa; g__NB1_j_ge
OTU_2823	0	0	0	1	0	0	0	0	1	0	0	0	0	0	0	0	0	0	3	2	0	0	0	0	0	0	0	0	0	0	0	0	0	0	1	0	0	0	0	0	0	0	0	0	0	d__Bacteria; p__Acidobacteria; c__Subgroup_6
OTU_2824	0	0	1	5	0	1	0	0	1	3	3	1	2	62	0	1	13	34	1	0	2	12	8	2	0	0	1	5	88	1	1	8	6	8	0	0	13	4	6	12	8	1	2	18	8	d__Bacteria; p__Bacteroidetes; c__Bacteroidia; o__Cytophagales; f__Spirosomaceae; g__Spirosoma
OTU_2825	0	0	2	0	0	0	0	0	2	2	0	1	1	2	0	0	0	0	0	0	0	0	0	0	0	0	0	0	0	0	0	0	0	0	0	0	0	0	0	0	0	0	0	0	0	d__Bacteria; p__Acidobacteria; c__Subgroup_6; o__Subgroup_6_or; f__Subgroup_6_fa; g__Subgroup_6_ge; s__uncultured_bacterium
OTU_2826	1	0	0	0	1	0	1	0	0	1	2	1	1	0	0	0	0	0	1	1	1	0	0	0	2	1	0	0	0	0	0	0	0	1	0	0	1	1	0	1	2	0	0	0	0	d__Bacteria; p__Gemmatimonadetes; c__Gemmatimonadetes; o__Gemmatimonadales; f__Gemmatimonadaceae; g__Gemmatirosa
OTU_2827	0	1	0	0	0	1	0	1	2	1	0	1	1	1	0	0	0	0	0	0	0	0	0	0	0	0	0	0	0	0	0	0	0	0	0	0	0	0	0	0	0	0	0	0	0	d__Bacteria; p__Actinobacteria; c__Acidimicrobiia
OTU_2828	0	1	0	0	1	1	1	3	2	0	0	1	2	0	0	0	0	0	2	0	0	0	0	0	0	0	1	0	0	0	0	0	0	1	0	0	0	1	0	0	0	0	0	1	0	d__Bacteria; p__Planctomycetes; c__Planctomycetacia; o__Gemmatales; f__Gemmataceae; g__Gemmata
OTU_283	4	2	1	1	1	3	0	0	0	2	4	1	0	3	0	37	9	46	18	5	105	227	162	40	8	35	115	118	98	185	9	9	9	3	0	9	5	1	0	14	6	1	53	116	95	d__Bacteria; p__Proteobacteria; c__Alphaproteobacteria; o__Sphingomonadales; f__Sphingomonadaceae
OTU_2830	2	1	1	0	0	0	0	0	0	2	0	0	1	1	1	1	0	0	0	0	0	0	0	0	0	0	0	0	0	0	0	0	0	0	0	0	0	0	0	0	0	0	0	0	0	d__Bacteria; p__Planctomycetes; c__Planctomycetacia; o__Pirellulales; f__Pirellulaceae; g__Pirellula
OTU_2831	1	1	0	0	2	0	2	0	2	0	0	0	0	1	0	0	0	0	0	0	0	0	0	0	0	0	0	0	0	0	0	0	0	0	0	0	0	0	0	0	0	0	0	0	0	d__Bacteria; p__Chloroflexi; c__Chloroflexia; o__Kallotenuales; f__AKIW781; g__AKIW781_ge; s__uncultured_bacterium
OTU_2832	11	12	4	2	11	4	9	10	10	10	16	9	4	3	2	0	0	0	1	0	0	1	0	0	0	2	0	0	0	0	0	0	0	0	1	0	0	0	0	0	2	0	0	0	0	d__Bacteria; p__Proteobacteria; c__Alphaproteobacteria; o__Azospirillales; f__Azospirillaceae
OTU_2833	0	0	0	0	0	1	0	0	0	1	0	0	0	1	0	0	0	0	0	0	0	0	0	0	0	1	0	0	1	0	2	0	0	4	0	0	0	0	2	0	0	0	0	0	0	d__Bacteria; p__Proteobacteria; c__Gammaproteobacteria; o__Betaproteobacteriales; f__Neisseriaceae; g__uncultured; s__uncultured_beta_proteobacterium
OTU_2834	0	0	0	0	0	0	0	0	0	0	0	0	0	0	0	2	0	4	0	0	1	0	0	0	3	0	0	0	0	0	0	0	0	0	0	0	0	0	3	0	0	0	1	2	1	d__Bacteria; p__Deinococcus_Thermus; c__Deinococci; o__Deinococcales; f__Deinococcaceae; g__Deinococcus; s__Deinococcus_sp._A2_599
OTU_2835	0	0	0	0	0	0	0	0	0	0	0	0	0	0	0	2	1	0	0	0	0	0	0	0	0	0	0	0	0	0	0	0	2	0	0	0	1	0	2	0	0	0	0	0	0	d__Bacteria; p__Proteobacteria; c__Alphaproteobacteria; o__Acetobacterales; f__Acetobacteraceae; g__Acidiphilium; s__uncultured_alpha_proteobacterium
OTU_2836	2	1	1	0	2	0	0	2	2	6	0	0	1	1	0	0	0	0	0	0	0	0	0	0	0	0	1	0	0	0	0	0	0	0	0	0	0	0	0	0	0	0	0	0	0	d__Bacteria; p__Planctomycetes; c__Planctomycetacia; o__Pirellulales; f__Pirellulaceae; g__Pirellula; s__uncultured_planctomycete
OTU_2837	0	0	1	0	0	1	0	0	0	0	0	0	0	0	0	0	0	0	1	0	0	0	0	0	0	0	0	0	0	0	0	0	0	0	0	0	0	1	0	0	0	0	0	0	0	d__Bacteria; p__Latescibacteria; c__Latescibacteria_cl; o__Latescibacteria_or; f__Latescibacteria_fa; g__Latescibacteria_ge
OTU_2838	0	0	1	2	0	0	0	2	0	0	0	0	0	0	0	0	0	0	0	0	0	0	0	0	0	0	0	0	0	0	0	0	0	0	0	0	0	0	0	0	0	0	0	0	0	d__Bacteria; p__Bacteroidetes; c__Bacteroidia; o__Cytophagales
OTU_2839	1	0	0	0	0	0	0	0	0	0	1	0	0	0	0	0	0	0	1	1	0	0	0	0	0	0	0	0	0	3	0	0	0	0	3	0	0	0	0	1	0	0	0	0	0	d__Bacteria; p__Bacteroidetes; c__Bacteroidia; o__Sphingobacteriales; f__Sphingobacteriaceae; g__Sphingobacterium; s__Sphingobacterium_multivorum
OTU_284	18	0	4	0	0	112	2	0	0	1	1	0	1	1	0	0	0	0	0	0	0	0	0	0	0	0	0	0	0	0	0	0	0	0	0	0	0	0	0	0	0	0	0	0	0	Unclassified
OTU_2840	0	0	0	0	0	0	0	1	0	1	1	0	0	1	1	0	0	0	0	0	0	1	0	0	0	0	0	1	0	3	0	0	0	6	0	0	0	0	0	2	0	0	0	7	1	d__Bacteria; p__Proteobacteria; c__Alphaproteobacteria; o__Sphingomonadales; f__Sphingomonadaceae
OTU_2841	5	27	3	9	18	13	1	7	2	24	9	1	8	5	3	0	0	0	0	0	0	0	0	0	2	0	0	0	0	0	0	0	0	0	0	0	0	0	0	0	0	0	0	0	0	d__Bacteria; p__Proteobacteria; c__Alphaproteobacteria; o__Sphingomonadales; f__Sphingomonadaceae; g__Altererythrobacter; s__uncultured_bacterium
OTU_2842	0	0	0	0	0	0	1	1	0	0	0	0	0	0	0	1	0	0	15	0	0	0	0	0	1	0	0	0	0	0	0	0	0	0	0	0	0	0	0	0	0	0	0	0	0	d__Bacteria
OTU_2843	2	7	2	2	5	3	7	4	5	3	8	6	3	1	4	0	0	0	0	0	0	0	0	0	1	0	0	0	0	0	0	0	0	0	0	0	0	0	0	0	1	0	0	0	0	d__Bacteria; p__Proteobacteria; c__Alphaproteobacteria; o__Rhizobiales; f__Beijerinckiaceae
OTU_2844	5	7	4	7	5	4	17	15	21	8	4	7	3	7	4	0	0	0	0	0	0	0	0	1	0	0	0	0	0	0	0	0	0	0	0	0	0	0	0	0	0	0	0	0	0	d__Bacteria; p__Gemmatimonadetes; c__Gemmatimonadetes; o__Gemmatimonadales; f__Gemmatimonadaceae
OTU_2845	0	0	0	0	0	0	0	2	0	0	0	0	0	0	0	0	0	0	0	0	0	0	0	0	0	0	0	0	0	0	0	0	0	0	0	0	0	0	0	0	0	0	0	0	0	d__Bacteria; p__Acidobacteria; c__Acidobacteriia; o__Solibacterales; f__Solibacteraceae_Subgroup_3; g__Bryobacter
OTU_2846	0	1	0	0	0	0	1	0	0	0	0	0	0	0	0	0	0	0	0	0	0	0	0	0	0	0	0	0	0	0	0	0	0	0	0	0	0	0	0	0	0	0	0	0	0	d__Bacteria; p__Proteobacteria; c__Gammaproteobacteria; o__Pseudomonadales; f__Pseudomonadaceae; g__Pseudomonas; s__Pseudomonas_caeni
OTU_2847	0	0	0	0	0	0	0	0	0	0	0	0	0	0	0	0	0	0	0	0	0	0	0	0	0	0	0	0	0	0	0	0	0	0	0	0	0	4	2	0	0	0	0	0	0	d__Bacteria; p__Proteobacteria; c__Gammaproteobacteria; o__Diplorickettsiales; f__Diplorickettsiaceae; g__Diplorickettsia
OTU_2848	0	0	0	0	0	0	1	0	1	0	0	1	0	0	0	0	0	0	0	1	0	0	0	0	0	0	1	0	0	0	0	0	0	0	0	0	0	0	0	0	0	0	0	0	0	d__Bacteria; p__Planctomycetes; c__Pla4_lineage; o__Pla4_lineage_or; f__Pla4_lineage_fa; g__Pla4_lineage_ge; s__metagenome
OTU_2849	0	0	0	0	0	1	0	0	0	1	1	0	0	0	0	0	0	0	0	0	0	0	0	0	0	0	0	0	0	0	0	0	0	0	0	0	0	0	0	0	0	0	0	0	0	d__Bacteria; p__Bacteroidetes; c__Bacteroidia; o__Cytophagales; f__Cytophagaceae; g__Sporocytophaga
OTU_285	1	5	0	0	0	0	2	0	0	9	11	2	1	2	0	81	19	35	5	2	580	255	452	48	6	45	85	21	71	31	10	27	5	10	4	5	9	2	3	18	42	11	12	55	48	d__Bacteria; p__Armatimonadetes; c__Fimbriimonadia; o__Fimbriimonadales; f__Fimbriimonadaceae; g__Fimbriimonadaceae_ge
OTU_2850	0	1	0	0	0	1	0	1	1	0	0	0	0	0	0	0	0	0	0	0	0	0	0	0	0	0	0	0	0	0	0	0	0	0	0	0	0	0	0	0	0	0	0	0	0	d__Bacteria; p__Chloroflexi; c__OLB14; o__OLB14_or; f__OLB14_fa; g__OLB14_ge
OTU_2851	0	0	1	1	0	0	2	1	0	0	0	1	0	0	0	0	0	0	0	0	0	0	0	0	0	0	0	0	0	0	0	0	0	0	0	0	0	0	0	0	0	0	0	0	0	d__Bacteria; p__Gemmatimonadetes; c__BD2_11_terrestrial_group; o__BD2_11_terrestrial_group_or; f__BD2_11_terrestrial_group_fa; g__BD2_11_terrestrial_group_ge; s__metagenome
OTU_2852	0	0	0	0	0	1	1	0	0	1	0	0	0	0	0	0	0	0	0	0	0	0	0	0	0	1	0	0	0	0	0	0	0	0	0	0	0	0	0	0	0	0	0	0	0	d__Bacteria; p__Planctomycetes; c__Planctomycetacia; o__Gemmatales; f__Gemmataceae
OTU_2853	0	1	0	0	1	0	1	0	2	2	0	0	1	0	0	0	0	0	1	2	0	2	0	0	0	2	0	0	0	220	1	0	0	11	3	155	1	2	0	2	0	0	0	0	0	d__Bacteria; p__Proteobacteria; c__Gammaproteobacteria; o__Xanthomonadales; f__Xanthomonadaceae; g__Stenotrophomonas; s__Stenotrophomonas_rhizophila
OTU_2854	6	8	4	7	19	6	6	9	6	18	15	16	0	4	3	1	1	11	6	7	49	2	2	0	11	2	16	0	8	2	0	1	0	25	5	0	3	0	0	0	4	1	2	2	1	d__Bacteria; p__Actinobacteria; c__Actinobacteria; o__Propionibacteriales; f__Nocardioidaceae; g__Marmoricola
OTU_2855	0	1	0	0	0	0	0	0	0	0	1	1	0	0	0	0	0	0	0	0	0	0	0	0	0	0	0	0	0	0	0	0	0	0	0	0	0	0	0	0	0	0	0	0	0	d__Bacteria; p__Proteobacteria; c__Alphaproteobacteria; o__Tistrellales; f__Geminicoccaceae
OTU_2856	0	0	0	0	0	0	0	0	0	0	0	0	0	0	0	0	0	0	0	0	0	0	0	0	0	0	0	0	0	0	0	0	0	6	0	0	0	0	0	0	0	0	0	0	0	Unclassified
OTU_2857	0	1	0	0	1	0	0	0	1	0	0	1	1	0	0	0	0	0	0	0	0	0	0	0	1	0	0	0	0	0	0	0	0	0	0	0	0	0	0	0	0	0	0	0	0	d__Bacteria; p__Planctomycetes; c__Planctomycetacia; o__Planctomycetales; f__uncultured; g__uncultured_ge
OTU_2858	0	0	0	0	1	0	0	1	1	0	0	1	1	0	0	0	0	0	0	0	0	0	0	0	0	0	0	0	0	0	0	0	0	0	0	0	0	0	0	0	0	0	0	0	0	d__Bacteria; p__Planctomycetes; c__Phycisphaerae; o__Tepidisphaerales; f__WD2101_soil_group; g__WD2101_soil_group_ge; s__uncultured_planctomycete
OTU_2859	0	0	1	0	0	0	1	2	0	0	0	1	0	0	0	0	0	0	16	0	1	0	0	0	3	1	1	0	1	1	0	0	0	0	2	0	0	0	0	0	0	0	0	0	0	d__Bacteria; p__Bacteroidetes; c__Bacteroidia; o__Chitinophagales; f__Chitinophagaceae; g__Dinghuibacter
OTU_2860	0	1	1	0	0	0	0	0	0	4	0	0	0	0	0	0	0	0	0	0	0	0	0	0	1	0	0	0	0	0	0	0	0	0	0	0	0	0	0	0	0	0	0	0	0	d__Bacteria; p__Planctomycetes; c__Phycisphaerae; o__Tepidisphaerales; f__WD2101_soil_group; g__WD2101_soil_group_ge
OTU_2861	0	0	1	0	0	1	2	0	0	0	0	0	0	0	1	0	0	0	0	1	0	0	0	0	0	2	0	0	0	0	0	0	0	0	0	0	0	0	0	0	0	0	0	0	0	d__Bacteria; p__Firmicutes; c__Bacilli; o__Lactobacillales; f__Lactobacillaceae; g__Lactobacillus
OTU_2862	0	0	0	0	1	0	0	0	2	0	0	0	1	0	1	0	0	0	1	0	0	0	0	0	0	0	0	0	0	0	0	0	0	0	0	0	0	0	0	0	0	0	0	0	0	d__Bacteria; p__Proteobacteria; c__Deltaproteobacteria; o__Myxococcales; f__27F_1492R; g__27F_1492R_ge; s__uncultured_bacterium
OTU_2864	0	0	0	0	1	1	0	0	0	4	0	1	0	0	1	6	0	10	4	1	17	7	5	2	7	35	8	0	12	5	0	1	0	6	1	0	0	2	0	3	3	0	1	2	4	d__Bacteria; p__Actinobacteria; c__Actinobacteria; o__Propionibacteriales; f__Propionibacteriaceae
OTU_2865	0	0	0	0	0	0	0	0	0	0	0	0	0	0	0	0	0	3	0	0	0	0	0	0	0	9	0	0	0	0	0	0	0	0	0	0	0	0	0	0	0	0	0	0	0	d__Bacteria; p__Proteobacteria; c__Deltaproteobacteria; o__Oligoflexales; f__0319_6G20; g__0319_6G20_ge
OTU_2866	0	1	0	0	0	1	1	3	2	0	1	1	0	1	1	0	0	0	0	0	0	0	0	0	0	1	0	0	0	0	0	0	0	0	1	0	0	0	0	0	0	0	0	0	0	d__Bacteria; p__Chloroflexi; c__Chloroflexia; o__Thermomicrobiales; f__JG30_KF_CM45; g__JG30_KF_CM45_ge
OTU_2867	0	0	1	1	0	1	1	1	0	0	0	0	0	0	0	0	0	0	0	0	0	0	0	0	0	0	0	0	0	0	0	0	0	0	0	0	0	0	0	0	0	0	0	0	0	d__Bacteria; p__Proteobacteria; c__Deltaproteobacteria; o__Myxococcales; f__P3OB_42; g__P3OB_42_ge; s__uncultured_Myxococcales_bacterium
OTU_2868	1	0	0	0	1	0	1	1	1	3	0	1	1	1	2	0	0	1	2	0	0	0	0	0	0	0	0	0	0	1	0	2	1	1	0	2	0	1	0	0	1	1	1	0	0	d__Bacteria; p__Proteobacteria; c__Deltaproteobacteria; o__Oligoflexales; f__0319_6G20; g__0319_6G20_ge
OTU_2869	0	0	0	0	0	0	0	0	0	0	0	0	0	0	0	0	0	0	0	0	0	0	0	0	0	0	0	0	0	0	8	0	4	0	0	0	0	0	0	0	4	0	0	0	0	d__Bacteria; p__Armatimonadetes; c__Armatimonadia; o__Armatimonadales; f__Armatimonadales_fa; g__Armatimonadales_ge
OTU_287	11	13	24	5	5	5	22	2	4	14	13	121	10	9	10	1	2	0	177	12	20	8	3	3	53	12	16	0	4	0	1	1	1	0	36	0	3	3	1	2	0	0	0	0	1	d__Bacteria; p__Firmicutes; c__Bacilli; o__Bacillales; f__Planococcaceae
OTU_2870	0	0	0	0	0	0	0	0	0	0	0	0	0	0	0	0	0	0	0	0	0	0	0	0	0	0	0	0	0	0	0	1	0	7	0	0	1	0	0	0	0	0	0	0	0	d__Bacteria; p__Bacteroidetes; c__Bacteroidia; o__Sphingobacteriales; f__Sphingobacteriaceae
OTU_2871	1	0	5	0	1	2	8	1	1	1	0	0	1	1	0	0	0	0	4	0	0	0	0	0	0	1	0	0	0	0	0	0	0	0	2	0	0	0	0	0	0	0	0	0	0	d__Bacteria; p__Gemmatimonadetes; c__Gemmatimonadetes; o__Gemmatimonadales; f__Gemmatimonadaceae; g__uncultured
OTU_2872	1	0	1	0	1	2	2	3	5	4	2	1	2	3	0	0	0	0	2	0	1	0	0	0	0	0	1	0	0	0	0	0	0	0	0	0	0	0	0	0	0	0	0	0	0	d__Bacteria; p__Gemmatimonadetes; c__Gemmatimonadetes; o__Gemmatimonadales; f__Gemmatimonadaceae; g__Gemmatirosa; s__uncultured_bacterium
OTU_2873	0	0	0	0	0	0	0	0	2	1	0	0	0	0	0	0	0	0	0	0	1	0	0	0	0	0	0	0	0	0	0	0	0	0	0	0	0	0	0	0	0	0	0	0	0	d__Bacteria; p__Planctomycetes; c__Planctomycetacia; o__Pirellulales; f__Pirellulaceae; g__Pirellula; s__metagenome
OTU_2874	0	0	1	1	2	2	0	2	0	0	4	3	2	0	0	0	0	0	0	0	0	0	0	0	0	0	0	0	0	0	0	0	0	0	0	0	0	0	0	0	0	0	0	0	0	d__Bacteria; p__Chloroflexi; c__Chloroflexia; o__Chloroflexales; f__Chloroflexaceae; g__Chloronema; s__uncultured_bacterium
OTU_2876	0	0	0	0	0	0	0	0	0	0	1	0	0	0	0	0	0	0	11	1	0	1	1	0	2	0	4	0	1	0	0	0	0	0	0	0	0	0	0	0	0	0	0	0	0	d__Bacteria; p__Firmicutes; c__Bacilli; o__Bacillales; f__Bacillaceae; g__Bacillus; s__Bacillus_thermoamylovorans
OTU_2878	0	0	0	0	0	0	0	1	0	0	0	0	1	0	0	0	0	0	0	0	0	0	0	0	0	0	0	0	0	0	0	0	0	0	0	0	1	0	0	0	0	0	0	0	0	d__Bacteria; p__Firmicutes; c__Bacilli; o__Lactobacillales; f__Carnobacteriaceae; g__Marinilactibacillus; s__Marinilactibacillus_psychrotolerans
OTU_2879	0	0	0	0	0	0	0	0	0	0	0	0	0	0	0	10	0	7	0	0	4	0	3	0	0	1	0	0	0	0	0	0	0	0	0	0	0	0	0	0	0	0	0	0	0	d__Bacteria; p__Proteobacteria; c__Alphaproteobacteria; o__Sphingomonadales; f__Sphingomonadaceae; g__Rhizorhapis; s__metagenome
OTU_288	189	228	678	137	227	307	419	25	35	517	426	34	130	372	98	11	26	58	4	0	235	191	91	6	0	13	11	2	9	12	337	305	83	20	14	29	58	110	57	41	137	48	25	26	112	d__Bacteria; p__Bacteroidetes; c__Bacteroidia; o__Cytophagales; f__Hymenobacteraceae; g__Hymenobacter
OTU_2880	0	2	6	1	2	1	4	3	4	1	2	0	1	0	2	0	0	0	3	2	1	1	0	0	0	1	0	0	0	0	0	0	0	0	3	0	1	0	0	0	0	0	0	1	0	d__Bacteria; p__Actinobacteria; c__Thermoleophilia; o__Gaiellales; f__Gaiellaceae; g__Gaiella; s__uncultured_Conexibacteraceae_bacterium
OTU_2881	0	1	1	0	1	0	0	1	2	0	0	0	0	0	1	0	0	0	0	0	0	0	0	0	0	0	0	0	0	0	0	0	0	0	0	0	0	0	0	0	0	0	0	0	0	d__Bacteria; p__Gemmatimonadetes; c__S0134_terrestrial_group; o__S0134_terrestrial_group_or; f__S0134_terrestrial_group_fa; g__S0134_terrestrial_group_ge
OTU_2882	0	2	0	0	1	0	0	0	0	0	0	1	0	0	0	0	0	0	0	0	0	0	0	0	0	0	0	0	0	0	0	0	0	0	0	0	0	0	0	0	0	0	0	0	0	d__Bacteria; p__Proteobacteria; c__Gammaproteobacteria; o__Cardiobacteriales; f__Wohlfahrtiimonadaceae; g__Wohlfahrtiimonas
OTU_2883	3	2	0	29	4	0	2	2	0	2	3	4	0	0	1	0	0	0	1	0	12	0	0	0	1	0	1	0	0	0	0	0	0	0	0	0	0	0	0	0	0	0	0	0	0	d__Bacteria; p__Bacteroidetes; c__Bacteroidia; o__Cytophagales; f__Cytophagaceae; g__Rhodocytophaga
OTU_2884	0	0	0	0	0	0	0	0	0	0	0	0	2	2	0	0	2	0	2	0	3	1	2	0	0	0	3	0	0	0	0	0	0	0	0	0	0	0	0	0	0	0	0	0	0	Unclassified
OTU_2886	1	0	0	1	0	0	0	0	1	0	0	0	0	0	0	0	0	0	0	0	1	0	0	0	0	0	0	0	0	0	0	0	0	0	0	0	0	0	0	0	0	0	0	0	0	d__Bacteria; p__Proteobacteria; c__Gammaproteobacteria; o__Xanthomonadales; f__Xanthomonadaceae; g__Lysobacter
OTU_2887	0	0	0	0	2	0	0	0	2	0	0	0	0	0	0	0	0	0	0	0	0	0	0	0	0	0	0	0	0	0	0	0	0	0	0	0	0	0	0	0	0	0	0	0	0	d__Bacteria; p__Proteobacteria; c__Deltaproteobacteria; o__Bdellovibrionales; f__Bdellovibrionaceae; g__Bdellovibrio; s__uncultured_bacterium
OTU_2888	0	0	1	0	0	0	2	1	1	1	1	0	1	0	0	0	0	0	0	0	0	0	0	0	0	0	0	0	0	0	0	0	0	0	0	0	0	0	0	0	0	0	0	0	0	d__Bacteria; p__Planctomycetes; c__OM190; o__OM190_or; f__OM190_fa; g__OM190_ge; s__uncultured_bacterium
OTU_2889	0	4	0	0	2	0	0	0	0	2	1	4	0	0	0	0	0	0	0	0	0	0	0	0	0	0	0	0	0	0	0	0	0	0	0	0	0	0	0	0	0	0	0	0	0	d__Bacteria; p__Bacteroidetes; c__Bacteroidia; o__Cytophagales; f__Hymenobacteraceae; g__Hymenobacter
OTU_289	25	24	19	27	14	23	36	28	79	26	12	16	26	8	16	0	0	0	2	0	1	0	1	0	1	0	0	0	0	0	0	0	0	0	0	0	0	0	0	0	0	0	0	0	0	d__Bacteria; p__Actinobacteria; c__Rubrobacteria; o__Rubrobacterales; f__Rubrobacteriaceae; g__Rubrobacter; s__uncultured_Rubrobacter_sp.
OTU_2890	2	1	3	0	3	2	7	4	4	3	2	6	0	0	1	0	0	0	0	0	0	0	0	0	0	0	0	0	0	0	0	0	0	0	0	0	0	0	0	0	0	0	0	1	0	d__Bacteria; p__Proteobacteria; c__Alphaproteobacteria; o__Rhizobiales; f__uncultured; g__uncultured_ge
OTU_2891	1	2	0	1	0	0	1	0	0	0	1	0	2	0	0	0	0	0	0	1	0	0	0	0	0	0	1	0	0	0	0	0	0	0	0	0	0	0	0	0	0	0	0	0	0	d__Bacteria; p__Planctomycetes; c__Planctomycetacia; o__Planctomycetales; f__uncultured; g__uncultured_ge
OTU_2892	1	2	1	1	1	0	5	2	2	0	0	0	1	1	2	0	0	0	4	0	1	0	0	0	1	0	0	0	0	0	0	0	0	0	1	0	0	0	0	0	0	0	0	0	0	d__Bacteria; p__Actinobacteria; c__Acidimicrobiia; o__Microtrichales; f__Ilumatobacteraceae; g__Ilumatobacter; s__uncultured_bacterium
OTU_2893	0	0	0	0	0	0	0	0	1	0	0	0	0	0	0	1	3	0	0	0	0	4	1	3	0	1	4	0	0	0	0	0	0	0	0	0	0	0	0	0	0	0	0	0	0	d__Bacteria; p__Proteobacteria; c__Gammaproteobacteria; o__Diplorickettsiales; f__Diplorickettsiaceae; g__uncultured; s__uncultured_Coxiellaceae_bacterium
OTU_2894	0	1	0	0	0	0	1	0	0	0	0	0	0	1	0	0	0	0	0	0	0	0	0	0	0	0	0	0	0	0	0	0	0	0	0	0	0	0	0	1	0	0	0	0	0	d__Bacteria; p__Firmicutes; c__Clostridia; o__Clostridiales; f__Clostridiaceae_1; g__Clostridium_sensu_stricto_1; s__uncultured_Clostridium_sp.
OTU_2895	0	0	0	0	0	0	2	0	1	0	0	1	0	0	1	0	0	0	1	0	0	0	0	0	0	0	0	0	0	0	0	0	0	0	0	0	0	0	0	0	0	0	0	0	0	d__Bacteria; p__Proteobacteria; c__Deltaproteobacteria; o__Myxococcales; f__Nannocystaceae; g__Nannocystis; s__Nannocystis_pusilla
OTU_2896	0	0	0	0	0	1	0	0	0	0	0	1	0	1	0	0	0	0	0	0	0	0	0	0	0	0	0	0	0	0	0	0	0	0	0	0	0	0	0	0	0	0	0	0	0	d__Bacteria; p__Planctomycetes; c__Phycisphaerae; o__Phycisphaerales; f__Phycisphaeraceae; g__uncultured; s__uncultured_bacterium
OTU_2897	0	0	0	0	0	0	0	1	1	1	0	0	0	0	0	0	0	0	1	0	0	0	0	0	0	0	0	0	0	0	0	0	0	0	0	0	0	0	0	0	0	0	0	0	0	d__Bacteria; p__Armatimonadetes; c__uncultured; o__uncultured_or; f__uncultured_fa; g__uncultured_ge; s__uncultured_bacterium
OTU_2898	0	1	0	0	0	1	0	0	1	0	0	0	0	1	0	0	0	0	0	0	0	0	0	0	0	0	0	0	0	0	0	0	0	0	0	0	0	0	0	0	0	0	0	0	0	d__Bacteria; p__Chloroflexi; c__Anaerolineae; o__SBR1031; f__A4b; g__A4b_ge; s__uncultured_bacterium
OTU_2899	0	2	1	0	0	0	0	1	0	0	0	1	0	1	0	0	0	0	0	0	0	0	0	0	0	0	0	0	0	0	0	0	0	0	0	0	0	0	0	0	0	0	0	0	0	d__Bacteria
OTU_29	770	795	350	306	877	338	738	116	118	985	708	163	343	339	106	74	27	368	54	53	1029	384	777	142	96	307	430	164	415	444	42	86	73	36	3	9	30	12	43	29	44	20	146	346	203	d__Bacteria; p__Proteobacteria; c__Alphaproteobacteria; o__Acetobacterales; f__Acetobacteraceae; g__Roseomonas; s__uncultured_bacterium
OTU_2901	2	2	3	2	0	1	8	7	6	5	4	8	4	0	1	0	0	1	9	0	0	3	0	1	4	2	1	0	1	2	1	1	0	1	10	0	1	1	0	3	0	1	0	1	0	d__Bacteria; p__Proteobacteria; c__Alphaproteobacteria; o__Rhizobiales; f__Beijerinckiaceae; g__Bosea; s__metagenome
OTU_2902	0	1	0	0	0	0	0	0	0	0	0	0	1	0	1	0	0	0	1	0	0	0	0	0	1	1	0	0	0	0	0	0	0	0	1	0	0	0	0	0	0	0	0	0	0	d__Bacteria
OTU_2903	41	28	14	41	69	18	26	42	21	76	61	96	22	15	10	0	0	0	4	1	3	2	1	0	5	4	4	0	0	0	0	0	0	4	0	0	0	0	0	0	0	0	0	0	0	d__Bacteria; p__Proteobacteria; c__Alphaproteobacteria; o__Azospirillales; f__Azospirillaceae; g__Skermanella; s__uncultured_bacterium
OTU_2904	3	1	0	0	0	1	0	1	1	2	0	0	2	0	0	0	0	0	0	0	0	0	0	0	0	0	0	0	0	0	0	0	0	0	0	0	0	0	0	0	0	0	0	0	0	d__Bacteria; p__Actinobacteria; c__0319_7L14; o__0319_7L14_or; f__0319_7L14_fa; g__0319_7L14_ge
OTU_2905	0	3	6	1	2	4	2	2	9	10	3	1	2	4	2	0	0	0	8	2	1	0	0	0	0	0	4	0	0	0	0	0	0	0	2	0	0	0	0	2	0	0	0	0	0	d__Bacteria; p__Acidobacteria; c__Subgroup_6; o__Subgroup_6_or; f__Subgroup_6_fa; g__Subgroup_6_ge
OTU_2906	0	0	0	0	0	0	0	0	0	0	0	0	0	0	0	0	0	0	0	0	0	0	0	0	0	0	0	0	0	0	0	0	1	0	7	1	0	9	1	1	0	0	0	0	0	Unclassified
OTU_2907	0	0	1	0	0	2	0	0	0	0	1	0	2	0	0	0	0	0	1	0	0	0	0	0	0	0	0	0	0	0	0	0	0	0	0	0	0	0	0	0	0	0	0	0	0	d__Bacteria; p__Proteobacteria; c__Gammaproteobacteria; o__Betaproteobacteriales; f__Burkholderiaceae
OTU_2908	2	4	4	12	2	2	5	6	6	9	5	7	7	2	1	0	0	0	20	1	1	2	0	0	0	2	2	0	0	0	1	0	0	0	0	0	2	0	0	0	0	0	0	0	0	d__Bacteria; p__Bacteroidetes; c__Bacteroidia; o__Chitinophagales; f__Chitinophagaceae
OTU_2909	0	0	0	0	0	0	0	0	0	0	0	0	0	0	0	0	0	0	0	0	0	0	0	0	0	0	0	0	0	0	0	0	0	2	0	0	1	0	0	5	1	0	58	3	5	d__Bacteria; p__Planctomycetes; c__Planctomycetacia; o__Isosphaerales; f__Isosphaeraceae; g__Singulisphaera
OTU_291	15	28	30	12	22	26	42	48	79	61	22	19	50	14	10	4	1	0	129	19	11	6	0	2	21	20	39	0	3	0	3	1	0	0	25	0	3	2	0	3	1	5	0	1	1	d__Bacteria; p__Chloroflexi; c__KD4_96; o__KD4_96_or; f__KD4_96_fa; g__KD4_96_ge; s__metagenome
OTU_2910	0	0	0	0	1	2	0	1	4	1	0	0	0	0	0	0	0	0	14	0	4	1	0	1	3	1	2	0	0	0	0	0	0	0	0	1	0	0	0	0	0	0	0	0	0	d__Bacteria; p__Proteobacteria; c__Alphaproteobacteria; o__Rhodobacterales; f__Rhodobacteraceae
OTU_2911	1	0	1	0	0	0	0	2	1	1	0	0	0	0	0	0	0	0	4	0	0	0	0	0	3	1	2	0	0	0	0	0	0	0	0	0	0	0	0	0	0	0	0	0	0	d__Bacteria; p__Proteobacteria; c__Alphaproteobacteria; o__Tistrellales; f__Geminicoccaceae; g__uncultured; s__uncultured_bacterium
OTU_2912	1	0	1	0	0	0	0	1	0	0	1	0	0	0	0	0	0	0	0	0	0	0	0	0	0	0	0	0	0	0	0	0	0	0	0	0	0	0	0	0	0	0	0	0	0	d__Bacteria
OTU_2913	0	0	0	0	0	0	0	1	0	1	0	0	0	0	0	0	0	0	1	0	0	0	0	0	0	0	0	0	0	0	0	0	0	0	0	0	0	0	0	0	0	0	0	0	0	d__Bacteria; p__Planctomycetes; c__Planctomycetacia; o__Planctomycetales; f__uncultured; g__uncultured_ge
OTU_2914	0	0	1	0	0	1	1	0	1	1	0	0	0	0	0	0	0	0	1	0	0	0	0	0	0	0	0	0	0	0	0	0	0	0	0	0	0	0	0	0	0	0	0	0	0	d__Bacteria; p__Planctomycetes; c__Phycisphaerae; o__Phycisphaerales; f__Phycisphaeraceae; g__AKYG587; s__uncultured_bacterium
OTU_2915	0	0	0	0	0	0	0	0	0	0	0	0	0	0	0	0	0	0	0	0	0	0	0	0	0	0	0	0	0	0	3	0	1	0	0	0	8	2	5	1	0	8	0	0	0	d__Bacteria; p__Planctomycetes; c__Planctomycetacia; o__Isosphaerales; f__Isosphaeraceae; g__uncultured
OTU_2916	0	0	0	0	0	0	0	0	0	0	0	0	0	0	0	0	0	0	0	0	0	0	0	0	0	0	0	0	0	0	0	0	0	0	0	0	2	1	0	0	0	0	0	0	0	d__Bacteria; p__Patescibacteria; c__Saccharimonadia; o__Saccharimonadales; f__Saccharimonadales_fa; g__Saccharimonadales_ge
OTU_2917	0	0	0	0	0	0	0	0	0	2	0	0	2	2	0	0	0	0	0	0	0	0	0	0	0	0	2	0	0	0	0	0	0	0	0	0	0	0	0	0	0	0	0	0	0	d__Bacteria; p__Armatimonadetes; c__Chthonomonadetes; o__Chthonomonadales; f__Chthonomonadales_fa; g__Chthonomonadales_ge; s__uncultured_bacterium
OTU_2918	0	1	0	0	1	2	1	0	4	0	0	1	0	0	1	0	0	0	0	0	0	0	0	0	0	0	0	0	0	0	0	0	0	0	0	0	0	0	0	0	0	0	0	0	0	d__Bacteria; p__Actinobacteria; c__Thermoleophilia; o__Gaiellales; f__uncultured; g__uncultured_ge; s__metagenome
OTU_2919	0	0	0	1	0	0	0	0	0	1	0	0	1	0	1	0	0	0	0	0	0	0	0	0	0	0	0	0	0	0	0	0	0	0	0	0	0	0	0	0	0	0	0	0	0	d__Bacteria; p__Proteobacteria; c__Alphaproteobacteria; o__Rhizobiales; f__Stappiaceae; g__Agaricicola; s__Agaricicola_taiwanensis
OTU_292	21	88	36	32	47	14	62	15	16	55	37	14	34	15	15	2	1	2	4	5	3	3	5	0	5	14	3	1	0	0	1	1	0	0	2	2	0	1	0	0	0	0	0	0	0	d__Bacteria; p__Proteobacteria; c__Alphaproteobacteria; o__Rhodobacterales; f__Rhodobacteraceae
OTU_2920	0	1	2	0	0	1	2	0	0	0	0	0	1	0	0	0	0	0	1	0	0	0	1	0	0	0	0	0	0	0	0	0	0	0	0	0	0	0	0	1	0	0	0	0	0	d__Bacteria; p__Firmicutes; c__Bacilli; o__Lactobacillales; f__Carnobacteriaceae; g__Atopostipes; s__uncultured_bacterium
OTU_2921	4	9	67	22	3	16	1	4	5	8	0	5	3	1	1	0	0	0	8	1	0	0	0	0	2	2	0	0	0	0	1	0	0	1	0	0	0	0	0	0	0	0	0	0	0	d__Bacteria; p__Proteobacteria; c__Alphaproteobacteria; o__Rhizobiales; f__Rhizobiaceae
OTU_2922	2	5	2	4	7	2	2	2	2	1	5	0	1	1	2	0	0	0	3	0	0	0	0	0	0	0	0	0	0	0	0	0	0	2	4	0	0	0	0	0	0	0	1	0	0	d__Bacteria; p__Actinobacteria; c__Actinobacteria; o__Propionibacteriales; f__Nocardioidaceae; g__Nocardioides
OTU_2923	0	1	0	0	0	0	1	0	1	1	0	0	0	0	0	0	0	0	1	0	0	0	0	0	0	0	0	0	0	0	0	0	0	0	0	0	0	0	0	0	0	0	0	0	0	d__Bacteria; p__Proteobacteria; c__Deltaproteobacteria; o__Myxococcales; f__Phaselicystidaceae; g__Phaselicystis; s__metagenome
OTU_2924	1	0	1	0	1	0	1	1	3	4	0	0	4	0	1	0	0	0	0	0	0	0	0	0	0	0	0	0	0	0	0	0	0	0	0	0	0	0	0	0	0	0	0	0	0	d__Bacteria; p__Proteobacteria; c__Alphaproteobacteria; o__Rhizobiales; f__uncultured; g__uncultured_ge; s__uncultured_forest_soil_bacterium
OTU_2925	0	0	2	0	0	0	0	0	1	0	0	0	0	0	0	0	0	0	0	1	0	0	0	0	0	0	0	0	0	0	0	0	0	0	0	0	0	0	0	0	0	0	0	0	0	d__Bacteria; p__Chloroflexi; c__Anaerolineae; o__SBR1031; f__A4b
OTU_2926	14	43	19	12	17	22	52	14	5	31	16	3	32	10	14	15	21	10	55	25	16	38	7	34	18	6	6	19	2	17	17	2	0	8	1	23	2	2	1	2	1	4	2	3	6	d__Bacteria; p__Proteobacteria; c__Alphaproteobacteria; o__Sphingomonadales; f__Sphingomonadaceae; g__Sphingomonas; s__Sphingomonas_faeni
OTU_2927	0	0	0	0	0	0	1	0	3	0	1	0	0	0	0	0	0	0	0	0	0	0	0	0	0	0	0	0	0	0	0	0	0	0	0	0	0	0	0	0	0	0	0	0	0	d__Bacteria
OTU_2928	1	1	2	23	16	1	2	7	6	4	4	8	6	1	0	0	0	11	3	2	20	1	4	0	2	1	4	0	1	0	0	0	0	7	0	0	2	2	0	1	0	0	1	1	0	d__Bacteria; p__Proteobacteria; c__Alphaproteobacteria; o__Tistrellales; f__Geminicoccaceae; g__Geminicoccus
OTU_2929	0	0	0	0	0	1	0	0	0	0	0	0	0	0	1	0	0	0	0	0	0	0	0	0	0	0	0	0	0	0	0	0	0	0	0	0	0	0	0	0	0	0	0	0	0	d__Bacteria; p__Proteobacteria; c__Deltaproteobacteria; o__Oligoflexales; f__0319_6G20; g__0319_6G20_ge
OTU_293	11	36	3	20	38	9	15	4	2	164	31	5	29	5	2	4	0	7	1	1	68	9	13	44	21	5	56	16	8	16	0	0	4	2	1	1	0	3	3	0	2	0	4	28	6	d__Bacteria; p__Bacteroidetes; c__Bacteroidia; o__Cytophagales; f__Hymenobacteraceae; g__Hymenobacter
OTU_2930	0	0	1	0	1	1	0	0	1	0	0	0	0	0	0	0	0	0	0	0	0	0	0	0	0	0	0	0	0	0	0	0	0	0	0	0	0	0	0	0	0	0	0	0	0	d__Bacteria; p__Proteobacteria; c__Alphaproteobacteria
OTU_2931	0	1	0	0	0	0	0	1	2	1	1	2	1	1	1	0	0	0	0	0	0	0	0	0	0	0	0	0	0	0	0	0	0	0	0	0	0	0	0	0	0	0	0	0	0	d__Bacteria; p__Bacteroidetes; c__Bacteroidia; o__Chitinophagales; f__Chitinophagaceae; g__uncultured
OTU_2932	0	0	0	1	0	0	1	0	3	0	4	0	0	1	0	0	0	0	0	0	0	0	0	0	0	0	0	0	0	0	0	0	0	0	0	0	0	0	0	0	0	0	0	0	0	d__Bacteria; p__Bacteroidetes; c__Bacteroidia; o__Cytophagales; f__Cytophagaceae; g__Cytophaga
OTU_2933	4	12	2	2	6	6	3	6	9	3	4	5	6	2	8	0	0	0	1	0	0	0	0	0	0	0	0	0	0	0	0	0	0	0	0	0	0	0	0	0	0	0	0	0	0	d__Bacteria; p__Acidobacteria; c__Holophagae; o__Subgroup_7; f__Subgroup_7_fa; g__Subgroup_7_ge; s__uncultured_Acidobacteria_bacterium
OTU_2934	0	5	3	3	1	1	2	2	10	4	2	1	1	4	2	2	0	1	95	11	10	7	2	2	22	3	8	0	3	0	3	2	0	0	22	1	0	0	0	2	2	1	0	0	0	d__Bacteria; p__Firmicutes; c__Bacilli; o__Bacillales; f__Bacillaceae; g__Bacillus; s__Bacillus_simplex
OTU_2935	0	0	0	1	3	0	1	0	1	1	1	0	0	0	1	0	0	0	3	0	0	0	0	0	0	0	0	0	0	0	0	0	0	0	0	0	0	0	0	0	0	0	0	0	0	d__Bacteria; p__Proteobacteria; c__Deltaproteobacteria; o__Desulfarculales; f__Desulfarculaceae; g__uncultured; s__metagenome
OTU_2936	1	0	0	0	0	0	0	0	1	0	0	2	1	0	0	0	0	0	0	0	0	0	0	0	0	0	0	0	0	0	0	0	0	0	0	0	0	0	0	0	0	0	0	0	0	d__Bacteria
OTU_2937	0	0	0	0	0	0	0	0	0	0	1	0	0	1	0	0	0	0	0	0	1	0	0	0	0	0	0	0	0	0	0	0	0	0	0	0	0	0	0	0	0	0	0	0	0	d__Bacteria; p__Actinobacteria; c__Actinobacteria
OTU_2938	0	0	0	0	2	0	0	0	0	0	0	0	0	0	0	0	0	0	0	0	0	0	0	0	0	0	0	0	0	0	0	0	0	0	0	0	0	0	0	0	0	0	0	0	0	d__Bacteria; p__Bacteroidetes; c__Bacteroidia; o__Cytophagales; f__Hymenobacteraceae; g__Pontibacter; s__uncultured_bacterium
OTU_2939	1	0	1	0	0	0	0	0	0	0	0	0	1	0	0	0	0	0	0	0	0	0	0	0	0	0	0	0	0	0	0	0	0	0	1	0	0	0	0	0	0	0	0	0	0	d__Bacteria; p__Planctomycetes; c__Pla3_lineage; o__Pla3_lineage_or; f__Pla3_lineage_fa; g__Pla3_lineage_ge
OTU_294	6	10	5	19	86	18	9	69	12	41	22	72	17	11	9	0	0	0	18	6	3	0	1	0	1	0	5	0	1	0	1	0	0	0	1	1	0	0	0	1	1	0	0	0	0	d__Bacteria; p__Bacteroidetes; c__Bacteroidia; o__Chitinophagales; f__Chitinophagaceae; g__Flavisolibacter; s__uncultured_bacterium
OTU_2940	0	0	2	0	0	1	0	0	0	0	0	0	1	0	0	0	0	0	0	0	0	0	0	0	0	0	0	0	0	0	0	0	0	0	0	0	0	0	0	0	0	0	0	0	0	d__Bacteria; p__Bacteroidetes; c__Bacteroidia; o__Sphingobacteriales; f__AKYH767; g__AKYH767_ge; s__uncultured_bacterium
OTU_2941	16	10	3	12	16	7	11	5	9	30	23	13	13	4	0	0	0	0	0	0	1	0	0	0	0	0	0	0	0	0	0	0	0	0	0	0	0	0	0	0	0	0	0	0	0	d__Bacteria; p__Proteobacteria; c__Alphaproteobacteria; o__Acetobacterales; f__Acetobacteraceae; g__Roseomonas
OTU_2942	0	0	0	0	0	0	0	0	0	0	0	1	1	0	0	0	0	0	0	0	0	0	0	0	0	0	0	0	0	0	0	0	0	0	0	0	0	0	0	0	0	0	0	0	0	d__Bacteria; p__Planctomycetes; c__Planctomycetacia; o__Gemmatales; f__Gemmataceae; g__uncultured; s__metagenome
OTU_2944	0	7	0	0	7	3	4	7	1	0	0	1	0	0	0	0	0	0	0	0	0	0	0	0	0	0	0	0	0	0	0	0	0	0	0	0	0	0	0	0	0	0	0	0	0	d__Bacteria; p__Bacteroidetes; c__Bacteroidia; o__Bacteroidales; f__Tannerellaceae; g__Parabacteroides; s__Parabacteroides_distasonis
OTU_2945	0	0	0	0	1	0	0	0	0	1	0	0	1	0	0	0	0	0	0	3	3	0	0	0	0	0	0	0	0	0	0	1	0	4	1	1	1	0	2	0	4	1	0	7	0	Unclassified
OTU_2948	0	0	0	0	0	0	0	1	0	0	0	0	0	0	0	0	0	1	0	0	0	0	0	0	0	0	0	0	0	0	0	0	0	0	0	0	0	0	0	0	14	0	0	0	0	d__Bacteria; p__Proteobacteria
OTU_2949	0	0	0	0	0	1	0	0	0	0	1	0	2	0	0	0	0	0	0	0	0	0	0	0	0	0	0	0	0	0	0	0	0	1	0	1	0	0	0	0	0	0	0	0	0	d__Bacteria; p__Chloroflexi
OTU_295	0	0	0	0	0	0	0	0	0	0	0	0	0	0	0	0	0	0	0	1	0	0	0	0	0	0	0	0	0	0	103	81	147	202	61	20	234	136	29	32	283	190	7	3	31	d__Bacteria; p__Planctomycetes; c__Planctomycetacia; o__Isosphaerales; f__Isosphaeraceae
OTU_2951	0	0	0	0	0	0	0	1	1	0	0	1	0	0	1	0	0	0	1	0	0	0	0	0	0	0	1	0	0	0	0	0	0	0	0	0	0	0	0	0	0	0	0	0	0	d__Bacteria; p__Bacteroidetes; c__Rhodothermia; o__Rhodothermales; f__Rhodothermaceae; g__Rhodothermaceae_ge; s__metagenome
OTU_2956	0	0	1	0	0	0	0	0	1	0	0	1	0	0	0	0	0	0	0	0	0	0	0	0	0	0	0	0	0	0	0	0	0	0	0	0	0	0	0	0	0	0	0	0	0	d__Bacteria; p__FBP; c__FBP_cl; o__FBP_or; f__FBP_fa; g__FBP_ge; s__uncultured_bacterium
OTU_2957	0	0	0	0	1	0	1	1	0	0	0	0	0	0	0	0	0	0	0	0	0	0	0	0	0	0	0	0	0	0	0	0	0	0	0	0	0	0	0	0	0	0	0	0	0	d__Bacteria; p__Planctomycetes; c__Phycisphaerae; o__Phycisphaerales; f__Phycisphaeraceae; g__AKYG587; s__uncultured_bacterium
OTU_2959	0	0	0	0	0	0	0	0	0	0	0	0	0	0	0	0	0	0	0	0	0	0	0	0	0	0	0	0	0	0	0	0	0	0	0	0	0	0	0	0	6	0	0	0	1	d__Bacteria
OTU_296	14	10	4	12	58	18	19	3	3	10	18	3	16	13	5	4	1	13	2	7	45	17	177	4	5	14	5	20	12	18	1	1	0	0	0	2	0	0	0	8	6	1	0	3	0	d__Bacteria; p__Proteobacteria; c__Alphaproteobacteria; o__Acetobacterales; f__Acetobacteraceae; g__Roseomonas
OTU_2960	2	0	1	0	1	0	0	0	4	2	1	1	2	1	0	0	0	0	1	6	10	0	0	1	4	0	3	0	2	0	0	0	1	10	9	0	0	0	0	0	0	0	0	0	0	d__Bacteria; p__Actinobacteria; c__Actinobacteria; o__Micrococcales; f__Intrasporangiaceae
OTU_2961	0	0	0	0	1	0	0	1	1	0	1	1	1	0	0	0	0	0	0	0	0	0	0	0	0	0	0	0	0	0	0	0	0	0	0	0	0	0	0	0	0	0	0	0	0	d__Bacteria; p__Chloroflexi; c__Chloroflexia; o__Chloroflexales; f__Chloroflexaceae; g__Chloronema; s__uncultured_bacterium
OTU_2962	0	0	0	0	0	0	0	0	0	0	0	0	0	2	0	0	1	0	1	0	0	3	1	1	0	0	0	0	0	0	0	2	0	0	0	0	0	1	0	1	0	1	0	0	0	d__Bacteria; p__Proteobacteria; c__Gammaproteobacteria; o__Legionellales; f__Legionellaceae; g__Legionella
OTU_2963	0	11	4	3	3	1	8	4	6	4	2	0	4	2	2	0	0	0	11	1	0	0	0	0	1	0	1	0	0	0	0	0	0	0	0	0	0	0	0	0	0	0	0	0	0	d__Bacteria; p__Actinobacteria; c__Thermoleophilia; o__Solirubrobacterales; f__67_14; g__67_14_ge; s__uncultured_bacterium
OTU_2964	0	0	1	0	0	0	1	0	0	0	0	0	0	0	0	0	0	0	1	0	0	0	0	0	0	0	0	0	0	0	0	0	0	0	0	0	0	0	0	0	0	0	0	0	0	d__Bacteria; p__Gemmatimonadetes; c__Gemmatimonadetes; o__Gemmatimonadales; f__Gemmatimonadaceae; g__uncultured
OTU_2965	0	0	0	0	0	0	0	0	0	0	0	0	0	0	0	0	0	0	0	0	0	0	0	0	0	0	0	0	0	0	13	4	1	10	7	1	0	5	11	0	29	3	0	1	2	d__Bacteria; p__Patescibacteria; c__Saccharimonadia; o__Saccharimonadales; f__Saccharimonadales_fa; g__Saccharimonadales_ge
OTU_2966	0	0	1	0	0	0	0	0	1	3	1	0	0	0	0	0	0	0	0	0	0	0	0	0	0	0	0	0	0	0	0	0	0	0	0	0	0	0	0	0	0	0	0	0	0	d__Bacteria; p__Planctomycetes; c__Phycisphaerae; o__Tepidisphaerales; f__WD2101_soil_group; g__WD2101_soil_group_ge; s__uncultured_bacterium
OTU_2967	1	0	0	0	0	2	0	0	0	0	0	0	0	0	0	1	0	0	0	0	1	1	0	3	0	0	0	0	1	0	0	1	0	0	0	0	0	0	0	0	0	0	1	0	0	d__Bacteria; p__Proteobacteria; c__Gammaproteobacteria; o__Gammaproteobacteria_Incertae_Sedis; f__Unknown_Family; g__Unknown_Family_ge; s__uncultured_soil_bacterium
OTU_2968	0	0	0	0	0	0	0	0	0	0	0	0	0	0	0	0	0	0	0	0	0	0	0	0	0	0	0	0	0	0	7	7	0	1	0	0	0	0	0	0	5	3	0	0	0	d__Bacteria; p__Actinobacteria; c__Thermoleophilia; o__Solirubrobacterales; f__Solirubrobacteraceae
OTU_2969	0	0	0	1	0	0	0	0	0	0	0	0	0	1	0	0	0	0	0	0	0	0	0	0	0	0	0	0	0	0	0	0	0	0	0	0	0	0	0	0	0	0	0	0	0	d__Bacteria; p__Planctomycetes; c__OM190; o__OM190_or; f__OM190_fa; g__OM190_ge
OTU_297	0	1	0	0	0	0	1	0	2	0	0	0	0	0	0	0	0	1	0	0	0	1	0	0	0	0	0	0	0	0	339	332	122	49	20	47	87	72	77	63	160	117	23	8	14	d__Bacteria; p__Actinobacteria; c__Actinobacteria; o__Frankiales; f__Frankiaceae; g__Jatrophihabitans
OTU_2970	0	0	0	0	0	0	0	0	0	0	0	0	0	0	0	0	0	10	0	0	3	1	0	0	0	0	0	0	0	0	1	7	0	1	0	4	5	3	0	8	0	1	4	0	0	d__Bacteria; p__Actinobacteria; c__Actinobacteria; o__Propionibacteriales; f__Propionibacteriaceae; g__Microlunatus
OTU_2971	0	0	0	0	0	0	0	0	0	0	0	0	0	0	0	0	0	0	0	0	0	0	0	0	0	0	0	0	0	0	0	0	0	0	0	0	0	0	11	0	0	0	0	0	4	d__Bacteria
OTU_2972	0	0	2	0	1	0	0	0	2	0	0	1	0	0	0	0	0	0	1	0	0	0	0	0	0	0	0	0	0	0	0	0	0	0	0	0	0	0	0	0	0	0	0	0	0	d__Bacteria; p__Armatimonadetes; c__uncultured; o__uncultured_or; f__uncultured_fa; g__uncultured_ge; s__uncultured_actinobacterium
OTU_2975	0	0	0	1	2	0	1	2	0	0	0	0	2	0	0	0	0	0	0	0	0	0	0	0	0	0	0	0	0	0	0	0	0	0	0	0	0	0	0	0	0	0	0	0	0	d__Bacteria; p__Chloroflexi; c__Chloroflexia; o__Kallotenuales; f__AKIW781; g__AKIW781_ge; s__uncultured_soil_bacterium
OTU_2976	0	0	0	1	2	4	0	0	1	1	11	1	0	1	0	1	0	40	0	0	57	8	0	0	6	0	2	0	5	5	0	3	0	2	0	0	11	8	0	1	1	0	2	3	2	d__Bacteria; p__Bacteroidetes; c__Bacteroidia; o__Chitinophagales; f__Chitinophagaceae
OTU_2977	0	0	0	0	0	0	0	0	0	0	0	0	1	0	0	0	0	0	5	0	0	0	1	0	2	0	1	0	0	0	0	0	0	1	4	0	0	0	0	0	0	0	0	0	0	d__Bacteria; p__Firmicutes; c__Bacilli; o__Bacillales; f__Bacillaceae; g__Bacillus
OTU_2978	0	0	6	0	0	2	0	0	0	0	0	0	0	0	0	0	0	0	0	0	0	0	0	0	0	0	0	0	0	0	0	0	0	0	0	0	0	0	0	0	0	0	0	0	0	d__Bacteria; p__Proteobacteria; c__Gammaproteobacteria; o__Betaproteobacteriales; f__Burkholderiaceae; g__Sutterella
OTU_2979	0	1	0	1	0	1	0	0	3	1	0	0	2	0	1	0	0	0	0	0	0	0	0	0	0	0	0	0	0	0	0	0	0	0	0	0	0	0	0	0	1	0	0	0	0	d__Bacteria; p__Chloroflexi; c__Anaerolineae; o__SBR1031; f__SBR1031_fa; g__SBR1031_ge; s__uncultured_Chloroflexi_bacterium
OTU_298	17	12	25	3	5	12	25	9	43	30	13	15	0	2	4	0	0	0	12	0	0	0	0	0	0	0	1	0	0	0	0	0	0	0	1	0	0	0	0	0	1	0	0	0	0	d__Bacteria; p__Proteobacteria; c__Gammaproteobacteria; o__Xanthomonadales; f__Xanthomonadaceae; g__Lysobacter
OTU_2981	0	0	1	0	0	0	1	3	0	0	0	0	2	0	0	0	0	0	0	0	0	0	0	0	0	0	0	0	0	0	0	0	0	0	0	0	0	0	0	0	0	0	0	0	1	d__Bacteria; p__Chloroflexi; c__Chloroflexia; o__Chloroflexales; f__Roseiflexaceae; g__uncultured; s__uncultured_Chloroflexi_bacterium
OTU_2983	0	0	0	1	0	0	0	0	0	0	0	0	0	0	0	0	0	13	0	0	1	0	0	0	0	0	0	0	0	0	0	0	0	0	0	0	1	2	0	1	5	0	2	0	0	d__Bacteria; p__Verrucomicrobia; c__Verrucomicrobiae; o__Chthoniobacterales; f__Chthoniobacteraceae; g__Chthoniobacter; s__metagenome
OTU_2984	2	0	2	0	1	2	1	2	0	2	1	2	1	0	1	0	0	1	1	1	0	0	0	0	1	0	0	0	0	0	1	3	0	2	0	0	1	1	0	6	3	0	6	0	1	d__Bacteria; p__Actinobacteria; c__Thermoleophilia; o__Solirubrobacterales; f__Solirubrobacteraceae; g__Solirubrobacter
OTU_2985	0	0	3	0	0	2	1	1	0	0	0	0	0	0	0	1	0	0	8	4	0	0	0	0	2	0	0	0	0	1	0	0	0	0	0	0	0	0	0	0	0	0	0	0	0	d__Bacteria; p__Acidobacteria; c__Holophagae; o__Subgroup_7; f__Subgroup_7_fa; g__Subgroup_7_ge
OTU_2986	1	0	2	1	1	0	4	2	2	2	1	3	2	0	0	0	0	0	0	0	0	0	0	0	0	0	0	0	0	0	0	0	0	0	0	0	0	0	0	0	0	0	0	0	0	d__Bacteria; p__Actinobacteria; c__Actinobacteria; o__Micromonosporales; f__Micromonosporaceae
OTU_2987	0	0	0	0	0	0	0	0	0	0	0	0	0	0	0	0	0	0	0	0	0	0	0	0	0	0	0	0	0	0	0	1	0	1	4	1	1	1	0	0	3	1	0	0	1	Unclassified
OTU_2988	0	0	0	0	0	0	0	0	0	0	0	0	0	0	0	0	0	0	0	1	0	0	0	0	0	0	0	0	0	0	0	0	0	1	0	0	1	1	0	1	0	0	0	0	0	d__Bacteria; p__Actinobacteria; c__Actinobacteria; o__Corynebacteriales; f__Corynebacteriaceae; g__Lawsonella
OTU_2989	0	0	0	0	0	0	0	0	0	0	0	0	0	0	0	0	0	0	7	0	0	0	0	0	0	0	0	0	0	0	0	0	0	0	0	0	0	0	0	0	0	0	0	0	0	d__Bacteria; p__Proteobacteria; c__Gammaproteobacteria; o__Xanthomonadales; f__Xanthomonadaceae; g__Lysobacter
OTU_299	14	22	1	15	43	11	3	6	9	22	3	7	27	21	4	9	46	68	3	4	209	164	26	14	10	74	59	54	61	56	2	10	0	4	0	5	10	6	6	6	12	2	54	180	124	d__Bacteria; p__Armatimonadetes; c__Armatimonadia; o__Armatimonadales; f__Armatimonadales_fa; g__Armatimonadales_ge
OTU_2990	0	0	0	0	0	0	0	0	0	0	0	0	0	0	0	0	0	0	0	0	0	0	0	0	0	2	0	0	0	0	0	0	0	0	1	0	0	0	0	0	0	0	0	0	0	d__Bacteria; p__Actinobacteria; c__Thermoleophilia; o__Gaiellales; f__uncultured; g__uncultured_ge
OTU_2991	0	0	0	0	0	0	0	0	0	1	0	0	0	0	0	0	0	0	0	0	0	0	0	0	0	1	0	0	0	0	0	0	0	2	0	0	0	0	0	0	0	0	0	0	0	d__Bacteria; p__Chlamydiae; c__Chlamydiae; o__Chlamydiales; f__Simkaniaceae; g__uncultured; s__metagenome
OTU_2992	0	0	0	0	0	0	0	0	0	0	0	0	0	0	0	0	0	0	0	2	0	0	1	0	8	0	0	0	0	0	0	0	0	0	0	0	0	0	0	0	0	0	0	0	0	Unclassified
OTU_2994	0	1	1	1	0	0	0	1	0	0	0	0	0	0	0	0	0	0	0	0	0	0	0	0	1	3	0	0	0	0	0	0	0	0	0	0	0	0	0	0	0	0	0	0	0	d__Bacteria; p__Actinobacteria; c__0319_7L14; o__0319_7L14_or; f__0319_7L14_fa; g__0319_7L14_ge; s__uncultured_bacterium
OTU_2995	0	1	0	0	0	2	0	0	0	1	0	0	0	0	0	0	0	0	0	0	0	0	0	0	0	0	0	0	0	0	1	0	0	0	0	0	0	0	0	0	0	0	0	0	0	d__Bacteria; p__Armatimonadetes; c__Fimbriimonadia; o__Fimbriimonadales; f__Fimbriimonadaceae; g__Fimbriimonadaceae_ge
OTU_2996	0	1	1	3	0	0	2	0	1	0	0	0	0	0	2	0	0	0	0	0	0	0	0	0	0	0	0	0	0	0	0	0	0	0	0	0	0	0	0	0	1	0	0	0	0	d__Bacteria; p__Proteobacteria; c__Deltaproteobacteria; o__Bdellovibrionales; f__Bacteriovoracaceae; g__Peredibacter; s__metagenome
OTU_2997	0	0	0	0	0	0	0	0	0	0	0	0	1	0	0	0	1	0	0	0	0	0	0	0	0	0	3	0	0	0	0	0	0	0	1	0	0	16	2	0	0	0	2	0	0	Unclassified
OTU_2998	0	0	0	0	0	0	0	0	0	0	0	0	0	0	0	0	0	0	0	0	0	0	0	0	0	0	0	0	0	0	0	0	0	0	0	0	0	0	0	0	0	0	0	3	5	d__Bacteria; p__Proteobacteria; c__Deltaproteobacteria; o__Oligoflexales; f__0319_6G20; g__0319_6G20_ge; s__uncultured_proteobacterium
OTU_2999	0	1	0	0	0	0	0	0	0	0	0	0	0	0	0	0	0	0	0	0	1	1	1	0	0	0	0	0	0	0	0	0	0	0	0	0	0	2	0	0	0	0	0	0	0	Unclassified
OTU_30	908	1374	805	279	661	440	1045	97	152	1227	491	153	477	498	174	617	584	391	99	545	236	100	30	199	198	188	156	216	74	246	148	107	58	210	105	248	104	107	51	197	1079	258	37	66	105	d__Bacteria; p__Actinobacteria; c__Actinobacteria; o__Micrococcales; f__Microbacteriaceae; g__Marisediminicola; s__uncultured_bacterium
OTU_300	4	6	7	11	5	17	23	38	28	16	6	3	17	7	1	0	1	0	11	6	1	0	1	2	4	2	6	0	0	0	0	0	0	0	0	0	0	1	0	0	0	0	0	0	1	d__Bacteria; p__Verrucomicrobia; c__Verrucomicrobiae; o__Chthoniobacterales; f__Chthoniobacteraceae; g__Candidatus_Udaeobacter
OTU_3000	0	0	0	0	0	1	0	1	3	0	1	0	1	0	0	0	0	0	2	0	0	0	0	0	0	0	0	0	0	0	0	0	0	0	0	0	0	0	0	0	0	0	0	0	0	d__Bacteria; p__Proteobacteria; c__Deltaproteobacteria; o__Myxococcales; f__Haliangiaceae; g__Haliangium
OTU_3001	0	1	1	2	0	1	1	0	3	0	0	0	1	0	0	0	0	0	0	0	0	1	0	0	0	0	0	0	0	0	0	0	0	0	0	0	0	0	0	0	0	0	0	0	0	d__Bacteria; p__Proteobacteria; c__Alphaproteobacteria; o__Elsterales; f__uncultured; g__uncultured_ge
OTU_3002	0	0	0	0	0	0	1	0	2	0	0	0	0	0	0	0	0	0	0	0	0	0	0	0	0	0	0	0	0	0	0	0	0	0	0	0	0	0	0	0	0	0	0	0	0	d__Bacteria; p__Actinobacteria
OTU_3003	0	0	0	0	0	0	1	0	1	0	0	0	0	0	0	0	0	0	0	0	0	0	0	0	0	0	0	0	0	0	0	0	0	0	0	0	0	0	0	0	1	0	0	0	0	d__Bacteria; p__Proteobacteria; c__Deltaproteobacteria
OTU_3004	0	0	0	0	1	0	0	1	1	0	0	1	0	0	0	0	0	0	0	0	0	0	0	0	0	0	0	0	0	0	0	0	0	0	0	0	0	0	0	0	0	0	0	0	0	d__Bacteria; p__Proteobacteria; c__Deltaproteobacteria; o__Myxococcales; f__Haliangiaceae; g__Haliangium
OTU_3005	0	0	0	0	0	0	0	0	0	0	0	0	0	0	0	0	0	0	0	0	0	0	0	0	0	0	0	0	0	0	0	0	0	13	0	0	0	0	0	0	0	0	0	0	0	d__Bacteria; p__Proteobacteria; c__Gammaproteobacteria; o__Orbales; f__Orbaceae; g__Gilliamella
OTU_3006	0	1	0	2	0	1	2	2	3	1	0	0	4	0	0	0	0	0	0	0	0	0	0	0	0	0	0	0	0	0	0	0	0	0	0	0	0	0	0	0	0	0	0	0	0	d__Bacteria; p__Elusimicrobia; c__Lineage_IIb; o__Lineage_IIb_or; f__Lineage_IIb_fa; g__Lineage_IIb_ge; s__uncultured_soil_bacterium
OTU_3007	1	1	0	0	0	0	1	1	3	3	0	0	1	0	0	0	0	0	0	0	0	0	0	0	0	0	0	0	0	0	0	0	0	0	0	0	0	0	0	0	0	0	0	0	0	d__Bacteria; p__Verrucomicrobia; c__Verrucomicrobiae; o__Pedosphaerales; f__Pedosphaeraceae; g__Pedosphaeraceae_ge
OTU_3008	0	1	0	1	0	0	0	0	0	0	0	0	0	0	0	0	0	0	0	0	0	0	0	0	0	0	0	0	0	0	0	0	0	0	0	0	0	0	0	0	0	0	0	0	0	d__Bacteria
OTU_3009	0	0	0	0	0	0	1	1	1	0	0	0	0	0	0	0	0	0	0	0	0	0	0	0	0	0	0	0	0	0	0	0	0	0	0	0	0	0	0	0	0	0	0	0	0	d__Bacteria; p__Proteobacteria; c__Alphaproteobacteria
OTU_301	4	3	4	3	9	4	2	2	1	14	7	3	8	8	50	0	1	1	2	2	2	0	2	0	0	1	0	0	0	0	0	0	1	0	0	0	0	0	0	3	4	0	1	0	0	d__Bacteria; p__Proteobacteria; c__Alphaproteobacteria; o__Rhizobiales; f__Beijerinckiaceae; g__Methylobacterium
OTU_3010	0	1	0	1	1	0	0	1	0	0	0	0	0	0	0	0	0	0	0	0	0	0	0	0	0	0	0	0	0	0	0	0	0	0	0	0	0	0	0	0	0	0	0	0	0	d__Bacteria; p__Planctomycetes; c__Phycisphaerae; o__Tepidisphaerales; f__Tepidisphaeraceae; g__Tepidisphaera
OTU_3011	0	0	0	0	0	0	0	0	2	0	0	0	0	0	0	0	0	0	0	0	0	0	0	0	0	0	0	0	0	0	0	0	0	0	0	0	0	0	0	0	0	0	0	0	0	d__Bacteria
OTU_3012	0	0	0	0	0	0	0	0	0	0	0	0	0	0	0	0	0	0	3	0	0	0	0	0	0	0	0	0	0	0	0	0	0	9	0	0	0	0	0	0	0	0	0	0	0	Unclassified
OTU_3013	0	0	0	0	0	0	0	0	0	0	1	0	0	1	0	0	0	0	0	0	0	0	0	0	0	0	0	0	0	0	0	0	0	0	0	0	0	0	0	0	0	0	0	0	0	d__Bacteria; p__Patescibacteria
OTU_3014	0	0	0	0	3	0	0	0	0	0	0	0	0	0	0	0	0	0	0	0	0	0	0	0	0	0	0	0	0	0	0	0	0	0	0	0	0	0	0	0	0	0	0	0	0	d__Bacteria; p__Firmicutes; c__Clostridia; o__Clostridiales; f__Ruminococcaceae; g__Ruminococcaceae_ge; s__gut_metagenome
OTU_3015	0	1	0	0	1	0	1	0	1	0	0	0	0	0	0	0	0	0	0	0	1	0	0	0	5	0	3	0	4	4	0	0	0	0	0	0	0	0	0	0	0	0	0	0	0	d__Bacteria; p__Proteobacteria; c__Alphaproteobacteria; o__Acetobacterales; f__Acetobacteraceae
OTU_3016	0	2	1	0	0	0	2	4	3	0	1	0	2	1	1	0	0	0	6	1	0	0	0	0	0	0	0	0	0	0	0	0	0	0	0	0	0	0	0	0	0	0	0	0	0	d__Bacteria; p__Actinobacteria; c__Thermoleophilia; o__Solirubrobacterales; f__67_14; g__67_14_ge
OTU_3017	0	0	0	0	0	0	0	0	1	1	0	0	0	0	0	0	0	0	5	0	0	0	1	0	0	0	0	0	0	0	0	0	0	0	0	0	0	0	0	0	0	0	0	0	0	d__Bacteria; p__Actinobacteria; c__Acidimicrobiia; o__Microtrichales
OTU_3018	1	0	0	0	0	0	0	1	0	0	0	1	0	0	0	0	0	0	1	0	0	0	0	0	0	0	0	0	0	0	0	0	0	0	0	0	0	0	0	0	0	0	0	0	0	d__Bacteria; p__Actinobacteria; c__Acidimicrobiia
OTU_3019	0	0	0	0	0	0	1	0	0	0	0	0	0	0	0	0	0	0	0	0	0	1	0	0	0	0	0	0	0	0	0	0	0	0	0	0	0	0	0	0	0	0	0	0	0	d__Bacteria; p__Firmicutes; c__Clostridia; o__Clostridiales; f__Ruminococcaceae; g__Ruminiclostridium_1
OTU_302	16	35	25	7	18	31	39	50	69	35	28	16	24	22	10	1	0	0	10	2	1	1	0	0	2	0	0	0	0	0	1	0	0	0	3	0	0	0	0	0	0	0	0	0	0	d__Bacteria; p__Actinobacteria; c__Acidimicrobiia
OTU_3020	2	2	0	1	1	0	5	0	2	4	1	0	2	0	0	0	0	0	5	0	1	0	0	0	0	0	0	0	0	0	0	0	0	0	1	0	0	0	0	0	0	0	0	2	0	d__Bacteria; p__Proteobacteria; c__Deltaproteobacteria; o__Myxococcales; f__Polyangiaceae; g__uncultured
OTU_3021	4	3	0	1	1	0	3	1	1	3	2	0	0	0	2	0	0	0	0	0	0	0	0	0	0	0	0	0	0	0	0	0	0	0	0	0	0	0	0	0	0	0	0	0	0	d__Bacteria; p__Proteobacteria; c__Deltaproteobacteria; o__Myxococcales; f__Polyangiaceae; g__Pajaroellobacter; s__uncultured_bacterium
OTU_3022	0	0	0	0	0	0	0	0	0	0	0	0	0	0	0	1	0	0	0	0	0	1	0	0	0	0	1	0	0	0	0	0	0	0	0	0	0	0	2	0	3	0	0	0	0	d__Bacteria; p__Proteobacteria; c__Gammaproteobacteria; o__Gammaproteobacteria_Incertae_Sedis; f__Unknown_Family
OTU_3023	19	46	22	10	13	38	30	20	43	55	10	28	47	27	18	36	3	42	64	2	18	17	0	6	12	5	10	8	6	2572	7	2	0	27	80	51	5	9	6	58	16	24	7	9	3	d__Bacteria; p__Actinobacteria; c__Actinobacteria; o__Micrococcales; f__Microbacteriaceae; g__Microbacterium
OTU_3024	0	2	3	0	0	0	0	1	0	0	0	0	0	2	0	1	0	0	4	1	0	2	0	1	3	3	1	0	0	0	0	0	0	0	1	0	0	0	0	0	2	0	0	0	0	d__Bacteria; p__Firmicutes; c__Bacilli; o__Bacillales; f__Planococcaceae
OTU_3025	0	0	0	0	0	0	2	1	0	0	0	0	1	1	0	0	0	0	0	0	0	0	0	0	0	0	0	0	0	0	0	0	0	0	0	0	0	0	0	0	0	0	0	0	0	d__Bacteria; p__Proteobacteria; c__Deltaproteobacteria; o__Myxococcales; f__Blfdi19; g__Blfdi19_ge
OTU_3026	0	0	1	0	0	0	0	0	0	0	0	0	0	0	0	0	0	0	0	0	0	0	0	0	0	1	0	0	0	0	0	0	0	0	0	0	0	0	0	1	0	0	0	0	0	d__Bacteria; p__Actinobacteria; c__Actinobacteria; o__Corynebacteriales; f__Corynebacteriaceae; g__Corynebacterium_1; s__Corynebacterium_lipophiloflavum
OTU_3027	0	0	0	0	0	0	0	0	0	0	0	0	0	0	0	0	0	0	0	0	0	0	0	0	0	0	0	0	0	0	0	0	0	0	0	0	4	4	0	1	0	0	0	0	0	d__Bacteria; p__Gemmatimonadetes; c__Gemmatimonadetes; o__Gemmatimonadales; f__Gemmatimonadaceae; g__Gemmatirosa; s__uncultured_Gemmatimonadetes_bacterium
OTU_3028	0	0	0	0	0	0	0	0	0	0	0	0	0	0	0	0	0	3	0	0	0	0	0	0	1	0	0	0	0	0	1	0	0	0	0	0	0	0	1	0	3	0	2	0	10	d__Bacteria; p__Planctomycetes; c__Phycisphaerae; o__Tepidisphaerales; f__Tepidisphaeraceae; g__Tepidisphaera
OTU_3029	2	1	1	1	0	0	2	2	3	2	1	0	2	1	1	0	0	0	1	0	0	0	0	0	0	0	0	0	0	0	1	0	0	0	0	0	1	0	0	0	0	0	0	0	0	d__Bacteria; p__Proteobacteria; c__Gammaproteobacteria; o__Gammaproteobacteria_Incertae_Sedis; f__Unknown_Family; g__Acidibacter
OTU_3030	0	0	0	0	0	0	0	0	0	0	0	0	0	0	0	0	0	0	0	0	0	0	0	0	0	0	0	0	0	0	3	2	7	1	2	0	0	0	0	1	0	1	0	0	0	d__Bacteria
OTU_3031	0	0	0	0	0	0	0	0	0	0	0	0	0	0	0	0	0	0	0	0	0	0	0	0	0	0	0	0	0	0	0	0	0	0	0	0	1	0	1	0	1	0	0	6	0	d__Bacteria; p__Chlamydiae; c__Chlamydiae; o__Chlamydiales; f__Parachlamydiaceae
OTU_3032	0	3	1	0	0	0	1	0	0	0	2	1	0	0	0	0	1	0	0	0	0	2	0	0	0	0	0	0	0	0	0	0	0	0	0	0	0	1	0	3	0	0	0	0	0	d__Bacteria; p__Firmicutes; c__Bacilli; o__Lactobacillales; f__Carnobacteriaceae
OTU_3035	0	0	0	0	0	0	0	0	1	0	1	0	0	2	0	0	0	0	0	0	0	0	0	0	0	0	0	0	0	0	0	0	0	0	0	0	0	0	0	0	0	0	0	0	0	d__Bacteria; p__Proteobacteria; c__Gammaproteobacteria; o__Methylococcales; f__Methylococcaceae; g__uncultured
OTU_3037	2	0	1	0	0	0	0	0	0	2	1	1	0	0	0	0	0	0	0	0	0	0	0	0	0	0	0	0	0	0	0	0	0	0	0	0	0	0	0	0	0	0	0	0	0	d__Bacteria; p__Proteobacteria; c__Deltaproteobacteria; o__Myxococcales; f__Sandaracinaceae
OTU_3038	2	11	7	0	5	8	12	10	7	7	5	4	3	2	4	0	0	0	3	0	0	0	0	0	1	0	1	0	1	1	0	0	0	0	0	0	0	0	0	0	0	0	0	0	0	d__Bacteria; p__Actinobacteria; c__Actinobacteria; o__Micrococcales
OTU_3039	1	0	0	0	0	0	0	1	1	0	0	0	0	0	0	0	0	0	0	0	0	0	0	0	0	0	0	0	0	0	0	0	0	0	0	0	0	0	0	0	0	0	0	0	0	d__Bacteria; p__Chloroflexi; c__OLB14; o__OLB14_or; f__OLB14_fa; g__OLB14_ge
OTU_304	0	0	0	2	0	0	0	0	0	0	0	0	3	1	0	7	13	1	1	0	4	0	0	0	0	0	4	1	0	0	55	202	16	92	28	47	140	110	30	154	209	69	6	13	10	d__Bacteria; p__Proteobacteria; c__Deltaproteobacteria; o__Bdellovibrionales; f__Bdellovibrionaceae; g__Bdellovibrio
OTU_3041	0	1	0	0	0	0	0	2	4	0	0	0	0	0	0	0	0	0	0	0	0	0	0	0	0	0	0	0	0	0	0	0	0	0	0	0	0	0	0	0	0	0	0	0	0	d__Bacteria; p__Planctomycetes; c__Planctomycetacia; o__Gemmatales; f__Gemmataceae; g__uncultured
OTU_3042	1	2	0	0	0	0	0	1	1	0	0	0	0	0	0	0	0	0	0	0	0	0	0	0	0	0	1	0	0	0	0	0	0	0	0	0	0	0	0	0	0	0	0	0	0	d__Bacteria; p__Bacteroidetes; c__Bacteroidia; o__Chitinophagales; f__Chitinophagaceae
OTU_3043	0	0	0	0	0	1	0	0	0	0	2	0	0	0	0	0	0	0	0	0	0	0	0	0	0	0	0	0	0	0	0	0	0	0	0	0	0	0	0	0	0	0	0	0	0	d__Bacteria; p__Bacteroidetes; c__Bacteroidia; o__Sphingobacteriales; f__env.OPS_17; g__env.OPS_17_ge
OTU_3044	0	0	1	0	0	1	0	0	0	0	0	0	0	0	0	0	0	0	0	0	0	0	0	0	0	0	0	0	0	0	0	0	0	0	0	0	0	0	0	0	0	0	0	0	0	d__Bacteria; p__Planctomycetes; c__Phycisphaerae; o__S_70; f__S_70_fa; g__S_70_ge
OTU_3045	0	2	0	0	1	0	0	0	0	0	0	0	0	0	0	0	0	0	0	0	0	0	0	0	0	0	0	0	0	0	0	0	0	0	0	0	0	0	0	0	0	0	0	0	0	d__Bacteria; p__Bacteroidetes; c__Bacteroidia; o__Bacteroidales; f__Bacteroidaceae; g__Bacteroides
OTU_3046	0	0	0	0	0	0	0	0	0	0	0	0	3	0	0	0	0	0	0	0	0	0	0	0	0	0	0	0	0	0	0	0	0	0	0	0	0	0	0	0	0	0	0	0	0	d__Bacteria
OTU_3047	0	0	0	0	0	0	0	1	0	0	1	0	0	0	0	0	0	0	9	0	1	0	0	0	0	0	0	0	2	0	0	0	0	0	1	0	0	0	0	0	0	0	0	0	0	d__Bacteria; p__Actinobacteria; c__Actinobacteria; o__Streptosporangiales; f__Thermomonosporaceae; g__Actinocorallia; s__metagenome
OTU_3048	0	0	1	0	0	0	2	1	1	1	0	1	2	1	0	0	0	0	0	0	0	0	0	0	0	0	0	0	0	0	0	0	0	0	0	0	0	0	0	0	0	0	0	0	0	d__Bacteria; p__Verrucomicrobia; c__Verrucomicrobiae; o__Chthoniobacterales; f__Chthoniobacteraceae; g__Chthoniobacter
OTU_3049	0	0	0	0	0	0	0	0	0	0	0	0	0	0	0	0	0	0	0	0	0	0	0	0	0	0	0	0	0	0	0	0	0	0	0	0	0	0	0	3	0	0	2	0	0	d__Bacteria; p__Bacteroidetes; c__Bacteroidia
OTU_305	30	38	28	25	25	13	42	51	69	51	34	34	27	26	18	0	0	0	4	1	1	0	0	0	0	3	1	0	0	0	0	0	0	0	0	0	0	0	0	0	0	0	0	0	0	d__Bacteria; p__Proteobacteria; c__Alphaproteobacteria; o__Rhizobiales; f__uncultured; g__uncultured_ge; s__uncultured_bacterium
OTU_3050	0	0	0	0	0	0	1	2	1	0	0	0	0	0	0	0	0	0	9	0	0	1	0	0	0	0	0	0	0	0	0	0	0	0	0	0	0	0	0	0	0	0	0	0	0	d__Bacteria; p__Planctomycetes; c__Phycisphaerae; o__Phycisphaerales; f__Phycisphaeraceae; g__AKYG587; s__uncultured_bacterium
OTU_3051	0	0	0	0	3	0	0	0	0	1	1	0	0	0	0	0	0	0	0	0	0	0	0	0	0	0	0	0	0	0	0	0	0	0	0	0	0	0	0	0	0	0	0	0	0	d__Bacteria; p__Planctomycetes; c__Planctomycetacia; o__Pirellulales; f__Pirellulaceae; g__uncultured
[truncated: 1,606 more rows]

## Sheet: Fungal ITS
OTU ID	LDUPA1	LDUPA2	LDUPA3	LDUPC1	LDUPC2	LDUPC3	LDUPK1	LDUPK2	LDUPK3	LDUPL1	LDUPL2	LDUPL3	LDUPW1	LDUPW2	LDUPW3	MJSPA1	MJSPA2	MJSPA3	MJSPC1	MJSPC2	MJSPC3	MJSPK1	MJSPK2	MJSPK3	MJSPL1	MJSPL2	MJSPL3	MJSPW1	MJSPW2	MJSPW3	XLSPA1	XLSPA2	XLSPA3	XLSPC1	XLSPC2	XLSPC3	XLSPK1	XLSPK2	XLSPK3	XLSPL1	XLSPL2	XLSPL3	XLSPW1	XLSPW2	XLSPW3	taxonomy
[truncated: 3,698 more rows]
