# Supplementary material for: Microbial taxonomical composition in spruce phyllosphere, but not community functional structure, varies by geographical location
Source: PeerJ. 2019 Jul 19;7:e7376. doi: 10.7717/peerj.7376 (PMC6644631; doi:10.7717/peerj.7376)
Supplement: Supplemental Information 2 [file peerj-07-7376-s002.xlsx]

## Sheet: S2
Table S2. Diversity metrics across various samples
16S						ITS
Sample	OTUs	Chao	Shannon	Simpson		Sample	OTUs	Chao	Shannon	Simpson
LDPA1	1465	2084	5.02	0.0181		LDPA1	766	1076	3.96	0.0356
LDPA2	1681	2309	4.96	0.0242		LDPA2	822	1041	3.86	0.0617
LDPA3	1597	2044	5.17	0.0167		LDPA3	887	1187	3.79	0.07
LDPC1	1454	2176	5.41	0.0105		LDPC1	608	834	4.01	0.0377
LDPC2	1584	2224	5.06	0.0169		LDPC2	608	930	3.98	0.0454
LDPC3	1479	2198	4.82	0.033		LDPC3	549	790	3.76	0.0503
LDPK1	1862	2394	4.9	0.0251		LDPK1	733	973	4.05	0.0373
LDPK2	1756	2285	4.89	0.0845		LDPK2	692	905	4.38	0.0256
LDPK3	1982	2424	2.76	0.2868		LDPK3	653	933	3.95	0.0398
LDPL1	1828	2302	4.99	0.0182		LDPL1	755	972	3.77	0.0593
LDPL2	1571	2306	5	0.0178		LDPL2	783	1047	3.98	0.0496
LDPL3	1476	2112	4.25	0.1342		LDPL3	888	1178	4.26	0.035
LDPW1	1676	2261	5.15	0.0179		LDPW1	560	869	4	0.0353
LDPW2	1394	2120	5	0.0171		LDPW2	564	785	3.99	0.0349
LDPW3	1249	1808	4.26	0.0627		LDPW3	551	763	3.91	0.0375
MJSPA1	571	840	4.21	0.0306		MJSPA1	836	1101	4.09	0.0392
MJSPA2	446	625	4.06	0.0298		MJSPA2	690	973	3.71	0.0659
MJSPA3	613	757	4.83	0.017		MJSPA3	691	968	4.05	0.0393
MJSPC1	1430	1819	4.78	0.0355		MJSPC1	872	1141	4.09	0.039
MJSPC2	963	1253	3.67	0.0808		MJSPC2	815	1042	3.92	0.0486
MJSPC3	1000	1399	4.79	0.019		MJSPC3	1001	1315	4.36	0.0308
MJSPK1	754	1099	4.26	0.0339		MJSPK1	775	1036	4.23	0.0294
MJSPK2	592	909	4.2	0.0307		MJSPK2	818	1114	4.03	0.0452
MJSPK3	557	885	3.76	0.0551		MJSPK3	718	1011	3.8	0.0702
MJSPL1	1018	1363	4.12	0.0487		MJSPL1	767	1032	3.57	0.0744
MJSPL2	858	1131	4.13	0.0472		MJSPL2	785	958	4.08	0.0374
MJSPL3	1111	1477	4.68	0.024		MJSPL3	866	1176	4.03	0.0436
MJSPW1	379	475	4.21	0.03		MJSPW1	665	950	3.92	0.0446
MJSPW2	530	740	3.07	0.2123		MJSPW2	796	1113	3.92	0.0422
MJSPW3	494	625	3.73	0.0908		MJSPW3	625	816	3.61	0.0738
XLSPA1	718	951	4.61	0.0212		XLSPA1	1053	1400	4.33	0.0273
XLSPA2	726	849	4.82	0.0178		XLSPA2	1080	1528	4.17	0.0414
XLSPA3	524	637	4.61	0.0231		XLSPA3	1040	1363	4.46	0.0299
XLSPC1	744	907	4.57	0.0233		XLSPC1	922	1310	3.51	0.108
XLSPC2	816	1171	4.21	0.0457		XLSPC2	726	1087	3.29	0.1639
XLSPC3	556	776	3.75	0.085		XLSPC3	843	1170	3.77	0.0694
XLSPK1	835	1110	4.49	0.031		XLSPK1	1093	1480	3.91	0.0702
XLSPK2	754	1038	4.13	0.0471		XLSPK2	998	1367	3.63	0.0887
XLSPK3	586	715	3.82	0.1515		XLSPK3	926	1322	3.95	0.0628
XLSPL1	755	985	4.12	0.0429		XLSPL1	949	1189	3.36	0.1257
XLSPL2	921	1277	4.73	0.0217		XLSPL2	792	1157	3.61	0.073
XLSPL3	717	1033	4.37	0.0285		XLSPL3	903	1319	3.43	0.1182
XLSPW1	579	695	4.86	0.0179		XLSPW1	1007	1514	4.32	0.0294
XLSPW2	673	892	4.7	0.0198		XLSPW2	1034	1584	3.98	0.0474
XLSPW3	687	877	4.81	0.0205		XLSPW3	1075	1556	4.29	0.0321
