# Supplementary material for: Microbial taxonomical composition in spruce phyllosphere, but not community functional structure, varies by geographical location
Source: PeerJ. 2019 Jul 19;7:e7376. doi: 10.7717/peerj.7376 (PMC6644631; doi:10.7717/peerj.7376)
Supplement: Supplemental Information 4 — Signif. codes: 0 ‘***’ 0.001 ‘**’ 0.01 ‘*’ 0.05. [file peerj-07-7376-s004.xlsx]

## Sheet: S4
Table S4. Results of the PERMANOVA on the Microbial Taxnonmical Composition and Community Functional Structure
Bacterial 16S rRNA								Fungal ITS
Taxonomical OTUs								Taxonomical OTUs
	Df	SumsOfSqs	MeanSqs	F.Model	R2	Pr(>F)			Df	SumsOfSqs	MeanSqs	F.Model	R2	Pr(>F)
Location	2	6.0538	3.02688	25.9527	0.48531	0.0001 ***		Location	2	6.7986	3.3993	54.034	0.55437	1e-04 ***
Plant	4	1.0744	0.26859	2.3029	0.08613	0.0012**		Plant	4	1.3205	0.3301	5.248	0.10767	1e-04 ***
Location*Plant	8	1.8468	0.23085	1.9793	0.14806	0.0010***		Location*Plant	8	2.2573	0.2822	4.485	0.18407	1e-04 ***
Residuals	30	3.4989	0.11663		0.2805			Residuals	30	1.8873	0.0629		0.15389
Total	44	12.4739			1			Total	44	12.2637			1
KEGG orthologs (KOs)								Functional guilds
	Df	SumsOfSqs	MeanSqs	F.Model	R2	Pr(>F)			Df	SumsOfSqs	MeanSqs	F.Model	R2	Pr(>F)
Location	2	0.17616	0.088081	3.4547	0.135	0.0134*		Location	2	3.3678	1.68392	56.836	0.60908	1e-04 ***
Plant	4	0.12689	0.031722	1.2442	0.09724	0.2686		Plant	4	0.4766	0.11914	4.021	0.08619	1e-04 ***
Location*Plant	8	0.23695	0.029619	1.1617	0.18159	0.305		Location*Plant	8	0.7962	0.09952	3.359	0.14399	2e-04 ***
Residuals	30	0.76488	0.025496		0.58617			Residuals	30	0.8888	0.02963		0.16075
Total	44	1.30488			1			Total	44	5.5294			1
Signif. codes: 0 ‘***’ 0.001 ‘**’ 0.01 ‘*’ 0.05
