# Supplementary material for: Microbial taxonomical composition in spruce phyllosphere, but not community functional structure, varies by geographical location
Source: PeerJ. 2019 Jul 19;7:e7376. doi: 10.7717/peerj.7376 (PMC6644631; doi:10.7717/peerj.7376)
Supplement: Supplemental Information 6 [file peerj-07-7376-s006.xlsx]

## Sheet: S6
Table S6. Result of the indicator species analysis in 16S datasets
Number	Phylum	Class	LDU	MJS	XLS	LDU.MJS	LDU.XLS	MJS.XLS	LDU.MJS.XLS	s.LDU	s.MJS	s.XLS	index	stat	p.value	p.adjust.fdr
1	Acidobacteria	Acidobacteriia	0.209985	0.0905454	0.971971	0.218869	0.994394	0.910194	0.954521	1	0	1	5	0.994394	0.001	0.001575
2		Holophagae	0.978554	0.135948	0.0194211	0.855137	0.737716	0.112827	0.730297	1	0	0	1	0.978554	0.001	0.001575
3		Subgroup_17	0.900254	0.228665	0.108465	0.811679	0.722197	0.238459	0.730297	1	0	0	1	0.900254	0.001	0.001575
4		Subgroup_5	0.772328	0.0837708	0	0.60553	0.546119	0.0592349	0.494413	1	0	0	1	0.772328	0.001	0.001575
5		Thermoanaerobaculia	0.977718	0.103607	0.0628872	0.811639	0.803242	0.121199	0.745356	1	0	0	1	0.977718	0.001	0.001575
6		Subgroup_6	0.821976	0.498935	0.164991	0.947991	0.785958	0.509396	0.930949	1	1	0	4	0.947991	0.002	0.00273913
7		Other	0.661438	0.0645497	0	0.516398	0.467707	0.0456435	0.421637	1	0	0	1	0.661438	0.003	0.00385714
8		Subgroup_25	0.570899	0.210819	0.0608581	0.561084	0.447214	0.197203	0.494413	1	0	0	1	0.570899	0.035	0.0416038
9	Actinobacteria	Other	0.899398	0.058284	0.210146	0.687622	0.785619	0.195491	0.68313	1	0	0	1	0.899398	0.001	0.001575
10		0319_7L14	0.995546	0.0486864	0	0.795822	0.703957	0.0344265	0.649786	1	0	0	1	0.995546	0.001	0.001575
11		Rubrobacteria	0.927224	0.285237	0.0779208	0.904519	0.765053	0.264816	0.816497	1	0	0	1	0.927224	0.001	0.001575
12		MB_A2_108	0.864064	0.348811	0.168392	0.87992	0.75647	0.367618	0.829993	1	1	0	4	0.87992	0.002	0.00273913
13		Nitriliruptoria	0.724569	0.105409	0.0527046	0.592781	0.552771	0.111803	0.516398	1	0	0	1	0.724569	0.003	0.00385714
14		Coriobacteriia	0.57735	0	0	0.408248	0.408248	0	0.333333	1	0	0	1	0.57735	0.006	0.00756
15	Armatimonadetes	Chthonomonadetes	0.235087	0.0278019	0.897985	0.186501	0.928247	0.68419	0.788811	1	0	1	5	0.928247	0.001	0.001575
16		uncultured	0.96406	0.118818	0	0.774597	0.681693	0.0840168	0.632456	1	0	0	1	0.96406	0.001	0.001575
17	Bacteroidetes	Ignavibacteria	0.936855	0.175201	0.0219001	0.792955	0.686981	0.142771	0.666667	1	0	0	1	0.936855	0.001	0.001575
18		Rhodothermia	0.890693	0.182574	0.0408248	0.764853	0.661438	0.158114	0.649786	1	0	0	1	0.890693	0.001	0.001575
19	Chlamydiae	Chlamydiae	0.358546	0.0210819	0.889819	0.275379	0.947101	0.67396	0.802773	1	0	1	5	0.947101	0.001	0.001575
20	Chloroflexi	Other	0.789893	0.047741	0.513077	0.6027	0.922958	0.403687	0.788811	1	0	1	5	0.922958	0.001	0.001575
21		Gitt_GS_136	0.866025	0.313581	0.102353	0.839359	0.707023	0.302765	0.760117	1	0	0	1	0.866025	0.001	0.001575
22		JG30_KF_CM66	0.865868	0.219288	0.033059	0.768221	0.640184	0.181071	0.649786	1	0	0	1	0.865868	0.001	0.001575
23		Ktedonobacteria	0.851569	0.156492	0.0521641	0.715237	0.63994	0.147542	0.614636	1	0	0	1	0.851569	0.001	0.001575
24		OLB14	0.929735	0.116445	0.0672293	0.739904	0.71347	0.134459	0.649786	1	0	0	1	0.929735	0.001	0.001575
25		P2_11E	0.774597	0	0	0.547723	0.547723	0	0.447214	1	0	0	1	0.774597	0.001	0.001575
26		TK10	0.864489	0.349265	0.0893237	0.865052	0.717067	0.330886	0.788811	1	1	0	4	0.865052	0.001	0.001575
27		Anaerolineae	0.904291	0.329875	0.150269	0.915047	0.842424	0.357184	0.894427	1	1	0	4	0.915047	0.002	0.00273913
28		Dehalococcoidia	0.837708	0.342562	0.0789799	0.836077	0.651285	0.299122	0.730297	1	0	0	1	0.837708	0.002	0.00273913
29		KD4_96	0.80685	0.469117	0.189362	0.907904	0.778835	0.505894	0.906765	1	1	0	4	0.907904	0.003	0.00385714
30	Dependentiae	Babeliae	0.861708	0	0.138394	0.60932	0.730297	0.0978592	0.596285	1	0	0	1	0.861708	0.001	0.001575
31	Elusimicrobia	Lineage_IIb	0.774597	0	0	0.547723	0.547723	0	0.447214	1	0	0	1	0.774597	0.002	0.00273913
32		Elusimicrobia	0.632456	0.09759	0	0.516398	0.447214	0.0690066	0.421637	1	0	0	1	0.632456	0.007	0.00864706
33		Lineage_IIa	0.57735	0	0	0.408248	0.408248	0	0.333333	1	0	0	1	0.57735	0.008	0.00969231
34	Entotheonellaeota	Entotheonellia	0.758947	0.44302	0.136626	0.850725	0.649102	0.428641	0.788811	1	1	0	4	0.850725	0.001	0.001575
35	Fibrobacteres	Fibrobacteria	0.985037	0.0513835	0.0256917	0.749037	0.72303	0.0545004	0.632456	1	0	0	1	0.985037	0.001	0.001575
36	Firmicutes	Clostridia	0.898778	0.317579	0.206461	0.953236	0.812017	0.375427	0.906765	1	1	0	4	0.953236	0.001	0.001575
37		Erysipelotrichia	0.904097	0.284885	0.0240772	0.852617	0.663762	0.220671	0.71492	1	0	0	1	0.904097	0.001	0.001575
38		Negativicutes	0.966092	0	0	0.68313	0.68313	0	0.557773	1	0	0	1	0.966092	0.001	0.001575
39	Gemmatimonadetes	Other	0.986546	0.101948	0.0243703	0.854439	0.744343	0.0895423	0.730297	1	0	0	1	0.986546	0.001	0.001575
40		AKAU4049	0.993808	0.0286888	0	0.730297	0.702728	0.020286	0.596285	1	0	0	1	0.993808	0.001	0.001575
41		BD2_11_terrestrial_group	0.982255	0.0634043	0.0183032	0.750879	0.719203	0.0593093	0.632456	1	0	0	1	0.982255	0.001	0.001575
42		Gemmatimonadetes	0.980894	0.139947	0.0712813	0.908997	0.881191	0.15482	0.869227	1	0	0	1	0.980894	0.001	0.001575
43		Longimicrobia	0.971309	0.200759	0.0536973	0.945748	0.834499	0.189263	0.869227	1	0	0	1	0.971309	0.001	0.001575
44		S0134_terrestrial_group	0.992445	0.0508001	0.0119737	0.773763	0.72557	0.0448014	0.649786	1	0	0	1	0.992445	0.001	0.001575
45	Nitrospirae	Nitrospira	0.803219	0.359211	0.102203	0.822121	0.6403	0.326269	0.730297	1	1	0	4	0.822121	0.001	0.001575
46	Patescibacteria	Other	0.730297	0.11547	0	0.60553	0.516398	0.0816497	0.494413	1	0	0	1	0.730297	0.001	0.001575
47		Parcubacteria	0.856349	0	0	0.60553	0.60553	0	0.494413	1	0	0	1	0.856349	0.001	0.001575
48		ABY1	0.516398	0	0	0.365148	0.365148	0	0.298142	1	0	0	1	0.516398	0.038	0.0443333
49	Planctomycetes	Other	0.894427	0.0716115	0	0.68313	0.632456	0.050637	0.557773	1	0	0	1	0.894427	0.001	0.001575
50		BD7_11	0.872872	0.0563436	0	0.658281	0.617213	0.039841	0.537484	1	0	0	1	0.872872	0.001	0.001575
51		OM190	0.825864	0.253185	0.101274	0.764601	0.65633	0.25064	0.68313	1	0	0	1	0.825864	0.001	0.001575
52		Pla4_lineage	0.942234	0.0806478	0	0.730297	0.66626	0.0570266	0.596285	1	0	0	1	0.942234	0.001	0.001575
53		vadinHA49	0.930949	0	0	0.658281	0.658281	0	0.537484	1	0	0	1	0.930949	0.001	0.001575
54	WPS_2	WPS_2_cl	0.126491	0	0.708049	0.0894427	0.632456	0.500666	0.516398	0	0	1	3	0.708049	0.002	0.00273913
