# Supplementary material for: Microbial taxonomical composition in spruce phyllosphere, but not community functional structure, varies by geographical location
Source: PeerJ. 2019 Jul 19;7:e7376. doi: 10.7717/peerj.7376 (PMC6644631; doi:10.7717/peerj.7376)
Supplement: Supplemental Information 7 [file peerj-07-7376-s007.xlsx]

## Sheet: S7
Table S7. Result of the indicator species analysis in ITS datasets
Number	Class	Order	LDU	MJS	XLS	LDU.MJS	LDU.XLS	MJS.XLS	LDU.MJS.XLS	s.LDU	s.MJS	s.XLS	index	stat	p.value	fdr.qval	p.adjust.fdr
1	Agaricomycetes	Amylocorticiales	0	0.321722	0.926745	0.227492	0.655308	0.930949	0.760117	0	1	1	6	0.930949	0.001	0.00022356	0.00157778
2		Atheliales	0	0.0709932	0.98732	0.0501998	0.69814	0.774597	0.632456	0	0	1	3	0.98732	0.001	0.00022356	0.00157778
3		Auriculariales	0.2635	0.0433406	0.886399	0.229619	0.832722	0.694519	0.730297	0	0	1	3	0.886399	0.001	0.00022356	0.00157778
4		Boletales	0.528134	0.0532434	0.778121	0.429084	0.924328	0.609744	0.802773	1	0	1	5	0.924328	0.001	0.00022356	0.00157778
5		Cantharellales	0.310583	0.0681203	0.928451	0.271272	0.940393	0.746303	0.829993	1	0	1	5	0.940393	0.001	0.00022356	0.00157778
6		Corticiales	0	0.686981	0.726675	0.485769	0.513837	1	0.816497	0	1	1	6	1	0.001	0.00022356	0.00157778
7		Geastrales	0	0.188937	0.776172	0.133599	0.548837	0.68313	0.557773	0	0	1	3	0.776172	0.002	0.00041062	0.00289796
8		Hymenochaetales	0.0916876	0.150132	0.94588	0.18736	0.736694	0.847543	0.745356	0	0	1	3	0.94588	0.001	0.00022356	0.00157778
9		Polyporales	0.0631341	0.109869	0.988654	0.122645	0.868964	0.945132	0.881917	0	0	1	3	0.988654	0.001	0.00022356	0.00157778
10		Russulales	0.0673889	0.126609	0.984962	0.137493	0.828887	0.960592	0.869227	0	0	1	3	0.984962	0.001	0.00022356	0.00157778
11		Sebacinales	0.999832	0	0.00947311	0.706988	0.795822	0.0066985	0.649786	1	0	0	1	0.999832	0.001	0.00022356	0.00157778
12		Thelephorales	0.994125	0.00287168	0.107664	0.726052	0.999938	0.0790449	0.829993	1	0	1	5	0.999938	0.001	0.00022356	0.00157778
13		Trechisporales	0	0.0249653	0.995315	0.0176532	0.703794	0.730297	0.596285	0	0	1	3	0.995315	0.001	0.00022356	0.00157778
14	Arthoniomycetes	Other	0.283598	0.828965	0.374797	0.793927	0.478957	0.909756	0.906765	0	1	1	6	0.909756	0.016	0.00291678	0.0206545
15		unidentified	0	0	1	0	0.707107	0.707107	0.57735	0	0	1	3	1	0.001	0.00022356	0.00157778
16	Dacrymycetes	Dacrymycetales	0	0	0.57735	0	0.408248	0.408248	0.333333	0	0	1	3	0.57735	0.008	0.0014904	0.0105185
17	Dothideomycetes	Acrospermales	0.68313	0	0	0.483046	0.483046	0	0.394405	1	0	0	1	0.68313	0.002	0.00041062	0.00289796
18		unidentified	0.00673282	0.0739939	0.993774	0.0575322	0.726	0.856058	0.71492	0	0	1	3	0.993774	0.001	0.00022356	0.00157778
19		Patellariales	0	0	0.894427	0	0.632456	0.632456	0.516398	0	0	1	3	0.894427	0.001	0.00022356	0.00157778
20		Valsariales	0.0725901	0	0.700841	0.0513289	0.547723	0.49557	0.447214	0	0	1	3	0.700841	0.001	0.00022356	0.00157778
21		Venturiales	0	0.624864	0.736803	0.441845	0.520998	0.966092	0.788811	0	1	1	6	0.966092	0.001	0.00022356	0.00157778
22	Eurotiomycetes	Other	0	0.779084	0.57128	0.550896	0.403956	0.966092	0.788811	0	1	1	6	0.966092	0.001	0.00022356	0.00157778
23		Phaeomoniellales	0	0	0.930949	0	0.658281	0.658281	0.537484	0	0	1	3	0.930949	0.001	0.00022356	0.00157778
24		Verrucariales	0.997101	0.0481273	0	0.83666	0.705057	0.0340311	0.68313	1	0	0	1	0.997101	0.001	0.00022356	0.00157778
25	Exobasidiomycetes	Entylomatales	0.170523	0.63152	0	0.57735	0.120578	0.446552	0.471405	0	1	0	2	0.63152	0.002	0.00041062	0.00289796
26		Exobasidiales	0	0	0.774597	0	0.547723	0.547723	0.447214	0	0	1	3	0.774597	0.001	0.00022356	0.00157778
27	Glomeromycetes	Glomerales	0.516398	0	0	0.365148	0.365148	0	0.298142	1	0	0	1	0.516398	0.03	0.00527086	0.0373684
28	Lecanoromycetes	Other	0	0.0219893	0.999093	0.0155488	0.706465	0.795822	0.649786	0	0	1	3	0.999093	0.001	0.00022356	0.00157778
29		Caliciales	0.0170593	0.437378	0.794785	0.328226	0.583596	0.873682	0.730297	0	1	1	6	0.873682	0.001	0.00022356	0.00157778
30		Candelariales	0	0	0.632456	0	0.447214	0.447214	0.365148	0	0	1	3	0.632456	0.002	0.00041062	0.00289796
31		Lecanorales	0	0.0408495	0.888813	0.028885	0.628485	0.68313	0.557773	0	0	1	3	0.888813	0.001	0.00022356	0.00157778
32		Ostropales	0.0429401	0	0.67839	0.0303632	0.547723	0.479694	0.447214	0	0	1	3	0.67839	0.005	0.000967326	0.00682692
33	Leotiomycetes	Phacidiales	0.04393	0.03635	0.887378	0.0605244	0.749033	0.68115	0.649786	0	0	1	3	0.887378	0.001	0.00022356	0.00157778
34		Rhytismatales	0	0.0306193	0.959275	0.0216511	0.67831	0.707107	0.57735	0	0	1	3	0.959275	0.001	0.00022356	0.00157778
35	Lichinomycetes	Lichinales	0	0	0.516398	0	0.365148	0.365148	0.298142	0	0	1	3	0.516398	0.03	0.00527086	0.0373684
36	Microbotryomycetes	Other	0.0175153	0.210824	0.969453	0.161461	0.70972	0.946498	0.788811	0	0	1	3	0.969453	0.001	0.00022356	0.00157778
37		unidentified	0.0024139	0.372171	0.890026	0.276067	0.650019	0.912831	0.760117	0	1	1	6	0.912831	0.001	0.00022356	0.00157778
38	Mixiomycetes	Mixiales	0	0	1	0	0.707107	0.707107	0.57735	0	0	1	3	1	0.001	0.00022356	0.00157778
39	Mortierellomycetes	Mortierellales	0.978616	0.128601	0.0428108	0.853401	0.781594	0.124556	0.760117	1	0	0	1	0.978616	0.001	0.00022356	0.00157778
40	Pezizomycetes	Pezizales	0.980217	0.0394902	0.193657	0.96458	0.999164	0.194597	0.988826	1	0	1	5	0.999164	0.001	0.00022356	0.00157778
41	Pucciniomycetes	Platygloeales	0.730297	0	0	0.516398	0.516398	0	0.421637	1	0	0	1	0.730297	0.001	0.00022356	0.00157778
42		Septobasidiales	0	0.127636	0.949079	0.0902523	0.6711	0.83666	0.68313	0	0	1	3	0.949079	0.001	0.00022356	0.00157778
43		unidentified	0	0	0.57735	0	0.408248	0.408248	0.333333	0	0	1	3	0.57735	0.006	0.00113889	0.00803774
44	Rhizophlyctidomycetes	Rhizophlyctidales	0.891746	0.0199759	0	0.658281	0.63056	0.0141251	0.537484	1	0	0	1	0.891746	0.001	0.00022356	0.00157778
45	Saccharomycetes	Saccharomycetales	0.913514	0.0421578	0.114759	0.719918	0.812861	0.111216	0.71492	1	0	0	1	0.913514	0.001	0.00022356	0.00157778
46	Sordariomycetes	Boliniales	0	0.74612	0.0693663	0.527586	0.0490494	0.57735	0.471405	0	1	0	2	0.74612	0.001	0.00022356	0.00157778
47		Chaetosphaeriales	0.0180264	0.314126	0.896213	0.236162	0.657816	0.910643	0.760117	0	1	1	6	0.910643	0.001	0.00022356	0.00157778
48		Diaporthales	0.983191	0.166869	0.0404189	0.98147	0.843478	0.152756	0.894427	1	0	0	1	0.983191	0.001	0.00022356	0.00157778
49		Glomerellales	0.576596	0.239125	0.752207	0.601515	0.944083	0.746961	0.942809	1	0	1	5	0.944083	0.001	0.00022356	0.00157778
50		Lulworthiales	0	0.22219	0.782185	0.157112	0.553088	0.795822	0.649786	0	1	1	6	0.795822	0.004	0.000789034	0.00556863
51		Melanosporales	0.632456	0	0	0.447214	0.447214	0	0.365148	1	0	0	1	0.632456	0.003	0.000603611	0.00426
52		Togniniales	0.816497	0	0	0.57735	0.57735	0	0.471405	1	0	0	1	0.816497	0.001	0.00022356	0.00157778
53	Spizellomycetes	Spizellomycetales	0.984582	0.121072	0.0573535	0.891665	0.864833	0.131678	0.843274	1	0	0	1	0.984582	0.001	0.00022356	0.00157778
54	Taphrinomycetes	unidentified	0	0.966092	0	0.68313	0	0.68313	0.557773	0	1	0	2	0.966092	0.001	0.00022356	0.00157778
55	Tremellomycetes	Other	0.0549905	0.0953764	0.816526	0.110056	0.617905	0.667457	0.57735	0	0	1	3	0.816526	0.001	0.00022356	0.00157778
56		Holtermanniales	0.516398	0	0	0.365148	0.365148	0	0.298142	1	0	0	1	0.516398	0.035	0.0060708	0.0428448
57		Trichosporonales	0.917244	0.0832803	0.0146485	0.75156	0.674188	0.069794	0.632456	1	0	0	1	0.917244	0.001	0.00022356	0.00157778
58	Ustilaginomycetes	Ustilaginales	0.922866	0.0339513	0	0.68313	0.652565	0.0240072	0.557773	1	0	0	1	0.922866	0.001	0.00022356	0.00157778
